# Supplementary material for: SPAG5 upregulation contributes to enhanced c-MYC transcriptional activity via interaction with c-MYC binding protein in triple-negative breast cancer
Source: Springer Nature journal article supplement (doi:10.1186/s13045-019-0700-2), 2019-02-08

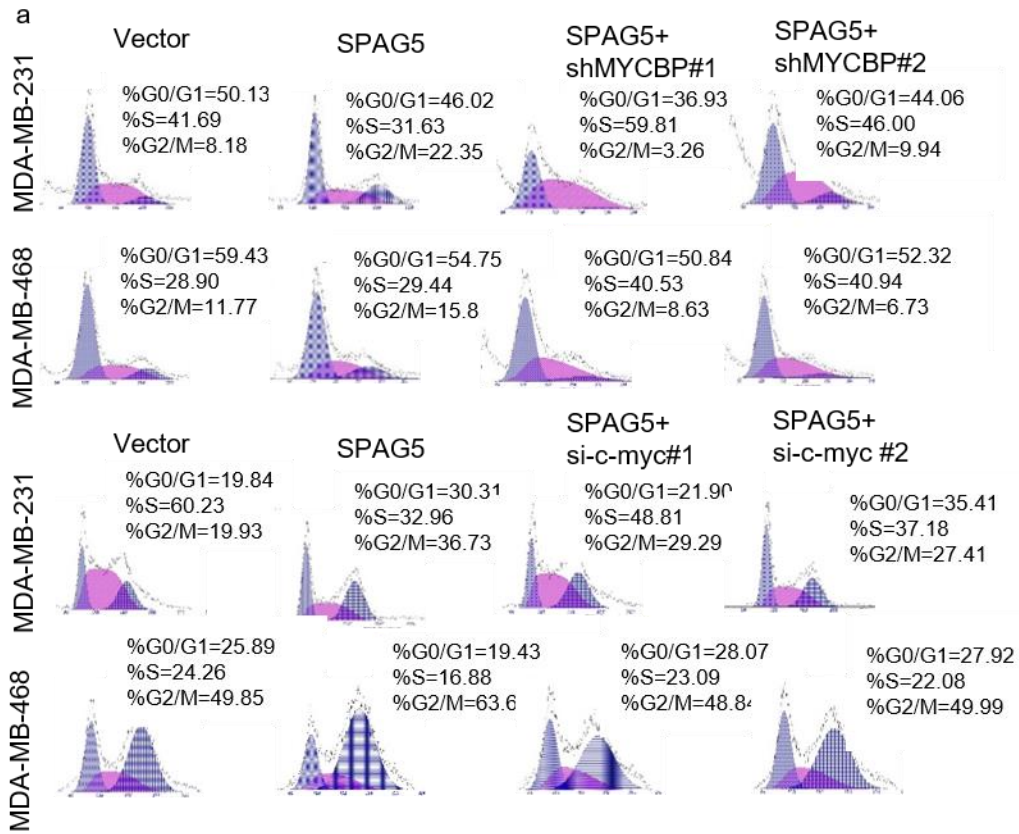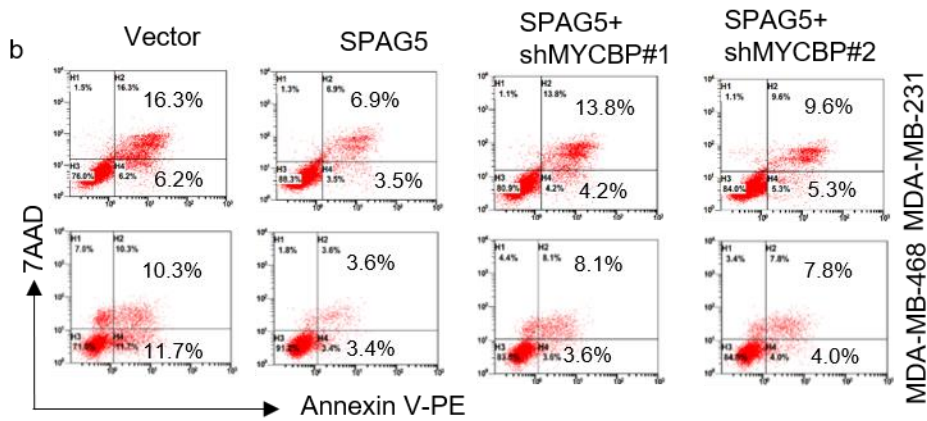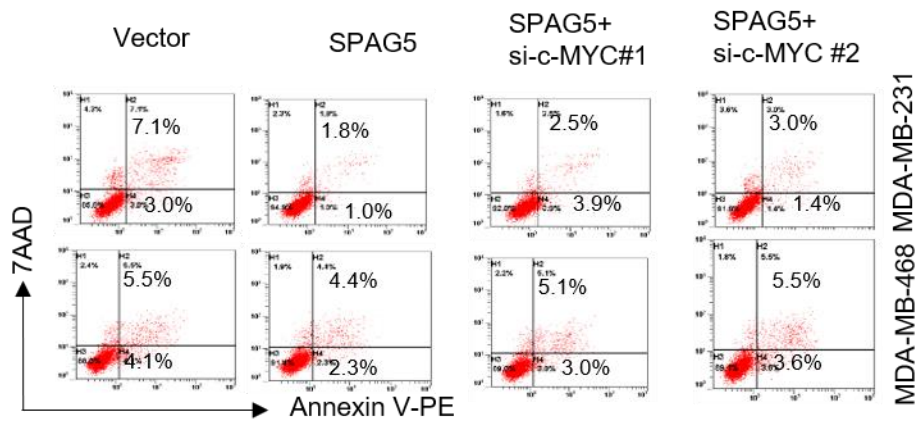

Supplement: MOESM10 [file 16460218]
