# Supplementary material for: SPAG5 upregulation contributes to enhanced c-MYC transcriptional activity via interaction with c-MYC binding protein in triple-negative breast cancer
Source: J Hematol Oncol. 2019 Feb 8;12:14. doi: 10.1186/s13045-019-0700-2 (PMC6367803; doi:10.1186/s13045-019-0700-2)
Supplement: Supplementary file 8 — Table S5. Differential mRNA expression in SPAG5 overexpression MDA-MB-231 cells compared with that in vector cells in RNA-sequencing analysis. (XLSX 6260 kb) [file 13045_2019_700_MOESM8_ESM.xlsx]

## Sheet: 2s_vs_2v.gene_DE.addAnno
Gene id	231-Vector	231-SPAG5	log2FoldChange	pValue	qValue	result	GeneName	GeneDescription	GO	KEGG	KOG
ENSG00000089157	2034.28	6174.45	-1.60179	0	0	down	RPLP0	ribosomal protein lateral stalk subunit P0 [Source:HGNC Symbol;Acc:HGNC:10371]	GO:0005515;GO:0005840;GO:0005622;GO:0030529;GO:0005829;GO:0005783;GO:0006412;GO:0016020;GO:0005737;GO:0005634;GO:0003723;GO:0003735;GO:0042254;GO:0005925;GO:0070062;GO:0016032;GO:0022625;GO:0006413;GO:0006364;GO:0036464;GO:0000184;GO:0019083;GO:0006614;GO:0030425;GO:0071353	K02941-ko03010 Ribosome	KOG0815-60S acidic ribosomal protein P0[J]
ENSG00000198695	3198.64	10735.7	-1.74688	0	0	down	MT-ND6	mitochondrially encoded NADH:ubiquinone oxidoreductase core subunit 6 [Source:HGNC Symbol;Acc:HGNC:7462]	GO:0005739;GO:0042542;GO:0042220;GO:0035094;GO:0055114;GO:0016491;GO:0016021;GO:0016020;GO:0070469;GO:0008137;GO:0031966;GO:0006120;GO:0032981;GO:0005743	K03884-ko00190 Oxidative phosphorylation;ko05012 Parkinson's disease	-
ENSG00000251562	35.5556	368.888	-3.37504	0	0	down	MALAT1	metastasis associated lung adenocarcinoma transcript 1 (non-protein coding) [Source:HGNC Symbol;Acc:HGNC:29665]	-	-	-
ENSG00000105372	14659.4	6990.18	1.06842	0	0	up	RPS19	ribosomal protein S19 [Source:HGNC Symbol;Acc:HGNC:10402]	GO:0007219;GO:0005515;GO:0042803;GO:0005829;GO:0005840;GO:0006412;GO:0003735;GO:0005622;GO:0030529;GO:0016020;GO:0005737;GO:0005634;GO:0003723;GO:0000028;GO:0022627;GO:0005925;GO:0006364;GO:0042274;GO:0005730;GO:0070062;GO:0005654;GO:0031012;GO:0006413;GO:0019901;GO:0000184;GO:0019083;GO:0051262;GO:0017134;GO:0006614;GO:0002548;GO:0000462;GO:0007000;GO:0009991;GO:0030218;GO:0030490;GO:0051272;GO:…	K02966-ko03010 Ribosome	KOG3411-40S ribosomal protein S19[J]
ENSG00000243678	1714.13	38.5075	5.4762	0	0	up	NME2	NME/NM23 nucleoside diphosphate kinase 2 [Source:HGNC Symbol;Acc:HGNC:7850]	GO:0005515;GO:0003700;GO:0006355;GO:0006351;GO:0003677;GO:0016310;GO:0016301;GO:0016740;GO:0005524;GO:0000166;GO:0046872;GO:0005737;GO:0005634;GO:0007229;GO:0004550;GO:0006165;GO:0006183;GO:0006228;GO:0006241;GO:0009117;GO:0042995;GO:0005576;GO:0045944;GO:0005829;GO:0030027;GO:0070062;GO:0071944;GO:0001726;GO:0043312;GO:0034774;GO:1904813;GO:0015949;GO:0009142;GO:0050679;GO:0043066;GO:0007155;GO:…	K00940-ko00230 Purine metabolism;ko00240 Pyrimidine metabolism	KOG0888-Nucleoside diphosphate kinase[F]
ENSG00000210082	2548.94	5520.44	-1.11489	0	0	down	MT-RNR2	mitochondrially encoded 16S RNA [Source:HGNC Symbol;Acc:HGNC:7471]	-	-	-
ENSG00000170421	126.347	863.367	-2.77258	0	0	down	KRT8	keratin 8 [Source:HGNC Symbol;Acc:HGNC:6446]	GO:0005882;GO:0005515;GO:0045111;GO:0005198;GO:0005737;GO:0005634;GO:0005654;GO:0045095;GO:0005829;GO:0070062;GO:0031424;GO:0016032;GO:0016363;GO:0097110;GO:0070268;GO:0071944;GO:0043034;GO:0042383;GO:0030018;GO:0016327;GO:0016010;GO:0005911;GO:0097284;GO:0097191;GO:0060706;GO:0051707;GO:0051599;GO:0045214;GO:0033209;GO:0032403	-	-
ENSG00000210184	3673.16	31456.2	-3.09825	0	0	down	MT-TS2	mitochondrially encoded tRNA serine 2 (AGU/C) [Source:HGNC Symbol;Acc:HGNC:7498]	-	-	-
ENSG00000174444	40.8068	442.093	-3.43747	0	0	down	RPL4	ribosomal protein L4 [Source:HGNC Symbol;Acc:HGNC:10353]	GO:0005515;GO:0005840;GO:0006412;GO:0003735;GO:0030529;GO:0016020;GO:0005737;GO:0005634;GO:0003723;GO:0005925;GO:0005730;GO:0005829;GO:0070062;GO:0006413;GO:0006364;GO:0000184;GO:0019083;GO:0006614;GO:0022625	K02930-ko03010 Ribosome	KOG1475-Ribosomal protein RPL1/RPL2/RL4L4[A]
ENSG00000196924	1158.81	1743.2	-0.589088	0	0	-	FLNA	filamin A [Source:HGNC Symbol;Acc:HGNC:3754]	GO:0003779;GO:0051015;GO:0004871;GO:0005515;GO:0015629;GO:0005886;GO:0005829;GO:0016020;GO:0005737;GO:0005634;GO:0003723;GO:0005856;GO:0005925;GO:0005576;GO:0060271;GO:0045296;GO:0070062;GO:0030030;GO:0005938;GO:0031012;GO:0043123;GO:0030334;GO:0042803;GO:0044325;GO:0070527;GO:0002576;GO:0008134;GO:0001664;GO:0001948;GO:0030168;GO:0043433;GO:0042993;GO:0005911;GO:0050821;GO:0043113;GO:0044319;GO:…	K04437-ko04010 MAPK signaling pathway;ko04510 Focal adhesion;ko05205 Proteoglycans in cancer;ko05132 Salmonella infection	KOG0518-Actin-binding cytoskeleton protein, filamin[Z]
ENSG00000210176	2544.26	21669.2	-3.09033	0	0	down	MT-TH	mitochondrially encoded tRNA histidine [Source:HGNC Symbol;Acc:HGNC:7487]	-	-	-
ENSG00000162244	2274.4	549.368	2.04964	0	0	up	RPL29	ribosomal protein L29 [Source:HGNC Symbol;Acc:HGNC:10331]	GO:0005840;GO:0006412;GO:0003735;GO:0005622;GO:0030529;GO:0016020;GO:0003723;GO:0008201;GO:0005829;GO:0045296;GO:0006413;GO:0006364;GO:0000184;GO:0019083;GO:0006614;GO:0002181;GO:0022625;GO:0007566	K02905-ko03010 Ribosome	KOG3504-60S ribosomal protein L29[J]
ENSG00000011052	7.45629	728.13	-6.60959	0	0	down	NME1-NME2	NME1-NME2 readthrough [Source:HGNC Symbol;Acc:HGNC:33531]	GO:0004550;GO:0006165;GO:0006183;GO:0006228;GO:0006241;GO:0016310;GO:0016301;GO:0016740;GO:0005829;GO:0005524;GO:0000166	-	KOG0888-Nucleoside diphosphate kinase[F]
ENSG00000107581	7.89963	141.847	-4.1664	0	0	down	EIF3A	eukaryotic translation initiation factor 3 subunit A [Source:HGNC Symbol;Acc:HGNC:3271]	GO:0071541;GO:0005874;GO:0005852;GO:0005634;GO:0070373;GO:0001732;GO:0030971;GO:0003743;GO:0005515;GO:0005829;GO:0005730;GO:0006413;GO:0006412;GO:0016020;GO:0005737;GO:0003723;GO:0003729;GO:0075522;GO:0005198;GO:0075525;GO:0002188;GO:0043614;GO:0071540	K03254-ko03013 RNA transport	KOG2072-Translation initiation factor 3, subunit a (eIF-3a)[J]
ENSG00000210191	2382.74	17166	-2.84886	0	0	down	MT-TL2	mitochondrially encoded tRNA leucine 2 (CUN) [Source:HGNC Symbol;Acc:HGNC:7491]	-	-	-
ENSG00000198899	733.991	2801.82	-1.93253	0	0	down	MT-ATP6	mitochondrially encoded ATP synthase 6 [Source:HGNC Symbol;Acc:HGNC:7414]	GO:0005739;GO:0055093;GO:0007568;GO:0042407;GO:0006811;GO:0005743;GO:0016021;GO:0016020;GO:0006810;GO:0015078;GO:0015992;GO:0015986;GO:0070062;GO:0045263;GO:0006754;GO:0016887;GO:0022857;GO:0042776;GO:0005753	K02126-ko00190 Oxidative phosphorylation;ko05010 Alzheimer's disease;ko05012 Parkinson's disease;ko05016 Huntington's disease	KOG4665-ATP synthase F0 subunit 6 and related proteins[C]
ENSG00000115053	16.0484	263.56	-4.03763	0	0	down	NCL	nucleolin [Source:HGNC Symbol;Acc:HGNC:7667]	GO:0005730;GO:0005654;GO:0005634;GO:0071364;GO:0045944;GO:0003723;GO:0044547;GO:0017148;GO:0048027;GO:0005515;GO:0030529;GO:0003677;GO:0016020;GO:0005737;GO:0003676;GO:0042802;GO:0070062;GO:0005938;GO:0008022;GO:0001525;GO:0036464;GO:0042162;GO:1901838	K11294-ko05130 Pathogenic Escherichia coli infection	-
ENSG00000145901	64.1293	317.768	-2.30892	0	0	down	TNIP1	TNFAIP3 interacting protein 1 [Source:HGNC Symbol;Acc:HGNC:16903]	GO:0005515;GO:0005654;GO:0005829;GO:0005737;GO:0005634;GO:0002755;GO:0006954;GO:0042802;GO:0050727;GO:0043124;GO:0070373;GO:0045944;GO:0005622;GO:0016579;GO:0045071;GO:0004843;GO:0050729;GO:0006412;GO:0006952;GO:0051019;GO:0009101;GO:0007159;GO:0085032	-	-
ENSG00000210140	122805	87470.9	0.489498	0	0	-	MT-TC	mitochondrially encoded tRNA cysteine [Source:HGNC Symbol;Acc:HGNC:7477]	-	-	-
ENSG00000067225	609.132	218.015	1.48233	0	0	up	PKM	pyruvate kinase, muscle [Source:HGNC Symbol;Acc:HGNC:9021]	GO:0008152;GO:0003824;GO:0005515;GO:0005739;GO:0005829;GO:0006096;GO:0016310;GO:0016301;GO:0000287;GO:0016740;GO:0005524;GO:0000166;GO:0046872;GO:0005737;GO:0005634;GO:0003723;GO:0004743;GO:0030955;GO:0005576;GO:0045296;GO:0070062;GO:0031012;GO:0043312;GO:0034774;GO:1904813;GO:0031982;GO:0012501;GO:1903561;GO:0061621;GO:0023026;GO:0032869;GO:1902912;GO:0043209;GO:0005929;GO:0051289;GO:0043403;GO:…	K00873-ko01200 Carbon metabolism;ko01230 Biosynthesis of amino acids;ko00010 Glycolysis / Gluconeogenesis;ko00620 Pyruvate metabolism;ko00230 Purine metabolism;ko04922 Glucagon signaling pathway;ko05230 Central carbon metabolism in cancer;ko05203 Viral carcinogenesis;ko04930 Type II diabetes mellitus	KOG2323-Pyruvate kinase[G]
ENSG00000096384	125.229	545.266	-2.12239	0	0	down	HSP90AB1	heat shock protein 90 alpha family class B member 1 [Source:HGNC Symbol;Acc:HGNC:5258]	GO:1901389;GO:0051131;GO:0043008;GO:0005524;GO:0097718;GO:0042803;GO:0005737;GO:0043234;GO:0042470;GO:0005576;GO:0005515;GO:0005886;GO:0005739;GO:0006457;GO:0005829;GO:0000166;GO:0016020;GO:0005634;GO:0003723;GO:0051082;GO:0006950;GO:0038096;GO:0006986;GO:0045296;GO:0070062;GO:0008180;GO:0005654;GO:0071157;GO:0006805;GO:0043312;GO:0032435;GO:0034774;GO:1904813;GO:0045597;GO:0030511;GO:0030911;GO:…	K04079-ko04141 Protein processing in endoplasmic reticulum;ko04151 PI3K-Akt signaling pathway;ko04621 NOD-like receptor signaling pathway;ko04612 Antigen processing and presentation;ko04915 Estrogen signaling pathway;ko04914 Progesterone-mediated oocyte maturation;ko04626 Plant-pathogen interaction;ko05200 Pathways in cancer;ko05215 Prostate cancer	KOG0019-Molecular chaperone (HSP90 family)[O]
ENSG00000158417	8.05382	117.611	-3.8682	0	0	down	EIF5B	eukaryotic translation initiation factor 5B [Source:HGNC Symbol;Acc:HGNC:30793]	GO:0003924;GO:0005515;GO:0005525;GO:0016787;GO:0000166;GO:0046872;GO:0006446;GO:0006413;GO:0006412;GO:0003743;GO:0005737;GO:0003723;GO:0005829	K03243-ko03013 RNA transport	KOG1144-Translation initiation factor 5B (eIF-5B)[J]
ENSG00000213719	1041.49	325.843	1.6764	0	0	up	CLIC1	chloride intracellular channel 1 [Source:HGNC Symbol;Acc:HGNC:2062]	GO:0007165;GO:0005886;GO:0034765;GO:0006811;GO:0005244;GO:0016021;GO:0016020;GO:0005737;GO:0005634;GO:0006810;GO:0005615;GO:0005254;GO:0006821;GO:0034707;GO:1902476;GO:0051726;GO:0005515;GO:0045296;GO:0070062;GO:0072562;GO:0005903;GO:0031965;GO:0070527;GO:0005635;GO:0031982;GO:0048471;GO:0005739;GO:0051881;GO:0045669	-	-
ENSG00000136938	88.7695	622.708	-2.81042	0	0	down	ANP32B	acidic nuclear phosphoprotein 32 family member B [Source:HGNC Symbol;Acc:HGNC:16677]	GO:0005634;GO:0060021;GO:0048839;GO:0021591;GO:0001944;GO:0005515;GO:0006334;GO:0005737;GO:0005730;GO:0070062;GO:0042393;GO:0045596;GO:0006919;GO:0070063;GO:0046827	-	KOG2739-Leucine-rich acidic nuclear protein[DR]
ENSG00000163682	384.399	2147.97	-2.4823	0	0	down	RPL9	ribosomal protein L9 [Source:HGNC Symbol;Acc:HGNC:10369]	GO:0005515;GO:0005840;GO:0006412;GO:0003735;GO:0005622;GO:0030529;GO:0016020;GO:0005634;GO:0019843;GO:0005925;GO:0005829;GO:0031012;GO:0006413;GO:0003723;GO:0006364;GO:0000184;GO:0019083;GO:0006614;GO:0002181;GO:0022625	K02940-ko03010 Ribosome	KOG3255-60S ribosomal protein L9[J]
ENSG00000181163	64.5379	480.692	-2.8969	0	0	down	NPM1	nucleophosmin [Source:HGNC Symbol;Acc:HGNC:7910]	GO:0005730;GO:0001105;GO:0034644;GO:0001047;GO:0005654;GO:0033613;GO:0045944;GO:0032993;GO:0005515;GO:0043234;GO:0007165;GO:0042803;GO:0006334;GO:0006366;GO:0016020;GO:0005737;GO:0005634;GO:0003723;GO:0003676;GO:0006281;GO:0005856;GO:0004860;GO:0003713;GO:0045893;GO:0006886;GO:0045727;GO:0005925;GO:0005813;GO:0005815;GO:0005829;GO:0006977;GO:0008285;GO:0034080;GO:0008284;GO:0016032;GO:0043066;GO:…	-	-
ENSG00000214087	430.049	29.2964	3.8757	0	0	up	ARL16	ADP ribosylation factor like GTPase 16 [Source:HGNC Symbol;Acc:HGNC:27902]	GO:0005515;GO:0005525;GO:0005622;GO:0000166;GO:0007264	-	KOG0072-GTP-binding ADP-ribosylation factor-like protein ARL1[U]
ENSG00000166598	43.4357	287.711	-2.72767	0	0	down	HSP90B1	heat shock protein 90 beta family member 1 [Source:HGNC Symbol;Acc:HGNC:12028]	GO:0006457;GO:0005524;GO:0051082;GO:0006950;GO:0005783;GO:0034663;GO:0005886;GO:0042470;GO:0005515;GO:0005829;GO:0005789;GO:0000166;GO:0015031;GO:0016020;GO:0005634;GO:0003723;GO:0048471;GO:0005925;GO:0005509;GO:0030496;GO:0006898;GO:0005576;GO:0005788;GO:0030970;GO:0070062;GO:0044267;GO:0031012;GO:0001666;GO:0030433;GO:0043066;GO:0002224;GO:0034976;GO:0036500;GO:0050750;GO:0043687;GO:0071682;GO:…	K09487-ko04141 Protein processing in endoplasmic reticulum;ko04151 PI3K-Akt signaling pathway;ko04621 NOD-like receptor signaling pathway;ko04915 Estrogen signaling pathway;ko04918 Thyroid hormone synthesis;ko04626 Plant-pathogen interaction;ko05200 Pathways in cancer;ko05215 Prostate cancer	KOG0020-Endoplasmic reticulum glucose-regulated protein (GRP94/endoplasmin), HSP90 family[O]
ENSG00000210135	80267.2	56141.5	0.515744	0	0	-	MT-TN	mitochondrially encoded tRNA asparagine [Source:HGNC Symbol;Acc:HGNC:7493]	-	-	-
ENSG00000196642	30.202	218.977	-2.85807	0	0	down	RABL6	RAB, member RAS oncogene family like 6 [Source:HGNC Symbol;Acc:HGNC:24703]	GO:0003924;GO:0005515;GO:0005525;GO:0000166;GO:0005737;GO:0005634;GO:0005622;GO:0007264	-	KOG0084-GTPase Rab1/YPT1, small G protein superfamily, and related GTP-binding proteins[TU]
ENSG00000228253	357.651	3223.99	-3.17222	0	0	down	MT-ATP8	mitochondrially encoded ATP synthase 8 [Source:HGNC Symbol;Acc:HGNC:7415]	GO:0005753;GO:0005739;GO:0055093;GO:0042407;GO:0006811;GO:0016021;GO:0016020;GO:0006810;GO:0015078;GO:0015992;GO:0015986;GO:0031966;GO:0000276;GO:0006754;GO:0016887;GO:0005743;GO:0022857;GO:0042776;GO:0045263	K02125-ko00190 Oxidative phosphorylation;ko05010 Alzheimer's disease;ko05012 Parkinson's disease;ko05016 Huntington's disease	-
ENSG00000198840	890.386	3457.27	-1.95713	0	0	down	MT-ND3	mitochondrially encoded NADH:ubiquinone oxidoreductase core subunit 3 [Source:HGNC Symbol;Acc:HGNC:7458]	GO:0005739;GO:0071385;GO:0009725;GO:0009642;GO:0006979;GO:0005515;GO:0055114;GO:0016491;GO:0016021;GO:0016020;GO:0070469;GO:0008137;GO:0031966;GO:0006120;GO:0032981;GO:0005747;GO:0005743	K03880-ko00190 Oxidative phosphorylation;ko05012 Parkinson's disease	KOG4662-NADH dehydrogenase subunit 3 and related proteins[C]
ENSG00000124942	24.0898	72.054	-1.58065	0	0	down	AHNAK	AHNAK nucleoprotein [Source:HGNC Symbol;Acc:HGNC:347]	GO:0005515;GO:0005886;GO:0005829;GO:0005765;GO:0016020;GO:0005737;GO:0005634;GO:0003723;GO:0045121;GO:0005925;GO:0045296;GO:0070062;GO:0042383;GO:0043484;GO:0031982;GO:1901385;GO:0051259;GO:0044548;GO:0015629;GO:0043034;GO:0030315;GO:0044291;GO:0097493	-	-
ENSG00000122566	15.8919	310.283	-4.28722	0	0	down	HNRNPA2B1	heterogeneous nuclear ribonucleoprotein A2/B1 [Source:HGNC Symbol;Acc:HGNC:5033]	GO:0005634;GO:0048025;GO:0000122;GO:0097157;GO:0003723;GO:0016070;GO:0005576;GO:0005681;GO:0006397;GO:0005515;GO:0030529;GO:0005654;GO:0016020;GO:0005737;GO:0051028;GO:0006810;GO:0008380;GO:0003676;GO:0006406;GO:0070062;GO:0000398;GO:0003730;GO:0000781;GO:0016363;GO:0015030;GO:0071013;GO:1990247;GO:0098505;GO:0035198;GO:0043047;GO:0031053;GO:0044806;GO:0050658;GO:1904358;GO:1905663;GO:1990428	-	KOG0118-FOG: RRM domain[R]
ENSG00000178209	168.823	337.366	-0.998804	0	0	-	PLEC	plectin [Source:HGNC Symbol;Acc:HGNC:9069]	GO:0008092;GO:0005515;GO:0005856;GO:0045111;GO:0005925;GO:0003779;GO:0005829;GO:0005737;GO:0003723;GO:0030054;GO:0045296;GO:0070062;GO:0042383;GO:0031012;GO:0005886;GO:0008307;GO:0030506;GO:0031581;GO:0030056;GO:0043034;GO:0016528;GO:0043292;GO:0005903	-	KOG0516-Dystonin, GAS (Growth-arrest-specific protein), and related proteins[Z]
ENSG00000142541	5956.25	4001.97	0.573695	0	0	-	RPL13A	ribosomal protein L13a [Source:HGNC Symbol;Acc:HGNC:10304]	GO:0005840;GO:0006412;GO:0003735;GO:0030529;GO:0016020;GO:0005737;GO:0005634;GO:0003723;GO:0015934;GO:0005925;GO:0005730;GO:0005829;GO:0006417;GO:0003729;GO:0071346;GO:0017148;GO:0006413;GO:0006364;GO:0000184;GO:0019083;GO:0097452;GO:0006614;GO:0022625;GO:1901194	K02872-ko03010 Ribosome	KOG3204-60S ribosomal protein L13a[J]
ENSG00000080824	25.0155	212.464	-3.08633	0	0	down	HSP90AA1	heat shock protein 90 alpha family class A member 1 [Source:HGNC Symbol;Acc:HGNC:5253]	GO:0097718;GO:0005737;GO:0042470;GO:0007165;GO:0005515;GO:0005886;GO:0042803;GO:0006457;GO:0005829;GO:0018108;GO:0005524;GO:0000166;GO:0016020;GO:0005634;GO:0003723;GO:0009409;GO:0051082;GO:0009408;GO:0006950;GO:0006898;GO:0038096;GO:0005576;GO:0042802;GO:0006986;GO:0070062;GO:0005654;GO:0050821;GO:0000086;GO:0097711;GO:0043312;GO:0016887;GO:0046677;GO:0034774;GO:1904813;GO:0050999;GO:0030911;GO:…	K04079-ko04141 Protein processing in endoplasmic reticulum;ko04151 PI3K-Akt signaling pathway;ko04621 NOD-like receptor signaling pathway;ko04612 Antigen processing and presentation;ko04915 Estrogen signaling pathway;ko04914 Progesterone-mediated oocyte maturation;ko04626 Plant-pathogen interaction;ko05200 Pathways in cancer;ko05215 Prostate cancer	KOG0019-Molecular chaperone (HSP90 family)[O]
ENSG00000072501	3.19623	50.08	-3.96979	0	0	down	SMC1A	structural maintenance of chromosomes 1A [Source:HGNC Symbol;Acc:HGNC:11111]	GO:0030893;GO:0008278;GO:0005634;GO:0072423;GO:0051321;GO:0019827;GO:0036033;GO:0032403;GO:0003682;GO:0005694;GO:0051276;GO:0005515;GO:0006281;GO:0051301;GO:0005654;GO:0005829;GO:0005524;GO:0000166;GO:0003723;GO:0007049;GO:0006974;GO:0000775;GO:0000776;GO:0000777;GO:0007064;GO:0007052;GO:0007062;GO:0046982;GO:0000794;GO:0009314;GO:0000070;GO:0032876	K06636-ko04110 Cell cycle;ko04111 Cell cycle - yeast;ko04113 Meiosis - yeast;ko04114 Oocyte meiosis	KOG0018-Structural maintenance of chromosome protein 1 (sister chromatid cohesion complex Cohesin, subunit SMC1)[D]
ENSG00000173432	5027.42	3063.78	0.714507	0	0	-	SAA1	serum amyloid A1 [Source:HGNC Symbol;Acc:HGNC:10513]	GO:0005576;GO:0005615;GO:0006898;GO:0042056;GO:0050918;GO:0008201;GO:0070062;GO:0044267;GO:0050728;GO:0045087;GO:0006953;GO:0034364;GO:0045785;GO:0001664;GO:0030593;GO:0007204;GO:0030168;GO:0071682;GO:0050708;GO:0050715;GO:0050716;GO:0000187;GO:0048246;GO:0048247;GO:0005881	-	-
ENSG00000210194	4488.01	16470.2	-1.87571	0	0	down	MT-TE	mitochondrially encoded tRNA glutamic acid [Source:HGNC Symbol;Acc:HGNC:7479]	-	-	-
ENSG00000111640	4292.86	3333.28	0.364996	0	0	-	GAPDH	glyceraldehyde-3-phosphate dehydrogenase [Source:HGNC Symbol;Acc:HGNC:4141]	GO:0097718;GO:0005737;GO:0051287;GO:0005515;GO:0005829;GO:0005886;GO:0030529;GO:0006096;GO:0031965;GO:0055114;GO:0050661;GO:0016491;GO:0016740;GO:0043231;GO:0016020;GO:0005634;GO:0006915;GO:0048471;GO:0005856;GO:0016620;GO:0008017;GO:0042802;GO:0004365;GO:0006006;GO:0015630;GO:0070062;GO:0006417;GO:0071346;GO:0050821;GO:0031012;GO:0017148;GO:0031982;GO:0000226;GO:0005811;GO:0006094;GO:0061621;GO:…	K00134-ko01200 Carbon metabolism;ko01230 Biosynthesis of amino acids;ko00010 Glycolysis / Gluconeogenesis;ko00710 Carbon fixation in photosynthetic organisms;ko04066 HIF-1 signaling pathway;ko05010 Alzheimer's disease	KOG0657-Glyceraldehyde 3-phosphate dehydrogenase[G]
ENSG00000112514	693.397	119.768	2.53343	0	0	up	CUTA	cutA divalent cation tolerance homolog [Source:HGNC Symbol;Acc:HGNC:21101]	GO:0005515;GO:0016020;GO:0005507;GO:0070062;GO:0010038;GO:0019899;GO:0008104;GO:0016021	-	KOG3338-Divalent cation tolerance-related protein[P]
ENSG00000198786	882.893	1731.97	-0.9721	0	0	-	MT-ND5	mitochondrially encoded NADH:ubiquinone oxidoreductase core subunit 5 [Source:HGNC Symbol;Acc:HGNC:7461]	GO:0043005;GO:0042542;GO:0010243;GO:0001666;GO:0005739;GO:0005743;GO:0055114;GO:0016491;GO:0016021;GO:0016020;GO:0070469;GO:0008137;GO:0042773;GO:0006120;GO:0032981;GO:0005747	K03883-ko00190 Oxidative phosphorylation;ko05012 Parkinson's disease	KOG4668-NADH dehydrogenase subunits 2, 5, and related proteins[C]
ENSG00000144136	8.4902	130.213	-3.93893	0	0	down	SLC20A1	solute carrier family 20 member 1 [Source:HGNC Symbol;Acc:HGNC:10946]	GO:0016021;GO:0005886;GO:0006817;GO:0006814;GO:0005316;GO:0035725;GO:0004871;GO:0055085;GO:0015293;GO:0016020;GO:0006810;GO:0007165;GO:0005315;GO:0035435;GO:0005887;GO:0043123;GO:0004872;GO:0006811;GO:0005436;GO:0006796;GO:0015321;GO:0044341	-	KOG2493-Na+/Pi symporter[P]
ENSG00000161203	12.3784	185.528	-3.90574	0	0	down	AP2M1	adaptor related protein complex 2 mu 1 subunit [Source:HGNC Symbol;Acc:HGNC:564]	GO:0032802;GO:0034383;GO:0005515;GO:0005886;GO:0030131;GO:0016192;GO:0015031;GO:0006886;GO:0006810;GO:0016020;GO:0005905;GO:0008289;GO:0005829;GO:0006897;GO:0070062;GO:0061024;GO:0060071;GO:0044325;GO:0007018;GO:0019886;GO:0005215;GO:0048013;GO:0030666;GO:0005765;GO:0036020;GO:0050690;GO:0030669;GO:0035615;GO:0072583;GO:0030122;GO:1903077;GO:0050750;GO:0005048;GO:0043195;GO:0005739;GO:0016185;GO:…	K11826-ko04144 Endocytosis;ko04961 Endocrine and other factor-regulated calcium reabsorption;ko04721 Synaptic vesicle cycle;ko05016 Huntington's disease	KOG0937-Adaptor complexes medium subunit family[U]
ENSG00000221983	2322.11	1310.03	0.825838	0	0	-	UBA52	ubiquitin A-52 residue ribosomal protein fusion product 1 [Source:HGNC Symbol;Acc:HGNC:12458]	GO:0005515;GO:0005886;GO:0005840;GO:0006412;GO:0003735;GO:0005765;GO:0030529;GO:0005654;GO:0005829;GO:0005783;GO:0005737;GO:0005634;GO:0044322;GO:0005615;GO:0038095;GO:0016567;GO:0005789;GO:0070062;GO:0034220;GO:0044267;GO:0061024;GO:0016197;GO:0019058;GO:0075733;GO:0010008;GO:0000165;GO:0000209;GO:0002223;GO:0010972;GO:0016579;GO:0031145;GO:0031146;GO:0033209;GO:0038061;GO:0043161;GO:0043488;GO:…	K02927-ko03010 Ribosome	KOG0003-Ubiquitin/60s ribosomal protein L40 fusion[J]
ENSG00000119335	21.7331	159.489	-2.87549	0	0	down	SET	SET nuclear proto-oncogene [Source:HGNC Symbol;Acc:HGNC:10760]	GO:0043086;GO:0005811;GO:0005515;GO:0050790;GO:0005829;GO:0006334;GO:0003677;GO:0005783;GO:0005654;GO:0005737;GO:0005634;GO:0048471;GO:0043488;GO:0016032;GO:0042393;GO:0045892;GO:0043234;GO:0006913;GO:0019888;GO:0006260;GO:0006337;GO:0043524;GO:0004864;GO:0035067	-	KOG1508-DNA replication factor/protein phosphatase inhibitor SET/SPR-2[L]
ENSG00000211459	4246.73	6793.11	-0.677722	0	0	-	MT-RNR1	mitochondrially encoded 12S RNA [Source:HGNC Symbol;Acc:HGNC:7470]	-	-	-
ENSG00000100075	12.6615	230.603	-4.18689	0	0	down	SLC25A1	solute carrier family 25 member 1 [Source:HGNC Symbol;Acc:HGNC:10979]	GO:0005743;GO:0005739;GO:0046949;GO:0055085;GO:0016021;GO:0016020;GO:0005634;GO:0006810;GO:0070062;GO:0006094;GO:0015137;GO:0015142;GO:0006843;GO:0035674	-	KOG0756-Mitochondrial tricarboxylate/dicarboxylate carrier proteins[C]
ENSG00000150093	5.09601	100.405	-4.30033	0	0	down	ITGB1	integrin subunit beta 1 [Source:HGNC Symbol;Acc:HGNC:6153]	GO:0042470;GO:0005515;GO:0005886;GO:0007155;GO:0046872;GO:0016021;GO:0016020;GO:0030054;GO:0004872;GO:0007160;GO:0007229;GO:0008305;GO:0005925;GO:0042995;GO:0050776;GO:0050900;GO:0046718;GO:0005768;GO:0043547;GO:0045296;GO:0005737;GO:0030027;GO:0070062;GO:0001968;GO:0042383;GO:0001726;GO:0055037;GO:0016032;GO:0009986;GO:0002020;GO:0032154;GO:0046982;GO:0030198;GO:0032403;GO:0016477;GO:0003779;GO:…	K05719-ko04015 Rap1 signaling pathway;ko04151 PI3K-Akt signaling pathway;ko04512 ECM-receptor interaction;ko04514 Cell adhesion molecules (CAMs);ko04145 Phagosome;ko04810 Regulation of actin cytoskeleton;ko04510 Focal adhesion;ko04611 Platelet activation;ko04670 Leukocyte transendothelial migration;ko04360 Axon guidance;ko05200 Pathways in cancer;ko05205 Proteoglycans in cancer;ko05222 Small cell…	KOG1226-Integrin beta subunit (N-terminal portion of extracellular region)[TW]
ENSG00000143933	5.1574	105.067	-4.34852	0	0	down	CALM2	calmodulin 2 [Source:HGNC Symbol;Acc:HGNC:1445]	GO:0043209;GO:0031966;GO:0030672;GO:0014069;GO:2000300;GO:1900242;GO:0090151;GO:0090150;GO:0005515;GO:0005509;GO:0016310;GO:0016301	K02183-ko04014 Ras signaling pathway;ko04015 Rap1 signaling pathway;ko04020 Calcium signaling pathway;ko04070 Phosphatidylinositol signaling system;ko04024 cAMP signaling pathway;ko04022 cGMP - PKG signaling pathway;ko04114 Oocyte meiosis;ko04910 Insulin signaling pathway;ko04922 Glucagon signaling pathway;ko04912 GnRH signaling pathway;ko04915 Estrogen signaling pathway;ko04921 Oxytocin signalin…	KOG0027-Calmodulin and related proteins (EF-Hand superfamily)[T]
ENSG00000040487	4.79516	154.324	-5.00824	0	0	down	PQLC2	PQ loop repeat containing 2 [Source:HGNC Symbol;Acc:HGNC:26001]	GO:0005765;GO:0043231;GO:0016021;GO:0016020;GO:0006810;GO:1990822;GO:0005764;GO:1903826;GO:0055085;GO:0031301;GO:0006865;GO:0015809;GO:0015174;GO:0015181;GO:0015189;GO:0015819;GO:0080144;GO:1903401	-	KOG2913-Predicted membrane protein[S]
ENSG00000151914	3.65585	48.4744	-3.72894	0	0	down	DST	dystonin [Source:HGNC Symbol;Acc:HGNC:1090]	GO:0005882;GO:0008092;GO:0005515;GO:0005856;GO:0015630;GO:0005886;GO:1904115;GO:0003779;GO:0007155;GO:0005509;GO:0005789;GO:0005783;GO:0005829;GO:0005634;GO:0046872;GO:0016021;GO:0016020;GO:0005737;GO:0008017;GO:0030054;GO:0005874;GO:0007229;GO:0005925;GO:0042995;GO:0007010;GO:0030424;GO:0031252;GO:0070062;GO:0005938;GO:0008022;GO:0009925;GO:0030018;GO:0005635;GO:0031410;GO:0045104;GO:0005178;GO:…	-	-
ENSG00000034510	33766.5	30535.7	0.145096	0	0	-	TMSB10	thymosin beta 10 [Source:HGNC Symbol;Acc:HGNC:11879]	GO:0005515;GO:0003779;GO:0007015;GO:0005737;GO:0005856;GO:0003785	-	KOG4794-Thymosin beta[N]
ENSG00000160949	8.3309	65.138	-2.96695	0	0	down	TONSL	tonsoku like, DNA repair protein [Source:HGNC Symbol;Acc:HGNC:7801]	GO:0016604;GO:0005515;GO:0005654;GO:0005737;GO:0005634;GO:0006281;GO:0006974;GO:1903507;GO:0031297;GO:0042393;GO:0042994;GO:0003714;GO:0000724;GO:0005662;GO:0042555;GO:0043596;GO:0035101	-	KOG0504-FOG: Ankyrin repeat[R]
ENSG00000185043	309.332	40.0246	2.9502	0	0	up	CIB1	calcium and integrin binding 1 [Source:HGNC Symbol;Acc:HGNC:16920]	GO:0005515;GO:0005886;GO:0051301;GO:0005794;GO:0007155;GO:0005509;GO:0005654;GO:0046872;GO:0016020;GO:0005737;GO:0005634;GO:0006915;GO:0007049;GO:0048471;GO:0030154;GO:0005856;GO:0071901;GO:0007283;GO:0042995;GO:0005813;GO:0005815;GO:0030027;GO:0030426;GO:0070062;GO:0001934;GO:0071944;GO:0042383;GO:0008285;GO:0030335;GO:0090314;GO:0071356;GO:0006469;GO:0008284;GO:0042127;GO:0043005;GO:0043066;GO:…	-	KOG0034-Ca2+/calmodulin-dependent protein phosphatase (calcineurin subunit B), EF-Hand superfamily protein[T]
ENSG00000197136	2.68921	48.9301	-4.18547	0	0	down	PCNX3	pecanex homolog 3 (Drosophila) [Source:HGNC Symbol;Acc:HGNC:18760]	GO:0016021;GO:0016020	-	KOG3604-Pecanex[S]
ENSG00000129103	182.206	30.0052	2.60229	0	0	up	SUMF2	sulfatase modifying factor 2 [Source:HGNC Symbol;Acc:HGNC:20415]	GO:0005783;GO:0042803;GO:0046872;GO:0005788;GO:0043687	-	-
ENSG00000123146	145.614	26.7903	2.44237	0	0	up	ADGRE5	adhesion G protein-coupled receptor E5 [Source:HGNC Symbol;Acc:HGNC:1711]	GO:0005576;GO:0007165;GO:0004871;GO:0005886;GO:0007155;GO:0005509;GO:0007186;GO:0004930;GO:0016020;GO:0016021;GO:0004888;GO:0007166;GO:0005615;GO:0005925;GO:0005515;GO:0070062;GO:0005887;GO:0043312;GO:0006954;GO:0006955;GO:0007267;GO:0030667;GO:0006928	-	KOG4193-G protein-coupled receptors[T]
ENSG00000177239	17.8229	94.7361	-2.41018	0	0	down	MAN1B1	mannosidase alpha class 1B member 1 [Source:HGNC Symbol;Acc:HGNC:6823]	GO:0030433;GO:0004571;GO:0016798;GO:0008152;GO:0005509;GO:0016787;GO:0005789;GO:0005783;GO:0046872;GO:0016020;GO:0016021;GO:0006486;GO:1903561;GO:0004559;GO:0000139;GO:0005794;GO:0006491;GO:0009311;GO:0044322;GO:1904382;GO:0036509;GO:0036510;GO:0036511;GO:0036512;GO:0036508;GO:1904380	K01230-ko00510 N-Glycan biosynthesis;ko00513 Various types of N-glycan biosynthesis;ko04141 Protein processing in endoplasmic reticulum	KOG2431-1, 2-alpha-mannosidase[G]
ENSG00000108342	344.697	104.86	1.71686	0	0	up	CSF3	colony stimulating factor 3 [Source:HGNC Symbol;Acc:HGNC:2438]	GO:0006955;GO:0005576;GO:0005125;GO:0008083;GO:0005615;GO:0014068;GO:0033138;GO:0045944;GO:0050731;GO:0051897;GO:0071345;GO:2000251;GO:0030838;GO:0019899;GO:0007275;GO:0032092;GO:0019221;GO:0008284;GO:0042993;GO:0005130;GO:0030851;GO:0045639;GO:1901215;GO:0071222;GO:0045471	K05423-ko04630 Jak-STAT signaling pathway;ko04151 PI3K-Akt signaling pathway;ko04060 Cytokine-cytokine receptor interaction;ko04640 Hematopoietic cell lineage;ko05144 Malaria	-
ENSG00000181029	12.9906	172.931	-3.73465	0	0	down	TRAPPC5	trafficking protein particle complex 5 [Source:HGNC Symbol;Acc:HGNC:23067]	GO:0048193;GO:0030008;GO:0005515;GO:0043547;GO:0005794;GO:0005783;GO:0006810;GO:0000139;GO:0016192;GO:0005829;GO:0017112;GO:0061024;GO:0048208	-	KOG3315-Transport protein particle (TRAPP) complex subunit[U]
ENSG00000126777	0.536577	80.8393	-7.23513	0	0	down	KTN1	kinectin 1 [Source:HGNC Symbol;Acc:HGNC:6467]	GO:0007018;GO:0019894;GO:0005515;GO:0005789;GO:0005783;GO:0016021;GO:0016020;GO:0003723;GO:0045296;GO:0044267;GO:0005887;GO:0005788;GO:0043687;GO:0015031;GO:0030176	-	-
ENSG00000198563	420.334	64.197	2.71096	0	0	up	DDX39B	DExD-box helicase 39B [Source:HGNC Symbol;Acc:HGNC:13917]	GO:0005524;GO:0016607;GO:0003676;GO:0005681;GO:0005515;GO:0004386;GO:0016787;GO:0000166;GO:0005737;GO:0005634;GO:0051028;GO:0006810;GO:0008380;GO:0006397;GO:0003723;GO:0006406;GO:0042802;GO:0005654;GO:0016887;GO:0000398;GO:0006369;GO:0006405;GO:0031124;GO:0032786;GO:0004004;GO:0000346;GO:0008186;GO:0046784;GO:2000002;GO:0005687;GO:0005688;GO:0017070;GO:0030621;GO:0043008;GO:0000245;GO:0010501;GO:…	K12812-ko03040 Spliceosome;ko03013 RNA transport;ko03015 mRNA surveillance pathway;ko05164 Influenza A	KOG0329-ATP-dependent RNA helicase[A]
ENSG00000130313	512.474	132.53	1.95116	0	0	up	PGLS	6-phosphogluconolactonase [Source:HGNC Symbol;Acc:HGNC:8903]	GO:0005515;GO:0005975;GO:0016787;GO:0005737;GO:0017057;GO:0006098;GO:0005829;GO:0070062;GO:0009051	K01057-ko01200 Carbon metabolism;ko00030 Pentose phosphate pathway	KOG3147-6-phosphogluconolactonase - like protein[G]
ENSG00000174996	8.23613	112.978	-3.77794	0	0	down	KLC2	kinesin light chain 2 [Source:HGNC Symbol;Acc:HGNC:20716]	GO:0005871;GO:0003777;GO:0016020;GO:0005737;GO:0005856;GO:0005874;GO:0005829;GO:0045296;GO:0006890;GO:0005515;GO:0007018;GO:0019886;GO:0019894;GO:0043234;GO:0016938	K10407-ko05132 Salmonella infection	KOG1840-Kinesin light chain[Z]
ENSG00000111667	5.29011	99.5105	-4.23348	0	0	down	USP5	ubiquitin specific peptidase 5 [Source:HGNC Symbol;Acc:HGNC:12628]	GO:0006508;GO:0008234;GO:0008233;GO:0005515;GO:0016787;GO:0016579;GO:0004843;GO:0046872;GO:0008270;GO:0036459;GO:0006511;GO:0016567;GO:0005829;GO:0071108;GO:0005764;GO:0004197;GO:0032436;GO:0043130	-	KOG0944-Ubiquitin-specific protease UBP14[O]
ENSG00000198938	3177.71	2059.97	0.625365	0	0	-	MT-CO3	mitochondrially encoded cytochrome c oxidase III [Source:HGNC Symbol;Acc:HGNC:7422]	GO:0005739;GO:1902600;GO:0005515;GO:0005743;GO:0016020;GO:0016021;GO:0022904;GO:0004129;GO:0006123;GO:0045277;GO:0015002;GO:0008535;GO:0019646	K02262-ko00190 Oxidative phosphorylation;ko04260 Cardiac muscle contraction;ko05010 Alzheimer's disease;ko05012 Parkinson's disease;ko05016 Huntington's disease;ko04932 Non-alcoholic fatty liver disease (NAFLD)	KOG4664-Cytochrome oxidase subunit III and related proteins[C]
ENSG00000002822	27.8411	125.675	-2.1744	0	0	down	MAD1L1	MAD1 mitotic arrest deficient like 1 [Source:HGNC Symbol;Acc:HGNC:6762]	GO:0005515;GO:0015629;GO:0005694;GO:0051301;GO:0005829;GO:0005634;GO:0005737;GO:0007049;GO:0005856;GO:0005643;GO:0005813;GO:0005815;GO:0005819;GO:0000775;GO:0000776;GO:0000777;GO:0007094;GO:0007062;GO:0007093;GO:0072686;GO:0051315;GO:0090235;GO:0000922;GO:1901990;GO:0048538;GO:0042130	K06638-ko04110 Cell cycle;ko04914 Progesterone-mediated oocyte maturation;ko05203 Viral carcinogenesis	KOG4593-Mitotic checkpoint protein MAD1[D]
ENSG00000101335	4.1793	215.462	-5.68803	0	0	down	MYL9	myosin light chain 9 [Source:HGNC Symbol;Acc:HGNC:15754]	GO:0030018;GO:0016460;GO:0001725;GO:0032036;GO:0016459;GO:0005509;GO:0046872;GO:0005829;GO:0070527;GO:0006936;GO:0008307;GO:0006937;GO:0005859	K12755-ko04024 cAMP signaling pathway;ko04022 cGMP - PKG signaling pathway;ko04810 Regulation of actin cytoskeleton;ko04510 Focal adhesion;ko04530 Tight junction;ko04670 Leukocyte transendothelial migration;ko04921 Oxytocin signaling pathway;ko04270 Vascular smooth muscle contraction	KOG0031-Myosin regulatory light chain, EF-Hand protein superfamily[Z]
ENSG00000185298	1.16575	116.662	-6.64493	0	0	down	CCDC137	coiled-coil domain containing 137 [Source:HGNC Symbol;Acc:HGNC:33451]	GO:0005515;GO:0005694;GO:0001650;GO:0005730;GO:0003723	-	-
ENSG00000136942	9143.42	6869.02	0.41263	0	0	-	RPL35	ribosomal protein L35 [Source:HGNC Symbol;Acc:HGNC:10344]	GO:0005840;GO:0006412;GO:0003735;GO:0005622;GO:0030529;GO:0016020;GO:0003723;GO:0005829;GO:0006413;GO:0006364;GO:0005730;GO:0000184;GO:0019083;GO:0006614;GO:0022625;GO:0003729;GO:0000463	K02918-ko03010 Ribosome	KOG3436-60S ribosomal protein L35[J]
ENSG00000204356	310.964	79.7764	1.96271	0	0	up	NELFE	negative elongation factor complex member E [Source:HGNC Symbol;Acc:HGNC:13974]	GO:0005634;GO:0070374;GO:0051571;GO:0045944;GO:0034244;GO:0000122;GO:0003682;GO:0016604;GO:0005515;GO:0005886;GO:0006355;GO:0006351;GO:0005654;GO:0003723;GO:0003676;GO:0032021;GO:0008150;GO:0006366;GO:0006368;GO:0050434;GO:1900364	-	-
ENSG00000063177	4045.46	2689.37	0.589035	0	0	-	RPL18	ribosomal protein L18 [Source:HGNC Symbol;Acc:HGNC:10310]	GO:0005840;GO:0006412;GO:0003735;GO:0005622;GO:0030529;GO:0005829;GO:0005730;GO:0005783;GO:0016020;GO:0005737;GO:0005634;GO:0005925;GO:0006413;GO:0003723;GO:0006364;GO:0000184;GO:0019083;GO:0006614;GO:0022625	K02883-ko03010 Ribosome	KOG1714-60s ribosomal protein L18[J]
ENSG00000111716	44.6954	293.162	-2.7135	0	0	down	LDHB	lactate dehydrogenase B [Source:HGNC Symbol;Acc:HGNC:6541]	GO:0043209;GO:0005739;GO:0019674;GO:0006089;GO:0051287;GO:0042802;GO:0019900;GO:0004459;GO:0004457;GO:0005515;GO:0016616;GO:0005975;GO:0003824;GO:0055114;GO:0016491;GO:0005829;GO:0016020;GO:0005737;GO:0019752;GO:0045121;GO:0070062;GO:0006090	K00016-ko00010 Glycolysis / Gluconeogenesis;ko00620 Pyruvate metabolism;ko00640 Propanoate metabolism;ko00270 Cysteine and methionine metabolism;ko04922 Glucagon signaling pathway	KOG1495-Lactate dehydrogenase[C]
ENSG00000051523	3953.24	2810.73	0.492092	0	0	-	CYBA	cytochrome b-245 alpha chain [Source:HGNC Symbol;Acc:HGNC:2577]	GO:0097038;GO:0043025;GO:0043020;GO:0030425;GO:0016324;GO:0005925;GO:0005794;GO:0005768;GO:0005739;GO:0005737;GO:0005634;GO:0001725;GO:1904845;GO:1904385;GO:1904044;GO:0072593;GO:0071480;GO:0071407;GO:0071356;GO:0071333;GO:0071310;GO:0071260;GO:0071230;GO:0070555;GO:0070257;GO:0055114;GO:0051279;GO:0050665;GO:0048661;GO:0042554;GO:0042493;GO:0033864;GO:0032930;GO:0031667;GO:0030307;GO:0014895;GO:…	K08009-ko04145 Phagosome;ko04670 Leukocyte transendothelial migration;ko04380 Osteoclast differentiation;ko05140 Leishmaniasis	-
ENSG00000070756	23.2517	103.573	-2.15524	0	0	down	PABPC1	poly(A) binding protein cytoplasmic 1 [Source:HGNC Symbol;Acc:HGNC:8554]	GO:0030425;GO:1990124;GO:0005737;GO:1900153;GO:0060213;GO:0031047;GO:0003729;GO:0003723;GO:0005515;GO:0005681;GO:0030529;GO:0005829;GO:0016020;GO:0005634;GO:0008380;GO:0006397;GO:0003676;GO:0005925;GO:0070062;GO:2000623;GO:0043488;GO:0000289;GO:0008022;GO:0010494;GO:0000398;GO:0006413;GO:0003730;GO:0008143;GO:0036464;GO:0000184;GO:0071013;GO:0045070;GO:0006378;GO:0008266;GO:0008494;GO:0045727;GO:…	K13126-ko03013 RNA transport;ko03015 mRNA surveillance pathway;ko03018 RNA degradation	KOG0123-Polyadenylate-binding protein (RRM superfamily)[AJ]
ENSG00000127022	18.7328	118.283	-2.6586	0	0	down	CANX	calnexin [Source:HGNC Symbol;Acc:HGNC:1473]	GO:0005783;GO:0006457;GO:0005509;GO:0051082;GO:0042470;GO:0005515;GO:0030246;GO:0005789;GO:0046872;GO:0016021;GO:0016020;GO:0003723;GO:0070062;GO:0031012;GO:0019886;GO:0072583;GO:0005788;GO:0002474;GO:0071556;GO:0048488;GO:0044233;GO:0009306;GO:0034975;GO:0043234;GO:0043209;GO:0043197;GO:0043025;GO:0032839;GO:0030424;GO:0005840;GO:0005791;GO:0005790;GO:0005737;GO:0061077;GO:0007568;GO:0035255;GO:…	K08054-ko04141 Protein processing in endoplasmic reticulum;ko04145 Phagosome;ko04612 Antigen processing and presentation;ko04918 Thyroid hormone synthesis;ko05166 HTLV-I infection	KOG0675-Calnexin[O]
ENSG00000175061	77.3282	409.199	-2.40374	0	0	down	LRRC75A-AS1	LRRC75A antisense RNA 1 [Source:HGNC Symbol;Acc:HGNC:28619]	-	-	-
ENSG00000119707	1.89175	54.0138	-4.83553	0	0	down	RBM25	RNA binding motif protein 25 [Source:HGNC Symbol;Acc:HGNC:23244]	GO:0006397;GO:0016607;GO:0005737;GO:0005634;GO:0008380;GO:0003723;GO:0003676;GO:0003729;GO:0005515;GO:0005681;GO:0042981;GO:0000381	K12822-ko03040 Spliceosome	KOG2253-U1 snRNP complex, subunit SNU71 and related PWI-motif proteins[A]
ENSG00000198886	1080.82	1956.28	-0.855992	0	0	-	MT-ND4	mitochondrially encoded NADH:ubiquinone oxidoreductase core subunit 4 [Source:HGNC Symbol;Acc:HGNC:7459]	GO:0005739;GO:0045471;GO:0035094;GO:0021549;GO:0007568;GO:0001701;GO:0001666;GO:0055114;GO:0016491;GO:0016021;GO:0016020;GO:0070469;GO:0008137;GO:0006120;GO:0031966;GO:0042773;GO:0032981;GO:0005747;GO:0005743	K03881-ko00190 Oxidative phosphorylation;ko05012 Parkinson's disease	KOG4845-NADH dehydrogenase, subunit 4[C]
ENSG00000163597	74.3015	10.4468	2.83032	0	0	up	SNHG16	small nucleolar RNA host gene 16 [Source:HGNC Symbol;Acc:HGNC:44352]	-	-	-
ENSG00000130713	7.59675	104.829	-3.78651	0	0	down	EXOSC2	exosome component 2 [Source:HGNC Symbol;Acc:HGNC:17097]	GO:0005515;GO:0005730;GO:0005634;GO:0005737;GO:0003723;GO:0006364;GO:0005829;GO:0000178;GO:0043488;GO:0005654;GO:0000467;GO:0030307;GO:0043928;GO:0008312;GO:0000175;GO:0034427;GO:0034475;GO:0071034;GO:0071035;GO:0071038;GO:0071049;GO:0071051;GO:0000176;GO:0000177	K03679-ko03018 RNA degradation	KOG3013-Exosomal 3'-5' exoribonuclease complex, subunit Rrp4[A]
ENSG00000271383	2.65208	22.9506	-3.11334	0	0	down	NBPF19	NBPF member 19 [Source:HGNC Symbol;Acc:HGNC:31999]	GO:0005737	-	-
ENSG00000167815	271.067	30.758	3.13961	0	0	up	PRDX2	peroxiredoxin 2 [Source:HGNC Symbol;Acc:HGNC:9353]	GO:0005623;GO:0045454;GO:0055114;GO:0016491;GO:0016209;GO:0008379;GO:0019430;GO:0034599;GO:0005737;GO:0004601;GO:0051920;GO:0005829;GO:0070062;GO:0042981;GO:0043066;GO:0006979;GO:0042744	K03386-ko04214 Apoptosis - fly	KOG0852-Alkyl hydroperoxide reductase, thiol specific antioxidant and related enzymes[O]
ENSG00000100345	64.4635	152.308	-1.24043	0	0	down	MYH9	myosin heavy chain 9 [Source:HGNC Symbol;Acc:HGNC:7579]	GO:0031594;GO:0030863;GO:0016460;GO:0005938;GO:0016459;GO:0005913;GO:0005925;GO:0005886;GO:0005903;GO:0005819;GO:0001931;GO:0005737;GO:0001772;GO:0001725;GO:1903923;GO:1903919;GO:0051295;GO:0016337;GO:0032796;GO:0008360;GO:0007520;GO:0007155;GO:0006911;GO:0001768;GO:0001701;GO:0000904;GO:0000212;GO:0019904;GO:0005515;GO:0042803;GO:0005829;GO:0003779;GO:0003774;GO:0005524;GO:0000166;GO:0015031;GO:…	K10352-ko04530 Tight junction	KOG0161-Myosin class II heavy chain[Z]
ENSG00000140988	2012.46	1058.13	0.927446	0	0	-	RPS2	ribosomal protein S2 [Source:HGNC Symbol;Acc:HGNC:10404]	GO:0005515;GO:0015935;GO:0005840;GO:0006412;GO:0003735;GO:0030529;GO:0016020;GO:0005634;GO:0003723;GO:0022627;GO:0005654;GO:0005925;GO:0003729;GO:0005829;GO:0045296;GO:0070062;GO:0019899;GO:0006413;GO:0006364;GO:0000184;GO:0019083;GO:0006479;GO:0006614;GO:0017134;GO:0051347	K02981-ko03010 Ribosome	KOG0877-40S ribosomal protein S2/30S ribosomal protein S5[J]
ENSG00000175416	608.44	239.461	1.34532	0	0	up	CLTB	clathrin light chain B [Source:HGNC Symbol;Acc:HGNC:2091]	GO:0060170;GO:0030118;GO:0005886;GO:0005802;GO:0042277;GO:0005198;GO:0005829;GO:0043231;GO:0016192;GO:0006886;GO:0016020;GO:0005905;GO:0030130;GO:0030132;GO:0030659;GO:0031410;GO:0005515;GO:0061024;GO:0072583;GO:0030125;GO:0032050	K04645-ko04144 Endocytosis;ko04142 Lysosome;ko04961 Endocrine and other factor-regulated calcium reabsorption;ko04721 Synaptic vesicle cycle;ko05016 Huntington's disease;ko05100 Bacterial invasion of epithelial cells	KOG4031-Vesicle coat protein clathrin, light chain[U]
ENSG00000254772	1569.95	1233.46	0.348011	0	0	-	EEF1G	eukaryotic translation elongation factor 1 gamma [Source:HGNC Symbol;Acc:HGNC:3213]	GO:0005515;GO:0005783;GO:0006412;GO:0016020;GO:0005737;GO:0005634;GO:0003746;GO:0006414;GO:0005829;GO:0045296;GO:0070062;GO:0009615	K03233-ko05134 Legionellosis	KOG0867-Glutathione S-transferase[O]
ENSG00000117724	3.23441	27.098	-3.06661	0	0	down	CENPF	centromere protein F [Source:HGNC Symbol;Acc:HGNC:1857]	GO:0097539;GO:0045120;GO:0036064;GO:0005930;GO:0005813;GO:0005634;GO:0016202;GO:0042803;GO:0005515;GO:0008134;GO:0005694;GO:0051301;GO:0005654;GO:0015031;GO:0005737;GO:0007275;GO:0007049;GO:0048471;GO:0030154;GO:0005856;GO:0000922;GO:0005819;GO:0030496;GO:0007059;GO:0000775;GO:0000776;GO:0000777;GO:0005829;GO:0003682;GO:0008283;GO:0070840;GO:0007517;GO:0008022;GO:0071897;GO:0007062;GO:0045892;GO:…	-	-
ENSG00000074800	1183.25	830.634	0.510466	0	0	-	ENO1	enolase 1 [Source:HGNC Symbol;Acc:HGNC:3350]	GO:0099738;GO:0009986;GO:0000015;GO:2001171;GO:1903298;GO:0061621;GO:0045933;GO:0010756;GO:0004634;GO:0001078;GO:0016020;GO:0000122;GO:0042803;GO:0005737;GO:0005634;GO:0005515;GO:0005886;GO:0005829;GO:0006355;GO:0006351;GO:0003677;GO:0006096;GO:0016829;GO:0046872;GO:0000287;GO:0003723;GO:0005615;GO:0045296;GO:0070062;GO:0009615;GO:0031430;GO:0030308;GO:0045892;GO:0006094;GO:0051020	K01689-ko01200 Carbon metabolism;ko01230 Biosynthesis of amino acids;ko00010 Glycolysis / Gluconeogenesis;ko00680 Methane metabolism;ko03018 RNA degradation;ko04066 HIF-1 signaling pathway	KOG2670-Enolase[G]
ENSG00000105640	5734.08	4333.57	0.404005	0	0	-	RPL18A	ribosomal protein L18a [Source:HGNC Symbol;Acc:HGNC:10311]	GO:0005840;GO:0006412;GO:0003735;GO:0030529;GO:0016020;GO:0003723;GO:0005829;GO:0005515;GO:0006413;GO:0006364;GO:0000184;GO:0019083;GO:0006614;GO:0022625	K02882-ko03010 Ribosome	KOG0829-60S ribosomal protein L18A[J]
ENSG00000177697	837.037	477.245	0.810562	0	0	-	CD151	CD151 molecule (Raph blood group) [Source:HGNC Symbol;Acc:HGNC:1630]	GO:0042098;GO:0016477;GO:0005515;GO:0016021;GO:0016020;GO:0005925;GO:0005886;GO:0005829;GO:0007166;GO:0005887;GO:0007155;GO:0005178;GO:0005604;GO:0031581	-	KOG3882-Tetraspanin family integral membrane protein[R]
ENSG00000276045	97.1002	4.06644	4.57764	0	0	up	ORAI1	ORAI calcium release-activated calcium modulator 1 [Source:HGNC Symbol;Acc:HGNC:25896]	GO:0043234;GO:0016323;GO:0016020;GO:0070509;GO:0061180;GO:0002115;GO:0016021	-	-
ENSG00000168028	2803.63	2345.36	0.257487	0	0	-	RPSA	ribosomal protein SA [Source:HGNC Symbol;Acc:HGNC:6502]	GO:0005515;GO:0015935;GO:0005886;GO:0005840;GO:0006412;GO:0003735;GO:0005622;GO:0030529;GO:0007155;GO:0016020;GO:0005737;GO:0005634;GO:0003723;GO:0005055;GO:0043236;GO:0000028;GO:0022627;GO:0043022;GO:0046718;GO:0005829;GO:0070062;GO:0005654;GO:0016032;GO:0006413;GO:0006364;GO:0001618;GO:0030686;GO:0000184;GO:0019083;GO:0006614;GO:0000447;GO:0000461;GO:0006407;GO:0043025;GO:0031012;GO:0030855;GO:…	K02998-ko03010 Ribosome	KOG0830-40S ribosomal protein SA (P40)/Laminin receptor 1[J]
ENSG00000283293	3940.84	7241.97	-0.877878	0	0	-	RN7SK	RNA, 7SK small nuclear [Source:HGNC Symbol;Acc:HGNC:10037]	-	-	-
ENSG00000169738	519.88	87.5435	2.57011	0	0	up	DCXR	dicarbonyl and L-xylulose reductase [Source:HGNC Symbol;Acc:HGNC:18985]	GO:0055114;GO:0016491;GO:0005903;GO:0005902;GO:0051289;GO:0006739;GO:0006006;GO:0005997;GO:0050038;GO:0016614;GO:0016020;GO:0005634;GO:0005975;GO:0005886;GO:0042802;GO:0070062;GO:0005881;GO:0019640;GO:0042732;GO:0016655	K03331-ko00040 Pentose and glucuronate interconversions	KOG1207-Diacetyl reductase/L-xylulose reductase[Q]
ENSG00000166441	3828.2	2464.26	0.635513	0	0	-	RPL27A	ribosomal protein L27a [Source:HGNC Symbol;Acc:HGNC:10329]	GO:0005840;GO:0006412;GO:0003735;GO:0005622;GO:0030529;GO:0005829;GO:0005783;GO:0005515;GO:0016020;GO:0003723;GO:0015934;GO:0006413;GO:0006364;GO:0000184;GO:0019083;GO:0006614;GO:0022625	K02900-ko03010 Ribosome	KOG1742-60s ribosomal protein L15/L27[J]
ENSG00000170275	33.0003	2.30659	3.83865	0	0	up	CRTAP	cartilage associated protein [Source:HGNC Symbol;Acc:HGNC:2379]	GO:0005783;GO:0018400;GO:0007283;GO:0005576;GO:0005578;GO:0005615;GO:0050821;GO:0032403;GO:0005788;GO:0061077;GO:1901874;GO:0032991	-	-
ENSG00000141753	1814.24	1409.22	0.364471	0	0	-	IGFBP4	insulin like growth factor binding protein 4 [Source:HGNC Symbol;Acc:HGNC:5473]	GO:0005615;GO:0044342;GO:0043568;GO:0043410;GO:0040008;GO:0010906;GO:0006954;GO:0001558;GO:0005520;GO:0005576;GO:0044267;GO:0006259;GO:0007165;GO:0001501;GO:0008283;GO:0019838;GO:0005788;GO:0090090;GO:0043687;GO:0005102;GO:0043567;GO:0031995;GO:0031994	-	-
ENSG00000175482	161.918	6.2957	4.68475	0	0	up	POLD4	DNA polymerase delta 4, accessory subunit [Source:HGNC Symbol;Acc:HGNC:14106]	GO:0005515;GO:0005739;GO:0005829;GO:0005730;GO:0005634;GO:0006281;GO:0006974;GO:0006260;GO:0003887;GO:0000731;GO:0006261;GO:0043625;GO:0005654;GO:0019985;GO:0006283;GO:0042769;GO:0006296;GO:0033683;GO:0000722;GO:0006297;GO:0000723;GO:0006266;GO:0006298	K03505-ko00230 Purine metabolism;ko00240 Pyrimidine metabolism;ko03030 DNA replication;ko03410 Base excision repair;ko03420 Nucleotide excision repair;ko03430 Mismatch repair;ko03440 Homologous recombination;ko05166 HTLV-I infection	-
ENSG00000198925	38.3888	2.20838	4.11963	0	0	up	ATG9A	autophagy related 9A [Source:HGNC Symbol;Acc:HGNC:22408]	GO:0016021;GO:0016020;GO:0005794;GO:0015031;GO:0006810;GO:0030659;GO:0031410;GO:0006914;GO:0005515;GO:0005789;GO:0005783;GO:0043231;GO:0005768;GO:0031902;GO:0005802;GO:0005776;GO:0000045;GO:0000422;GO:0055037;GO:0005770;GO:0000407;GO:0034497;GO:0034727;GO:0044805;GO:0031667	-	KOG2173-Integral membrane protein[R]
ENSG00000101150	8.81714	106.736	-3.59759	0	0	down	TPD52L2	tumor protein D52 like 2 [Source:HGNC Symbol;Acc:HGNC:12007]	GO:0003723;GO:0005515	-	-
ENSG00000245532	2.8586	18.5158	-2.69537	0	0	down	NEAT1	nuclear paraspeckle assembly transcript 1 (non-protein coding) [Source:HGNC Symbol;Acc:HGNC:30815]	-	-	-
ENSG00000083845	2852.63	1928.02	0.565172	0	0	-	RPS5	ribosomal protein S5 [Source:HGNC Symbol;Acc:HGNC:10426]	GO:0015935;GO:0005840;GO:0006412;GO:0003735;GO:0030529;GO:0006413;GO:0016020;GO:0003723;GO:0022627;GO:0005925;GO:0003729;GO:0005829;GO:0070062;GO:0005654;GO:0031012;GO:0005515;GO:0006364;GO:0000184;GO:0019083;GO:0006614;GO:0006450	K02989-ko03010 Ribosome	KOG3291-Ribosomal protein S7[J]
ENSG00000110717	1125.24	419.698	1.42281	0	0	up	NDUFS8	NADH:ubiquinone oxidoreductase core subunit S8 [Source:HGNC Symbol;Acc:HGNC:7715]	GO:0005739;GO:0055114;GO:0016491;GO:0046872;GO:0016020;GO:0070469;GO:0016651;GO:0051536;GO:0051539;GO:0032981;GO:0005759;GO:0008137;GO:0003954;GO:0006120;GO:0006979;GO:0005747	K03941-ko00190 Oxidative phosphorylation;ko05010 Alzheimer's disease;ko05012 Parkinson's disease;ko05016 Huntington's disease;ko04932 Non-alcoholic fatty liver disease (NAFLD)	KOG3256-NADH:ubiquinone oxidoreductase, NDUFS8/23 kDa subunit[C]
ENSG00000011304	89.0699	17.7746	2.32512	0	0	up	PTBP1	polypyrimidine tract binding protein 1 [Source:HGNC Symbol;Acc:HGNC:9583]	GO:0016070;GO:0006397;GO:0005515;GO:0016020;GO:0005634;GO:0008380;GO:0003723;GO:0003676;GO:0070062;GO:0005654;GO:0075522;GO:0000381;GO:0048025;GO:0005730;GO:0000398;GO:0008543;GO:0033119;GO:0036002;GO:0008187;GO:0051148	-	KOG1190-Polypyrimidine tract-binding protein[A]
ENSG00000117523	8.66467	44.5161	-2.36111	0	0	down	PRRC2C	proline rich coiled-coil 2C [Source:HGNC Symbol;Acc:HGNC:24903]	GO:0002244;GO:0016020;GO:0003723;GO:0008022	-	-
ENSG00000175166	116.378	44.8659	1.37513	0	0	up	PSMD2	proteasome 26S subunit, non-ATPase 2 [Source:HGNC Symbol;Acc:HGNC:9559]	GO:0022624;GO:0005838;GO:0000502;GO:0005515;GO:0016020;GO:0038095;GO:0005576;GO:0030234;GO:0042176;GO:0005829;GO:0070062;GO:0000165;GO:0000209;GO:0002223;GO:0002479;GO:0006521;GO:0010972;GO:0016579;GO:0031145;GO:0031146;GO:0033209;GO:0038061;GO:0043161;GO:0043488;GO:0050852;GO:0051437;GO:0055085;GO:0060071;GO:0061418;GO:0090090;GO:0090263;GO:0005654;GO:0043312;GO:0051436;GO:0034774;GO:1904813;GO:…	K03028-ko03050 Proteasome;ko05169 Epstein-Barr virus infection	KOG2005-26S proteasome regulatory complex, subunit RPN1/PSMD2[O]
ENSG00000170759	4.62823	45.661	-3.30243	0	0	down	KIF5B	kinesin family member 5B [Source:HGNC Symbol;Acc:HGNC:6324]	GO:0048471;GO:0044295;GO:0043227;GO:0043005;GO:0035253;GO:0030139;GO:0015630;GO:0005737;GO:1905152;GO:0090316;GO:0072383;GO:0047496;GO:0035774;GO:0035617;GO:0032230;GO:0031340;GO:0021766;GO:0007420;GO:0007028;GO:0099609;GO:0008432;GO:0008017;GO:0003777;GO:0005515;GO:0005829;GO:0005524;GO:0000166;GO:0016020;GO:0005815;GO:0005856;GO:0005874;GO:0003774;GO:0007018;GO:0045296;GO:0030705;GO:0031982;GO:…	K10396-ko04144 Endocytosis;ko04728 Dopaminergic synapse	KOG0240-Kinesin (SMY1 subfamily)[Z]
ENSG00000130311	1.81365	50.5082	-4.79955	0	0	down	DDA1	DET1 and DDB1 associated 1 [Source:HGNC Symbol;Acc:HGNC:28360]	GO:0005515;GO:0032434;GO:0005654;GO:0043687	-	KOG4816-Uncharacterized conserved protein[S]
ENSG00000210144	64537.3	51385.7	0.328767	0	0	-	MT-TY	mitochondrially encoded tRNA tyrosine [Source:HGNC Symbol;Acc:HGNC:7502]	-	-	-
ENSG00000185324	74.5807	15.2647	2.28861	0	0	up	CDK10	cyclin dependent kinase 10 [Source:HGNC Symbol;Acc:HGNC:1770]	GO:0006468;GO:0005524;GO:0004672;GO:0043410;GO:0097472;GO:0005515;GO:0016310;GO:0016301;GO:0016740;GO:0004674;GO:0000166;GO:0016592;GO:0008285;GO:0004693;GO:0007089	-	KOG0663-Protein kinase PITSLRE and related kinases[R]
ENSG00000144381	10.4744	132.785	-3.66415	0	0	down	HSPD1	heat shock protein family D (Hsp60) member 1 [Source:HGNC Symbol;Acc:HGNC:5261]	GO:0045121;GO:0043209;GO:0043231;GO:0042588;GO:0030141;GO:0030061;GO:0016020;GO:0009986;GO:0005886;GO:0005829;GO:0005791;GO:0005794;GO:0005782;GO:0005743;GO:0005739;GO:0005737;GO:0005615;GO:2000778;GO:1904469;GO:1903427;GO:0051384;GO:0071866;GO:0051085;GO:0050870;GO:0050729;GO:0043627;GO:0043524;GO:0043066;GO:0042493;GO:0042542;GO:0042220;GO:0042110;GO:0033198;GO:0032729;GO:0032727;GO:0032496;GO:…	K04077-ko03018 RNA degradation;ko04212 Longevity regulating pathway - worm;ko04940 Type I diabetes mellitus;ko05134 Legionellosis;ko05152 Tuberculosis	KOG0356-Mitochondrial chaperonin, Cpn60/Hsp60p[O]
ENSG00000072958	15.9773	9.11596	0.809558	0	0	-	AP1M1	adaptor related protein complex 1 mu 1 subunit [Source:HGNC Symbol;Acc:HGNC:13667]	GO:0005515;GO:0030131;GO:0005794;GO:0016192;GO:0015031;GO:0006886;GO:0006810;GO:0016020;GO:0031410;GO:0005886;GO:0005829;GO:0070062;GO:0043312;GO:0035579;GO:0016032;GO:0019886;GO:0032588;GO:0032438;GO:0030665;GO:0000139;GO:0005765;GO:0050690;GO:0030659;GO:0030669;GO:0035646	K12393-ko04142 Lysosome	KOG0937-Adaptor complexes medium subunit family[U]
ENSG00000147065	23.5135	107.1	-2.1874	0	0	down	MSN	moesin [Source:HGNC Symbol;Acc:HGNC:7373]	GO:0045177;GO:0043209;GO:0016324;GO:0016323;GO:0001931;GO:0071803;GO:0009986;GO:0019899;GO:0019898;GO:0008092;GO:0007010;GO:0005515;GO:0005856;GO:0005886;GO:0003779;GO:0005829;GO:0016020;GO:0005737;GO:0005634;GO:0048471;GO:0005615;GO:0005925;GO:0042995;GO:0030175;GO:0070062;GO:0010628;GO:0071944;GO:0072562;GO:0005102;GO:0072678;GO:0008360;GO:0005200;GO:0031982;GO:0061028;GO:0031528;GO:0019901;GO:…	K05763-ko04810 Regulation of actin cytoskeleton;ko04670 Leukocyte transendothelial migration;ko05205 Proteoglycans in cancer;ko05162 Measles	KOG3529-Radixin, moesin and related proteins of the ERM family[R]
ENSG00000205426	918.664	602.306	0.609042	0	0	-	KRT81	keratin 81 [Source:HGNC Symbol;Acc:HGNC:6458]	GO:0005882;GO:0005515;GO:0005198;GO:0005615;GO:0045095;GO:0005829;GO:0031424;GO:0070268	-	-
ENSG00000142534	5644.83	3983.34	0.502953	0	0	-	RPS11	ribosomal protein S11 [Source:HGNC Symbol;Acc:HGNC:10384]	GO:0022627;GO:0016020;GO:0001649;GO:0005515;GO:0005840;GO:0006412;GO:0003735;GO:0005622;GO:0030529;GO:0005737;GO:0003723;GO:0005925;GO:0005730;GO:0005829;GO:0070062;GO:0005654;GO:0031012;GO:0019843;GO:0006413;GO:0006364;GO:0000184;GO:0019083;GO:0006614	K02949-ko03010 Ribosome	KOG1728-40S ribosomal protein S11[J]
ENSG00000122378	0.1368	99.3201	-9.50387	0	0	down	FAM213A	family with sequence similarity 213 member A [Source:HGNC Symbol;Acc:HGNC:28651]	GO:0005576;GO:0055114;GO:0005737;GO:0098869;GO:0070062;GO:0016209;GO:0045670	-	KOG4498-Uncharacterized conserved protein[S]
ENSG00000047410	1.06904	21.7329	-4.3455	0	0	down	TPR	translocated promoter region, nuclear basket protein [Source:HGNC Symbol;Acc:HGNC:12017]	GO:0044615;GO:0042405;GO:0034399;GO:0031965;GO:0005643;GO:0005635;GO:0035457;GO:0060964;GO:0005515;GO:0042803;GO:0005694;GO:0051301;GO:0015031;GO:0016020;GO:0005737;GO:0005634;GO:0051028;GO:0006810;GO:0003723;GO:0007049;GO:0005856;GO:0005819;GO:0000775;GO:0000776;GO:0003729;GO:0003674;GO:0008150;GO:0005575;GO:0000122;GO:0075733;GO:0005654;GO:0003682;GO:0070840;GO:0042307;GO:0015631;GO:0005868;GO:…	K09291-ko03013 RNA transport;ko05200 Pathways in cancer;ko05216 Thyroid cancer	KOG4674-Uncharacterized conserved coiled-coil protein[S]
ENSG00000167770	10.6392	97.211	-3.19173	0	0	down	OTUB1	OTU deubiquitinase, ubiquitin aldehyde binding 1 [Source:HGNC Symbol;Acc:HGNC:23077]	GO:0016579;GO:0004843;GO:0006508;GO:0008234;GO:0008233;GO:0005515;GO:0016787;GO:0005737;GO:0036459;GO:0006281;GO:0006974;GO:0002376;GO:0002250;GO:0005634;GO:0005829;GO:0070062;GO:0005654;GO:0071108;GO:0031625;GO:0019784;GO:0043130;GO:1901315;GO:2000780;GO:0071347	-	KOG3991-Uncharacterized conserved protein[S]
ENSG00000150991	605.505	388.863	0.638876	0	0	-	UBC	ubiquitin C [Source:HGNC Symbol;Acc:HGNC:12468]	GO:0043209;GO:0010992;GO:0005515;GO:0005737;GO:0005634;GO:0003723;GO:0044322;GO:0005615;GO:0038095;GO:0005886;GO:0016567;GO:0005829;GO:0005789;GO:0070062;GO:0034220;GO:0044267;GO:0061024;GO:0016197;GO:0019058;GO:0075733;GO:0010008;GO:0000165;GO:0000209;GO:0002223;GO:0010972;GO:0016579;GO:0031145;GO:0031146;GO:0033209;GO:0038061;GO:0043161;GO:0043488;GO:0050852;GO:0051437;GO:0055085;GO:0060071;GO:…	K08770-ko03320 PPAR signaling pathway	KOG0001-Ubiquitin and ubiquitin-like proteins[OR]
ENSG00000184640	13.5075	74.938	-2.47194	0	0	down	2018-09-09	septin 9 [Source:HGNC Symbol;Acc:HGNC:7323]	GO:0005515;GO:0015629;GO:0051301;GO:0005525;GO:0000166;GO:0005737;GO:0007049;GO:0048471;GO:0005856;GO:0005874;GO:0045296;GO:0051291;GO:0003924;GO:0001725;GO:0005930;GO:0031105;GO:0097730;GO:1902857	K16938-ko05100 Bacterial invasion of epithelial cells	KOG1547-Septin CDC10 and related P-loop GTPases[DTZ]
ENSG00000129347	13.5646	101.19	-2.89915	0	0	down	KRI1	KRI1 homolog [Source:HGNC Symbol;Acc:HGNC:25769]	GO:0005730;GO:0003723;GO:0030686;GO:0000447	-	-
ENSG00000198888	1548.96	975.093	0.667684	0	0	-	MT-ND1	mitochondrially encoded NADH:ubiquinone oxidoreductase core subunit 1 [Source:HGNC Symbol;Acc:HGNC:7455]	GO:0043025;GO:0030425;GO:0005739;GO:0042493;GO:0033194;GO:0014070;GO:0005515;GO:0005743;GO:0055114;GO:0016491;GO:0016020;GO:0016021;GO:0070469;GO:0031966;GO:0008137;GO:0006120;GO:0032981;GO:0005747;GO:0045333	K03878-ko00190 Oxidative phosphorylation;ko05012 Parkinson's disease	KOG4770-NADH dehydrogenase subunit 1[C]
ENSG00000167526	5071.56	4109.86	0.303341	0	0	-	RPL13	ribosomal protein L13 [Source:HGNC Symbol;Acc:HGNC:10303]	GO:0005515;GO:0005840;GO:0006412;GO:0003735;GO:0005622;GO:0030529;GO:0016020;GO:0005634;GO:0003723;GO:0005829;GO:0006413;GO:0006364;GO:0000184;GO:0019083;GO:0006614;GO:0022625;GO:0022626	K02873-ko03010 Ribosome	KOG3295-60S Ribosomal protein L13[J]
ENSG00000100941	2.42545	56.5035	-4.54202	0	0	down	PNN	pinin, desmosome associated protein [Source:HGNC Symbol;Acc:HGNC:9162]	GO:0005681;GO:0006355;GO:0006351;GO:0003677;GO:0016020;GO:0016607;GO:0005634;GO:0008380;GO:0006397;GO:0003723;GO:0030054;GO:0005886;GO:0000398;GO:0007155;GO:0035145;GO:0005198;GO:0005911;GO:0071013;GO:0030057;GO:0005882	-	-
ENSG00000108424	21.0918	65.3642	-1.63182	0	0	down	KPNB1	karyopherin subunit beta 1 [Source:HGNC Symbol;Acc:HGNC:6400]	GO:0045540;GO:0005515;GO:0031965;GO:0005654;GO:0005829;GO:0015031;GO:0006886;GO:0016020;GO:0005737;GO:0005634;GO:0006810;GO:0003723;GO:0008536;GO:0005576;GO:0070062;GO:0075733;GO:0008565;GO:0019054;GO:0043312;GO:0016032;GO:0090307;GO:0019899;GO:0019904;GO:1904813;GO:0006309;GO:0035580;GO:0006607;GO:0006610;GO:0005643;GO:0034399;GO:0008139;GO:0005635;GO:0008270;GO:0007080;GO:0045184;GO:0006606;GO:…	K14293-ko03013 RNA transport	KOG1241-Karyopherin (importin) beta 1[YU]
ENSG00000131747	3.39487	39.0238	-3.52292	0	0	down	TOP2A	topoisomerase (DNA) II alpha [Source:HGNC Symbol;Acc:HGNC:11989]	GO:0005634;GO:0000793;GO:0045944;GO:0042752;GO:0040016;GO:0030261;GO:0007059;GO:0006265;GO:0002244;GO:0003918;GO:0048511;GO:0003916;GO:0005515;GO:0042803;GO:0003677;GO:0006259;GO:0005730;GO:0016853;GO:0005524;GO:0000166;GO:0046872;GO:0005737;GO:0003723;GO:0006974;GO:0000287;GO:0005654;GO:0000712;GO:0006312;GO:0005814;GO:0003682;GO:0043065;GO:0008022;GO:0043130;GO:0019899;GO:0043234;GO:0046982;GO:…	K03164-ko01524 Platinum drug resistance	KOG0355-DNA topoisomerase type II[B]
ENSG00000100316	2536.96	1828.3	0.4726	0	0	-	RPL3	ribosomal protein L3 [Source:HGNC Symbol;Acc:HGNC:10332]	GO:0005840;GO:0006412;GO:0003735;GO:0005622;GO:0030529;GO:0005829;GO:0005730;GO:0022625;GO:0071353;GO:0008097;GO:0005737;GO:0005634;GO:0003723;GO:0005925;GO:0070062;GO:0005515;GO:0006413;GO:0006364;GO:0000184;GO:0019083;GO:0006614	K02925-ko03010 Ribosome	KOG0746-60S ribosomal protein L3 and related proteins[J]
ENSG00000101224	5.01617	69.5209	-3.79279	0	0	down	CDC25B	cell division cycle 25B [Source:HGNC Symbol;Acc:HGNC:1726]	GO:1902751;GO:0005737;GO:0005634;GO:0045860;GO:0007144;GO:0001556;GO:0000278;GO:0005515;GO:0004721;GO:0035335;GO:0006470;GO:0004725;GO:0051301;GO:0005622;GO:0016787;GO:0007049;GO:0005856;GO:0000922;GO:0005813;GO:0005815;GO:0005829;GO:0005654;GO:0000086;GO:0006468;GO:0032467;GO:0019901;GO:0008284;GO:0045931	K05866-ko04010 MAPK signaling pathway;ko04110 Cell cycle;ko04914 Progesterone-mediated oocyte maturation;ko05206 MicroRNAs in cancer	KOG3772-M-phase inducer phosphatase[D]
ENSG00000103145	444.233	91.0587	2.28645	0	0	up	HCFC1R1	host cell factor C1 regulator 1 [Source:HGNC Symbol;Acc:HGNC:21198]	GO:0005654;GO:0005737;GO:0005634	-	-
ENSG00000158747	5.14044	87.8494	-4.09507	0	0	down	NBL1	neuroblastoma 1, DAN family BMP antagonist [Source:HGNC Symbol;Acc:HGNC:7650]	GO:0005576;GO:0005515;GO:0042803;GO:0005615;GO:0036122;GO:0016015;GO:0030514;GO:0048263;GO:0090027;GO:0007399;GO:0035582;GO:0045666;GO:0038098;GO:0048812	K19558-ko04350 TGF-beta signaling pathway	-
ENSG00000055070	2.1106	51.6944	-4.61428	0	0	down	SZRD1	SUZ RNA binding domain containing 1 [Source:HGNC Symbol;Acc:HGNC:30232]	-	-	-
ENSG00000135486	77.4505	274.234	-1.82406	0	0	down	HNRNPA1	heterogeneous nuclear ribonucleoprotein A1 [Source:HGNC Symbol;Acc:HGNC:5031]	GO:0005681;GO:0042149;GO:0000381;GO:0036002;GO:0016070;GO:0005515;GO:0030529;GO:0019013;GO:0005654;GO:0016020;GO:0005737;GO:0005634;GO:0051028;GO:0006810;GO:0008380;GO:0006397;GO:0003723;GO:0003676;GO:0070062;GO:0016032;GO:0000398;GO:0032212;GO:0008543;GO:0071013;GO:0061752;GO:0032211;GO:0003697;GO:0003727;GO:0098505;GO:0006405;GO:0051168;GO:0051170;GO:1903936	K12741-ko03040 Spliceosome	KOG0118-FOG: RRM domain[R]
ENSG00000156515	5.95067	62.1848	-3.38544	0	0	down	HK1	hexokinase 1 [Source:HGNC Symbol;Acc:HGNC:4922]	GO:0005623;GO:0046835;GO:0005975;GO:0001678;GO:0016773;GO:0005536;GO:0004396;GO:0006096;GO:0016310;GO:0016301;GO:0016740;GO:0005524;GO:0000166;GO:0005739;GO:0008152;GO:0003824;GO:0005515;GO:0051156;GO:0016020;GO:0005741;GO:0005829;GO:0061621;GO:0015758;GO:0004340;GO:0008865;GO:0019158;GO:0019318;GO:0072655;GO:0072656;GO:0097228;GO:0005929;GO:0045121	K00844-ko01200 Carbon metabolism;ko00010 Glycolysis / Gluconeogenesis;ko00051 Fructose and mannose metabolism;ko00052 Galactose metabolism;ko00500 Starch and sucrose metabolism;ko00520 Amino sugar and nucleotide sugar metabolism;ko00521 Streptomycin biosynthesis;ko00524 Neomycin, kanamycin and gentamicin biosynthesis;ko04066 HIF-1 signaling pathway;ko04910 Insulin signaling pathway;ko04973 Carboh…	KOG1369-Hexokinase[G]
ENSG00000142507	408.435	115.661	1.82021	0	0	up	PSMB6	proteasome subunit beta 6 [Source:HGNC Symbol;Acc:HGNC:9543]	GO:0005839;GO:0000502;GO:0006508;GO:0008233;GO:0016787;GO:0005654;GO:0005829;GO:0005737;GO:0005634;GO:0004175;GO:0004298;GO:0051603;GO:0038095;GO:0045296;GO:0070062;GO:0000165;GO:0000209;GO:0002223;GO:0002479;GO:0006521;GO:0010972;GO:0016579;GO:0031145;GO:0031146;GO:0033209;GO:0038061;GO:0043161;GO:0043488;GO:0050852;GO:0051437;GO:0055085;GO:0060071;GO:0061418;GO:0090090;GO:0090263;GO:0016032;GO:…	K02738-ko03050 Proteasome	KOG0174-20S proteasome, regulatory subunit beta type PSMB6/PSMB9/PRE3[O]
ENSG00000088325	9.20489	71.2851	-2.95313	0	0	down	TPX2	TPX2, microtubule nucleation factor [Source:HGNC Symbol;Acc:HGNC:1249]	GO:0043203;GO:0005819;GO:0090307;GO:0060236;GO:0061676;GO:0019901;GO:0000278;GO:0005515;GO:0051301;GO:0005654;GO:0005737;GO:0005634;GO:0006915;GO:0007049;GO:0005856;GO:0005874;GO:0000922;GO:0005829;GO:0000086;GO:0072686;GO:0005525;GO:1901796;GO:0008283;GO:0032147;GO:0005524;GO:0015630	-	-
ENSG00000011478	108.298	10.3684	3.38474	0	0	up	QPCTL	glutaminyl-peptide cyclotransferase like [Source:HGNC Symbol;Acc:HGNC:25952]	GO:0008270;GO:0016746;GO:0005794;GO:0016740;GO:0046872;GO:0016021;GO:0016020;GO:0000139;GO:0016603;GO:0017186	-	KOG3946-Glutaminyl cyclase[O]
ENSG00000142945	3.20846	62.5228	-4.28443	0	0	down	KIF2C	kinesin family member 2C [Source:HGNC Symbol;Acc:HGNC:6393]	GO:0003777;GO:0005524;GO:0000166;GO:0008017;GO:0003774;GO:0007018;GO:0000775;GO:0000278;GO:0005515;GO:0005813;GO:0005694;GO:0051301;GO:0005654;GO:0005829;GO:0016020;GO:0005737;GO:0005634;GO:0007049;GO:0005856;GO:0005874;GO:0007059;GO:0000776;GO:0000777;GO:0006890;GO:0016887;GO:0007062;GO:0019886;GO:0008283;GO:0051310;GO:0051315;GO:0005871;GO:0005881;GO:0019237;GO:0007080;GO:0051983;GO:0051010;GO:…	-	KOG0246-Kinesin-like protein[Z]
ENSG00000160932	139.104	8.93916	3.95988	0	0	up	LY6E	lymphocyte antigen 6 family member E [Source:HGNC Symbol;Acc:HGNC:6727]	GO:0005886;GO:0016020;GO:0031225;GO:0005576;GO:0006501;GO:0005887;GO:0007166	-	-
ENSG00000102241	0.543323	53.7616	-6.62862	0	0	down	HTATSF1	HIV-1 Tat specific factor 1 [Source:HGNC Symbol;Acc:HGNC:5276]	GO:0005654;GO:0003676;GO:0000398;GO:0006355;GO:0006351;GO:0005634;GO:0003723;GO:0006357;GO:0019079;GO:0005684;GO:0032784;GO:0005686	-	KOG1548-Transcription elongation factor TAT-SF1[K]
ENSG00000177706	82.7056	20.7034	1.99812	0	0	up	FAM20C	FAM20C, golgi associated secretory pathway kinase [Source:HGNC Symbol;Acc:HGNC:22140]	GO:0005794;GO:0005737;GO:0005615;GO:0097187;GO:0071895;GO:0070166;GO:0051174;GO:0046034;GO:0045669;GO:0040036;GO:0036179;GO:0030501;GO:0006468;GO:0001501;GO:0005509;GO:0004674;GO:0005576;GO:0005515;GO:0016310;GO:0016301;GO:0016740;GO:0005524;GO:0000166;GO:0046872;GO:0070062;GO:0031214;GO:0044267;GO:0005788;GO:0043687;GO:0030145	-	KOG3829-Uncharacterized conserved protein[S]
ENSG00000197958	3705.5	2277.88	0.701977	0	0	-	RPL12	ribosomal protein L12 [Source:HGNC Symbol;Acc:HGNC:10302]	GO:0005737;GO:0005730;GO:0005634;GO:0005515;GO:0005840;GO:0006412;GO:0003735;GO:0030529;GO:0016020;GO:0003723;GO:0005925;GO:0019843;GO:0000027;GO:0005829;GO:0070062;GO:0031012;GO:0006413;GO:0006364;GO:0000184;GO:0019083;GO:0006614;GO:0022625	K02870-ko03010 Ribosome	KOG0886-40S ribosomal protein S2[J]
ENSG00000137312	28.8649	169.908	-2.55737	0	0	down	FLOT1	flotillin 1 [Source:HGNC Symbol;Acc:HGNC:3757]	GO:0045121;GO:0044853;GO:0042383;GO:0016600;GO:0016020;GO:0005901;GO:0005886;GO:2000049;GO:1901890;GO:1901741;GO:0090002;GO:0072659;GO:0070528;GO:0048643;GO:0045807;GO:0035023;GO:0032226;GO:0032092;GO:0007409;GO:0002090;GO:0035255;GO:0002020;GO:0042470;GO:0005515;GO:0005765;GO:0031410;GO:0005925;GO:0005768;GO:0030027;GO:0070062;GO:0001934;GO:0022617;GO:0008180;GO:0016323;GO:0001819;GO:0005769;GO:…	K07192-ko04910 Insulin signaling pathway	KOG2668-Flotillins[UZ]
ENSG00000153187	13.9908	66.3039	-2.24461	0	0	down	HNRNPU	heterogeneous nuclear ribonucleoprotein U [Source:HGNC Symbol;Acc:HGNC:5048]	GO:0016070;GO:0048511;GO:0005681;GO:0005515;GO:0030529;GO:0003677;GO:0005654;GO:0005524;GO:0000166;GO:0016020;GO:0005737;GO:0005634;GO:0008380;GO:0006397;GO:0003723;GO:0001047;GO:0031012;GO:0000398;GO:0009986;GO:0032922;GO:0036464;GO:0070034;GO:0005697;GO:0006396;GO:0071013;GO:0001649;GO:0070934;GO:0070937;GO:0032211	K12888-ko03040 Spliceosome	-
ENSG00000149091	164.982	35.4774	2.21733	0	0	up	DGKZ	diacylglycerol kinase zeta [Source:HGNC Symbol;Acc:HGNC:2857]	GO:0005886;GO:0003951;GO:0016301;GO:0008152;GO:0035556;GO:0016310;GO:0016740;GO:0005524;GO:0000166;GO:0046872;GO:0016020;GO:0016607;GO:0005737;GO:0005634;GO:0004143;GO:0007205;GO:0005515;GO:0030027;GO:0030168;GO:0016477;GO:0046339;GO:0046834;GO:0046486;GO:0005622	K00901-ko00561 Glycerolipid metabolism;ko00564 Glycerophospholipid metabolism;ko04070 Phosphatidylinositol signaling system;ko04072 Phospholipase D signaling pathway;ko05231 Choline metabolism in cancer	KOG0782-Predicted diacylglycerol kinase[T]
ENSG00000184281	39.6687	216.464	-2.44806	0	0	down	TSSC4	tumor suppressing subtransferable candidate 4 [Source:HGNC Symbol;Acc:HGNC:12386]	GO:0005515	-	-
ENSG00000149547	4.57248	76.3317	-4.06123	0	0	down	EI24	EI24, autophagy associated transmembrane protein [Source:HGNC Symbol;Acc:HGNC:13276]	GO:0005789;GO:0005783;GO:0005829;GO:0005794;GO:0016021;GO:0016020;GO:0005737;GO:0005634;GO:0006915;GO:0006914;GO:0031965;GO:0016236;GO:0030308	K10134-ko04115 p53 signaling pathway	KOG3966-p53-mediated apoptosis protein EI24/PIG8[TV]
ENSG00000125755	276.414	624.911	-1.17682	0	0	down	SYMPK	symplekin [Source:HGNC Symbol;Acc:HGNC:22935]	GO:0005515;GO:0005886;GO:0007155;GO:0005654;GO:0005829;GO:0016020;GO:0005737;GO:0005634;GO:0006397;GO:0030054;GO:0005856;GO:0005923;GO:0006369;GO:0031124;GO:0000398;GO:0006406;GO:0006378;GO:0097165;GO:0035307	K06100-ko03015 mRNA surveillance pathway;ko04530 Tight junction	KOG1895-mRNA cleavage and polyadenylation factor II complex, subunit PTA1[A]
ENSG00000187109	43.8245	163.122	-1.89614	0	0	down	NAP1L1	nucleosome assembly protein 1 like 1 [Source:HGNC Symbol;Acc:HGNC:7637]	GO:0042470;GO:0005515;GO:0006334;GO:0016020;GO:0005634;GO:0003723;GO:0008284;GO:0006260	-	KOG1507-Nucleosome assembly protein NAP-1[BD]
ENSG00000073008	3.42651	52.4814	-3.93699	0	0	down	PVR	poliovirus receptor [Source:HGNC Symbol;Acc:HGNC:9705]	GO:0009986;GO:0005886;GO:0016477;GO:0016337;GO:0045503;GO:0001618;GO:0016021;GO:0016020;GO:0046718;GO:0005576;GO:0005515;GO:0007155;GO:0005925;GO:0050776;GO:0005887;GO:0070062;GO:0016032;GO:0005737;GO:0004872;GO:0005615;GO:0005102;GO:0042803;GO:0007156;GO:0007157;GO:0045954;GO:0005913;GO:0034332;GO:0050839;GO:0008037;GO:0002860;GO:0042271;GO:0060370	K06539-ko04514 Cell adhesion molecules (CAMs)	-
ENSG00000110958	2.082	81.2564	-5.28644	0	0	down	PTGES3	prostaglandin E synthase 3 [Source:HGNC Symbol;Acc:HGNC:16049]	GO:0051879;GO:0051131;GO:0050821;GO:0043234;GO:0005515;GO:0006633;GO:0006631;GO:0006629;GO:0005654;GO:0005829;GO:0016853;GO:0005737;GO:0005634;GO:0000781;GO:0070062;GO:0006805;GO:0000723;GO:0007165;GO:0042327;GO:0051082;GO:0050220;GO:0001516;GO:0006693;GO:0019371;GO:0051973;GO:0003720;GO:0007004;GO:0005697;GO:1900034;GO:0070182;GO:1905323;GO:0070389;GO:0060430;GO:0043588;GO:0042921;GO:0008283;GO:…	K15730-ko00590 Arachidonic acid metabolism	KOG3158-HSP90 co-chaperone p23[O]
ENSG00000148334	122.994	39.256	1.6476	0	0	up	PTGES2	prostaglandin E synthase 2 [Source:HGNC Symbol;Acc:HGNC:17822]	GO:0005829;GO:0005739;GO:0005634;GO:0046903;GO:0045893;GO:0003677;GO:0005515;GO:0055114;GO:0006633;GO:0006631;GO:0045454;GO:0006629;GO:0005794;GO:0016829;GO:0016853;GO:0016021;GO:0016020;GO:0005737;GO:0000139;GO:0048471;GO:0009055;GO:0015035;GO:0005576;GO:0020037;GO:0043312;GO:0035578;GO:0043295;GO:0050220;GO:0001516;GO:0006693;GO:0019371	K05309-ko00590 Arachidonic acid metabolism	KOG3029-Glutathione S-transferase-related protein[R]
ENSG00000125991	1049.65	472.016	1.153	0	0	up	ERGIC3	ERGIC and golgi 3 [Source:HGNC Symbol;Acc:HGNC:15927]	GO:0005794;GO:0005789;GO:0005783;GO:0016021;GO:0016020;GO:0006810;GO:0016192;GO:0033116	-	KOG2667-COPII vesicle protein[U]
ENSG00000125730	922.748	59.2507	3.96103	0	0	up	C3	complement C3 [Source:HGNC Symbol;Acc:HGNC:1318]	GO:0005615;GO:0050766;GO:0045766;GO:0006956;GO:0001970;GO:0001798;GO:0006508;GO:0005576;GO:0005515;GO:0006631;GO:0010951;GO:0006629;GO:0006954;GO:0002376;GO:0045087;GO:0004252;GO:0050776;GO:0005886;GO:0004866;GO:0070062;GO:0001934;GO:0044267;GO:0072562;GO:0043312;GO:0007186;GO:0006955;GO:0007165;GO:0006958;GO:0034774;GO:0005102;GO:0035578;GO:0005788;GO:0043687;GO:0006957;GO:0030449;GO:0031715;GO:…	K03990-ko04145 Phagosome;ko04610 Complement and coagulation cascades;ko05203 Viral carcinogenesis;ko05322 Systemic lupus erythematosus;ko05133 Pertussis;ko05134 Legionellosis;ko05150 Staphylococcus aureus infection;ko05152 Tuberculosis;ko05168 Herpes simplex infection;ko05140 Leishmaniasis;ko05142 Chagas disease (American trypanosomiasis)	KOG1366-Alpha-macroglobulin[O]
ENSG00000129353	40.101	3.25177	3.62434	0	0	up	SLC44A2	solute carrier family 44 member 2 [Source:HGNC Symbol;Acc:HGNC:17292]	GO:0004871;GO:0005765;GO:0016021;GO:0016020;GO:0006810;GO:0007165;GO:0005886;GO:0070062;GO:0055085;GO:0043312;GO:0035579;GO:0043123;GO:0006656;GO:0015220;GO:0015871	K15377-ko05231 Choline metabolism in cancer	KOG1362-Choline transporter-like protein[I]
ENSG00000160818	7.60324	85.3279	-3.48833	0	0	down	GPATCH4	G-patch domain containing 4 [Source:HGNC Symbol;Acc:HGNC:25982]	GO:0003676;GO:0002244	-	-
ENSG00000129351	18.1856	56.6164	-1.63842	0	0	down	ILF3	interleukin enhancer binding factor 3 [Source:HGNC Symbol;Acc:HGNC:6038]	GO:0005515;GO:0030529;GO:0006355;GO:0006351;GO:0003677;GO:0005739;GO:0005654;GO:0005730;GO:0016020;GO:0005737;GO:0005634;GO:0003723;GO:0003725;GO:0045893;GO:0051607;GO:0045071;GO:0017148;GO:0045892;GO:0006468	-	KOG3792-Transcription factor NFAT, subunit NF90[R]
ENSG00000117984	2228.27	1407.81	0.662471	0	0	-	CTSD	cathepsin D [Source:HGNC Symbol;Acc:HGNC:2529]	GO:0042470;GO:0005576;GO:0006508;GO:0008233;GO:0005515;GO:0005764;GO:0016787;GO:0004190;GO:0005615;GO:0045121;GO:0004252;GO:0070062;GO:0030574;GO:0031012;GO:0043312;GO:0006914;GO:0030163;GO:0019886;GO:1904813;GO:0035580;GO:1904724;GO:0043202;GO:0004197	K01379-ko04071 Sphingolipid signaling pathway;ko04142 Lysosome;ko04210 Apoptosis;ko05152 Tuberculosis	KOG1339-Aspartyl protease[O]
ENSG00000177954	2491.82	1408.5	0.82304	0	0	-	RPS27	ribosomal protein S27 [Source:HGNC Symbol;Acc:HGNC:10416]	GO:0022627;GO:0005515;GO:0008270;GO:0005840;GO:0006412;GO:0003735;GO:0005622;GO:0030529;GO:0003677;GO:0046872;GO:0005634;GO:0003723;GO:0006364;GO:0000028;GO:0005829;GO:0005654;GO:0008283;GO:0007062;GO:0006413;GO:0000184;GO:0019083;GO:0006614	K02978-ko03010 Ribosome	KOG1779-40s ribosomal protein S27[J]
ENSG00000099783	14.4407	98.9794	-2.77699	0	0	down	HNRNPM	heterogeneous nuclear ribonucleoprotein M [Source:HGNC Symbol;Acc:HGNC:5046]	GO:0003723;GO:0003676;GO:0000398;GO:0031012;GO:0016070;GO:0005681;GO:0005515;GO:0030529;GO:0016020;GO:0005634;GO:0008380;GO:0006397;GO:0005730;GO:0070062;GO:0005654;GO:0005887;GO:0019904;GO:0016363;GO:0008543;GO:0071013;GO:0000380;GO:0042382	K12887-ko03040 Spliceosome	KOG4212-RNA-binding protein hnRNP-M[A]
ENSG00000145833	1.87595	55.8721	-4.89644	0	0	down	DDX46	DEAD-box helicase 46 [Source:HGNC Symbol;Acc:HGNC:18681]	GO:0001650;GO:0005524;GO:0016607;GO:0003676;GO:0005634;GO:0003723;GO:0004386;GO:0016787;GO:0000166;GO:0016020;GO:0008380;GO:0006397;GO:0004004;GO:0010501;GO:0005654;GO:0000398;GO:0010468;GO:0015030	K12811-ko03040 Spliceosome	KOG0334-RNA helicase[A]
ENSG00000141698	85.932	3.88365	4.46771	0	0	up	NT5C3B	5'-nucleotidase, cytosolic IIIB [Source:HGNC Symbol;Acc:HGNC:28300]	GO:0016311;GO:0000287;GO:0005737;GO:0008253;GO:0005515;GO:0016787;GO:0000166;GO:0046872;GO:0009117;GO:0005829;GO:0043928	K01081-ko00230 Purine metabolism;ko00240 Pyrimidine metabolism;ko00760 Nicotinate and nicotinamide metabolism	KOG3128-Uncharacterized conserved protein[S]
ENSG00000064961	28.9406	119.919	-2.05089	0	0	down	HMG20B	high mobility group 20B [Source:HGNC Symbol;Acc:HGNC:5002]	GO:0016604;GO:0003677;GO:0005654;GO:0005634;GO:0045666;GO:0035914;GO:0033234;GO:0046982;GO:0005515;GO:0005694;GO:0016569;GO:0006355;GO:0006351;GO:0016575;GO:0007049;GO:0004407;GO:0007596	-	KOG0381-HMG box-containing protein[R]
ENSG00000133112	44.5417	235.036	-2.39965	0	0	down	TPT1	tumor protein, translationally-controlled 1 [Source:HGNC Symbol;Acc:HGNC:12022]	GO:0005515;GO:0005829;GO:0005737;GO:0003723;GO:0006816;GO:0005509;GO:0070062;GO:0008017;GO:0009615;GO:0030154;GO:0042981;GO:0043066;GO:0005615;GO:0005634;GO:0006874;GO:0045298;GO:1902230;GO:0005771;GO:0005654;GO:2000384;GO:0008134;GO:0019827	-	KOG1727-Microtubule-binding protein (translationally controlled tumor protein)[DZ]
ENSG00000089685	66.8725	12.4732	2.42258	0	0	up	BIRC5	baculoviral IAP repeat containing 5 [Source:HGNC Symbol;Acc:HGNC:593]	GO:0005737;GO:0061469;GO:0061178;GO:0043524;GO:0043066;GO:0007346;GO:0000226;GO:0005515;GO:0005829;GO:0005694;GO:0051301;GO:0016567;GO:0006355;GO:0006351;GO:0046872;GO:0005634;GO:0006915;GO:0007049;GO:0005856;GO:0005874;GO:0008017;GO:0005819;GO:0030496;GO:0004869;GO:0030414;GO:0010466;GO:0042802;GO:0007059;GO:0000775;GO:0000776;GO:0000777;GO:0004842;GO:0005654;GO:0008284;GO:0007062;GO:0019899;GO:…	-	-
ENSG00000177600	14056.6	13878.1	0.0184347	0	0	-	RPLP2	ribosomal protein lateral stalk subunit P2 [Source:HGNC Symbol;Acc:HGNC:10377]	GO:0005515;GO:0005840;GO:0003735;GO:0005622;GO:0030529;GO:0006412;GO:0016020;GO:0006414;GO:0005925;GO:0005829;GO:0070062;GO:0022625;GO:0006413;GO:0006364;GO:0000184;GO:0019083;GO:0006614;GO:0002181	K02943-ko03010 Ribosome	KOG3449-60S acidic ribosomal protein P2[J]
ENSG00000231500	2062.45	1127.38	0.871388	0	0	-	RPS18	ribosomal protein S18 [Source:HGNC Symbol;Acc:HGNC:10401]	GO:0022627;GO:0019901;GO:0005840;GO:0006412;GO:0003735;GO:0005622;GO:0030529;GO:0005829;GO:0016020;GO:0005737;GO:0005634;GO:0003723;GO:0003676;GO:0005925;GO:0005515;GO:0070062;GO:0005654;GO:0031012;GO:0019843;GO:0006413;GO:0006364;GO:0000184;GO:0019083;GO:0006614;GO:0042254;GO:0015935;GO:0005581	K02964-ko03010 Ribosome	KOG3311-Ribosomal protein S18[J]
ENSG00000123989	60.6918	17.5174	1.79272	0	0	up	CHPF	chondroitin polymerizing factor [Source:HGNC Symbol;Acc:HGNC:24291]	GO:0030206;GO:0016757;GO:0005739;GO:0005829;GO:0005794;GO:0016740;GO:0046872;GO:0016021;GO:0016020;GO:0005737;GO:0005759;GO:0008376;GO:0032580;GO:0000139;GO:0047238;GO:0050510	K00747-ko00532 Glycosaminoglycan biosynthesis - chondroitin sulfate / dermatan sulfate	KOG3708-Uncharacterized conserved protein[S]
ENSG00000089220	2.50498	86.0076	-5.10159	0	0	down	PEBP1	phosphatidylethanolamine binding protein 1 [Source:HGNC Symbol;Acc:HGNC:8630]	GO:0005515;GO:0010951;GO:0005524;GO:0000166;GO:0005737;GO:0005634;GO:0003723;GO:0030414;GO:0010466;GO:0008289;GO:0005829;GO:0070062;GO:0000165;GO:0004867;GO:0019899;GO:0019901;GO:0008429	-	KOG3346-Phosphatidylethanolamine binding protein[R]
ENSG00000212907	614.351	1788.36	-1.5415	0	0	down	MT-ND4L	mitochondrially encoded NADH:ubiquinone oxidoreductase core subunit 4L [Source:HGNC Symbol;Acc:HGNC:7460]	GO:0005739;GO:0055114;GO:0016491;GO:0016021;GO:0016020;GO:0070469;GO:0016651;GO:0031966;GO:0042773;GO:0008137;GO:0005747;GO:0006120	K03882-ko00190 Oxidative phosphorylation;ko05012 Parkinson's disease	KOG4669-NADH dehydrogenase subunit 4L and related proteins[C]
ENSG00000269242	266.869	53.4325	2.32034	0	0	up	AC010422.3	-	GO:0005975;GO:0003824;GO:0030246;GO:0015923;GO:0006013;GO:0004559;GO:0006517	-	-
ENSG00000099998	35.0513	173.944	-2.31108	0	0	down	GGT5	gamma-glutamyltransferase 5 [Source:HGNC Symbol;Acc:HGNC:4260]	GO:0006508;GO:0008233;GO:0016746;GO:0016787;GO:0016740;GO:0016021;GO:0016020;GO:0005886;GO:0036374;GO:0006751;GO:0019370;GO:0003840;GO:0006749;GO:0031362;GO:0006520;GO:0006691;GO:0006750;GO:1901750;GO:0006954	K18592-ko00590 Arachidonic acid metabolism;ko00430 Taurine and hypotaurine metabolism;ko00460 Cyanoamino acid metabolism;ko00480 Glutathione metabolism	KOG2410-Gamma-glutamyltransferase[E]
ENSG00000103249	6.6617	86.9249	-3.70581	0	0	down	CLCN7	chloride voltage-gated channel 7 [Source:HGNC Symbol;Acc:HGNC:2025]	GO:0031410;GO:0009268;GO:0015297;GO:0006811;GO:1903959;GO:0005765;GO:0005216;GO:0005524;GO:0000166;GO:0016020;GO:0055085;GO:0016021;GO:0006810;GO:1902476;GO:0006821;GO:0005764;GO:0005247;GO:0034220;GO:0005254	-	KOG0474-Cl- channel CLC-7 and related proteins (CLC superfamily)[P]
ENSG00000124614	4901.15	4375.2	0.163773	0	0	-	RPS10	ribosomal protein S10 [Source:HGNC Symbol;Acc:HGNC:10383]	GO:0005829;GO:0005840;GO:0030529;GO:0006412;GO:0016020;GO:0005737;GO:0005634;GO:0003723;GO:0022627;GO:0005925;GO:0005730;GO:0000028;GO:0005515;GO:0070062;GO:0005654;GO:0031012;GO:0003735;GO:0006413;GO:0006364;GO:0000184;GO:0019083;GO:0006614	K02947-ko03010 Ribosome	KOG3344-40s ribosomal protein s10[J]
ENSG00000100097	2138.27	1364.85	0.647699	0	0	-	LGALS1	galectin 1 [Source:HGNC Symbol;Acc:HGNC:6561]	GO:0009986;GO:0005829;GO:0005737;GO:0005634;GO:0005615;GO:0071407;GO:0071333;GO:0048678;GO:0045445;GO:0042493;GO:0035900;GO:0034120;GO:0031295;GO:0010977;GO:0010812;GO:0002317;GO:0043236;GO:0042803;GO:0030395;GO:0030246;GO:0001948;GO:0005576;GO:0004871;GO:0005515;GO:0003723;GO:0006915;GO:0005578;GO:0007165;GO:0070062;GO:0044267;GO:0031012;GO:0043123;GO:0042981;GO:0046598;GO:0005788;GO:0005622;GO:…	-	KOG3587-Galectin, galactose-binding lectin[W]
ENSG00000132522	138.125	23.1701	2.57564	0	0	up	GPS2	G protein pathway suppressor 2 [Source:HGNC Symbol;Acc:HGNC:4550]	GO:0005515;GO:0003714;GO:0000122;GO:0005654;GO:0046329;GO:0005095;GO:0034260;GO:0017053;GO:0007049;GO:0007254;GO:0000188;GO:0005634	K15307-ko05166 HTLV-I infection	-
ENSG00000161847	58.4411	18.0292	1.69665	0	0	up	RAVER1	ribonucleoprotein, PTB binding 1 [Source:HGNC Symbol;Acc:HGNC:30296]	GO:0003676;GO:0005737;GO:0005634;GO:0003723;GO:0000398	-	-
ENSG00000169733	42.8053	1.06092	5.33441	0	0	up	RFNG	RFNG O-fucosylpeptide 3-beta-N-acetylglucosaminyltransferase [Source:HGNC Symbol;Acc:HGNC:9974]	GO:0045747;GO:0032092;GO:0005576;GO:0016757;GO:0030173;GO:0005794;GO:0016740;GO:0046872;GO:0016020;GO:0016021;GO:0000139;GO:0007275;GO:0007399;GO:0030154;GO:0003674;GO:0070062;GO:0033829;GO:0007389;GO:0009887	K05948-ko00514 Other types of O-glycan biosynthesis;ko04330 Notch signaling pathway	-
ENSG00000213741	1978.49	952.326	1.05487	0	0	up	RPS29	ribosomal protein S29 [Source:HGNC Symbol;Acc:HGNC:10419]	GO:0008270;GO:0005840;GO:0006412;GO:0003735;GO:0005622;GO:0030529;GO:0046872;GO:0022627;GO:0005925;GO:0005829;GO:0070062;GO:0005654;GO:0006413;GO:0006364;GO:0000184;GO:0019083;GO:0006614;GO:0015935	K02980-ko03010 Ribosome	KOG3506-40S ribosomal protein S29[J]
ENSG00000147604	258.486	633.853	-1.29406	0	0	down	RPL7	ribosomal protein L7 [Source:HGNC Symbol;Acc:HGNC:10363]	GO:0005515;GO:0005840;GO:0030529;GO:0006412;GO:0016020;GO:0005737;GO:0005634;GO:0003723;GO:0003735;GO:0005925;GO:0006364;GO:0005730;GO:0005829;GO:0070062;GO:0042273;GO:0006413;GO:0003677;GO:0042803;GO:0000184;GO:0019083;GO:0006614;GO:0002181;GO:0022625;GO:0003729;GO:0000463	K02937-ko03010 Ribosome	KOG3184-60S ribosomal protein L7[J]
ENSG00000233276	970.319	565.959	0.777763	0	0	-	GPX1	glutathione peroxidase 1 [Source:HGNC Symbol;Acc:HGNC:4553]	GO:0005739;GO:1902176;GO:0060055;GO:0060047;GO:0051897;GO:0051702;GO:0051450;GO:0048741;GO:0045444;GO:0043534;GO:0043523;GO:0043403;GO:0043066;GO:0042744;GO:0042542;GO:0042311;GO:0033194;GO:0018158;GO:0014902;GO:0010332;GO:0009636;GO:0009611;GO:0009609;GO:0009410;GO:0008631;GO:0008283;GO:0007605;GO:0006979;GO:0006915;GO:0006641;GO:0006629;GO:0002862;GO:0001885;GO:0001659;GO:0000302;GO:0004602;GO:…	-	-
ENSG00000078061	67.3828	19.6802	1.77564	0	0	up	ARAF	A-Raf proto-oncogene, serine/threonine kinase [Source:HGNC Symbol;Acc:HGNC:646]	GO:0005057;GO:0005515;GO:0007165;GO:0035556;GO:0016310;GO:0016301;GO:0005622;GO:0016740;GO:0006468;GO:0005524;GO:0004674;GO:0000166;GO:0004672;GO:0046872;GO:0000186;GO:0005739;GO:0070374;GO:0005575;GO:0005829;GO:0000165;GO:0030154;GO:0043066;GO:0007275;GO:0006464;GO:0032006;GO:0033138;GO:0004709;GO:0031434;GO:0009968;GO:0032434;GO:0020021	K08845-ko04012 ErbB signaling pathway;ko04068 FoxO signaling pathway;ko04810 Regulation of actin cytoskeleton;ko04650 Natural killer cell mediated cytotoxicity;ko04910 Insulin signaling pathway;ko04914 Progesterone-mediated oocyte maturation;ko04270 Vascular smooth muscle contraction;ko04726 Serotonergic synapse;ko04720 Long-term potentiation;ko04730 Long-term depression;ko05200 Pathways in cance…	KOG0193-Serine/threonine protein kinase RAF[T]
ENSG00000079462	153.01	18.343	3.06032	0	0	up	PAFAH1B3	platelet activating factor acetylhydrolase 1b catalytic subunit 3 [Source:HGNC Symbol;Acc:HGNC:8576]	GO:0005515;GO:0016042;GO:0006629;GO:0016787;GO:0016020;GO:0005737;GO:0042802;GO:0005829;GO:0070062;GO:0007399;GO:0007420;GO:0004623;GO:0003847;GO:0047179;GO:0007283;GO:0046982	K16795-ko00565 Ether lipid metabolism	-
ENSG00000092853	0.506073	34.3369	-6.08427	0	0	down	CLSPN	claspin [Source:HGNC Symbol;Acc:HGNC:19715]	GO:0005515;GO:0003677;GO:0005654;GO:0005794;GO:0005634;GO:0007049;GO:0006281;GO:0006974;GO:0016579;GO:0006260;GO:0097194;GO:0000077;GO:0031572;GO:0032147;GO:0018105;GO:0010997;GO:0033314	-	KOG4156-Claspin, protein mediating phosphorylation and activation of Chk1 protein kinase in the DNA replication checkpoint response[DT]
ENSG00000006125	5.16613	44.3157	-3.10066	0	0	down	AP2B1	adaptor related protein complex 2 beta 1 subunit [Source:HGNC Symbol;Acc:HGNC:563]	GO:0030117;GO:0016192;GO:0015031;GO:0006886;GO:0016020;GO:0006810;GO:0008565;GO:0030122;GO:0032802;GO:0034383;GO:0005515;GO:0005886;GO:0030131;GO:0005905;GO:0005829;GO:0006897;GO:0061024;GO:0060071;GO:0007018;GO:0019886;GO:0048013;GO:0030666;GO:0036020;GO:0050690;GO:0030669;GO:0030276;GO:0035615;GO:0072583;GO:0005048;GO:0005737;GO:0030118;GO:0005802;GO:0099590;GO:0060976;GO:0035904;GO:0048268;GO:…	K11825-ko04144 Endocytosis;ko04961 Endocrine and other factor-regulated calcium reabsorption;ko04721 Synaptic vesicle cycle;ko05016 Huntington's disease	KOG1061-Vesicle coat complex AP-1/AP-2/AP-4, beta subunit[U]
ENSG00000108639	3.00942	83.9366	-4.80174	0	0	down	SYNGR2	synaptogyrin 2 [Source:HGNC Symbol;Acc:HGNC:11499]	GO:0008021;GO:0005515;GO:0016020;GO:0016021;GO:0031410;GO:0070062;GO:0030672;GO:0031594	-	-
ENSG00000148297	31.1605	3.8047	3.03386	0	0	up	MED22	mediator complex subunit 22 [Source:HGNC Symbol;Acc:HGNC:11477]	GO:0005515;GO:0006355;GO:0006351;GO:0016592;GO:0006357;GO:0001104;GO:0005634;GO:0005737	-	KOG3304-Surfeit family protein 5[R]
ENSG00000143401	0.508978	50.9104	-6.64421	0	0	down	ANP32E	acidic nuclear phosphoprotein 32 family member E [Source:HGNC Symbol;Acc:HGNC:16673]	GO:0031410;GO:0005737;GO:0005634;GO:0019212;GO:0043086;GO:0016569;GO:0042393;GO:0043486;GO:0000812	-	KOG2739-Leucine-rich acidic nuclear protein[DR]
ENSG00000124208	108.763	0.0001	20.0528	0	0	up	TMEM189-UBE2V1	TMEM189-UBE2V1 readthrough [Source:HGNC Symbol;Acc:HGNC:33521]	GO:0005654;GO:0016021;GO:0016020;GO:0005634;GO:0005737;GO:0031625;GO:0061630;GO:0006301;GO:0070534	-	KOG0896-Ubiquitin-conjugating enzyme E2[O]
ENSG00000196498	50.2753	61.6409	-0.294037	0	0	-	NCOR2	nuclear receptor corepressor 2 [Source:HGNC Symbol;Acc:HGNC:7673]	GO:0005634;GO:0000785;GO:0044849;GO:0032355;GO:0010243;GO:0007595;GO:0046965;GO:0042974;GO:0035259;GO:0032403;GO:0016922;GO:0003682;GO:0001012;GO:0003677;GO:0005654;GO:0019216;GO:0005515;GO:0006355;GO:0006351;GO:0016020;GO:0003714;GO:0000122;GO:0008134;GO:0047485;GO:0000790;GO:0016363;GO:0005112;GO:0042826;GO:0017053;GO:1903799;GO:0000118;GO:0072365;GO:0016604	-	-
ENSG00000139579	0.326926	97.1424	-8.21499	0	0	down	NABP2	nucleic acid binding protein 2 [Source:HGNC Symbol;Acc:HGNC:28412]	GO:0006281;GO:0005654;GO:0005829;GO:0003676;GO:0007093;GO:0070876;GO:0005515;GO:0003677;GO:0005634;GO:0006974;GO:0000784;GO:0042795;GO:0000724;GO:1904355;GO:0070200;GO:0003697;GO:0010212;GO:0070182;GO:0098505	-	KOG3416-Predicted nucleic acid binding protein[R]
ENSG00000111057	1036.76	745.029	0.476707	0	0	-	KRT18	keratin 18 [Source:HGNC Symbol;Acc:HGNC:6430]	GO:0005882;GO:0005198;GO:0005829;GO:0045095;GO:0071944;GO:0097284;GO:0097191;GO:0033209;GO:0005515;GO:0005737;GO:0005634;GO:0003723;GO:0007049;GO:0048471;GO:0005730;GO:0070062;GO:0031424;GO:0016032;GO:0098641;GO:0098609;GO:0005913;GO:0043066;GO:0009653;GO:0097110;GO:0045104;GO:0070268;GO:0005815;GO:0034451;GO:0043000	-	-
ENSG00000211445	66.0545	1.32212	5.64273	0	0	up	GPX3	glutathione peroxidase 3 [Source:HGNC Symbol;Acc:HGNC:4555]	GO:0055114;GO:0016491;GO:0098869;GO:0004601;GO:0004602;GO:0006979;GO:0005615;GO:0042744;GO:0034599;GO:0005576;GO:0005515;GO:0070062;GO:0008134;GO:0051289;GO:0008430;GO:0006982	-	KOG1651-Glutathione peroxidase[O]
ENSG00000145191	50.2895	17.6978	1.50669	0	0	up	EIF2B5	eukaryotic translation initiation factor 2B subunit epsilon [Source:HGNC Symbol;Acc:HGNC:3261]	GO:0005851;GO:0005737;GO:0045727;GO:0043434;GO:0043065;GO:0021766;GO:0010226;GO:0009749;GO:0009408;GO:0007568;GO:0031369;GO:0005085;GO:0005515;GO:0043547;GO:0005829;GO:0006413;GO:0006412;GO:0003743;GO:0005634;GO:0035690;GO:0034976;GO:0014002;GO:0045948;GO:0042552;GO:0001541;GO:0032057;GO:0048708;GO:0014003	K03240-ko03013 RNA transport	KOG1461-Translation initiation factor 2B, epsilon subunit (eIF-2Bepsilon/GCD6)[J]
ENSG00000130255	4218.1	3394.59	0.313358	0	0	-	RPL36	ribosomal protein L36 [Source:HGNC Symbol;Acc:HGNC:13631]	GO:0005840;GO:0006412;GO:0003735;GO:0005622;GO:0030529;GO:0016020;GO:0005737;GO:0003723;GO:0005730;GO:0005829;GO:0006413;GO:0006364;GO:0000184;GO:0019083;GO:0006614;GO:0002181;GO:0022625	K02920-ko03010 Ribosome	KOG3452-60S ribosomal protein L36[J]
ENSG00000188157	10.966	57.7354	-2.39642	0	0	down	AGRN	agrin [Source:HGNC Symbol;Acc:HGNC:329]	GO:0005509;GO:0005576;GO:0007165;GO:0007010;GO:0005515;GO:0005886;GO:0005829;GO:0016021;GO:0016020;GO:0043236;GO:0007275;GO:0005578;GO:0030054;GO:0045202;GO:0030154;GO:0007213;GO:0043113;GO:0043547;GO:0045944;GO:0070062;GO:0031012;GO:0043202;GO:0002162;GO:0005200;GO:0033691;GO:0035374;GO:0043395;GO:0001523;GO:0006024;GO:0006027;GO:0030198;GO:0030203;GO:0045162;GO:0045887;GO:0050808;GO:0051491;GO:…	-	-
ENSG00000136877	24.1921	95.5811	-1.98219	0	0	down	FPGS	folylpolyglutamate synthase [Source:HGNC Symbol;Acc:HGNC:3824]	GO:0016874;GO:0006730;GO:0005739;GO:0009058;GO:0005743;GO:0005524;GO:0000166;GO:0046872;GO:0016020;GO:0005737;GO:0005759;GO:0009396;GO:0005829;GO:0006139;GO:0046655;GO:0006536;GO:0004326;GO:0006760;GO:0046901;GO:0031100;GO:0007420;GO:0001889	K01930-ko00790 Folate biosynthesis	KOG2525-Folylpolyglutamate synthase[H]
ENSG00000179632	225.967	93.9844	1.26562	0	0	up	MAF1	MAF1 homolog, negative regulator of RNA polymerase III [Source:HGNC Symbol;Acc:HGNC:24966]	GO:0060077;GO:0048471;GO:0030425;GO:0030424;GO:0005886;GO:0005829;GO:0005634;GO:0050811;GO:0006355;GO:0006351;GO:0005730;GO:0043231;GO:0005737;GO:0016480;GO:0005622;GO:0001030;GO:0001031;GO:0001032;GO:0000994;GO:0070217	-	KOG3104-Mod5 protein sorting/negative effector of RNA Pol III synthesis[K]
ENSG00000084234	20.0954	82.7803	-2.04242	0	0	down	APLP2	amyloid beta precursor like protein 2 [Source:HGNC Symbol;Acc:HGNC:598]	GO:0008201;GO:0046914;GO:0005515;GO:0005886;GO:0010951;GO:0004867;GO:0003677;GO:0016021;GO:0016020;GO:0005634;GO:0007186;GO:0030414;GO:0010466;GO:0042802;GO:0070062;GO:0044267;GO:0002576;GO:0005788;GO:0031092;GO:0043687	-	KOG3540-Beta amyloid precursor protein[R]
ENSG00000108055	1.0834	30.7907	-4.82886	0	0	down	SMC3	structural maintenance of chromosomes 3 [Source:HGNC Symbol;Acc:HGNC:2468]	GO:0034991;GO:0030893;GO:0008278;GO:0005634;GO:0005622;GO:0000800;GO:0051321;GO:0044791;GO:0019827;GO:0036033;GO:0032403;GO:0003682;GO:0005604;GO:0051702;GO:0000278;GO:0005515;GO:0005694;GO:0051276;GO:0006281;GO:0051301;GO:0005654;GO:0005524;GO:0000166;GO:0005737;GO:0007049;GO:0006974;GO:0000922;GO:0000775;GO:0005829;GO:0070840;GO:0007064;GO:0007062;GO:0000785;GO:0016363;GO:0046982;GO:0003777;GO:…	K06669-ko04110 Cell cycle;ko04111 Cell cycle - yeast;ko04113 Meiosis - yeast;ko04114 Oocyte meiosis	KOG0964-Structural maintenance of chromosome protein 3 (sister chromatid cohesion complex Cohesin, subunit SMC3)[D]
ENSG00000171858	6335.31	4912.56	0.366942	0	0	-	RPS21	ribosomal protein S21 [Source:HGNC Symbol;Acc:HGNC:10409]	GO:0005840;GO:0006412;GO:0003735;GO:0005622;GO:0030529;GO:0003723;GO:0022627;GO:0005829;GO:0005654;GO:0047485;GO:0006413;GO:0006364;GO:0000184;GO:0019083;GO:0006614;GO:0000447;GO:0000461;GO:0015935;GO:0005515	K02971-ko03010 Ribosome	KOG3486-40S ribosomal protein S21[J]
ENSG00000156467	10.8997	103.308	-3.24459	0	0	down	UQCRB	ubiquinol-cytochrome c reductase binding protein [Source:HGNC Symbol;Acc:HGNC:12582]	GO:1902600;GO:0005515;GO:0005739;GO:0005743;GO:0055114;GO:0016020;GO:0070469;GO:0008121;GO:0006122;GO:0005750;GO:0009060;GO:0006119;GO:0005746;GO:0034551	K00417-ko00190 Oxidative phosphorylation;ko04260 Cardiac muscle contraction;ko05010 Alzheimer's disease;ko05012 Parkinson's disease;ko05016 Huntington's disease;ko04932 Non-alcoholic fatty liver disease (NAFLD)	KOG3440-Ubiquinol cytochrome c reductase, subunit QCR7[C]
ENSG00000041988	59.0987	1.36899	5.43194	0	0	up	THAP3	THAP domain containing 3 [Source:HGNC Symbol;Acc:HGNC:20855]	GO:0003676;GO:0003677;GO:0046872;GO:0005515	-	-
ENSG00000143947	297.587	660.969	-1.15127	0	0	down	RPS27A	ribosomal protein S27a [Source:HGNC Symbol;Acc:HGNC:10417]	GO:0005515;GO:0005840;GO:0006412;GO:0003735;GO:0030529;GO:0046872;GO:0016020;GO:0005737;GO:0005634;GO:0003723;GO:0044322;GO:0022627;GO:0005615;GO:0038095;GO:0005886;GO:0005730;GO:0016567;GO:0005829;GO:0005789;GO:0070062;GO:0034220;GO:0044267;GO:0061024;GO:0016197;GO:0019058;GO:0075733;GO:0010008;GO:0000165;GO:0000209;GO:0002223;GO:0010972;GO:0016579;GO:0031145;GO:0031146;GO:0033209;GO:0038061;GO:…	K02977-ko03010 Ribosome	KOG0004-Ubiquitin/40S ribosomal protein S27a fusion[J]
ENSG00000007923	1.35783	44.4193	-5.03181	0	0	down	DNAJC11	DnaJ heat shock protein family (Hsp40) member C11 [Source:HGNC Symbol;Acc:HGNC:25570]	GO:0005515;GO:0005739;GO:0070062;GO:0005743	-	KOG0718-Molecular chaperone (DnaJ superfamily)[O]
ENSG00000203896	1.65011	54.3131	-5.04066	0	0	down	LIME1	Lck interacting transmembrane adaptor 1 [Source:HGNC Symbol;Acc:HGNC:26016]	GO:0016021;GO:0016020;GO:0050852;GO:0050853;GO:0005886;GO:0005615;GO:0002376;GO:0002250;GO:0000390;GO:0071008	-	-
ENSG00000002834	63.0267	22.4415	1.4898	0	0	up	LASP1	LIM and SH3 protein 1 [Source:HGNC Symbol;Acc:HGNC:6513]	GO:0030864;GO:0005925;GO:0005737;GO:0006811;GO:0051015;GO:0015075;GO:0005515;GO:0003779;GO:0009967;GO:0034220;GO:0046872;GO:0008270;GO:0006810;GO:0005856;GO:0045296;GO:0070062;GO:0005938;GO:0005070	-	KOG1702-Nebulin repeat protein[Z]
ENSG00000130723	5.935	23.4249	-1.98072	0	0	down	PRRC2B	proline rich coiled-coil 2B [Source:HGNC Symbol;Acc:HGNC:28121]	GO:0005515;GO:0003723;GO:0030154	-	KOG4817-Unnamed protein[X]
ENSG00000213593	4.58967	81.5377	-4.151	0	0	down	TMX2	thioredoxin related transmembrane protein 2 [Source:HGNC Symbol;Acc:HGNC:30739]	GO:0016021;GO:0016020;GO:0005623;GO:0045454;GO:0003674;GO:0008150;GO:0005575	-	KOG0914-Thioredoxin-like protein[O]
ENSG00000215301	3.10427	33.6252	-3.43722	0	0	down	DDX3X	DEAD-box helicase 3, X-linked [Source:HGNC Symbol;Acc:HGNC:2745]	GO:0005515;GO:0005739;GO:0006355;GO:0006351;GO:0003677;GO:0032508;GO:0004386;GO:0016787;GO:0005829;GO:0005634;GO:0005524;GO:0000166;GO:0005852;GO:0016020;GO:0016607;GO:0005737;GO:0003723;GO:0003676;GO:0006915;GO:0022627;GO:0016055;GO:0005741;GO:0045727;GO:0002376;GO:0045087;GO:0005576;GO:0007059;GO:0045944;GO:0045296;GO:0070062;GO:0042254;GO:0006417;GO:0009615;GO:0043065;GO:0010628;GO:0043312;GO:…	K11594-ko04622 RIG-I-like receptor signaling pathway;ko05203 Viral carcinogenesis;ko05161 Hepatitis B	KOG0335-ATP-dependent RNA helicase[A]
ENSG00000010256	167.683	252.429	-0.590141	0	0	-	UQCRC1	ubiquinol-cytochrome c reductase core protein I [Source:HGNC Symbol;Acc:HGNC:12585]	GO:0043209;GO:0005750;GO:0005743;GO:0005739;GO:0043279;GO:0014823;GO:0006122;GO:0032403;GO:1902600;GO:0003824;GO:0046872;GO:0055114;GO:0005829;GO:0016020;GO:0070469;GO:0008270;GO:0031625;GO:0004222;GO:0016485;GO:0009060;GO:0008121;GO:0006119;GO:0005746	K00414-ko00190 Oxidative phosphorylation;ko04260 Cardiac muscle contraction;ko05010 Alzheimer's disease;ko05012 Parkinson's disease;ko05016 Huntington's disease;ko04932 Non-alcoholic fatty liver disease (NAFLD)	KOG0960-Mitochondrial processing peptidase, beta subunit, and related enzymes (insulinase superfamily)[O]
ENSG00000164574	24.143	3.86907	2.64155	0	0	up	GALNT10	polypeptide N-acetylgalactosaminyltransferase 10 [Source:HGNC Symbol;Acc:HGNC:19873]	GO:0005794;GO:0016757;GO:0030246;GO:0016740;GO:0046872;GO:0016021;GO:0016020;GO:0000139;GO:0006486;GO:0016266;GO:0004653;GO:0006493	K00710-ko00512 Mucin type O-glycan biosynthesis	KOG3736-Polypeptide N-acetylgalactosaminyltransferase[O]
ENSG00000214078	420.281	81.1455	2.37277	0	0	up	CPNE1	copine 1 [Source:HGNC Symbol;Acc:HGNC:2314]	GO:0006508;GO:0005886;GO:0042803;GO:0005829;GO:0006355;GO:0006351;GO:0031965;GO:0005654;GO:0016020;GO:0005737;GO:0005634;GO:0030154;GO:0005509;GO:0005515;GO:0070062;GO:0043312;GO:0010629;GO:0005215;GO:0016192;GO:0035577;GO:0006629;GO:0004175;GO:0051897;GO:0051059;GO:0043122;GO:0071277;GO:1901223;GO:0005544;GO:0046474;GO:0043392;GO:1903265;GO:0045666;GO:1990138;GO:0001786	-	KOG1327-Copine[T]
ENSG00000067334	2.5196	35.6459	-3.82247	0	0	down	DNTTIP2	deoxynucleotidyltransferase terminal interacting protein 2 [Source:HGNC Symbol;Acc:HGNC:24013]	GO:0006355;GO:0006351;GO:0005730;GO:0005634;GO:0003723	-	KOG3100-Uncharacterized conserved protein[S]
ENSG00000111203	40.4364	182.749	-2.17614	0	0	down	ITFG2	integrin alpha FG-GAP repeat containing 2 [Source:HGNC Symbol;Acc:HGNC:30879]	GO:0005829;GO:0005654;GO:0002314;GO:0140007;GO:0005765;GO:0007229;GO:1904262;GO:0042149;GO:0034198	-	-
ENSG00000107937	3.4621	32.2995	-3.22179	0	0	down	GTPBP4	GTP binding protein 4 [Source:HGNC Symbol;Acc:HGNC:21535]	GO:0005515;GO:0005525;GO:0031965;GO:0005829;GO:0005730;GO:0005634;GO:0000166;GO:0005794;GO:0016020;GO:0003723;GO:0042254;GO:0005737;GO:0048471;GO:0001649;GO:0031397;GO:0008156;GO:0008285;GO:0022408;GO:0030336;GO:0003924;GO:0050821;GO:0000079;GO:0033342	K06943-ko03008 Ribosome biogenesis in eukaryotes	KOG1490-GTP-binding protein CRFG/NOG1 (ODN superfamily)[R]
ENSG00000108107	1992.78	1939.59	0.0390294	0	0	-	RPL28	ribosomal protein L28 [Source:HGNC Symbol;Acc:HGNC:10330]	GO:0005515;GO:0005840;GO:0006412;GO:0003735;GO:0005622;GO:0030529;GO:0016020;GO:0003723;GO:0005829;GO:0070062;GO:1903146;GO:0006413;GO:0006364;GO:0036464;GO:1903955;GO:0000184;GO:0019083;GO:0006614;GO:0030425;GO:0044297;GO:0022625	K02903-ko03010 Ribosome	KOG3412-60S ribosomal protein L28[J]
ENSG00000015479	0.51512	29.1233	-5.82112	0	0	down	MATR3	matrin 3 [Source:HGNC Symbol;Acc:HGNC:6912]	GO:0005515;GO:0046872;GO:0008270;GO:0016020;GO:0005634;GO:0003723;GO:0003676;GO:0016363;GO:0005198;GO:0010608;GO:0005637	-	-
ENSG00000227500	96.7851	11.7906	3.03715	0	0	up	SCAMP4	secretory carrier membrane protein 4 [Source:HGNC Symbol;Acc:HGNC:30385]	GO:0015031;GO:0016021;GO:0016020;GO:0006810	-	KOG3088-Secretory carrier membrane protein[U]
ENSG00000179295	3.24162	28.6336	-3.14292	0	0	down	PTPN11	protein tyrosine phosphatase, non-receptor type 11 [Source:HGNC Symbol;Acc:HGNC:9644]	GO:0005515;GO:0004721;GO:0016311;GO:0016791;GO:0006470;GO:0004725;GO:0016787;GO:0005737;GO:0005634;GO:0036092;GO:0050900;GO:0046854;GO:0005829;GO:0035335;GO:0070374;GO:0030168;GO:0046934;GO:0007411;GO:0014066;GO:0048015;GO:0016303;GO:0007507;GO:0033628;GO:0008543;GO:0031295;GO:0048013;GO:0071364;GO:0043254;GO:0007173;GO:0005158;GO:0060338;GO:0007420;GO:0060325;GO:0038127;GO:2001275;GO:0048806;GO:…	K07293-ko04014 Ras signaling pathway;ko04013 MAPK signaling pathway - fly;ko04630 Jak-STAT signaling pathway;ko04072 Phospholipase D signaling pathway;ko04650 Natural killer cell mediated cytotoxicity;ko04670 Leukocyte transendothelial migration;ko04920 Adipocytokine signaling pathway;ko04722 Neurotrophin signaling pathway;ko04360 Axon guidance;ko05205 Proteoglycans in cancer;ko05220 Chronic myel…	KOG0790-Protein tyrosine phosphatase Corkscrew and related SH2 domain enzymes[T]
ENSG00000131711	5.84422	20.8602	-1.83567	0	0	down	MAP1B	microtubule associated protein 1B [Source:HGNC Symbol;Acc:HGNC:6836]	GO:0007399;GO:0008017;GO:0000226;GO:0005874;GO:0014069;GO:0005829;GO:0001750;GO:0061162;GO:0048675;GO:0047497;GO:0045773;GO:0032387;GO:0016358;GO:0007409;GO:0001578;GO:0005515;GO:0005737;GO:0030054;GO:0045202;GO:0005856;GO:0042995;GO:0043197;GO:0005875;GO:0005198;GO:0009987;GO:0005886	-	KOG3592-Microtubule-associated proteins[Z]
ENSG00000277791	1496.14	1061.55	0.49508	0	0	-	PSMB3	proteasome subunit beta 3 [Source:HGNC Symbol;Acc:HGNC:9540]	GO:0000502;GO:0006508;GO:0008233;GO:0005515;GO:0016787;GO:0005737;GO:0005634;GO:0043161;GO:0004175;GO:0004298;GO:0051603;GO:0005839;GO:0038095;GO:0019774;GO:0005829;GO:0070062;GO:0000165;GO:0000209;GO:0002223;GO:0002479;GO:0006521;GO:0010972;GO:0016579;GO:0031145;GO:0031146;GO:0033209;GO:0038061;GO:0043488;GO:0050852;GO:0051437;GO:0055085;GO:0060071;GO:0061418;GO:0090090;GO:0090263;GO:0005654;GO:…	K02735-ko03050 Proteasome	KOG0180-20S proteasome, regulatory subunit beta type PSMB3/PUP3[O]
ENSG00000197756	1246.91	314.214	1.98854	0	0	up	RPL37A	ribosomal protein L37a [Source:HGNC Symbol;Acc:HGNC:10348]	GO:0005515;GO:0005840;GO:0006412;GO:0003735;GO:0005622;GO:0030529;GO:0046872;GO:0005634;GO:0003723;GO:0005925;GO:0005829;GO:0070062;GO:0006413;GO:0006364;GO:0000184;GO:0019083;GO:0006614;GO:0022625	K02921-ko03010 Ribosome	KOG0402-60S ribosomal protein L37[J]
ENSG00000178719	9.00808	79.22	-3.13657	0	0	down	GRINA	glutamate ionotropic receptor NMDA type subunit associated protein 1 [Source:HGNC Symbol;Acc:HGNC:4589]	GO:0005794;GO:0005783;GO:1902236;GO:0032469;GO:0044325;GO:0016021;GO:0016020	-	KOG2322-N-methyl-D-aspartate receptor glutamate-binding subunit[T]
ENSG00000250571	49.002	9.33035	2.39284	0	0	up	GLI4	GLI family zinc finger 4 [Source:HGNC Symbol;Acc:HGNC:4320]	GO:0003677;GO:0046872;GO:0005634;GO:0003676;GO:0003700;GO:0006355;GO:0003674;GO:0008150	-	KOG1721-FOG: Zn-finger[R]
ENSG00000187514	75.3982	317.219	-2.07288	0	0	down	PTMA	prothymosin, alpha [Source:HGNC Symbol;Acc:HGNC:9623]	GO:0005654;GO:0005829;GO:0033613;GO:0005634;GO:0005515;GO:0070062;GO:0006351	K13784-ko05169 Epstein-Barr virus infection	-
ENSG00000196262	1365.44	1654.23	-0.276796	0	0	-	PPIA	peptidylprolyl isomerase A [Source:HGNC Symbol;Acc:HGNC:9253]	GO:0016018;GO:0005515;GO:0005576;GO:0006457;GO:0000413;GO:0003755;GO:0005829;GO:0016853;GO:0016020;GO:0005737;GO:0005634;GO:0003723;GO:0005615;GO:0005925;GO:0050900;GO:0070062;GO:0019058;GO:0043312;GO:0016032;GO:0034774;GO:1904813;GO:0031982;GO:0050714;GO:0051082;GO:0045070;GO:0019076;GO:0075713;GO:0019064;GO:0030260;GO:0019068;GO:0046790;GO:0006278;GO:0019061;GO:0034389;GO:0045069;GO:0043209;GO:…	K03767-ko01503 Cationic antimicrobial peptide (CAMP) resistance	KOG0865-Cyclophilin type peptidyl-prolyl cis-trans isomerase[O]
ENSG00000044574	21.7221	77.8287	-1.84114	0	0	down	HSPA5	heat shock protein family A (Hsp70) member 5 [Source:HGNC Symbol;Acc:HGNC:5238]	GO:0043209;GO:0034663;GO:0016020;GO:0009986;GO:0005886;GO:0005793;GO:0005790;GO:0005789;GO:0005788;GO:0005783;GO:0005739;GO:0005737;GO:1990090;GO:1904313;GO:1901998;GO:0097501;GO:0071353;GO:0071320;GO:0071287;GO:0071277;GO:0071236;GO:0051603;GO:0051402;GO:0042220;GO:0035690;GO:0034976;GO:0031398;GO:0030512;GO:0030182;GO:0021680;GO:0021589;GO:0010976;GO:0009314;GO:0006987;GO:0006983;GO:0051787;GO:…	K09490-ko03060 Protein export;ko04141 Protein processing in endoplasmic reticulum;ko04918 Thyroid hormone synthesis;ko05020 Prion diseases	KOG0101-Molecular chaperones HSP70/HSC70, HSP70 superfamily[O]
ENSG00000110700	351.578	844.926	-1.26498	0	0	down	RPS13	ribosomal protein S13 [Source:HGNC Symbol;Acc:HGNC:10386]	GO:0005840;GO:0006412;GO:0003735;GO:0022627;GO:1990932;GO:0048027;GO:0005515;GO:0005622;GO:0030529;GO:0016020;GO:0005634;GO:0003723;GO:0005925;GO:0005730;GO:0003729;GO:0005829;GO:0070062;GO:0005654;GO:0031012;GO:0006413;GO:0006364;GO:0000184;GO:0019083;GO:0006614;GO:0033119;GO:0070181	K02953-ko03010 Ribosome	KOG0400-40S ribosomal protein S13[J]
ENSG00000244687	0.0001	135.053	-20.3651	0	0	down	UBE2V1	ubiquitin conjugating enzyme E2 V1 [Source:HGNC Symbol;Acc:HGNC:12494]	GO:0005515;GO:0006355;GO:0005654;GO:0005634;GO:0030154;GO:0045893;GO:0038095;GO:0031625;GO:0005829;GO:0070062;GO:0002223;GO:0050852;GO:0061630;GO:0043234;GO:0006301;GO:0070534;GO:0005737;GO:0007254;GO:0043123;GO:0051092;GO:0070423;GO:0000187;GO:0000151;GO:0006282;GO:0035370;GO:0000209;GO:0031371	K10704-ko04624 Toll and Imd signaling pathway	KOG0896-Ubiquitin-conjugating enzyme E2[O]
ENSG00000006118	14.1889	79.0852	-2.47865	0	0	down	TMEM132A	transmembrane protein 132A [Source:HGNC Symbol;Acc:HGNC:31092]	GO:0005794;GO:0005789;GO:0005783;GO:0016021;GO:0016020;GO:0000139;GO:0003674;GO:0008150;GO:0070062;GO:0044267;GO:0005788;GO:0043687	-	KOG4789-Uncharacterized conserved protein[S]
ENSG00000205339	1.89292	22.0373	-3.54126	0	0	down	IPO7	importin 7 [Source:HGNC Symbol;Acc:HGNC:9852]	GO:0045087;GO:0006606;GO:0042393;GO:0050790;GO:0005654;GO:0005829;GO:0015031;GO:0006886;GO:0016020;GO:0005737;GO:0005634;GO:0006810;GO:0008536;GO:0005515;GO:0016032;GO:0007165;GO:0005215;GO:0030695;GO:0005643;GO:0046332;GO:0005622	K20223-ko04013 MAPK signaling pathway - fly	KOG1991-Nuclear transport receptor RANBP7/RANBP8 (importin beta superfamily)[YU]
ENSG00000164754	2.66966	39.0537	-3.87073	0	0	down	RAD21	RAD21 cohesin complex component [Source:HGNC Symbol;Acc:HGNC:9811]	GO:0005634;GO:0008278;GO:0000794;GO:0000785;GO:0045841;GO:0010972;GO:0032403;GO:0001228;GO:0005515;GO:0005694;GO:0051301;GO:0006366;GO:0005654;GO:0016020;GO:0006915;GO:0007049;GO:0006281;GO:0006974;GO:0045944;GO:0000228;GO:0003682;GO:0007059;GO:0000775;GO:0005829;GO:0007062;GO:0006357;GO:0006310;GO:0007131;GO:0006302;GO:0045876;GO:0071168;GO:0000798	K06670-ko04110 Cell cycle;ko04111 Cell cycle - yeast	KOG1213-Sister chromatid cohesion complex Cohesin, subunit RAD21/SCC1[D]
ENSG00000198763	356.124	745.998	-1.06679	0	0	down	MT-ND2	mitochondrially encoded NADH:ubiquinone oxidoreductase core subunit 2 [Source:HGNC Symbol;Acc:HGNC:7456]	GO:0014069;GO:0005739;GO:0072593;GO:0035255;GO:0019901;GO:0005743;GO:0055114;GO:0016491;GO:0016021;GO:0016020;GO:0070469;GO:0008137;GO:0006120;GO:0032981;GO:0005747	K03879-ko00190 Oxidative phosphorylation;ko05012 Parkinson's disease	KOG4668-NADH dehydrogenase subunits 2, 5, and related proteins[C]
ENSG00000123144	41.8638	234.597	-2.48641	0	0	down	C19orf43	chromosome 19 open reading frame 43 [Source:HGNC Symbol;Acc:HGNC:28424]	GO:0005515	-	-
ENSG00000108848	4.75505	127.49	-4.74478	0	0	down	LUC7L3	LUC7 like 3 pre-mRNA splicing factor [Source:HGNC Symbol;Acc:HGNC:24309]	GO:0003677;GO:0005654;GO:0016607;GO:0005634;GO:0008380;GO:0006397;GO:0003729;GO:0003723;GO:0005685;GO:0006376;GO:0005515;GO:0071004	-	KOG0796-Spliceosome subunit[A]
ENSG00000116649	392.676	167.55	1.22875	0	0	up	SRM	spermidine synthase [Source:HGNC Symbol;Acc:HGNC:11296]	GO:0005515;GO:0042803;GO:0003824;GO:0016740;GO:0042802;GO:0006595;GO:0005829;GO:0006596;GO:0008295;GO:0004766	K00797-ko00270 Cysteine and methionine metabolism;ko00330 Arginine and proline metabolism;ko00410 beta-Alanine metabolism;ko00480 Glutathione metabolism	KOG1562-Spermidine synthase[E]
ENSG00000173457	159.873	455.9	-1.51179	0	0	down	PPP1R14B	protein phosphatase 1 regulatory inhibitor subunit 14B [Source:HGNC Symbol;Acc:HGNC:9057]	GO:0005737;GO:0042325;GO:0019888;GO:0019212;GO:0043086;GO:0050790;GO:0004864;GO:0045087	-	-
ENSG00000125841	56.7837	3.51406	4.01427	0	0	up	NRSN2	neurensin 2 [Source:HGNC Symbol;Acc:HGNC:16229]	GO:0016021;GO:0016020;GO:0030133;GO:0043025;GO:0031410;GO:0003674;GO:0008150;GO:0005886	-	-
ENSG00000198034	1178.4	894.104	0.398312	0	0	-	RPS4X	ribosomal protein S4, X-linked [Source:HGNC Symbol;Acc:HGNC:10424]	GO:0005840;GO:0006412;GO:0003735;GO:0005622;GO:0030529;GO:0016020;GO:0005737;GO:0003723;GO:0022627;GO:0007275;GO:0045727;GO:0005925;GO:0005829;GO:0070062;GO:0005654;GO:0031012;GO:0019843;GO:0005515;GO:0008284;GO:0006413;GO:0006364;GO:0036464;GO:0000184;GO:0019083;GO:0006614;GO:0005844;GO:0015935	K02987-ko03010 Ribosome	KOG0378-40S ribosomal protein S4[J]
ENSG00000185340	1.14074	39.0727	-5.09811	0	0	down	GAS2L1	growth arrest specific 2 like 1 [Source:HGNC Symbol;Acc:HGNC:16955]	GO:0005856;GO:0008017;GO:0008093;GO:0005737;GO:0007050;GO:0009267;GO:0046966;GO:0097067	-	KOG0516-Dystonin, GAS (Growth-arrest-specific protein), and related proteins[Z]
ENSG00000170373	1165.6	741.18	0.653173	0	0	-	CST1	cystatin SN [Source:HGNC Symbol;Acc:HGNC:2473]	GO:0005576;GO:0005515;GO:0010951;GO:0005615;GO:0004869;GO:0030414;GO:0010466;GO:0001580	K13897-ko04970 Salivary secretion	-
ENSG00000085998	40.2109	32.2137	0.319911	0	0	-	POMGNT1	protein O-linked mannose N-acetylglucosaminyltransferase 1 (beta 1,2-) [Source:HGNC Symbol;Acc:HGNC:19139]	GO:0005515;GO:0005794;GO:0006486;GO:0016757;GO:0016740;GO:0016021;GO:0016020;GO:0000139;GO:0008375;GO:0006493;GO:0047223	K09666-ko00514 Other types of O-glycan biosynthesis	-
ENSG00000104774	67.165	326.602	-2.28175	0	0	down	MAN2B1	mannosidase alpha class 2B member 1 [Source:HGNC Symbol;Acc:HGNC:6826]	GO:0016798;GO:0004553;GO:0008152;GO:0005975;GO:0003824;GO:0016787;GO:0030246;GO:0046872;GO:0008270;GO:0005615;GO:0005764;GO:0005576;GO:0004559;GO:0015923;GO:0006013;GO:0070062;GO:0043312;GO:0006464;GO:0009313;GO:0043202;GO:0035578;GO:0006517	K12311-ko00511 Other glycan degradation;ko04142 Lysosome	KOG1959-Glycosyl hydrolase, family 38 - alpha-mannosidase[G]
ENSG00000106665	2.09781	28.4427	-3.76111	0	0	down	CLIP2	CAP-Gly domain containing linker protein 2 [Source:HGNC Symbol;Acc:HGNC:2586]	GO:0005737;GO:0005856;GO:0005874;GO:0008017;GO:0005875;GO:0035371;GO:0005881;GO:0051010	-	KOG4568-Cytoskeleton-associated protein and related proteins[ZR]
ENSG00000142864	22.3074	76.8127	-1.78382	0	0	down	SERBP1	SERPINE1 mRNA binding protein 1 [Source:HGNC Symbol;Acc:HGNC:17860]	GO:0005515;GO:0005829;GO:0016020;GO:0005737;GO:0005634;GO:0003723;GO:0048471;GO:0045296;GO:0070062;GO:0003730;GO:0043488;GO:0005886;GO:0042981	-	KOG2945-Predicted RNA-binding protein[R]
ENSG00000176087	36.6197	0.160378	7.835	0	0	up	SLC35A4	solute carrier family 35 member A4 [Source:HGNC Symbol;Acc:HGNC:20753]	GO:0005794;GO:0016021;GO:0016020;GO:0006810;GO:0000139;GO:0008643;GO:0005351;GO:0015992;GO:0032056	-	KOG2234-Predicted UDP-galactose transporter[G]
ENSG00000087086	1106.8	728.963	0.602473	0	0	-	FTL	ferritin light chain [Source:HGNC Symbol;Acc:HGNC:3999]	GO:0005515;GO:0046872;GO:0016020;GO:0008199;GO:0006826;GO:0006879;GO:0005506;GO:0005576;GO:0042802;GO:0005829;GO:0070062;GO:0043312;GO:0035578;GO:0055072;GO:0006880;GO:0008043;GO:0044754	K13625-ko04978 Mineral absorption	-
ENSG00000156802	3.58959	20.4819	-2.51246	0	0	down	ATAD2	ATPase family, AAA domain containing 2 [Source:HGNC Symbol;Acc:HGNC:30123]	GO:0006355;GO:0006351;GO:0016787;GO:0005654;GO:0005524;GO:0000166;GO:0005634;GO:0016887;GO:0045893;GO:0006325;GO:0003682;GO:0045944;GO:0070062;GO:0042393;GO:0006357;GO:0031936	-	KOG0732-AAA+-type ATPase containing the bromodomain[O]
ENSG00000126267	1580.74	1026.96	0.622227	0	0	-	COX6B1	cytochrome c oxidase subunit 6B1 [Source:HGNC Symbol;Acc:HGNC:2280]	GO:0005743;GO:0005739;GO:1902600;GO:0004129;GO:0005758;GO:0021762;GO:0006123	K02267-ko00190 Oxidative phosphorylation;ko04260 Cardiac muscle contraction;ko05010 Alzheimer's disease;ko05012 Parkinson's disease;ko05016 Huntington's disease;ko04932 Non-alcoholic fatty liver disease (NAFLD)	KOG3057-Cytochrome c oxidase, subunit VIb/COX12[C]
ENSG00000147403	606.99	670.753	-0.144109	0	0	-	RPL10	ribosomal protein L10 [Source:HGNC Symbol;Acc:HGNC:10298]	GO:0043066;GO:0005790;GO:0000122;GO:0005634;GO:0005515;GO:0043234;GO:0005840;GO:0006412;GO:0003735;GO:0005622;GO:0030529;GO:0016020;GO:0003723;GO:0000027;GO:0005829;GO:0005783;GO:0006413;GO:0006364;GO:0000184;GO:0019083;GO:0006614;GO:0022625	K02866-ko03010 Ribosome	KOG0857-60s ribosomal protein L10[J]
ENSG00000113013	8.2555	86.3871	-3.38739	0	0	down	HSPA9	heat shock protein family A (Hsp70) member 9 [Source:HGNC Symbol;Acc:HGNC:5244]	GO:0043209;GO:0005759;GO:0005739;GO:1903707;GO:1902037;GO:0006611;GO:0019899;GO:0005515;GO:0006457;GO:0005524;GO:0000166;GO:0005634;GO:0003723;GO:0030218;GO:0051082;GO:0005925;GO:0005730;GO:0070062;GO:0031012;GO:0043066;GO:0005737;GO:0042645;GO:0031625;GO:0045647	K04043-ko03018 RNA degradation;ko04212 Longevity regulating pathway - worm;ko05152 Tuberculosis	KOG0102-Molecular chaperones mortalin/PBP74/GRP75, HSP70 superfamily[O]
ENSG00000175573	4.17964	70.8458	-4.08323	0	0	down	C11orf68	chromosome 11 open reading frame 68 [Source:HGNC Symbol;Acc:HGNC:28801]	GO:0005515;GO:0003723	-	-
ENSG00000284526	0.0001	45.8721	-18.8073	0	0	down	AC015802.6	-	-	-	-
ENSG00000138119	10.9449	35.6731	-1.70459	0	0	down	MYOF	myoferlin [Source:HGNC Symbol;Acc:HGNC:3656]	GO:0016021;GO:0007520;GO:0005886;GO:0043231;GO:0016020;GO:0005634;GO:0005901;GO:0030659;GO:0031410;GO:0005515;GO:0070062;GO:0005635;GO:0031965;GO:0006936;GO:0005543;GO:0001778;GO:0008015;GO:0034605;GO:0030947	-	KOG1326-Membrane-associated protein FER-1 and related ferlins, contain multiple C2 domains[M]
ENSG00000102119	6.53756	94.5172	-3.85375	0	0	down	EMD	emerin [Source:HGNC Symbol;Acc:HGNC:3331]	GO:0005635;GO:0005634;GO:0035914;GO:0005654;GO:0005737;GO:0005515;GO:0003779;GO:0031965;GO:0005783;GO:0016021;GO:0016020;GO:0005874;GO:0045296;GO:0005637;GO:0006936;GO:0048487;GO:0007517;GO:0007077;GO:0071363;GO:0035414;GO:0060828;GO:0007084;GO:0046827;GO:0048147;GO:0005640	K12569-ko05410 Hypertrophic cardiomyopathy (HCM);ko05412 Arrhythmogenic right ventricular cardiomyopathy (ARVC);ko05414 Dilated cardiomyopathy (DCM)	-
ENSG00000107223	3320.67	2673.33	0.312838	0	0	-	EDF1	endothelial differentiation related factor 1 [Source:HGNC Symbol;Acc:HGNC:3164]	GO:0005515;GO:0043565;GO:0006355;GO:0006351;GO:0003677;GO:0005829;GO:0005730;GO:0005634;GO:0005737;GO:0003723;GO:0007275;GO:0030154;GO:0003713;GO:0045893;GO:0005516;GO:0070062;GO:0005622;GO:0019216;GO:0045446;GO:0005669;GO:0043388	-	KOG3398-Transcription factor MBF1[K]
ENSG00000170889	3144.9	2672.95	0.23458	0	0	-	RPS9	ribosomal protein S9 [Source:HGNC Symbol;Acc:HGNC:10442]	GO:0022627;GO:1990932;GO:0005515;GO:0015935;GO:0005840;GO:0006412;GO:0003735;GO:0005622;GO:0030529;GO:0016020;GO:0005737;GO:0005634;GO:0003723;GO:0019843;GO:0005925;GO:0005730;GO:0005829;GO:0070062;GO:0005654;GO:0008284;GO:0006413;GO:0006364;GO:0000184;GO:0019083;GO:0006614;GO:0045182;GO:0045903	K02997-ko03010 Ribosome	KOG3301-Ribosomal protein S4[J]
ENSG00000166595	378.131	130.158	1.53863	0	0	up	FAM96B	family with sequence similarity 96 member B [Source:HGNC Symbol;Acc:HGNC:24261]	GO:0005515;GO:0005654;GO:0005829;GO:0005737;GO:0005634;GO:0005856;GO:0005819;GO:0007059;GO:0071817;GO:0097361;GO:0016226	-	KOG3381-Uncharacterized conserved protein[S]
ENSG00000197114	5.32655	65.4434	-3.61897	0	0	down	ZGPAT	zinc finger CCCH-type and G-patch domain containing [Source:HGNC Symbol;Acc:HGNC:15948]	GO:0005515;GO:0005886;GO:0003700;GO:0006355;GO:0006351;GO:0003677;GO:0046872;GO:0005634;GO:0003676;GO:0000978;GO:0001078;GO:0000122;GO:0043565;GO:0045892;GO:0007175	-	KOG2185-Predicted RNA-processing protein, contains G-patch domain[A]
ENSG00000124172	358.91	562.96	-0.649412	0	0	-	ATP5E	ATP synthase, H+ transporting, mitochondrial F1 complex, epsilon subunit [Source:HGNC Symbol;Acc:HGNC:838]	GO:0042407;GO:0006811;GO:0005739;GO:0005743;GO:0016787;GO:0016020;GO:0006810;GO:0099132;GO:0015992;GO:0046933;GO:0015986;GO:0005759;GO:0006754;GO:0045261;GO:0016887;GO:0022857;GO:0042776;GO:0005753;GO:0000275	K02135-ko00190 Oxidative phosphorylation;ko05010 Alzheimer's disease;ko05012 Parkinson's disease;ko05016 Huntington's disease	KOG3495-Mitochondrial F1F0-ATP synthase, subunit epsilon/ATP15[C]
ENSG00000165732	0.213096	20.7673	-6.60667	0	0	down	DDX21	DExD-box helicase 21 [Source:HGNC Symbol;Acc:HGNC:2744]	GO:0043330;GO:0009615;GO:0003725;GO:0005515;GO:0006351;GO:0004386;GO:0016787;GO:0005730;GO:0005634;GO:0005524;GO:0000166;GO:0016020;GO:0003723;GO:0003676;GO:0005654;GO:0006364;GO:0006366;GO:0010501;GO:0019843;GO:0045815;GO:0004004;GO:0001649;GO:0097322;GO:0030515	-	KOG0331-ATP-dependent RNA helicase[A]
ENSG00000185000	36.7162	14.0473	1.38613	0	0	up	DGAT1	diacylglycerol O-acyltransferase 1 [Source:HGNC Symbol;Acc:HGNC:2843]	GO:0016021;GO:0016020;GO:0004144;GO:0008374;GO:0019432;GO:0043231;GO:0055089;GO:0046339;GO:0035336;GO:0019915;GO:0003846;GO:0005515;GO:0016746;GO:0005789;GO:0005783;GO:0016740;GO:0042572;GO:0005886;GO:0043312;GO:0035579;GO:0050252;GO:0006641;GO:0034379;GO:0036155;GO:0046486	K11155-ko00561 Glycerolipid metabolism;ko00830 Retinol metabolism;ko04975 Fat digestion and absorption	KOG0380-Sterol O-acyltransferase/Diacylglycerol O-acyltransferase[I]
ENSG00000164924	5.58401	40.6334	-2.86329	0	0	down	YWHAZ	tyrosine 3-monooxygenase/tryptophan 5-monooxygenase activation protein zeta [Source:HGNC Symbol;Acc:HGNC:12855]	GO:0044325;GO:0005515;GO:0042470;GO:0019904;GO:0055114;GO:0004497;GO:0005737;GO:0005634;GO:0003723;GO:0005615;GO:0005925;GO:0042802;GO:0005829;GO:0045296;GO:0070062;GO:0061024;GO:0072562;GO:0043488;GO:0005654;GO:0007165;GO:0008134;GO:0030168;GO:0043066;GO:0031982;GO:0051683;GO:0090168;GO:0019901;GO:1900740;GO:0031625;GO:0030659;GO:0016310;GO:0016301;GO:0005739;GO:0010941;GO:0006605	K16197-ko04013 MAPK signaling pathway - fly;ko04390 Hippo signaling pathway;ko04391 Hippo signaling pathway -fly;ko04151 PI3K-Akt signaling pathway;ko04110 Cell cycle;ko04114 Oocyte meiosis;ko04212 Longevity regulating pathway - worm;ko05203 Viral carcinogenesis;ko05161 Hepatitis B;ko05169 Epstein-Barr virus infection	KOG0841-Multifunctional chaperone (14-3-3 family)[O]
ENSG00000134333	49.0991	166.961	-1.76574	0	0	down	LDHA	lactate dehydrogenase A [Source:HGNC Symbol;Acc:HGNC:6535]	GO:0005515;GO:0016616;GO:0005975;GO:0006096;GO:0003824;GO:0055114;GO:0016491;GO:0016020;GO:0005737;GO:0005634;GO:0019752;GO:0004459;GO:0005829;GO:0045296;GO:0070062;GO:0006090;GO:0016021;GO:0051591;GO:0048569;GO:0043627;GO:0043065;GO:0042542;GO:0042493;GO:0019674;GO:0014070;GO:0009749;GO:0007584;GO:0006089;GO:0001666;GO:0051287;GO:0042802;GO:0019900;GO:0004457	K00016-ko00010 Glycolysis / Gluconeogenesis;ko00620 Pyruvate metabolism;ko00640 Propanoate metabolism;ko00270 Cysteine and methionine metabolism;ko04922 Glucagon signaling pathway	KOG1495-Lactate dehydrogenase[C]
ENSG00000182544	51.7966	0.296022	7.45101	0	0	up	MFSD5	major facilitator superfamily domain containing 5 [Source:HGNC Symbol;Acc:HGNC:28156]	GO:0016021;GO:0016020;GO:0015098;GO:0015689;GO:0005515;GO:0005886;GO:0006811;GO:0006810	-	KOG4332-Predicted sugar transporter[G]
ENSG00000130402	35.2954	90.8672	-1.36428	0	0	down	ACTN4	actinin alpha 4 [Source:HGNC Symbol;Acc:HGNC:166]	GO:0043234;GO:0043005;GO:0030863;GO:0031143;GO:0005911;GO:0030018;GO:0005903;GO:0005737;GO:0005634;GO:0005622;GO:0001725;GO:1902396;GO:0070830;GO:0051272;GO:0051017;GO:0051271;GO:0048549;GO:0042981;GO:0001666;GO:0051015;GO:0047485;GO:0032403;GO:0016604;GO:0005515;GO:0042803;GO:0031490;GO:0003779;GO:0030529;GO:0005509;GO:0005829;GO:0046872;GO:0015031;GO:0006810;GO:0003723;GO:0048471;GO:0005615;GO:…	K05699-ko04810 Regulation of actin cytoskeleton;ko04510 Focal adhesion;ko04520 Adherens junction;ko04530 Tight junction;ko04670 Leukocyte transendothelial migration;ko05203 Viral carcinogenesis;ko05322 Systemic lupus erythematosus;ko05412 Arrhythmogenic right ventricular cardiomyopathy (ARVC);ko05146 Amoebiasis	KOG0035-Ca2+-binding actin-bundling protein (actinin), alpha chain (EF-Hand protein superfamily)[Z]
ENSG00000134955	3.09086	47.327	-3.93658	0	0	down	SLC37A2	solute carrier family 37 member 2 [Source:HGNC Symbol;Acc:HGNC:20644]	GO:0015760;GO:0015297;GO:0005789;GO:0005783;GO:0055085;GO:0005215;GO:0006810;GO:0016021;GO:0016020;GO:0008643;GO:0070062;GO:0030176;GO:0061513;GO:0035435	-	-
ENSG00000132963	33.3631	154.148	-2.208	0	0	down	POMP	proteasome maturation protein [Source:HGNC Symbol;Acc:HGNC:20330]	GO:0005737;GO:0005634;GO:0005515;GO:0005829;GO:0043231;GO:0031090;GO:0005783;GO:0016020;GO:0016607;GO:0043248	K11599-ko03050 Proteasome	KOG3061-Proteasome maturation factor[O]
ENSG00000137404	6.55495	70.1941	-3.42069	0	0	down	NRM	nurim (nuclear envelope membrane protein) [Source:HGNC Symbol;Acc:HGNC:8003]	GO:0031965;GO:0016021;GO:0016020;GO:0005515;GO:0005634;GO:0003674;GO:0008150;GO:0005637;GO:0005635	-	-
ENSG00000096746	4.70153	94.7595	-4.33307	0	0	down	HNRNPH3	heterogeneous nuclear ribonucleoprotein H3 [Source:HGNC Symbol;Acc:HGNC:5043]	GO:0005681;GO:0005515;GO:0030529;GO:0019013;GO:0005654;GO:0005634;GO:0006397;GO:0003723;GO:0003676;GO:0000398;GO:0030855;GO:0008380;GO:0006396	-	KOG4211-Splicing factor hnRNP-F and related RNA-binding proteins[A]
ENSG00000145592	836.006	515.147	0.698528	0	0	-	RPL37	ribosomal protein L37 [Source:HGNC Symbol;Acc:HGNC:10347]	GO:0005840;GO:0006412;GO:0003735;GO:0005622;GO:0030529;GO:0046872;GO:0003723;GO:0005829;GO:0019843;GO:0006413;GO:0006364;GO:0000184;GO:0019083;GO:0006614;GO:0022625	K02922-ko03010 Ribosome	KOG3475-60S ribosomal protein L37[J]
ENSG00000168615	6.36937	30.3808	-2.25394	0	0	down	ADAM9	ADAM metallopeptidase domain 9 [Source:HGNC Symbol;Acc:HGNC:216]	GO:0016323;GO:0009986;GO:0034616;GO:0005576;GO:0006508;GO:0008233;GO:0005515;GO:0005886;GO:0016787;GO:0046872;GO:0016021;GO:0016020;GO:0004222;GO:0008237;GO:0005925;GO:0070062;GO:0071222;GO:0005615;GO:0016477;GO:0033630;GO:0006509;GO:0034612;GO:0042117;GO:0051088;GO:0017124;GO:0051044;GO:0007179;GO:0042542;GO:0031233;GO:0050714;GO:0051384;GO:0007160;GO:0051592;GO:0005178;GO:0033627;GO:0005080;GO:…	-	KOG3607-Meltrins, fertilins and related Zn-dependent metalloproteinases of the ADAMs family[O]
ENSG00000169228	66.8314	4.30679	3.95584	0	0	up	RAB24	RAB24, member RAS oncogene family [Source:HGNC Symbol;Acc:HGNC:9765]	GO:0003924;GO:0005829;GO:0005525;GO:0000166;GO:0015031;GO:0016020;GO:0005737;GO:0006810;GO:0006914;GO:0005886;GO:0005515;GO:0043312;GO:0030667;GO:0005776;GO:0005739	-	KOG0092-GTPase Rab5/YPT51 and related small G protein superfamily GTPases[U]
ENSG00000167460	33.5586	129.243	-1.94533	0	0	down	TPM4	tropomyosin 4 [Source:HGNC Symbol;Acc:HGNC:12013]	GO:0031941;GO:0030863;GO:0005737;GO:0002102;GO:0003779;GO:0046872;GO:0016020;GO:0005856;GO:0005925;GO:0005509;GO:0005829;GO:0070062;GO:0051015;GO:0007015;GO:0005515;GO:0001725;GO:0006936;GO:0006928;GO:0008307;GO:0030049;GO:0001649;GO:0005884;GO:0005862	K10375-ko04260 Cardiac muscle contraction;ko04261 Adrenergic signaling in cardiomyocytes;ko05410 Hypertrophic cardiomyopathy (HCM);ko05414 Dilated cardiomyopathy (DCM)	-
ENSG00000157895	19.5814	1.3008	3.91202	0	0	up	C12orf43	chromosome 12 open reading frame 43 [Source:HGNC Symbol;Acc:HGNC:25719]	GO:0005515	-	-
ENSG00000102390	1.57502	77.1698	-5.61459	0	0	down	PBDC1	polysaccharide biosynthesis domain containing 1 [Source:HGNC Symbol;Acc:HGNC:28790]	GO:0005737;GO:0003674;GO:0008150;GO:0005575	-	KOG4093-Uncharacterized conserved protein[S]
ENSG00000165688	3.70128	46.5455	-3.65255	0	0	down	PMPCA	peptidase, mitochondrial processing alpha subunit [Source:HGNC Symbol;Acc:HGNC:18667]	GO:0005739;GO:0006851;GO:0006508;GO:0008233;GO:0003824;GO:0046872;GO:0005743;GO:0016787;GO:0016020;GO:0005615;GO:0004222;GO:0005759;GO:0008237;GO:0008270;GO:0006627	-	KOG2067-Mitochondrial processing peptidase, alpha subunit[O]
ENSG00000160917	52.1998	3.36341	3.95605	0	0	up	CPSF4	cleavage and polyadenylation specific factor 4 [Source:HGNC Symbol;Acc:HGNC:2327]	GO:0005515;GO:0046872;GO:0005654;GO:0008270;GO:0043231;GO:0005634;GO:0006397;GO:0003723;GO:0003676;GO:0090502;GO:0004521;GO:0006378;GO:0098789;GO:0016032;GO:0006369;GO:0031124;GO:0000398;GO:0006406;GO:0006388;GO:0046778;GO:0005847	K14404-ko03015 mRNA surveillance pathway;ko05164 Influenza A	KOG1040-Polyadenylation factor I complex, subunit, Yth1 (CPSF subunit)[A]
ENSG00000260032	2.0577	22.1633	-3.42906	0	0	down	NORAD	non-coding RNA activated by DNA damage [Source:HGNC Symbol;Acc:HGNC:44311]	-	-	-
ENSG00000167685	1.33474	39.9824	-4.90474	0	0	down	ZNF444	zinc finger protein 444 [Source:HGNC Symbol;Acc:HGNC:16052]	GO:0006351;GO:0003700;GO:0006355;GO:0005634;GO:0003677;GO:0046872;GO:0003676;GO:0006357;GO:0000981	-	KOG1721-FOG: Zn-finger[R]
ENSG00000125944	0.292074	14.949	-5.67758	0	0	down	HNRNPR	heterogeneous nuclear ribonucleoprotein R [Source:HGNC Symbol;Acc:HGNC:5047]	GO:0016070;GO:0005681;GO:0005515;GO:0030529;GO:0043231;GO:0005783;GO:0005654;GO:0005737;GO:0005634;GO:0008380;GO:0006397;GO:0003723;GO:0003676;GO:0000398;GO:0071013;GO:0043679;GO:0030426;GO:0030425;GO:0061157;GO:0061014;GO:0043086;GO:0007623;GO:0003730;GO:0019013	-	KOG0117-Heterogeneous nuclear ribonucleoprotein R (RRM superfamily)[A]
ENSG00000175115	26.103	41.3765	-0.6646	0	0	-	PACS1	phosphofurin acidic cluster sorting protein 1 [Source:HGNC Symbol;Acc:HGNC:30032]	GO:0030137;GO:0000042;GO:0005515;GO:0005794;GO:0005829;GO:0016032;GO:0044325;GO:0050690;GO:0072661	-	KOG3709-PACS-1 cytosolic sorting protein[U]
ENSG00000125995	1543.35	962.769	0.680807	0	0	-	ROMO1	reactive oxygen species modulator 1 [Source:HGNC Symbol;Acc:HGNC:16185]	GO:0005739;GO:0005743;GO:0016021;GO:0016020;GO:0042742;GO:0003674;GO:2000379;GO:0008284;GO:0034614;GO:0001302	-	KOG4096-Uncharacterized conserved protein[S]
ENSG00000026025	112.546	275.262	-1.29029	0	0	down	VIM	vimentin [Source:HGNC Symbol;Acc:HGNC:12692]	GO:0043005;GO:0042995;GO:0031252;GO:0005886;GO:0005882;GO:0005737;GO:0070307;GO:0060395;GO:0060020;GO:0045109;GO:0045103;GO:0014002;GO:0010977;GO:0010628;GO:0005212;GO:0005198;GO:0005515;GO:0005829;GO:0005856;GO:0005925;GO:0005777;GO:0042802;GO:0070062;GO:0031012;GO:0008022;GO:0016032;GO:0005200;GO:0097110;GO:0006928;GO:0030049;GO:0003725;GO:0001948;GO:1990254	K07606-ko05206 MicroRNAs in cancer;ko05169 Epstein-Barr virus infection	-
ENSG00000165458	8.77047	65.8349	-2.90813	0	0	down	INPPL1	inositol polyphosphate phosphatase like 1 [Source:HGNC Symbol;Acc:HGNC:6080]	GO:0005886;GO:0005737;GO:0097178;GO:0044255;GO:0032868;GO:0010629;GO:0009791;GO:0008285;GO:0006661;GO:0006006;GO:0005515;GO:0005829;GO:0003779;GO:0007155;GO:0016787;GO:0005794;GO:0016020;GO:0005856;GO:0002376;GO:0042995;GO:0046856;GO:0006897;GO:0030027;GO:0030175;GO:0042169;GO:0017124;GO:0007015;GO:0043647;GO:0034485;GO:0052659;GO:0001958	K15909-ko00562 Inositol phosphate metabolism;ko04070 Phosphatidylinositol signaling system;ko04662 B cell receptor signaling pathway;ko04666 Fc gamma R-mediated phagocytosis;ko04910 Insulin signaling pathway	KOG0565-Inositol polyphosphate 5-phosphatase and related proteins[U]
ENSG00000138668	11.8899	96.1552	-3.01563	0	0	down	HNRNPD	heterogeneous nuclear ribonucleoprotein D [Source:HGNC Symbol;Acc:HGNC:5036]	GO:0005829;GO:0005634;GO:1990828;GO:1904586;GO:1905663;GO:1904383;GO:1904355;GO:1901355;GO:0071732;GO:0071230;GO:0071392;GO:0061158;GO:0051602;GO:0051592;GO:0048255;GO:0043488;GO:0042493;GO:0032355;GO:0032204;GO:0010629;GO:0021549;GO:0010628;GO:0007420;GO:0001889;GO:0042826;GO:0035925;GO:0008134;GO:0003729;GO:0003682;GO:0003680;GO:0016070;GO:0048511;GO:0005515;GO:0030529;GO:0019013;GO:0006355;GO:…	-	KOG0118-FOG: RRM domain[R]
ENSG00000152818	0.853871	14.2697	-4.06279	0	0	down	UTRN	utrophin [Source:HGNC Symbol;Acc:HGNC:12635]	GO:0045202;GO:0042383;GO:0031594;GO:0030864;GO:0030426;GO:0016010;GO:0014894;GO:0007528;GO:0051015;GO:0005886;GO:0003779;GO:0005654;GO:0046872;GO:0008270;GO:0016020;GO:0005737;GO:0030054;GO:0045211;GO:0005856;GO:0005515;GO:0070062;GO:0043234;GO:0006936;GO:2000649;GO:0001954;GO:0019901;GO:0007517;GO:0005178;GO:0030175;GO:0017166;GO:0031527;GO:0070938	-	KOG4286-Dystrophin-like protein[NTZ]
ENSG00000145734	0.097347	21.4852	-7.78599	0	0	down	BDP1	B double prime 1, subunit of RNA polymerase III transcription initiation factor IIIB [Source:HGNC Symbol;Acc:HGNC:13652]	GO:0006355;GO:0006351;GO:0003677;GO:0005634;GO:0000126;GO:0001026;GO:0001156;GO:0070898;GO:0005654;GO:0006383;GO:0006359	-	KOG2009-Transcription initiation factor TFIIIB, Bdp1 subunit[K]
ENSG00000125656	193.036	61.2106	1.65701	0	0	up	CLPP	caseinolytic mitochondrial matrix peptidase proteolytic subunit [Source:HGNC Symbol;Acc:HGNC:2084]	GO:0005739;GO:0051260;GO:0042802;GO:0004252;GO:0006508;GO:0008233;GO:0016787;GO:0005759;GO:0008236;GO:0005515;GO:0051603;GO:0009368	K01358-ko04112 Cell cycle - Caulobacter;ko04212 Longevity regulating pathway - worm	KOG0840-ATP-dependent Clp protease, proteolytic subunit[O]
ENSG00000175727	1.12846	20.7734	-4.20231	0	0	down	MLXIP	MLX interacting protein [Source:HGNC Symbol;Acc:HGNC:17055]	GO:0005739;GO:0006355;GO:0006351;GO:0003677;GO:0046983;GO:0016020;GO:0005737;GO:0005634;GO:0005741;GO:0003700;GO:0000989;GO:1900402	K09113-ko04932 Non-alcoholic fatty liver disease (NAFLD);ko04931 Insulin resistance	KOG3582-Mlx interactors and related transcription factors[K]
ENSG00000204574	40.7143	134.896	-1.72824	0	0	down	ABCF1	ATP binding cassette subfamily F member 1 [Source:HGNC Symbol;Acc:HGNC:70]	GO:0005840;GO:0005829;GO:0005524;GO:0000166;GO:0016020;GO:0005737;GO:0005634;GO:0003723;GO:0016887;GO:0005654;GO:0005515;GO:0055085;GO:0006954;GO:0008135;GO:0006412;GO:0005635	-	KOG0066-eIF2-interacting protein ABC50 (ABC superfamily)[J]
ENSG00000055044	3.09114	54.6434	-4.14384	0	0	down	NOP58	NOP58 ribonucleoprotein [Source:HGNC Symbol;Acc:HGNC:29926]	GO:0005634;GO:0005515;GO:0001650;GO:0030529;GO:0005829;GO:0016020;GO:0003723;GO:0005654;GO:0006364;GO:0005730;GO:0032040;GO:0042254;GO:0031428;GO:0030515;GO:0000154;GO:0005732;GO:0070761;GO:0016049;GO:0015030;GO:0051117;GO:0001094;GO:0048254	K14565-ko03008 Ribosome biogenesis in eukaryotes	KOG2572-Ribosome biogenesis protein - Nop58p/Nop5p[AJ]
ENSG00000141258	1.64617	40.8766	-4.63409	0	0	down	SGSM2	small G protein signaling modulator 2 [Source:HGNC Symbol;Acc:HGNC:29026]	GO:0042470;GO:0005737;GO:0005096;GO:0006886;GO:0031338;GO:0090630;GO:0012505;GO:0043547;GO:0017137;GO:0034499	-	KOG1648-Uncharacterized conserved protein, contains RUN, BRK and TBC domains[R]
ENSG00000167880	8.28233	36.5144	-2.14036	0	0	down	EVPL	envoplakin [Source:HGNC Symbol;Acc:HGNC:3503]	GO:0005856;GO:0005198;GO:0008544;GO:0019215;GO:0001533;GO:0045111;GO:0005829;GO:0005737;GO:0030054;GO:0031424;GO:0045296;GO:0070062;GO:0030674;GO:0030216;GO:0070268;GO:0030057;GO:0018149	-	-
ENSG00000240972	1408.3	992.664	0.504574	0	0	-	MIF	macrophage migration inhibitory factor (glycosylation-inhibiting factor) [Source:HGNC Symbol;Acc:HGNC:7097]	GO:0043209;GO:0005615;GO:2000343;GO:0090238;GO:0070374;GO:0061081;GO:0061078;GO:0050731;GO:0048146;GO:0043518;GO:0043406;GO:0043066;GO:0042127;GO:0033138;GO:0033033;GO:0032269;GO:0031666;GO:0030330;GO:0007569;GO:0002906;GO:0001934;GO:0050178;GO:0005125;GO:0005576;GO:0005515;GO:0005654;GO:0005829;GO:0016853;GO:0005737;GO:0002376;GO:0006954;GO:0045087;GO:0050900;GO:0050918;GO:0070062;GO:0008283;GO:…	K07253-ko00350 Tyrosine metabolism;ko00360 Phenylalanine metabolism	KOG1759-Macrophage migration inhibitory factor[V]
ENSG00000128595	2.71144	40.5979	-3.90428	0	0	down	CALU	calumenin [Source:HGNC Symbol;Acc:HGNC:1458]	GO:0042470;GO:0005576;GO:0005515;GO:0005794;GO:0005509;GO:0005789;GO:0005783;GO:0046872;GO:0016020;GO:0008150;GO:0044267;GO:0016529;GO:0005788;GO:0033018;GO:0043687	-	KOG4223-Reticulocalbin, calumenin, DNA supercoiling factor, and related Ca2+-binding proteins of the CREC family (EF-Hand protein superfamily)[TU]
ENSG00000009954	6.05738	32.0208	-2.40224	0	0	down	BAZ1B	bromodomain adjacent to zinc finger domain 1B [Source:HGNC Symbol;Acc:HGNC:961]	GO:0005721;GO:0005634;GO:0000793;GO:0048096;GO:0006355;GO:0006338;GO:0006333;GO:0006302;GO:0003007;GO:0071884;GO:0042393;GO:0004715;GO:0016604;GO:0005515;GO:0008270;GO:0018108;GO:0004713;GO:0006351;GO:0016310;GO:0016301;GO:0016740;GO:0005524;GO:0000166;GO:0046872;GO:0006974;GO:2000273;GO:0005654;GO:0003682;GO:0045815;GO:0070577;GO:0043596;GO:0016572;GO:0035173	-	KOG1245-Chromatin remodeling complex WSTF-ISWI, large subunit (contains heterochromatin localization, PHD and BROMO domains)[B]
ENSG00000130811	1991.41	1035.44	0.943542	0	0	-	EIF3G	eukaryotic translation initiation factor 3 subunit G [Source:HGNC Symbol;Acc:HGNC:3274]	GO:0005852;GO:0006413;GO:0003743;GO:0005515;GO:0005829;GO:0006412;GO:0005737;GO:0003723;GO:0003676;GO:0048471;GO:0075525	K03248-ko03013 RNA transport	KOG0122-Translation initiation factor 3, subunit g (eIF-3g)[J]
ENSG00000196535	7.68984	41.8987	-2.44588	0	0	down	MYO18A	myosin XVIIIA [Source:HGNC Symbol;Acc:HGNC:31104]	GO:0005515;GO:0005794;GO:0016459;GO:0006259;GO:0051015;GO:0003677;GO:0005524;GO:0000166;GO:0016020;GO:0005737;GO:0003723;GO:0005856;GO:0000139;GO:0005802;GO:0009986;GO:0043066;GO:0016477;GO:0050714;GO:0007030;GO:0005793;GO:0043030;GO:0043531;GO:0031032;GO:0042641;GO:0048194;GO:0090161;GO:0090164;GO:1903028;GO:0008094;GO:0003774	-	KOG0161-Myosin class II heavy chain[Z]
ENSG00000241978	4.55921	16.5964	-1.86402	0	0	down	AKAP2	A-kinase anchoring protein 2 [Source:HGNC Symbol;Acc:HGNC:372]	-	-	-
ENSG00000142327	17.0608	2.19199	2.96037	0	0	up	RNPEPL1	arginyl aminopeptidase like 1 [Source:HGNC Symbol;Acc:HGNC:10079]	GO:0006508;GO:0070006;GO:0008233;GO:0016787;GO:0046872;GO:0008270;GO:0008237;GO:0004177;GO:0005737;GO:0042277;GO:0043171	-	KOG1047-Bifunctional leukotriene A4 hydrolase/aminopeptidase LTA4H[IOVE]
ENSG00000116062	1.33227	15.4328	-3.53404	0	0	down	MSH6	mutS homolog 6 [Source:HGNC Symbol;Acc:HGNC:7329]	GO:0032301;GO:0000790;GO:0097193;GO:0045910;GO:0045830;GO:0045190;GO:0016447;GO:0016446;GO:0009411;GO:0008630;GO:0008340;GO:0006298;GO:0032137;GO:0003684;GO:0003682;GO:0003677;GO:0005515;GO:0005694;GO:0005654;GO:0005829;GO:0005524;GO:0000166;GO:0043231;GO:0005794;GO:0005634;GO:0030983;GO:0006281;GO:0006974;GO:0016032;GO:0035064;GO:0032405;GO:0016887;GO:0032142;GO:0051096;GO:0000287;GO:0000400;GO:…	K08737-ko03430 Mismatch repair;ko05200 Pathways in cancer;ko05210 Colorectal cancer;ko01524 Platinum drug resistance	KOG0217-Mismatch repair ATPase MSH6 (MutS family)[L]
ENSG00000281181	8025.57	7587.81	0.0809204	0	0	-	FP236383.3	-	-	-	-
ENSG00000122417	15.3731	5.55641	1.46819	0	0	up	ODF2L	outer dense fiber of sperm tails 2 like [Source:HGNC Symbol;Acc:HGNC:29225]	GO:0005813	-	-
ENSG00000258674	22.918	139.454	-2.60524	0	0	down	AC011448.1	-	GO:0016021;GO:0016020	-	-
ENSG00000130816	11.79	47.197	-2.00114	0	0	down	DNMT1	DNA methyltransferase 1 [Source:HGNC Symbol;Acc:HGNC:2976]	GO:0005515;GO:0016569;GO:0006355;GO:0006351;GO:0003677;GO:0032259;GO:0016740;GO:0008168;GO:0046872;GO:0008270;GO:0005634;GO:0003682;GO:0007265;GO:0010628;GO:0005654;GO:0000122;GO:0045814;GO:1990841;GO:0006306;GO:0051571;GO:0003886;GO:0009008;GO:0010216;GO:0051573;GO:0090116;GO:0090309;GO:0005721;GO:0005657;GO:0000792;GO:0071230;GO:0045892;GO:0043045;GO:0042127;GO:0032776;GO:0016458;GO:0010468;GO:…	K00558-ko00270 Cysteine and methionine metabolism;ko05206 MicroRNAs in cancer	-
ENSG00000152082	1486.15	1131.21	0.39371	0	0	-	MZT2B	mitotic spindle organizing protein 2B [Source:HGNC Symbol;Acc:HGNC:25886]	GO:0005813;GO:0005654;GO:0005829;GO:0005815;GO:0005515;GO:0005737;GO:0005856;GO:0005819;GO:0008274	-	-
ENSG00000171159	298.175	96.6263	1.62567	0	0	up	C9orf16	chromosome 9 open reading frame 16 [Source:HGNC Symbol;Acc:HGNC:17823]	GO:0005515;GO:0003674;GO:0008150;GO:0005575	-	-
ENSG00000123200	0.285976	12.1176	-5.40507	0	0	down	ZC3H13	zinc finger CCCH-type containing 13 [Source:HGNC Symbol;Acc:HGNC:20368]	GO:0005515;GO:0046872;GO:0016607;GO:0005634;GO:0003723;GO:0005654	-	KOG1874-KEKE-like motif-containing transcription regulator (Rlr1)/suppressor of sin4[K]
ENSG00000210195	169.858	1723.59	-3.34302	0	0	down	MT-TT	mitochondrially encoded tRNA threonine [Source:HGNC Symbol;Acc:HGNC:7499]	-	-	-
ENSG00000179242	1.3916	13.9839	-3.32895	0	0	down	CDH4	cadherin 4 [Source:HGNC Symbol;Acc:HGNC:1763]	GO:0005887;GO:0045773;GO:0007411;GO:0007157;GO:0007156;GO:0005886;GO:0007155;GO:0005509;GO:0046872;GO:0016020;GO:0016021;GO:0034332	K06797-ko04514 Cell adhesion molecules (CAMs)	KOG3594-FOG: Cadherin repeats[S]
ENSG00000109536	7.14532	96.1896	-3.75081	0	0	down	FRG1	FSHD region gene 1 [Source:HGNC Symbol;Acc:HGNC:3954]	GO:0005681;GO:0005515;GO:0003779;GO:0005737;GO:0005634;GO:0008380;GO:0006397;GO:0003723;GO:0006364;GO:0005730;GO:0051015;GO:0042254;GO:0007517;GO:0000398;GO:0030018;GO:0015030;GO:0071013;GO:0055120	-	KOG3962-Predicted actin-bundling protein[Z]
ENSG00000065150	9.97529	45.2493	-2.18147	0	0	down	IPO5	importin 5 [Source:HGNC Symbol;Acc:HGNC:6402]	GO:0005622;GO:0006886;GO:0008536;GO:0005737;GO:0005634;GO:0071230;GO:0042307;GO:0006607;GO:0008565;GO:0005515;GO:0015031;GO:0016020;GO:0006810;GO:0003723;GO:0005730;GO:0008139;GO:0016032;GO:0005095;GO:0000060;GO:0006610;GO:0034260;GO:0005643;GO:0031965;GO:0034399	-	KOG2171-Karyopherin (importin) beta 3[YU]
ENSG00000112159	0.288164	5.77823	-4.32567	0	0	down	MDN1	midasin AAA ATPase 1 [Source:HGNC Symbol;Acc:HGNC:18302]	GO:0005515;GO:0045111;GO:0005829;GO:0005730;GO:0005634;GO:0005524;GO:0000166;GO:0016020;GO:0016887;GO:0000027;GO:0030687;GO:0051082;GO:0006461;GO:0006364	K14572-ko03008 Ribosome biogenesis in eukaryotes	KOG1808-AAA ATPase containing von Willebrand factor type A (vWA) domain[R]
ENSG00000182899	1323.83	903.484	0.551142	0	0	-	RPL35A	ribosomal protein L35a [Source:HGNC Symbol;Acc:HGNC:10345]	GO:0005739;GO:0005840;GO:0006412;GO:0003735;GO:0005622;GO:0030529;GO:0016020;GO:0003723;GO:0006364;GO:0005829;GO:0070062;GO:0000049;GO:0031012;GO:0042273;GO:0005515;GO:0006413;GO:0000184;GO:0019083;GO:0006614;GO:0022625	K02917-ko03010 Ribosome	KOG0887-60S ribosomal protein L35A/L37[J]
ENSG00000171222	1200.22	863.575	0.474907	0	0	-	SCAND1	SCAN domain containing 1 [Source:HGNC Symbol;Acc:HGNC:10566]	GO:0005515;GO:0003700;GO:0006355;GO:0005634;GO:0042802;GO:0003713	-	KOG1721-FOG: Zn-finger[R]
ENSG00000136279	12.1837	24.5447	-1.01045	0	0	down	DBNL	drebrin like [Source:HGNC Symbol;Acc:HGNC:2696]	GO:0005515;GO:0005886;GO:0005829;GO:0003779;GO:0005622;GO:0005794;GO:0051015;GO:0016020;GO:0005737;GO:0006810;GO:0000139;GO:0030054;GO:0045202;GO:0005856;GO:0031410;GO:0002376;GO:0042995;GO:0002250;GO:0005576;GO:0097178;GO:0006898;GO:0007416;GO:0005768;GO:0045296;GO:0006897;GO:0048812;GO:0030027;GO:0070062;GO:0071800;GO:0002102;GO:0005938;GO:0001726;GO:0005769;GO:0043312;GO:0030665;GO:0034774;GO:…	-	KOG3655-Drebrins and related actin binding proteins[Z]
ENSG00000137776	0.506121	26.742	-5.72348	0	0	down	SLTM	SAFB like transcription modulator [Source:HGNC Symbol;Acc:HGNC:20709]	GO:0016604;GO:0006355;GO:0006351;GO:0005654;GO:0005634;GO:0003723;GO:0003676;GO:0006915;GO:0003690;GO:0006357;GO:0043565;GO:0050684	-	KOG4661-Hsp27-ERE-TATA-binding protein/Scaffold attachment factor (SAF-B)[K]
ENSG00000083896	0.485978	20.144	-5.37331	0	0	down	YTHDC1	YTH domain containing 1 [Source:HGNC Symbol;Acc:HGNC:30626]	GO:0005515;GO:0005886;GO:0005654;GO:0016607;GO:0005634;GO:0008380;GO:0006397;GO:0003723;GO:0006376;GO:0048024;GO:1990247;GO:0016604;GO:0000398	-	KOG1902-Putative signal transduction protein involved in RNA splicing[TA]
ENSG00000169609	4.36198	44.0667	-3.33663	0	0	down	C15orf40	chromosome 15 open reading frame 40 [Source:HGNC Symbol;Acc:HGNC:28443]	-	-	-
ENSG00000100644	14.0081	59.6491	-2.09024	0	0	down	HIF1A	hypoxia inducible factor 1 alpha subunit [Source:HGNC Symbol;Acc:HGNC:4910]	GO:0010628;GO:0002039;GO:0019904;GO:0043234;GO:0016604;GO:0005515;GO:0005829;GO:1904115;GO:0003700;GO:0006355;GO:0006351;GO:0003677;GO:0046983;GO:0005654;GO:0016607;GO:0005737;GO:0005634;GO:0045893;GO:0045944;GO:0016567;GO:0006366;GO:0016579;GO:0061418;GO:0001666;GO:0031625;GO:0046982;GO:0001938;GO:0019899;GO:0032722;GO:0051879;GO:0005667;GO:0090575;GO:0003705;GO:0045766;GO:0019901;GO:0051000;GO:…	K08268-ko04066 HIF-1 signaling pathway;ko04919 Thyroid hormone signaling pathway;ko04212 Longevity regulating pathway - worm;ko05200 Pathways in cancer;ko05230 Central carbon metabolism in cancer;ko05231 Choline metabolism in cancer;ko05205 Proteoglycans in cancer;ko05211 Renal cell carcinoma	KOG3558-Hypoxia-inducible factor 1/Neuronal PAS domain protein NPAS1[TK]
ENSG00000167962	2.16423	36.0549	-4.05827	0	0	down	ZNF598	zinc finger protein 598 [Source:HGNC Symbol;Acc:HGNC:28079]	GO:0003676	-	-
ENSG00000125912	9.8184	45.8287	-2.22269	0	0	down	NCLN	nicalin [Source:HGNC Symbol;Acc:HGNC:26923]	GO:0016021;GO:0016020;GO:0005789;GO:0005783;GO:0009966;GO:0005515;GO:0043254;GO:0031648	-	KOG2526-Predicted aminopeptidases - M20/M25/M40 family[E]
ENSG00000187713	52.9274	3.836	3.78634	0	0	up	TMEM203	transmembrane protein 203 [Source:HGNC Symbol;Acc:HGNC:28217]	GO:0007283;GO:0006874;GO:0005789;GO:0005783;GO:0016021;GO:0016020;GO:0005515	-	-
ENSG00000145425	549.238	936.406	-0.769704	0	0	-	RPS3A	ribosomal protein S3A [Source:HGNC Symbol;Acc:HGNC:10421]	GO:0005829;GO:0005634;GO:0048027;GO:0005515;GO:0005840;GO:0006412;GO:0003735;GO:0005622;GO:0030529;GO:0005730;GO:0005783;GO:0006413;GO:0005737;GO:0003723;GO:0022627;GO:0030154;GO:0005925;GO:0070062;GO:0005654;GO:0031012;GO:0043066;GO:0006364;GO:0000184;GO:0019083;GO:0006614	K02984-ko03010 Ribosome	KOG1628-40S ribosomal protein S3A[J]
ENSG00000070961	1.17651	14.4329	-3.61678	0	0	down	ATP2B1	ATPase plasma membrane Ca2+ transporting 1 [Source:HGNC Symbol;Acc:HGNC:814]	GO:0005886;GO:1990034;GO:0051480;GO:0015085;GO:0005515;GO:0006811;GO:0046872;GO:0016787;GO:0005634;GO:0005524;GO:0000166;GO:0016020;GO:0016021;GO:0006810;GO:0005388;GO:0006816;GO:0070588;GO:0099132;GO:0005516;GO:0070062;GO:0034220;GO:0005887;GO:1903779;GO:0006874;GO:0043231;GO:0030165;GO:0045177;GO:0045121;GO:0032809;GO:0032591;GO:0032590;GO:0016324;GO:0016323;GO:0009898;GO:1901660;GO:0071386;GO:…	K05850-ko04020 Calcium signaling pathway;ko04024 cAMP signaling pathway;ko04022 cGMP - PKG signaling pathway;ko04261 Adrenergic signaling in cardiomyocytes;ko04970 Salivary secretion;ko04972 Pancreatic secretion	KOG0204-Calcium transporting ATPase[P]
ENSG00000170606	160.274	81.2291	0.980474	0	0	-	HSPA4	heat shock protein family A (Hsp70) member 4 [Source:HGNC Symbol;Acc:HGNC:5237]	GO:0005515;GO:0005829;GO:0005524;GO:0000166;GO:0005737;GO:0006986;GO:0070062;GO:0045040;GO:0051131	K09489-ko04612 Antigen processing and presentation	KOG0103-Molecular chaperones HSP105/HSP110/SSE1, HSP70 superfamily[O]
ENSG00000112651	316.788	117.064	1.43622	0	0	up	MRPL2	mitochondrial ribosomal protein L2 [Source:HGNC Symbol;Acc:HGNC:14056]	GO:0005840;GO:0006412;GO:0003735;GO:0005622;GO:0005739;GO:0030529;GO:0003723;GO:0032543;GO:0005743;GO:0070125;GO:0070126;GO:0005762	K02886-ko03010 Ribosome	KOG0438-Mitochondrial/chloroplast ribosomal protein L2[J]
ENSG00000135316	0.07362	14.4636	-7.61811	0	0	down	SYNCRIP	synaptotagmin binding cytoplasmic RNA interacting protein [Source:HGNC Symbol;Acc:HGNC:16918]	GO:0005681;GO:0005515;GO:0030529;GO:0043231;GO:0005783;GO:0016020;GO:0005737;GO:0005634;GO:0008380;GO:0006397;GO:0003723;GO:0003676;GO:0005654;GO:0006417;GO:0071346;GO:0017148;GO:0016032;GO:0000398;GO:0006396;GO:0071013;GO:0001649;GO:0070934;GO:0070937;GO:0071204;GO:0097452;GO:0008143;GO:0019013	-	KOG0117-Heterogeneous nuclear ribonucleoprotein R (RRM superfamily)[A]
ENSG00000125148	3877.12	3379.37	0.198232	0	0	-	MT2A	metallothionein 2A [Source:HGNC Symbol;Acc:HGNC:7406]	GO:0048143;GO:0010273;GO:0007263;GO:0006882;GO:0046870;GO:0008270;GO:0005515;GO:0046872;GO:0005737;GO:0005634;GO:0048471;GO:0005829;GO:0006878;GO:0008144;GO:0035690;GO:0060333;GO:0045926;GO:0010038;GO:0036016;GO:0036018;GO:0071294	K14739-ko04978 Mineral absorption;ko04212 Longevity regulating pathway - worm	-
ENSG00000042753	2894.59	1973.58	0.552548	0	0	-	AP2S1	adaptor related protein complex 2 sigma 1 subunit [Source:HGNC Symbol;Acc:HGNC:565]	GO:0030117;GO:0016192;GO:0015031;GO:0006886;GO:0006810;GO:0008565;GO:0030122;GO:0032802;GO:0034383;GO:0005515;GO:0005886;GO:0016020;GO:0005905;GO:0005829;GO:0006897;GO:0061024;GO:0060071;GO:0007018;GO:0019886;GO:0005215;GO:0048268;GO:0048013;GO:0030666;GO:0036020;GO:0050690;GO:0030669;GO:0035615;GO:0072583;GO:0030100	K11827-ko04144 Endocytosis;ko04961 Endocrine and other factor-regulated calcium reabsorption;ko04721 Synaptic vesicle cycle;ko05016 Huntington's disease	KOG0935-Clathrin adaptor complex, small subunit[U]
ENSG00000122565	4.05102	46.1732	-3.5107	0	0	down	CBX3	chromobox 3 [Source:HGNC Symbol;Acc:HGNC:1553]	GO:0048511;GO:0005515;GO:0016569;GO:0006355;GO:0006351;GO:0005634;GO:0005819;GO:0042802;GO:0005637;GO:0000784;GO:0019899;GO:0019904;GO:0045892;GO:0000785;GO:0006338;GO:0005635;GO:0005719;GO:0005720;GO:1990226;GO:0000779;GO:0000775;GO:0031618	-	KOG1911-Heterochromatin-associated protein HP1 and related CHROMO domain proteins[B]
ENSG00000134954	3.13622	33.9295	-3.43544	0	0	down	ETS1	ETS proto-oncogene 1, transcription factor [Source:HGNC Symbol;Acc:HGNC:3488]	GO:0005667;GO:0005634;GO:0070555;GO:0070301;GO:0060055;GO:0050728;GO:0045944;GO:0045766;GO:0044849;GO:0034616;GO:0032355;GO:0030335;GO:0021983;GO:0021854;GO:0010715;GO:0009612;GO:0009611;GO:0008284;GO:0007565;GO:0006357;GO:0001666;GO:1990837;GO:0043565;GO:0035035;GO:0003700;GO:0003677;GO:0005515;GO:0006355;GO:0006351;GO:0005654;GO:0005737;GO:0002376;GO:0042802;GO:0000978;GO:0006955;GO:0050729;GO:…	K02678-ko04014 Ras signaling pathway;ko04013 MAPK signaling pathway - fly;ko04320 Dorso-ventral axis formation;ko05166 HTLV-I infection	KOG3806-Predicted transcription factor[K]
ENSG00000169692	54.3368	4.21811	3.68726	0	0	up	AGPAT2	1-acylglycerol-3-phosphate O-acyltransferase 2 [Source:HGNC Symbol;Acc:HGNC:325]	GO:0008654;GO:0008152;GO:0006629;GO:0016746;GO:0005789;GO:0005783;GO:0016740;GO:0016020;GO:0016021;GO:0003841;GO:0016024;GO:0005886;GO:0043312;GO:0035579;GO:0006654;GO:0001819;GO:0001961;GO:0006644;GO:0008544;GO:0042493	K13509-ko00561 Glycerolipid metabolism;ko00564 Glycerophospholipid metabolism;ko04072 Phospholipase D signaling pathway;ko04975 Fat digestion and absorption	KOG2848-1-acyl-sn-glycerol-3-phosphate acyltransferase[I]
ENSG00000119917	2.49101	37.1919	-3.90018	0	0	down	IFIT3	interferon induced protein with tetratricopeptide repeats 3 [Source:HGNC Symbol;Acc:HGNC:5411]	GO:0005515;GO:0005739;GO:0005829;GO:0005737;GO:0002376;GO:0045087;GO:0042802;GO:0051607;GO:0035457;GO:0003674;GO:0009615;GO:0008285;GO:0043066;GO:0060337	-	KOG1124-FOG: TPR repeat[R]
ENSG00000124767	16.9181	80.7775	-2.25539	0	0	down	GLO1	glyoxalase I [Source:HGNC Symbol;Acc:HGNC:4323]	GO:0030316;GO:0009438;GO:0006749;GO:0006357;GO:0005975;GO:0008270;GO:0004462;GO:0005886;GO:0016829;GO:0046872;GO:0005829;GO:0005634;GO:0005737;GO:0070062;GO:0043066;GO:0006090	K01759-ko00620 Pyruvate metabolism	-
ENSG00000109971	132.458	278.843	-1.07392	0	0	down	HSPA8	heat shock protein family A (Hsp70) member 8 [Source:HGNC Symbol;Acc:HGNC:5241]	GO:0042623;GO:0042470;GO:0005681;GO:0005515;GO:0005886;GO:0005829;GO:0030529;GO:0006355;GO:0006351;GO:0005524;GO:0000166;GO:0016020;GO:0005737;GO:0005634;GO:0008380;GO:0006397;GO:0003723;GO:0045202;GO:0005615;GO:0098793;GO:0005925;GO:0005576;GO:0005730;GO:0006986;GO:0045296;GO:0070062;GO:0005622;GO:0061024;GO:0072562;GO:0043488;GO:0005654;GO:0031012;GO:0006457;GO:0043312;GO:0016032;GO:0016887;GO:…	K03283-ko03040 Spliceosome;ko04141 Protein processing in endoplasmic reticulum;ko04010 MAPK signaling pathway;ko04144 Endocytosis;ko04612 Antigen processing and presentation;ko04915 Estrogen signaling pathway;ko04213 Longevity regulating pathway - multiple species;ko05134 Legionellosis;ko05162 Measles;ko05164 Influenza A;ko05169 Epstein-Barr virus infection;ko05145 Toxoplasmosis	KOG0101-Molecular chaperones HSP70/HSC70, HSP70 superfamily[O]
ENSG00000038219	0.878533	10.3795	-3.5625	0	0	down	BOD1L1	biorientation of chromosomes in cell division 1 like 1 [Source:HGNC Symbol;Acc:HGNC:31792]	GO:0005694;GO:0005654;GO:0006281;GO:0006974;GO:0031297	-	-
ENSG00000171552	432.419	321.417	0.427982	0	0	-	BCL2L1	BCL2 like 1 [Source:HGNC Symbol;Acc:HGNC:992]	GO:0005515;GO:0005739;GO:0005829;GO:0042981;GO:0005743;GO:0016020;GO:0016021;GO:0005737;GO:0005634;GO:0006915;GO:0030054;GO:0045202;GO:0005741;GO:0005856;GO:0005759;GO:0031410;GO:0005813;GO:0005815;GO:0042802;GO:0006897;GO:0043066;GO:0031965;GO:0030672;GO:0000910;GO:0019901;GO:2001240;GO:1902042;GO:0007093;GO:2001244;GO:1902230;GO:0090201;GO:0001836;GO:0051434;GO:0034097;GO:0046902;GO:0051881;GO:…	K04570-ko04014 Ras signaling pathway;ko04630 Jak-STAT signaling pathway;ko04064 NF-kappa B signaling pathway;ko04151 PI3K-Akt signaling pathway;ko04210 Apoptosis;ko04215 Apoptosis - multiple species;ko05200 Pathways in cancer;ko05202 Transcriptional misregulation in cancers;ko05212 Pancreatic cancer;ko05220 Chronic myeloid leukemia;ko05222 Small cell lung cancer;ko05014 Amyotrophic lateral sclero…	KOG4728-Anti-apoptotic Bcl-2 family proteins, prevent opening of mitochondrial porin channel[T]
ENSG00000092841	2001.25	1466.62	0.448413	0	0	-	MYL6	myosin light chain 6 [Source:HGNC Symbol;Acc:HGNC:7587]	GO:0016461;GO:0005515;GO:0016459;GO:0005509;GO:0016020;GO:0005829;GO:0070062;GO:0031012;GO:0005903;GO:0031982;GO:0006936;GO:0007519;GO:0030898;GO:0030049;GO:0003774;GO:0008307	K12751-ko04921 Oxytocin signaling pathway;ko04270 Vascular smooth muscle contraction	KOG0030-Myosin essential light chain, EF-Hand protein superfamily[Z]
ENSG00000137133	203.429	64.503	1.65709	0	0	up	HINT2	histidine triad nucleotide binding protein 2 [Source:HGNC Symbol;Acc:HGNC:18344]	GO:0005739;GO:2000757;GO:0044240;GO:0006629;GO:0003824;GO:0016787;GO:0005730;GO:0000166;GO:0006915;GO:0006694	-	KOG3275-Zinc-binding protein of the histidine triad (HIT) family[T]
ENSG00000100280	2.15776	23.9278	-3.47108	0	0	down	AP1B1	adaptor related protein complex 1 beta 1 subunit [Source:HGNC Symbol;Acc:HGNC:554]	GO:0005515;GO:0030131;GO:0005794;GO:0005829;GO:0043231;GO:0030117;GO:0016192;GO:0015031;GO:0006886;GO:0008565;GO:0016020;GO:0006810;GO:0031410;GO:0019886;GO:0005215;GO:0032588;GO:0030665;GO:0000139;GO:0005765;GO:0050690;GO:0030659;GO:0030669;GO:0019901;GO:0007507;GO:0007368	-	-
ENSG00000074071	377.388	199.002	0.923263	0	0	-	MRPS34	mitochondrial ribosomal protein S34 [Source:HGNC Symbol;Acc:HGNC:16618]	GO:0005739;GO:0032543;GO:0003735;GO:0005840;GO:0030529;GO:0005743;GO:0070125;GO:0070126	-	-
ENSG00000135677	3.59109	25.1945	-2.81061	0	0	down	GNS	glucosamine (N-acetyl)-6-sulfatase [Source:HGNC Symbol;Acc:HGNC:4422]	GO:0005764;GO:0008152;GO:0003824;GO:0016787;GO:0046872;GO:0008484;GO:0008449;GO:0030203;GO:0005515;GO:0005576;GO:0070062;GO:0043312;GO:1904813;GO:0043202;GO:0035578;GO:0042340;GO:0006027	K01137-ko00531 Glycosaminoglycan degradation;ko04142 Lysosome	KOG3731-Sulfatases[G]
ENSG00000163811	3.11257	30.0101	-3.26927	0	0	down	WDR43	WD repeat domain 43 [Source:HGNC Symbol;Acc:HGNC:28945]	GO:0005515;GO:0006355;GO:0006351;GO:0005634;GO:0003723;GO:0006364;GO:0005730;GO:0042254;GO:0005654;GO:0045943;GO:0001650;GO:2000234	K14546-ko03008 Ribosome biogenesis in eukaryotes	KOG4547-WD40 repeat-containing protein[R]
ENSG00000132475	29.6697	93.7977	-1.66056	0	0	down	H3F3B	H3 histone family member 3B [Source:HGNC Symbol;Acc:HGNC:4765]	GO:0060964;GO:0009725;GO:0007420;GO:0005515;GO:0005694;GO:0000786;GO:0006334;GO:0046982;GO:0003677;GO:0005634;GO:0005576;GO:0070062;GO:0044267;GO:0005654;GO:0000784;GO:0045815;GO:0042393;GO:0043234;GO:0030307;GO:0006336;GO:0007596;GO:0000228;GO:0000183;GO:0045814;GO:0000979;GO:0031492;GO:0000980;GO:0000788;GO:0032200	K11253-ko05202 Transcriptional misregulation in cancers;ko05322 Systemic lupus erythematosus;ko05034 Alcoholism	KOG1745-Histones H3 and H4[B]
ENSG00000196154	1551.16	1033.19	0.586239	0	0	-	S100A4	S100 calcium binding protein A4 [Source:HGNC Symbol;Acc:HGNC:10494]	GO:0005515;GO:0005509;GO:0046872;GO:0005634;GO:0003723;GO:0048471;GO:0005615;GO:0046914;GO:0070062;GO:0043123;GO:0050786;GO:0001837;GO:0043005;GO:0048306;GO:0042802;GO:0003779	-	-
ENSG00000197102	28.8825	59.2195	-1.03588	0	0	down	DYNC1H1	dynein cytoplasmic 1 heavy chain 1 [Source:HGNC Symbol;Acc:HGNC:2961]	GO:0030175;GO:0005737;GO:0034063;GO:0033962;GO:0051959;GO:0005515;GO:0003777;GO:0005524;GO:0000166;GO:0016020;GO:0006810;GO:0003723;GO:0005856;GO:0005874;GO:0003774;GO:0007018;GO:0016887;GO:0005813;GO:0030286;GO:0005576;GO:0005829;GO:0070062;GO:0000086;GO:0097711;GO:0031012;GO:0043312;GO:0007052;GO:0019886;GO:0006888;GO:0035578;GO:0005868;GO:0060236;GO:0008569;GO:0051293	K10413-ko04145 Phagosome;ko04962 Vasopressin-regulated water reabsorption;ko05132 Salmonella infection	KOG3595-Dyneins, heavy chain[Z]
ENSG00000119326	1.808	33.8717	-4.22762	0	0	down	CTNNAL1	catenin alpha like 1 [Source:HGNC Symbol;Acc:HGNC:2512]	GO:0005515;GO:0005886;GO:0007155;GO:0051015;GO:0016020;GO:0005737;GO:0005856;GO:0045296;GO:0007266;GO:0005829;GO:0005622	-	KOG3681-Alpha-catenin[W]
ENSG00000152795	1.79658	26.2389	-3.86838	0	0	down	HNRNPDL	heterogeneous nuclear ribonucleoprotein D like [Source:HGNC Symbol;Acc:HGNC:5037]	GO:0030529;GO:0019013;GO:0005654;GO:0003676;GO:0005515;GO:0006355;GO:0006351;GO:0003677;GO:0005737;GO:0005634;GO:0003723;GO:0070062	-	-
ENSG00000167468	1530.99	1144.63	0.419579	0	0	-	GPX4	glutathione peroxidase 4 [Source:HGNC Symbol;Acc:HGNC:4556]	GO:0051258;GO:0004602;GO:0042802;GO:0043234;GO:0005739;GO:0055114;GO:0016491;GO:0005654;GO:0005737;GO:0005634;GO:0007275;GO:0098869;GO:0004601;GO:0006979;GO:0005829;GO:0070062;GO:0006644;GO:0019372;GO:0047066	-	-
ENSG00000147383	40.3504	0.121692	8.37321	0	0	up	NSDHL	NAD(P) dependent steroid dehydrogenase-like [Source:HGNC Symbol;Acc:HGNC:13398]	GO:0060716;GO:0008203;GO:0007224;GO:0001942;GO:0005811;GO:0006694;GO:0016616;GO:0003854;GO:0006629;GO:0005789;GO:0005783;GO:0055114;GO:0016491;GO:0016021;GO:0016020;GO:0008202;GO:0006695;GO:0016126;GO:0000252;GO:0047012	K07748-ko00100 Steroid biosynthesis	KOG1430-C-3 sterol dehydrogenase/3-beta-hydroxysteroid dehydrogenase and related dehydrogenases[IE]
ENSG00000184007	8.73559	42.0405	-2.2668	0	0	down	PTP4A2	protein tyrosine phosphatase type IVA, member 2 [Source:HGNC Symbol;Acc:HGNC:9635]	GO:0004721;GO:0005886;GO:0035335;GO:0016311;GO:0016791;GO:0006470;GO:0004725;GO:0016787;GO:0016020;GO:0005737;GO:0005634;GO:0005768;GO:0005829;GO:0070062;GO:0005769;GO:0043687;GO:0004727	-	KOG2836-Protein tyrosine phosphatase IVA1[T]
ENSG00000171130	40.8025	0.604411	6.07698	0	0	up	ATP6V0E2	ATPase H+ transporting V0 subunit e2 [Source:HGNC Symbol;Acc:HGNC:21723]	GO:0016021;GO:0016020;GO:0015078;GO:0015991;GO:0033179;GO:0006811;GO:0016787;GO:0006810;GO:0015992;GO:0034220;GO:0010008;GO:0030670;GO:0042625;GO:0007035;GO:0008286;GO:0016049;GO:0016241;GO:0033572;GO:0090383;GO:0046961	K02153-ko00190 Oxidative phosphorylation;ko04145 Phagosome;ko04966 Collecting duct acid secretion;ko04721 Synaptic vesicle cycle;ko05323 Rheumatoid arthritis;ko05110 Vibrio cholerae infection;ko05120 Epithelial cell signaling in Helicobacter pylori infection	-
ENSG00000185453	1.70484	24.5101	-3.84566	0	0	down	C19orf68	chromosome 19 open reading frame 68 [Source:HGNC Symbol;Acc:HGNC:34495]	GO:0005515;GO:0007275;GO:0005634;GO:0006511;GO:0008270	-	-
ENSG00000210174	23.2383	1157.97	-5.63895	0	0	down	MT-TR	mitochondrially encoded tRNA arginine [Source:HGNC Symbol;Acc:HGNC:7496]	-	-	-
ENSG00000131051	10.6864	56.0167	-2.39008	0	0	down	RBM39	RNA binding motif protein 39 [Source:HGNC Symbol;Acc:HGNC:15923]	GO:0006397;GO:0005515;GO:0015630;GO:0006355;GO:0006351;GO:0005654;GO:0016607;GO:0005634;GO:0008380;GO:0003723;GO:0003676;GO:0005815;GO:0006396	-	KOG0147-Transcriptional coactivator CAPER (RRM superfamily)[K]
ENSG00000175602	1172.34	952.98	0.298868	0	0	-	CCDC85B	coiled-coil domain containing 85B [Source:HGNC Symbol;Acc:HGNC:24926]	GO:0005634;GO:0045892;GO:0045599;GO:0005515;GO:0006355;GO:0006351;GO:0005737;GO:0030154;GO:0005856;GO:0005813;GO:0005815;GO:0040008;GO:0030308	-	KOG3819-Uncharacterized conserved proteins (Hepatitis delta antigen-interacting protein A)[S]
ENSG00000175216	4.89195	23.7443	-2.2791	0	0	down	CKAP5	cytoskeleton associated protein 5 [Source:HGNC Symbol;Acc:HGNC:28959]	GO:0007098;GO:0005515;GO:0005694;GO:0051301;GO:0016020;GO:0005737;GO:0007049;GO:0005856;GO:0000922;GO:0005813;GO:0005815;GO:0005819;GO:0000775;GO:0000776;GO:0000777;GO:0005829;GO:0045296;GO:0000086;GO:0097711;GO:0043234;GO:0007062;GO:0007051;GO:0000930;GO:0050658;GO:0035371;GO:0015630;GO:0051010;GO:0030951;GO:0046785;GO:0051298	-	KOG1820-Microtubule-associated protein[Z]
ENSG00000072274	5.92508	28.1058	-2.24596	0	0	down	TFRC	transferrin receptor [Source:HGNC Symbol;Acc:HGNC:11763]	GO:0005886;GO:0006879;GO:0006898;GO:0004998;GO:0033572;GO:1990712;GO:0070062;GO:0055037;GO:0048471;GO:0016020;GO:0010008;GO:0009986;GO:0009897;GO:0005905;GO:0005768;GO:0045780;GO:0030316;GO:0001948;GO:0042470;GO:0005576;GO:0005515;GO:0016021;GO:0003723;GO:0005615;GO:0042802;GO:0030890;GO:0046718;GO:0006897;GO:0061024;GO:0072562;GO:0042102;GO:0005887;GO:0016032;GO:0042803;GO:1903561;GO:0031410;GO:…	K06503-ko04066 HIF-1 signaling pathway;ko04144 Endocytosis;ko04145 Phagosome;ko04640 Hematopoietic cell lineage	KOG2195-Transferrin receptor and related proteins containing the protease-associated (PA) domain[OPR]
ENSG00000127922	36.4832	139.789	-1.93794	0	0	down	SEM1	SEM1, 26S proteasome complex subunit [Source:HGNC Symbol;Acc:HGNC:10845]	GO:0006406;GO:0043248;GO:0008541;GO:0000502;GO:0005515;GO:0038095;GO:0005829;GO:0000165;GO:0000209;GO:0002223;GO:0002479;GO:0006521;GO:0010972;GO:0016579;GO:0031145;GO:0031146;GO:0033209;GO:0038061;GO:0043161;GO:0043488;GO:0050852;GO:0051437;GO:0055085;GO:0060071;GO:0061418;GO:0090090;GO:0090263;GO:0005654;GO:0051436;GO:0043687;GO:0000724;GO:0032039	K10881-ko03050 Proteasome;ko03440 Homologous recombination;ko05169 Epstein-Barr virus infection	KOG4764-Uncharacterized conserved protein[S]
ENSG00000204628	2162.47	2598.34	-0.26491	0	0	-	RACK1	receptor for activated C kinase 1 [Source:HGNC Symbol;Acc:HGNC:4399]	GO:0005654;GO:0005829;GO:0065009;GO:0072344;GO:0044297;GO:0043025;GO:0043005;GO:0030425;GO:0016020;GO:0015935;GO:0005737;GO:1903208;GO:0090003;GO:0043473;GO:0017148;GO:0006412;GO:0001649;GO:0008200;GO:0005080;GO:0048511;GO:0005515;GO:0005886;GO:0005739;GO:0005840;GO:0030529;GO:0016567;GO:0005634;GO:0003723;GO:0006915;GO:0007275;GO:0007049;GO:0048471;GO:0043022;GO:0042995;GO:0030496;GO:0043547;GO:…	K14753-ko05162 Measles	KOG0279-G protein beta subunit-like protein[T]
ENSG00000116754	4.61873	44.5546	-3.27001	0	0	down	SRSF11	serine and arginine rich splicing factor 11 [Source:HGNC Symbol;Acc:HGNC:10782]	GO:0016607;GO:0008380;GO:0003676;GO:0005515;GO:0005634;GO:0006397;GO:0003723;GO:0005654;GO:0006369;GO:0006405;GO:0031124;GO:0000398;GO:0006406	-	KOG4676-Splicing factor, arginine/serine-rich[A]
ENSG00000174886	1175.34	800.871	0.553439	4.71061e-308	2.18639e-306	-	NDUFA11	NADH:ubiquinone oxidoreductase subunit A11 [Source:HGNC Symbol;Acc:HGNC:20371]	GO:0005739;GO:0005743;GO:0055114;GO:0016021;GO:0016020;GO:0070469;GO:0006120;GO:0032981;GO:0005747	K03956-ko00190 Oxidative phosphorylation;ko05010 Alzheimer's disease;ko05012 Parkinson's disease;ko05016 Huntington's disease;ko04932 Non-alcoholic fatty liver disease (NAFLD)	-
ENSG00000189171	1328.79	888.37	0.580876	8.91306e-308	4.12568e-306	-	S100A13	S100 calcium binding protein A13 [Source:HGNC Symbol;Acc:HGNC:10490]	GO:0005576;GO:0005515;GO:0042803;GO:0008270;GO:0005829;GO:0005886;GO:0005509;GO:0005730;GO:0005634;GO:0046872;GO:0015031;GO:0005737;GO:0006810;GO:0048471;GO:0005615;GO:0005507;GO:0042629;GO:0008289;GO:0070062;GO:0043123;GO:0050663;GO:0043303;GO:0050786;GO:0017134;GO:0050703;GO:0051602;GO:0046688;GO:0008360;GO:0008284	-	-
ENSG00000214063	32.2188	126.507	-1.97324	1.33474e-306	6.1615e-305	down	TSPAN4	tetraspanin 4 [Source:HGNC Symbol;Acc:HGNC:11859]	GO:0005515;GO:0005886;GO:0016021;GO:0016020;GO:0005925;GO:0003823;GO:0005887;GO:0007166;GO:0031982;GO:0005178;GO:0006461	-	KOG3882-Tetraspanin family integral membrane protein[R]
ENSG00000157227	32.3969	79.6038	-1.29698	7.97012e-306	3.66927e-304	down	MMP14	matrix metallopeptidase 14 [Source:HGNC Symbol;Acc:HGNC:7160]	GO:0005737;GO:1990834;GO:1905523;GO:0097094;GO:0060348;GO:0051895;GO:0048771;GO:0048754;GO:0048701;GO:0045746;GO:0045579;GO:0043627;GO:0043615;GO:0035988;GO:0031638;GO:0030574;GO:0030324;GO:0016477;GO:0014070;GO:0010831;GO:0009725;GO:0009612;GO:0008584;GO:0006979;GO:0001958;GO:0001935;GO:0001666;GO:0001541;GO:0001525;GO:0001503;GO:0016504;GO:0005178;GO:0004222;GO:0005615;GO:0005634;GO:0042470;GO:…	K07763-ko04668 TNF signaling pathway;ko04912 GnRH signaling pathway	KOG1565-Gelatinase A and related matrix metalloproteases[OW]
ENSG00000163866	20.5934	0.101328	7.66701	9.17714e-306	4.21357e-304	up	SMIM12	small integral membrane protein 12 [Source:HGNC Symbol;Acc:HGNC:25154]	GO:0016021;GO:0016020	-	-
ENSG00000078618	7.3283	59.2119	-3.01434	1.2017e-301	5.5026e-300	down	NRDC	nardilysin convertase [Source:HGNC Symbol;Acc:HGNC:7995]	GO:0003824;GO:0046872;GO:0005739;GO:0006508;GO:0008233;GO:0005515;GO:0005829;GO:0016787;GO:0004222;GO:0008237;GO:0008283;GO:0009986;GO:0016477;GO:0048408;GO:0007528;GO:0051044;GO:0052548	-	KOG0959-N-arginine dibasic convertase NRD1 and related Zn2+-dependent endopeptidases, insulinase superfamily[O]
ENSG00000109736	238.028	103.667	1.19917	5.32592e-301	2.43222e-299	up	MFSD10	major facilitator superfamily domain containing 10 [Source:HGNC Symbol;Acc:HGNC:16894]	GO:0055085;GO:0016021;GO:0016020;GO:0006810;GO:0006915;GO:0031526;GO:0008493;GO:0008514;GO:0015904;GO:0043252;GO:0030659	-	KOG2615-Permease of the major facilitator superfamily[R]
ENSG00000054654	0.35224	5.76128	-4.03176	5.32753e-300	2.42645e-298	down	SYNE2	spectrin repeat containing nuclear envelope protein 2 [Source:HGNC Symbol;Acc:HGNC:17084]	GO:0034993;GO:0016235;GO:0005515;GO:0005886;GO:0045111;GO:0005739;GO:0003779;GO:0051015;GO:0031965;GO:0016021;GO:0016020;GO:0005737;GO:0005634;GO:0030054;GO:0005856;GO:0005654;GO:0005925;GO:0090286;GO:0005635;GO:0070062;GO:0016529;GO:0030335;GO:0033017;GO:0030018;GO:0031527;GO:0031258;GO:0051642;GO:0005640;GO:0031981;GO:0007097;GO:0031022;GO:0030016;GO:1902017;GO:0034504;GO:0021817;GO:0010761;GO:…	-	KOG0516-Dystonin, GAS (Growth-arrest-specific protein), and related proteins[Z]
ENSG00000156697	42.7701	7.49	2.51356	1.66909e-299	7.58167e-298	up	UTP14A	UTP14A small subunit processome component [Source:HGNC Symbol;Acc:HGNC:10665]	GO:0005515;GO:0005829;GO:0005730;GO:0005634;GO:0003723;GO:0006364;GO:0032040;GO:0042254;GO:0005654;GO:0030490	K14567-ko03008 Ribosome biogenesis in eukaryotes	KOG2172-Uncharacterized conserved protein[S]
ENSG00000137818	2498.4	2252.45	0.149508	3.39029e-299	1.53591e-297	-	RPLP1	ribosomal protein lateral stalk subunit P1 [Source:HGNC Symbol;Acc:HGNC:10372]	GO:0005515;GO:0005840;GO:0003735;GO:0005622;GO:0030529;GO:0006412;GO:0006414;GO:0005925;GO:0005829;GO:0070062;GO:0032147;GO:0022625;GO:0006413;GO:0006364;GO:0000184;GO:0019083;GO:0006614;GO:0030295;GO:0002181;GO:0045860	K02942-ko03010 Ribosome	KOG1762-60s acidic ribosomal protein P1[J]
ENSG00000118680	28.9876	135.754	-2.22748	2.81716e-298	1.27288e-296	down	MYL12B	myosin light chain 12B [Source:HGNC Symbol;Acc:HGNC:29827]	GO:0005515;GO:0016459;GO:0005509;GO:0046872;GO:0005829;GO:0070062;GO:0006936;GO:0045177;GO:0030018;GO:0016460;GO:0005903;GO:0001725;GO:0008360;GO:0032036	K12757-ko04810 Regulation of actin cytoskeleton;ko04510 Focal adhesion;ko04530 Tight junction;ko04611 Platelet activation;ko04670 Leukocyte transendothelial migration	KOG0031-Myosin regulatory light chain, EF-Hand protein superfamily[Z]
ENSG00000101439	1275.9	952.227	0.422135	5.40143e-298	2.43407e-296	-	CST3	cystatin C [Source:HGNC Symbol;Acc:HGNC:2475]	GO:0048471;GO:0043292;GO:0043025;GO:0031982;GO:0042995;GO:0031965;GO:0030424;GO:0005783;GO:0005764;GO:0005771;GO:0005737;GO:0005615;GO:0005604;GO:0070301;GO:0060548;GO:0060009;GO:0048678;GO:0043067;GO:0045740;GO:0042493;GO:0042747;GO:0034599;GO:0032355;GO:0031667;GO:0014070;GO:0010035;GO:0009743;GO:0009636;GO:0008584;GO:0008284;GO:0007566;GO:0007431;GO:0007420;GO:0006979;GO:0006915;GO:0001775;GO:…	K13899-ko04970 Salivary secretion	-
ENSG00000169905	2.52895	15.344	-2.60107	7.17886e-296	3.22651e-294	down	TOR1AIP2	torsin 1A interacting protein 2 [Source:HGNC Symbol;Acc:HGNC:24055]	GO:0005783;GO:0005789;GO:0016021;GO:0016020;GO:0005634;GO:0031965;GO:0007029;GO:0032781;GO:0001671;GO:0051117;GO:0090435;GO:0005515	-	-
ENSG00000167671	70.8242	34.9157	1.02036	1.21432e-294	5.44337e-293	up	UBXN6	UBX domain protein 6 [Source:HGNC Symbol;Acc:HGNC:14928]	GO:0005515;GO:0005737;GO:0005634;GO:0005856;GO:0005815;GO:0003674;GO:0008150;GO:0070062	K14011-ko04141 Protein processing in endoplasmic reticulum	KOG2699-Predicted ubiquitin regulatory protein[O]
ENSG00000114861	1.5393	24.124	-3.97012	7.39208e-294	3.3049e-292	down	FOXP1	forkhead box P1 [Source:HGNC Symbol;Acc:HGNC:3823]	GO:0043565;GO:0006355;GO:0006351;GO:0003700;GO:0003677;GO:0005654;GO:0046872;GO:0005634;GO:0006357;GO:0005515;GO:0032496;GO:0000981;GO:0042116;GO:0045892;GO:0010595;GO:0042118;GO:0043621;GO:0030316;GO:0048661;GO:0035019;GO:0050681;GO:0050727;GO:0060766;GO:0032680;GO:1901509;GO:0036035;GO:0042117;GO:0061470;GO:0002903;GO:0035926;GO:0045655;GO:0050706;GO:0072619;GO:1900424;GO:1901256;GO:2001182;GO:…	-	KOG4385-Predicted forkhead transcription factor[K]
ENSG00000006652	0.733223	33.4065	-5.50973	2.58435e-293	1.1524e-291	down	IFRD1	interferon related developmental regulator 1 [Source:HGNC Symbol;Acc:HGNC:5456]	GO:0007275;GO:0030154;GO:0007518;GO:0005634;GO:0005737;GO:0048671;GO:0043403;GO:0042692;GO:0030517;GO:0014706	-	KOG2842-Interferon-related protein PC4 like[Z]
ENSG00000183624	0.469782	31.9697	-6.08857	9.77429e-292	4.34713e-290	down	HMCES	5-hydroxymethylcytosine binding, ES cell specific [Source:HGNC Symbol;Acc:HGNC:24446]	GO:0006508;GO:0008233;GO:0003677;GO:0016787	-	KOG2618-Uncharacterized conserved protein[S]
ENSG00000175334	82.9394	237.363	-1.51696	2.26256e-291	1.00366e-289	down	BANF1	barrier to autointegration factor 1 [Source:HGNC Symbol;Acc:HGNC:17397]	GO:0005634;GO:0015074;GO:0000793;GO:0003677;GO:0042803;GO:0005515;GO:0005694;GO:0005654;GO:0005829;GO:0005737;GO:0070062;GO:0045071;GO:0008022;GO:0016032;GO:0047485;GO:0019899;GO:0009615;GO:0007077;GO:0051169;GO:0075713;GO:0097726;GO:0007084	-	KOG4233-DNA-bridging protein BAF[BL]
ENSG00000186577	1.66842	74.9697	-5.48975	5.5793e-291	2.46851e-289	down	SMIM29	small integral membrane protein 29 [Source:HGNC Symbol;Acc:HGNC:1340]	GO:0016021;GO:0016020;GO:0005576	-	-
ENSG00000197879	137.811	100.462	0.456039	1.53935e-290	6.79309e-289	-	MYO1C	myosin IC [Source:HGNC Symbol;Acc:HGNC:7597]	GO:0045160;GO:0045121;GO:0032587;GO:0032421;GO:0032420;GO:0031410;GO:0005903;GO:0005634;GO:1900078;GO:0030838;GO:0006810;GO:0051015;GO:0030898;GO:0008022;GO:0005516;GO:0000146;GO:0016604;GO:0005886;GO:0003779;GO:0016459;GO:0003774;GO:0005524;GO:0000166;GO:0015031;GO:0016020;GO:0005737;GO:0051028;GO:0005643;GO:0005654;GO:0042995;GO:0038096;GO:0005730;GO:0005515;GO:0005829;GO:0070062;GO:0001726;GO:…	-	KOG0164-Myosin class I heavy chain[Z]
ENSG00000149100	15.4868	34.5601	-1.15807	3.95062e-290	1.73889e-288	down	EIF3M	eukaryotic translation initiation factor 3 subunit M [Source:HGNC Symbol;Acc:HGNC:24460]	GO:0071541;GO:0006412;GO:0031369;GO:0005515;GO:0005852;GO:0006413;GO:0003743;GO:0005737;GO:0005829;GO:0002183	-	KOG2753-Uncharacterized conserved protein, contains PCI domain[R]
ENSG00000150753	13.9567	51.6182	-1.88692	2.02096e-288	8.87243e-287	down	CCT5	chaperonin containing TCP1 subunit 5 [Source:HGNC Symbol;Acc:HGNC:1618]	GO:0044297;GO:0043209;GO:0005832;GO:0002199;GO:1901998;GO:0007339;GO:0048027;GO:0003730;GO:0005515;GO:0006457;GO:0005829;GO:0005730;GO:0005524;GO:0000166;GO:0005737;GO:0005856;GO:0005874;GO:0051082;GO:0005815;GO:0061077;GO:0070062;GO:0009615;GO:0050821;GO:0032212;GO:0048487;GO:0005813;GO:1904851;GO:1904874;GO:0031681;GO:0044183;GO:0006458;GO:1904871	-	KOG0357-Chaperonin complex component, TCP-1 epsilon subunit (CCT5)[O]
ENSG00000272333	2.48196	15.8208	-2.67228	2.42944e-288	1.06383e-286	down	KMT2B	lysine methyltransferase 2B [Source:HGNC Symbol;Acc:HGNC:15840]	GO:0080182;GO:0051569;GO:0034968;GO:0030728;GO:0016458;GO:0009994;GO:0007613;GO:0001541;GO:0005515;GO:0016569;GO:0003700;GO:0006355;GO:0006351;GO:0003677;GO:0032259;GO:0016740;GO:0008168;GO:0046872;GO:0008270;GO:0005634;GO:0018024;GO:0005654;GO:0035097;GO:0048096;GO:0051568;GO:0042800	K14959-ko00310 Lysine degradation	KOG1084-Transcription factor TCF20[K]
ENSG00000176095	15.9117	33.2819	-1.06465	3.60491e-288	1.57451e-286	down	IP6K1	inositol hexakisphosphate kinase 1 [Source:HGNC Symbol;Acc:HGNC:18360]	GO:0000828;GO:0005515;GO:0008440;GO:0001650;GO:0016310;GO:0016301;GO:0016740;GO:0005829;GO:0005634;GO:0005524;GO:0000166;GO:0005737;GO:0005654;GO:0043647;GO:0000829;GO:0000832;GO:0052723;GO:0052724;GO:0046854;GO:0000827;GO:0052836;GO:0052839	K07756-ko04070 Phosphatidylinositol signaling system	KOG1620-Inositol polyphosphate multikinase, component of the ARGR transcription regulatory complex[KIT]
ENSG00000048140	0.521728	19.8069	-5.24656	1.27894e-287	5.57175e-286	down	TSPAN17	tetraspanin 17 [Source:HGNC Symbol;Acc:HGNC:13594]	GO:0016021;GO:0016020;GO:0016567;GO:0005887;GO:0007166;GO:0019899;GO:0004842;GO:0000151;GO:0072594	-	KOG3882-Tetraspanin family integral membrane protein[R]
ENSG00000205352	25.5737	117.355	-2.19814	3.06959e-287	1.33386e-285	down	PRR13	proline rich 13 [Source:HGNC Symbol;Acc:HGNC:24528]	GO:0005515;GO:0006355;GO:0006351;GO:0005654;GO:0005829;GO:0005634	-	-
ENSG00000221995	1.50887	16.4872	-3.44981	6.28438e-287	2.72387e-285	down	TIAF1	TGFB1-induced anti-apoptotic factor 1 [Source:HGNC Symbol;Acc:HGNC:11803]	GO:0005634;GO:0006915;GO:0003674;GO:0043066;GO:0007249	-	-
ENSG00000086758	25.6433	42.9981	-0.745689	2.04899e-286	8.8585e-285	-	HUWE1	HECT, UBA and WWE domain containing 1, E3 ubiquitin protein ligase [Source:HGNC Symbol;Acc:HGNC:30892]	GO:0016567;GO:0004842;GO:0016740;GO:0005515;GO:0003677;GO:0005654;GO:0005829;GO:0016020;GO:0005737;GO:0005634;GO:0003723;GO:0006281;GO:0006974;GO:0030154;GO:0005576;GO:0070062;GO:0000209;GO:0043312;GO:0006284;GO:0034774;GO:1904813;GO:1903955;GO:0006513;GO:0016574	K10592-ko04120 Ubiquitin mediated proteolysis	KOG0939-E3 ubiquitin-protein ligase/Putative upstream regulatory element binding protein[OK]
ENSG00000267303	0.0001	81.0584	-19.6286	5.41849e-285	2.33667e-283	down	AC011511.4	-	GO:0005634;GO:0000398;GO:0003676	-	-
ENSG00000167325	11.2686	35.4918	-1.65517	6.4409e-284	2.77056e-282	down	RRM1	ribonucleotide reductase catalytic subunit M1 [Source:HGNC Symbol;Acc:HGNC:10451]	GO:0043025;GO:0042995;GO:0005971;GO:0005737;GO:0005635;GO:0060041;GO:0051290;GO:0051259;GO:0021846;GO:0010212;GO:0009263;GO:0008584;GO:0006206;GO:0000278;GO:0097718;GO:0017076;GO:0004748;GO:0008152;GO:0003824;GO:0005515;GO:0055114;GO:0016491;GO:0005829;GO:0005524;GO:0000166;GO:0006260;GO:0070062;GO:0015949;GO:0016021;GO:0016020	K10807-ko00230 Purine metabolism;ko00240 Pyrimidine metabolism;ko00480 Glutathione metabolism	KOG1112-Ribonucleotide reductase, alpha subunit[F]
ENSG00000102125	3.24574	39.781	-3.61546	6.89779e-284	2.95962e-282	down	TAZ	tafazzin [Source:HGNC Symbol;Acc:HGNC:11577]	GO:0008152;GO:0016746;GO:0006644;GO:0016021;GO:0016020;GO:0005737;GO:0005743;GO:0060048;GO:0003841;GO:0005739;GO:0032049;GO:0031966;GO:0006936;GO:0007519;GO:0007507;GO:0035965;GO:0008374;GO:0047184;GO:0030097;GO:0032981;GO:0042407;GO:0042775;GO:0048738;GO:0031224;GO:0005829;GO:0005634	K13511-ko00564 Glycerophospholipid metabolism	KOG2847-Phosphate acyltransferase[I]
ENSG00000167004	5.51526	29.2709	-2.40797	2.17764e-283	9.32008e-282	down	PDIA3	protein disulfide isomerase family A member 3 [Source:HGNC Symbol;Acc:HGNC:4606]	GO:0043209;GO:0009986;GO:0005783;GO:2001238;GO:0015037;GO:0042470;GO:0006508;GO:0005515;GO:0055114;GO:0045454;GO:0016853;GO:0005634;GO:0003723;GO:0005615;GO:0003756;GO:0005925;GO:0005788;GO:0070062;GO:0002479;GO:0006457;GO:0007165;GO:0002474;GO:0006606;GO:0004197;GO:0055038;GO:0045335;GO:0034975;GO:0034976;GO:0004629;GO:0015036;GO:0006621;GO:0005623	K08056-ko04141 Protein processing in endoplasmic reticulum;ko04612 Antigen processing and presentation	KOG0190-Protein disulfide isomerase (prolyl 4-hydroxylase beta subunit)[O]
ENSG00000242372	1097.94	899.524	0.287563	2.28174e-282	9.74115e-281	-	EIF6	eukaryotic translation initiation factor 6 [Source:HGNC Symbol;Acc:HGNC:6159]	GO:0043022;GO:0042256;GO:0005515;GO:0005654;GO:0006413;GO:0006412;GO:0003743;GO:0005737;GO:0005634;GO:0045727;GO:0005730;GO:0030687;GO:0070062;GO:0042254;GO:0005829;GO:0043023;GO:0006110;GO:0032868;GO:2000377;GO:0000470;GO:0000460;GO:0000054;GO:0035195;GO:0035278;GO:0042304;GO:0045652;GO:1902626	K03264-ko03008 Ribosome biogenesis in eukaryotes	KOG3185-Translation initiation factor 6 (eIF-6)[J]
ENSG00000109062	45.1568	1.72195	4.71283	2.92916e-281	1.24738e-279	up	SLC9A3R1	SLC9A3 regulator 1 [Source:HGNC Symbol;Acc:HGNC:11075]	GO:0032947;GO:0097225;GO:0045177;GO:0045121;GO:0032426;GO:0032420;GO:0031528;GO:0031526;GO:0016324;GO:0016020;GO:0005737;GO:2000146;GO:0070293;GO:0060158;GO:0060088;GO:0051898;GO:0045859;GO:0044062;GO:0034635;GO:0034613;GO:0032782;GO:0032416;GO:0030643;GO:0030336;GO:0030036;GO:0019933;GO:0014067;GO:0010766;GO:0010642;GO:0007605;GO:0007191;GO:0003096;GO:0050780;GO:0045159;GO:0032403;GO:0030165;GO:…	-	-
ENSG00000234745	42.1339	132.261	-1.65033	3.44169e-281	1.46199e-279	down	HLA-B	major histocompatibility complex, class I, B [Source:HGNC Symbol;Acc:HGNC:4932]	GO:0006955;GO:0005515;GO:0005794;GO:0005783;GO:0016021;GO:0016020;GO:0002376;GO:0050776;GO:0005886;GO:0005887;GO:0019882;GO:0002474;GO:0042612;GO:0070062;GO:0002479;GO:0005102;GO:0043312;GO:0016032;GO:0030670;GO:0009986;GO:0030667;GO:0000139;GO:0060333;GO:0012507;GO:0060337;GO:0042605;GO:0071556;GO:0031901;GO:0002480;GO:0002667;GO:0032655;GO:0032675;GO:0042270;GO:2001198;GO:0055038	K06751-ko04514 Cell adhesion molecules (CAMs);ko04144 Endocytosis;ko04145 Phagosome;ko04650 Natural killer cell mediated cytotoxicity;ko04612 Antigen processing and presentation;ko05203 Viral carcinogenesis;ko05320 Autoimmune thyroid disease;ko05330 Allograft rejection;ko05332 Graft-versus-host disease;ko05416 Viral myocarditis;ko04940 Type I diabetes mellitus;ko05166 HTLV-I infection;ko05168 Her…	-
ENSG00000237973	584.195	423.088	0.465494	4.67895e-281	1.98262e-279	-	MTCO1P12	mitochondrially encoded cytochrome c oxidase I pseudogene 12 [Source:HGNC Symbol;Acc:HGNC:52014]	-	-	-
ENSG00000086061	13.5095	61.5881	-2.18868	8.03216e-281	3.39503e-279	down	DNAJA1	DnaJ heat shock protein family (Hsp40) member A1 [Source:HGNC Symbol;Acc:HGNC:5229]	GO:1901998;GO:0042769;GO:0030521;GO:0030317;GO:0007283;GO:0005515;GO:0015630;GO:0005739;GO:0006457;GO:0005829;GO:0043231;GO:0005783;GO:0005524;GO:0046872;GO:0016020;GO:0005737;GO:0005634;GO:0048471;GO:0032781;GO:0051082;GO:0031072;GO:0009408;GO:0070062;GO:0043065;GO:0043066;GO:0051087;GO:0006986;GO:0031625;GO:0000151;GO:0050750;GO:0001664;GO:0001671;GO:0055131;GO:0031397;GO:1903748;GO:0098554;GO:…	K09502-ko04141 Protein processing in endoplasmic reticulum	KOG0712-Molecular chaperone (DnaJ superfamily)[O]
ENSG00000171345	498.873	339.629	0.554713	1.01149e-280	4.26478e-279	-	KRT19	keratin 19 [Source:HGNC Symbol;Acc:HGNC:6436]	GO:1990357;GO:0042383;GO:0030018;GO:0016327;GO:0016010;GO:0060706;GO:0007219;GO:0032403;GO:0005882;GO:0005515;GO:0005198;GO:0005829;GO:0070062;GO:0031424;GO:0016032;GO:0005200;GO:0043627;GO:0008307;GO:0043034;GO:0070268;GO:0005886;GO:0045214;GO:0071944	-	-
ENSG00000242125	11.9962	60.4856	-2.33401	3.19069e-280	1.34198e-278	down	SNHG3	small nucleolar RNA host gene 3 [Source:HGNC Symbol;Acc:HGNC:10118]	-	-	-
ENSG00000170144	11.4022	31.9129	-1.48482	8.9662e-280	3.76183e-278	down	HNRNPA3	heterogeneous nuclear ribonucleoprotein A3 [Source:HGNC Symbol;Acc:HGNC:24941]	GO:1990124;GO:0043005;GO:0035770;GO:0005737;GO:0005634;GO:0051028;GO:0051033;GO:0003729;GO:0016070;GO:0005681;GO:0030529;GO:0005654;GO:0008380;GO:0006397;GO:0003723;GO:0003676;GO:0005515;GO:0000398;GO:0071013;GO:0019013	K12741-ko03040 Spliceosome	KOG0118-FOG: RRM domain[R]
ENSG00000161016	1343.02	1139.36	0.237266	1.49549e-279	6.259e-278	-	RPL8	ribosomal protein L8 [Source:HGNC Symbol;Acc:HGNC:10368]	GO:0005840;GO:0006412;GO:0003735;GO:0005622;GO:0030529;GO:0016020;GO:0005737;GO:0003723;GO:0015934;GO:0005925;GO:0005829;GO:0019843;GO:0006413;GO:0006364;GO:0000184;GO:0019083;GO:0006614;GO:0002181;GO:0022625	K02938-ko03010 Ribosome	KOG2309-60s ribosomal protein L2/L8[J]
ENSG00000196586	0.482966	8.90518	-4.20465	2.13735e-279	8.92343e-278	down	MYO6	myosin VI [Source:HGNC Symbol;Acc:HGNC:7605]	GO:0005515;GO:0005886;GO:0003779;GO:0005794;GO:0016459;GO:0003774;GO:0005524;GO:0000166;GO:0015031;GO:0016020;GO:0005737;GO:0005634;GO:0006810;GO:0048471;GO:0005905;GO:0031410;GO:0005654;GO:0006886;GO:0042995;GO:0005516;GO:0045944;GO:0005829;GO:0045296;GO:0006897;GO:0051015;GO:0070062;GO:0005938;GO:0001726;GO:0007605;GO:0031941;GO:0016461;GO:0031965;GO:0030665;GO:0005765;GO:0030330;GO:0030139;GO:…	-	-
ENSG00000188243	10.538	73.2575	-2.79738	3.83127e-278	1.59564e-276	down	COMMD6	COMM domain containing 6 [Source:HGNC Symbol;Acc:HGNC:24015]	GO:0005515;GO:0006355;GO:0006351;GO:0005737;GO:0005634;GO:0051059;GO:0032088	-	-
ENSG00000100462	26.0381	46.9821	-0.851489	8.82431e-274	3.66618e-272	-	PRMT5	protein arginine methyltransferase 5 [Source:HGNC Symbol;Acc:HGNC:10894]	GO:0043234;GO:0097421;GO:0070372;GO:0048714;GO:0045596;GO:0044030;GO:0006479;GO:0032403;GO:0048511;GO:0005515;GO:0005829;GO:0016569;GO:0005794;GO:0006355;GO:0006351;GO:0032259;GO:0016740;GO:0008168;GO:0005634;GO:0005737;GO:0019918;GO:1903507;GO:0000387;GO:0003714;GO:0005654;GO:0043021;GO:0035246;GO:1901796;GO:0032922;GO:0008283;GO:0001046;GO:0090161;GO:0008327;GO:0008469;GO:0016274;GO:0035243;GO:…	K02516-ko03013 RNA transport;ko04011 MAPK signaling pathway - yeast;ko04111 Cell cycle - yeast	KOG0822-Protein kinase inhibitor[D]
ENSG00000166847	26.1372	2.92332	3.16043	1.97328e-273	8.17831e-272	up	DCTN5	dynactin subunit 5 [Source:HGNC Symbol;Acc:HGNC:24594]	GO:0060976;GO:0035904;GO:0003281;GO:0005515;GO:0005694;GO:0031965;GO:0005654;GO:0005737;GO:0005856;GO:0005813;GO:0000775;GO:0000776;GO:0000777;GO:0005829;GO:0019886;GO:0006888	K10427-ko04962 Vasopressin-regulated water reabsorption	KOG3121-Dynactin, subunit p25[Z]
ENSG00000039560	9.61596	30.1633	-1.64929	3.0193e-273	1.24832e-271	down	RAI14	retinoic acid induced 14 [Source:HGNC Symbol;Acc:HGNC:14873]	GO:0001650;GO:0005829;GO:0005634;GO:0005737;GO:0005856;GO:0005938;GO:1901222;GO:0097190;GO:0005739	-	-
ENSG00000130309	59.8422	16.6819	1.84289	1.60219e-272	6.60817e-271	up	COLGALT1	collagen beta(1-O)galactosyltransferase 1 [Source:HGNC Symbol;Acc:HGNC:26182]	GO:0016757;GO:0005783;GO:0016740;GO:0016020;GO:0005788;GO:0050211	K11703-ko00310 Lysine degradation;ko00514 Other types of O-glycan biosynthesis	KOG4179-Lysyl hydrolase/glycosyltransferase family 25[O]
ENSG00000125505	144.782	91.2294	0.66631	2.2101e-272	9.09344e-271	-	MBOAT7	membrane bound O-acyltransferase domain containing 7 [Source:HGNC Symbol;Acc:HGNC:15505]	GO:0016021;GO:0016020;GO:0071617;GO:0008654;GO:0005515;GO:0006629;GO:0016746;GO:0016740;GO:0005789;GO:0003841;GO:0006644;GO:0036149;GO:0021819;GO:0047144;GO:0046488;GO:0021591	K13516-ko00564 Glycerophospholipid metabolism	KOG2706-Predicted membrane protein[S]
ENSG00000116560	144.911	232.507	-0.682101	8.41495e-272	3.45398e-270	-	SFPQ	splicing factor proline and glutamine rich [Source:HGNC Symbol;Acc:HGNC:10774]	GO:0090575;GO:0042382;GO:0070932;GO:0051726;GO:0051276;GO:0045892;GO:0045876;GO:0042754;GO:0042752;GO:0006974;GO:0003682;GO:0001047;GO:0000980;GO:0000976;GO:0048511;GO:0005515;GO:0042803;GO:0006355;GO:0006351;GO:0003677;GO:0005654;GO:0016607;GO:0005737;GO:0005634;GO:0008380;GO:0006397;GO:0003723;GO:0003676;GO:0006281;GO:0006310;GO:0045944;GO:0031012;GO:0000122;GO:0016363;GO:0000785;GO:0042826;GO:…	-	KOG0115-RNA-binding protein p54nrb (RRM superfamily)[A]
ENSG00000131503	4.53752	19.1475	-2.07718	2.71461e-271	1.11156e-269	down	ANKHD1	ankyrin repeat and KH domain containing 1 [Source:HGNC Symbol;Acc:HGNC:24714]	GO:0005515;GO:0005737;GO:0003723;GO:0003676;GO:0045087	-	KOG0504-FOG: Ankyrin repeat[R]
ENSG00000125691	269.262	166.596	0.692662	4.22176e-271	1.72454e-269	-	RPL23	ribosomal protein L23 [Source:HGNC Symbol;Acc:HGNC:10316]	GO:1901798;GO:0071157;GO:2000059;GO:1904667;GO:1990948;GO:0001223;GO:0031625;GO:0005730;GO:0072717;GO:0071158;GO:0005654;GO:0050821;GO:0032986;GO:0010628;GO:0008284;GO:0000122;GO:0045944;GO:0005737;GO:0005515;GO:0043234;GO:0005840;GO:0006412;GO:0003735;GO:0030529;GO:0016020;GO:0003723;GO:0005925;GO:0005829;GO:0070062;GO:0031012;GO:0006413;GO:0006610;GO:0006364;GO:0000184;GO:0019083;GO:0006614;GO:…	K02894-ko03010 Ribosome	KOG0901-60S ribosomal protein L14/L17/L23[J]
ENSG00000143374	1.94143	31.7587	-4.03196	1.05662e-270	4.30584e-269	down	TARS2	threonyl-tRNA synthetase 2, mitochondrial (putative) [Source:HGNC Symbol;Acc:HGNC:30740]	GO:0016874;GO:0042803;GO:0005739;GO:0005524;GO:0000166;GO:0006412;GO:0005737;GO:0005759;GO:0004812;GO:0006418;GO:0006450;GO:0016876;GO:0043039;GO:0004829;GO:0006435;GO:0003674;GO:0005575;GO:0002161;GO:0070159	K01868-ko00970 Aminoacyl-tRNA biosynthesis	KOG1637-Threonyl-tRNA synthetase[J]
ENSG00000127603	7.18631	33.8393	-2.23538	7.66231e-269	3.11503e-267	down	MACF1	microtubule-actin crosslinking factor 1 [Source:HGNC Symbol;Acc:HGNC:13664]	GO:0005856;GO:0003779;GO:0005509;GO:0008017;GO:0016055;GO:0016887;GO:0005515;GO:0005886;GO:0005794;GO:0046872;GO:0016020;GO:0005737;GO:0003723;GO:0005874;GO:0042995;GO:0045296;GO:0051015;GO:0045773;GO:0042060;GO:0051893;GO:0032587;GO:0032886;GO:0030177;GO:0010632;GO:0043001;GO:0016021;GO:0015629;GO:0030054	-	KOG0516-Dystonin, GAS (Growth-arrest-specific protein), and related proteins[Z]
ENSG00000141367	3.94108	27.3657	-2.79571	8.0451e-269	3.26286e-267	down	CLTC	clathrin heavy chain [Source:HGNC Symbol;Acc:HGNC:2092]	GO:0030118;GO:0048268;GO:0032802;GO:0097718;GO:0034383;GO:0042470;GO:0005515;GO:0005198;GO:0051301;GO:0016192;GO:0006886;GO:0016020;GO:0005737;GO:0003723;GO:0007049;GO:0005856;GO:0005905;GO:0030130;GO:0030132;GO:0030659;GO:0031410;GO:0005764;GO:0005768;GO:0005925;GO:0006914;GO:0005819;GO:0005886;GO:0005829;GO:0070062;GO:0061024;GO:0060071;GO:0042147;GO:0043234;GO:0031012;GO:0007018;GO:0019886;GO:…	K04646-ko04144 Endocytosis;ko04142 Lysosome;ko04961 Endocrine and other factor-regulated calcium reabsorption;ko04721 Synaptic vesicle cycle;ko05016 Huntington's disease;ko05100 Bacterial invasion of epithelial cells	KOG0985-Vesicle coat protein clathrin, heavy chain[U]
ENSG00000197586	50.7287	9.32506	2.44362	9.7865e-269	3.9597e-267	up	ENTPD6	ectonucleoside triphosphate diphosphohydrolase 6 (putative) [Source:HGNC Symbol;Acc:HGNC:3368]	GO:0005576;GO:0016787;GO:0005794;GO:0016021;GO:0016020;GO:0000139;GO:0070062;GO:0017110;GO:0045134;GO:0034656;GO:0009986;GO:0005886;GO:0005615;GO:0051592;GO:0032026;GO:0017111;GO:0008894	K01511-ko00230 Purine metabolism;ko00240 Pyrimidine metabolism	KOG1385-Nucleoside phosphatase[F]
ENSG00000113368	1.07914	27.8883	-4.69171	1.62095e-267	6.54295e-266	down	LMNB1	lamin B1 [Source:HGNC Symbol;Acc:HGNC:6637]	GO:0005882;GO:0005198;GO:0016363;GO:0005654;GO:0005638;GO:0005637;GO:0005635;GO:0005634;GO:0043274;GO:0005515;GO:0031965;GO:0016020	K07611-ko04210 Apoptosis;ko04214 Apoptosis - fly	KOG0977-Nuclear envelope protein lamin, intermediate filament superfamily[DY]
ENSG00000169045	7.25334	86.974	-3.58387	3.34344e-267	1.34639e-265	down	HNRNPH1	heterogeneous nuclear ribonucleoprotein H1 [Source:HGNC Symbol;Acc:HGNC:5041]	GO:0016070;GO:0005681;GO:0030529;GO:0005654;GO:0005829;GO:0016020;GO:0005634;GO:0008380;GO:0006397;GO:0003723;GO:0003676;GO:0005515;GO:0043484;GO:0000398;GO:0008543;GO:0006396;GO:0071013;GO:0008266	-	KOG4211-Splicing factor hnRNP-F and related RNA-binding proteins[A]
ENSG00000118482	0.330534	18.1929	-5.78243	8.47648e-266	3.40539e-264	down	PHF3	PHD finger protein 3 [Source:HGNC Symbol;Acc:HGNC:8921]	GO:0006351;GO:0046872;GO:0008270;GO:0007275;GO:0003674;GO:0005575	-	-
ENSG00000129562	21.7923	143.227	-2.71641	1.84362e-265	7.38923e-264	down	DAD1	defender against cell death 1 [Source:HGNC Symbol;Acc:HGNC:2664]	GO:0043066;GO:0042493;GO:0007584;GO:0001824;GO:0005789;GO:0005783;GO:0016021;GO:0016020;GO:0006915;GO:0006486;GO:0004579;GO:0008250;GO:0070062;GO:0006487;GO:0018279;GO:0004576;GO:0016740	K12668-ko00510 N-Glycan biosynthesis;ko00513 Various types of N-glycan biosynthesis;ko04141 Protein processing in endoplasmic reticulum	KOG1746-Defender against cell death protein/oligosaccharyltransferase, epsilon subunit[DO]
ENSG00000146963	2.94909	31.8553	-3.43319	2.48977e-265	9.95556e-264	down	LUC7L2	LUC7 like 2, pre-mRNA splicing factor [Source:HGNC Symbol;Acc:HGNC:21608]	GO:0005515;GO:0016607;GO:0005634;GO:0003729;GO:0003723;GO:0005654;GO:0005685;GO:0006376;GO:0019899;GO:0071004	-	KOG0796-Spliceosome subunit[A]
ENSG00000153201	0.399244	6.29171	-3.97811	2.93119e-264	1.16932e-262	down	RANBP2	RAN binding protein 2 [Source:HGNC Symbol;Acc:HGNC:9848]	GO:1990723;GO:0044614;GO:0005739;GO:0005643;GO:0090526;GO:0033133;GO:0001975;GO:0032403;GO:0060964;GO:0005515;GO:0016874;GO:0043547;GO:0006457;GO:0000413;GO:0003755;GO:0031965;GO:0046872;GO:0008270;GO:0043231;GO:0015031;GO:0016020;GO:0005634;GO:0051028;GO:0006810;GO:0003723;GO:0046907;GO:0005737;GO:0005096;GO:0005813;GO:0005829;GO:0075733;GO:0006607;GO:0016925;GO:0007051;GO:0007062;GO:0019789;GO:…	K12172-ko03013 RNA transport	KOG0864-Ran-binding protein RANBP1 and related RanBD domain proteins[U]
ENSG00000210127	29882.7	25414	0.233686	4.12819e-264	1.64298e-262	-	MT-TA	mitochondrially encoded tRNA alanine [Source:HGNC Symbol;Acc:HGNC:7475]	-	-	-
ENSG00000154174	0.256003	14.3173	-5.80545	1.39187e-263	5.5266e-262	down	TOMM70	translocase of outer mitochondrial membrane 70 [Source:HGNC Symbol;Acc:HGNC:11985]	GO:0005739;GO:0071806;GO:0016021;GO:0016020;GO:0005741;GO:0005515;GO:0070062;GO:0016236;GO:0008320;GO:0006626;GO:0005742	-	KOG0547-Translocase of outer mitochondrial membrane complex, subunit TOM70/TOM72[U]
ENSG00000132463	1.05803	11.9234	-3.49435	1.21537e-262	4.81457e-261	down	GRSF1	G-rich RNA sequence binding factor 1 [Source:HGNC Symbol;Acc:HGNC:4610]	GO:0005739;GO:0016331;GO:0009952;GO:0008033;GO:0005737;GO:0006397;GO:0006396;GO:0003723;GO:0003676;GO:0042645;GO:0003729;GO:0035770;GO:0006378	-	-
ENSG00000109111	58.9059	40.8146	0.529329	1.5809e-262	6.24802e-261	-	SUPT6H	SPT6 homolog, histone chaperone [Source:HGNC Symbol;Acc:HGNC:11470]	GO:0061086;GO:0051147;GO:0050684;GO:0045191;GO:0032968;GO:0010793;GO:0005515;GO:0006355;GO:0006351;GO:0006357;GO:0006139;GO:0003677;GO:0005634;GO:0051028;GO:0006810;GO:0008380;GO:0006397;GO:0003723;GO:0003676;GO:0032784;GO:0005654;GO:0016032;GO:0042393;GO:0006338;GO:0006366;GO:0006368;GO:0003700;GO:0006342;GO:0031491;GO:0000991;GO:0008023;GO:0035327;GO:0034728;GO:0042789;GO:0070827	-	KOG1856-Transcription elongation factor SPT6[A]
ENSG00000172037	258.703	164.381	0.654252	2.37835e-262	9.37796e-261	-	LAMB2	laminin subunit beta 2 [Source:HGNC Symbol;Acc:HGNC:6487]	GO:0043256;GO:0045202;GO:0043083;GO:0005615;GO:0005605;GO:0005608;GO:0005604;GO:0072274;GO:0072249;GO:0050808;GO:0060041;GO:0048677;GO:0031175;GO:0014002;GO:0014044;GO:0007601;GO:0007528;GO:0000904;GO:0007411;GO:0005178;GO:0005576;GO:0007155;GO:0005578;GO:0070062;GO:0044267;GO:0031012;GO:0030198;GO:0005198;GO:0005788;GO:0043260;GO:0043687	K06243-ko04151 PI3K-Akt signaling pathway;ko04512 ECM-receptor interaction;ko04510 Focal adhesion;ko05200 Pathways in cancer;ko05222 Small cell lung cancer;ko05146 Amoebiasis;ko05145 Toxoplasmosis	KOG0994-Extracellular matrix glycoprotein Laminin subunit beta[W]
ENSG00000119522	16.2638	2.63063	2.62818	4.1911e-262	1.64876e-260	up	DENND1A	DENN domain containing 1A [Source:HGNC Symbol;Acc:HGNC:29324]	GO:0045202;GO:0043025;GO:0030665;GO:0030425;GO:0030136;GO:0048488;GO:0043547;GO:0032456;GO:1901981;GO:0032266;GO:0017137;GO:0017124;GO:0017112;GO:0005886;GO:0005654;GO:0005829;GO:0043231;GO:0015031;GO:0016020;GO:0006810;GO:0030054;GO:0031410;GO:0005085;GO:0008289;GO:0006897;GO:0061024;GO:0042734;GO:0032483	-	KOG3569-RAS signaling inhibitor ST5[T]
ENSG00000258388	3.74845	25.1114	-2.74398	2.25703e-261	8.85857e-260	down	PPT2-EGFL8	PPT2-EGFL8 readthrough (NMD candidate) [Source:HGNC Symbol;Acc:HGNC:48343]	GO:0016021;GO:0016020;GO:0008474;GO:0016790;GO:0098599;GO:0098734	-	-
ENSG00000064932	12.2829	41.4563	-1.75494	8.44381e-261	3.30648e-259	down	SBNO2	strawberry notch homolog 2 [Source:HGNC Symbol;Acc:HGNC:29158]	GO:0006355;GO:0006351;GO:0030154;GO:0050727;GO:0005575;GO:0071222;GO:0001503;GO:0045892;GO:0071354;GO:0002281;GO:0071348;GO:1990830	-	KOG1513-Nuclear helicase MOP-3/SNO (DEAD-box superfamily)[KT]
ENSG00000115306	11.0355	31.3782	-1.50762	1.3765e-260	5.37782e-259	down	SPTBN1	spectrin beta, non-erythrocytic 1 [Source:HGNC Symbol;Acc:HGNC:11275]	GO:0043234;GO:0032437;GO:0031430;GO:0030863;GO:0030673;GO:0016020;GO:0014069;GO:0005886;GO:0005634;GO:0072661;GO:0007184;GO:0007182;GO:0032403;GO:0007010;GO:0005200;GO:0005515;GO:0043547;GO:0051693;GO:0003779;GO:0005737;GO:0003723;GO:0005856;GO:0005543;GO:0008091;GO:0005516;GO:0005829;GO:0045296;GO:0070062;GO:0000165;GO:0007411;GO:0006888;GO:0005088;GO:1903076;GO:0030506;GO:0005730;GO:0014731;GO:…	-	KOG0035-Ca2+-binding actin-bundling protein (actinin), alpha chain (EF-Hand protein superfamily)[Z]
ENSG00000123975	2.46951	101.894	-5.36671	1.95129e-260	7.60601e-259	down	CKS2	CDC28 protein kinase regulatory subunit 2 [Source:HGNC Symbol;Acc:HGNC:2000]	GO:0044772;GO:0008283;GO:0007127;GO:0006357;GO:0003682;GO:0051301;GO:0007049;GO:0019901;GO:0019005;GO:0016538;GO:0043130;GO:0005515;GO:0045893;GO:0042393;GO:0007346;GO:0045737;GO:0000307;GO:0061575	K02219-ko04111 Cell cycle - yeast;ko05200 Pathways in cancer;ko05222 Small cell lung cancer	KOG3484-Cyclin-dependent protein kinase CDC28, regulatory subunit CKS1, and related proteins[D]
ENSG00000172809	2475.91	2009.35	0.301231	2.37168e-260	9.22355e-259	-	RPL38	ribosomal protein L38 [Source:HGNC Symbol;Acc:HGNC:10349]	GO:0005840;GO:0006412;GO:0003735;GO:0005622;GO:0030529;GO:0005925;GO:0005829;GO:0006413;GO:0003723;GO:0006364;GO:0000184;GO:0019083;GO:0006614;GO:0022625;GO:0033291;GO:0048318;GO:0042474;GO:0034463;GO:0006417;GO:0007605;GO:0001503;GO:0001501	K02923-ko03010 Ribosome	KOG3499-60S ribosomal protein L38[J]
ENSG00000198363	3.91959	44.3662	-3.50069	5.33922e-260	2.07171e-258	down	ASPH	aspartate beta-hydroxylase [Source:HGNC Symbol;Acc:HGNC:757]	GO:0016020;GO:0016021;GO:0018193;GO:0005515;GO:0005886;GO:0005789;GO:0005783;GO:0055114;GO:0016491;GO:0046872;GO:0051213;GO:0005509;GO:0034220;GO:0016529;GO:0006936;GO:1903779;GO:0005198;GO:0033017;GO:0009055;GO:0008307;GO:0004597;GO:0045862;GO:0097202;GO:0032541;GO:0005737;GO:1901879;GO:0060325;GO:0060021;GO:0042264;GO:0035108;GO:0031647;GO:0008285;GO:0007389	-	KOG3696-Aspartyl beta-hydroxylase[O]
ENSG00000243449	3926.54	3278.25	0.260335	2.17897e-258	8.43557e-257	-	C4orf48	chromosome 4 open reading frame 48 [Source:HGNC Symbol;Acc:HGNC:34437]	GO:0005576	-	-
ENSG00000177156	374.931	256.752	0.546249	2.21417e-258	8.5524e-257	-	TALDO1	transaldolase 1 [Source:HGNC Symbol;Acc:HGNC:11559]	GO:0043231;GO:0005829;GO:0019682;GO:0006098;GO:0009052;GO:0006002;GO:0048029;GO:0030246;GO:0004801;GO:0005515;GO:0005975;GO:0003824;GO:0016740;GO:0005737;GO:0005634;GO:0070062;GO:0005999	K00616-ko01200 Carbon metabolism;ko01230 Biosynthesis of amino acids;ko00030 Pentose phosphate pathway	KOG2772-Transaldolase[G]
ENSG00000198727	1045.28	817.775	0.354118	3.20054e-258	1.23344e-256	-	MT-CYB	mitochondrially encoded cytochrome b [Source:HGNC Symbol;Acc:HGNC:7427]	GO:0043234;GO:0031305;GO:0016020;GO:0005743;GO:0005739;GO:0055093;GO:0051592;GO:0046689;GO:0046688;GO:0046686;GO:0045471;GO:0042538;GO:0042493;GO:0033762;GO:0033590;GO:0031100;GO:0015992;GO:0014070;GO:0010243;GO:0009725;GO:0009636;GO:0009408;GO:0007584;GO:0001666;GO:0032403;GO:0009055;GO:1902600;GO:0055114;GO:0016491;GO:0046872;GO:0016021;GO:0070469;GO:0022904;GO:0008121;GO:0006122;GO:0005750;GO:…	K00412-ko00190 Oxidative phosphorylation;ko02020 Two-component system;ko04260 Cardiac muscle contraction;ko05010 Alzheimer's disease;ko05012 Parkinson's disease;ko05016 Huntington's disease;ko04932 Non-alcoholic fatty liver disease (NAFLD)	KOG4663-Cytochrome b[C]
ENSG00000109534	2.06508	52.916	-4.67943	4.79468e-258	1.84362e-256	down	GAR1	GAR1 ribonucleoprotein [Source:HGNC Symbol;Acc:HGNC:14264]	GO:0001650;GO:0030529;GO:0005634;GO:0003723;GO:0001522;GO:0042254;GO:0031429;GO:0006364;GO:0005730;GO:0005515;GO:0005654;GO:0000784;GO:0070034;GO:0007004;GO:0005697;GO:0015030;GO:0034513;GO:0031118;GO:0072589;GO:0090661;GO:0000454	K11128-ko03008 Ribosome biogenesis in eukaryotes	KOG3262-H/ACA small nucleolar RNP component GAR1[J]
ENSG00000178605	5.6088	46.8534	-3.06239	7.4214e-258	2.84721e-256	down	GTPBP6	GTP binding protein 6 (putative) [Source:HGNC Symbol;Acc:HGNC:30189]	GO:0005525	-	-
ENSG00000099795	1182.84	797.047	0.569522	1.08946e-257	4.1703e-256	-	NDUFB7	NADH:ubiquinone oxidoreductase subunit B7 [Source:HGNC Symbol;Acc:HGNC:7702]	GO:0005743;GO:0005739;GO:0055114;GO:0016020;GO:0070469;GO:0008137;GO:0003954;GO:0005758;GO:0006120;GO:0032981;GO:0005747	K03963-ko00190 Oxidative phosphorylation;ko05010 Alzheimer's disease;ko05012 Parkinson's disease;ko05016 Huntington's disease;ko04932 Non-alcoholic fatty liver disease (NAFLD)	KOG3468-NADH:ubiquinone oxidoreductase, NDUFB7/B18 subunit[C]
ENSG00000176101	101.943	37.1477	1.45642	7.81246e-257	2.9838e-255	up	SSNA1	SS nuclear autoantigen 1 [Source:HGNC Symbol;Acc:HGNC:11321]	GO:0005813;GO:0036064;GO:0060830;GO:0042073;GO:0042802;GO:0005515;GO:0005737;GO:0005634;GO:0005856;GO:0005815;GO:0005829;GO:0000086;GO:0097711	-	-
ENSG00000092201	15.5739	47.6193	-1.61242	1.08471e-256	4.13354e-255	down	SUPT16H	SPT16 homolog, facilitates chromatin remodeling subunit [Source:HGNC Symbol;Acc:HGNC:11465]	GO:0005515;GO:0005694;GO:0006355;GO:0006351;GO:0005634;GO:0003723;GO:0006281;GO:0006974;GO:0006260;GO:0005654;GO:0006368;GO:0006366;GO:1901796;GO:0042393;GO:0031491;GO:0032786;GO:0032968;GO:0006337;GO:0034724;GO:0035101	-	KOG1189-Global transcriptional regulator, cell division control protein[E]
ENSG00000116786	2.5409	21.4251	-3.07589	4.60725e-256	1.75178e-254	down	PLEKHM2	pleckstrin homology and RUN domain containing M2 [Source:HGNC Symbol;Acc:HGNC:29131]	GO:0005515;GO:0005737;GO:0019894;GO:0007030;GO:0032418;GO:0032880;GO:0010008;GO:1903527	K15348-ko05132 Salmonella infection	-
ENSG00000130303	473.664	296.731	0.674709	2.40445e-255	9.12191e-254	-	BST2	bone marrow stromal cell antigen 2 [Source:HGNC Symbol;Acc:HGNC:1119]	GO:0009986;GO:0045087;GO:1901253;GO:0045071;GO:0035456;GO:0035455;GO:0034341;GO:0009615;GO:0004871;GO:0005515;GO:0005886;GO:0042803;GO:0010951;GO:0005794;GO:0005829;GO:0016021;GO:0016020;GO:0005737;GO:0003723;GO:0031225;GO:0051607;GO:0045121;GO:0002376;GO:0005768;GO:0070062;GO:0032956;GO:0005770;GO:0005887;GO:0043312;GO:0043123;GO:0042113;GO:0007267;GO:0016324;GO:0007275;GO:0030308;GO:0035577;GO:…	-	-
ENSG00000124795	15.5133	52.3334	-1.75423	3.0728e-255	1.16316e-253	down	DEK	DEK proto-oncogene [Source:HGNC Symbol;Acc:HGNC:2768]	GO:0043292;GO:0005634;GO:2001032;GO:0016569;GO:0003677;GO:0003723;GO:0003682;GO:0005654;GO:0006338;GO:0045815;GO:0007165;GO:0042393;GO:0006366;GO:0006357;GO:0019079;GO:2000779	-	KOG2266-Chromatin-associated protein Dek and related proteins, contains SAP DNA binding domain[B]
ENSG00000164587	603.431	426.349	0.501154	2.73438e-254	1.03276e-252	-	RPS14	ribosomal protein S14 [Source:HGNC Symbol;Acc:HGNC:10387]	GO:0005739;GO:0005515;GO:0005840;GO:0006412;GO:0003735;GO:0030529;GO:0016020;GO:0003723;GO:0030218;GO:0000028;GO:0022627;GO:0005925;GO:0005730;GO:0000462;GO:0000122;GO:0005829;GO:0070062;GO:0005654;GO:0031012;GO:0006413;GO:0006364;GO:0048027;GO:0000184;GO:0019083;GO:0006417;GO:0006614;GO:0030490;GO:0045182;GO:0070181	K02955-ko03010 Ribosome	KOG0407-40S ribosomal protein S14[J]
ENSG00000233927	3979.34	3700.87	0.104662	1.12737e-252	4.24858e-251	-	RPS28	ribosomal protein S28 [Source:HGNC Symbol;Acc:HGNC:10418]	GO:0022627;GO:0005515;GO:0005840;GO:0006412;GO:0003735;GO:0005622;GO:0030529;GO:0003723;GO:0006364;GO:0042274;GO:0000028;GO:0005829;GO:0070062;GO:0042254;GO:0005654;GO:0006413;GO:0030490;GO:0000184;GO:0019083;GO:0006614;GO:0015935	K02979-ko03010 Ribosome	KOG3502-40S ribosomal protein S28[J]
ENSG00000257315	0.052838	5.07153	-6.5847	1.10374e-251	4.15035e-250	down	ZBED6	zinc finger BED-type containing 6 [Source:HGNC Symbol;Acc:HGNC:33273]	GO:0006355;GO:0006351;GO:0003677;GO:0046983;GO:0046872;GO:0005634;GO:0003676;GO:0003700;GO:0005730;GO:0000977;GO:0006357;GO:0045892;GO:0005515;GO:0051028;GO:0006810;GO:0003723;GO:0005654;GO:0006369;GO:0006405;GO:0031124;GO:0006406;GO:0000346;GO:0016973	-	KOG4791-Uncharacterized conserved protein[S]
ENSG00000198712	8074.56	7677.4	0.0727666	1.31558e-250	4.93605e-249	-	MT-CO2	mitochondrially encoded cytochrome c oxidase II [Source:HGNC Symbol;Acc:HGNC:7421]	GO:0005739;GO:0009409;GO:0007595;GO:0005743;GO:1902600;GO:0005515;GO:0022900;GO:0055114;GO:0016491;GO:0046872;GO:0016020;GO:0016021;GO:0070469;GO:0004129;GO:0005507;GO:0070062;GO:0006123;GO:0005751;GO:0045277;GO:0042773	K02261-ko00190 Oxidative phosphorylation;ko04260 Cardiac muscle contraction;ko05010 Alzheimer's disease;ko05012 Parkinson's disease;ko05016 Huntington's disease;ko04932 Non-alcoholic fatty liver disease (NAFLD)	KOG4767-Cytochrome c oxidase, subunit II, and related proteins[C]
ENSG00000092929	109.872	85.1818	0.367207	1.49763e-250	5.60674e-249	-	UNC13D	unc-13 homolog D [Source:HGNC Symbol;Acc:HGNC:23147]	GO:0005829;GO:0016020;GO:0005737;GO:0005764;GO:0005576;GO:0005783;GO:0005515;GO:0005768;GO:0006887;GO:0005770;GO:0055037;GO:0043312;GO:0045921;GO:0035578;GO:0017137;GO:1903307;GO:0033093;GO:0070382;GO:0043304;GO:1900026;GO:0051607;GO:0043320;GO:0006909;GO:0002467;GO:0002432	-	KOG1328-Synaptic vesicle protein BAIAP3, involved in vesicle priming/regulation[UT]
ENSG00000171425	1.22761	46.1451	-5.23226	1.74244e-250	6.50891e-249	down	ZNF581	zinc finger protein 581 [Source:HGNC Symbol;Acc:HGNC:25017]	GO:0005515;GO:0006355;GO:0006351;GO:0003677;GO:0046872;GO:0005634;GO:0003676	-	KOG1721-FOG: Zn-finger[R]
ENSG00000167615	2.97401	25.7662	-3.115	4.6348e-250	1.72755e-248	down	LENG8	leukocyte receptor cluster member 8 [Source:HGNC Symbol;Acc:HGNC:15500]	GO:0005515	-	KOG1861-Leucine permease transcriptional regulator[K]
ENSG00000131469	2747.04	2009.37	0.45113	2.53882e-249	9.44243e-248	-	RPL27	ribosomal protein L27 [Source:HGNC Symbol;Acc:HGNC:10328]	GO:0005840;GO:0006412;GO:0003735;GO:0005622;GO:0030529;GO:0016020;GO:0005634;GO:0003723;GO:0005925;GO:0006364;GO:0005829;GO:0070062;GO:0031012;GO:0006413;GO:0000184;GO:0019083;GO:0006614;GO:0022625	K02901-ko03010 Ribosome	KOG3418-60S ribosomal protein L27[J]
ENSG00000132471	7.03167	45.4016	-2.69081	2.93722e-248	1.09003e-246	down	WBP2	WW domain binding protein 2 [Source:HGNC Symbol;Acc:HGNC:12738]	GO:0006366;GO:0045944;GO:0001105;GO:0045815;GO:0071391;GO:0000790;GO:0005515;GO:0031490;GO:0045184;GO:0000979;GO:0071442	-	KOG3294-WW domain binding protein WBP-2, contains GRAM domain[T]
ENSG00000120694	0.464577	14.8435	-4.99777	4.23969e-247	1.56998e-245	down	HSPH1	heat shock protein family H (Hsp110) member 1 [Source:HGNC Symbol;Acc:HGNC:16969]	GO:0005515;GO:0005829;GO:0005654;GO:0005524;GO:0000166;GO:0005737;GO:0006898;GO:0005576;GO:0070062;GO:0006986;GO:1900034;GO:0000774;GO:0071682;GO:0051135;GO:0045345;GO:0005874;GO:0005634;GO:2001234;GO:1903753;GO:1903751;GO:1903748;GO:0061098;GO:0051085;GO:0045944;GO:0043014	K09485-ko04141 Protein processing in endoplasmic reticulum	KOG0103-Molecular chaperones HSP105/HSP110/SSE1, HSP70 superfamily[O]
ENSG00000173473	2.3834	19.6525	-3.04362	1.49351e-246	5.51855e-245	down	SMARCC1	SWI/SNF related, matrix associated, actin dependent regulator of chromatin subfamily c member 1 [Source:HGNC Symbol;Acc:HGNC:11104]	GO:0090544;GO:0071565;GO:0071564;GO:0016514;GO:0005634;GO:0005622;GO:0001741;GO:0045944;GO:0032435;GO:0030850;GO:0009887;GO:0008286;GO:0003682;GO:0043044;GO:0005515;GO:0000790;GO:0016569;GO:0006355;GO:0006351;GO:0003677;GO:0005654;GO:0007399;GO:0045893;GO:0047485;GO:0003713;GO:0043234;GO:0006338;GO:0006337;GO:0006357;GO:0031492;GO:0000978;GO:0000980	-	KOG1279-Chromatin remodeling factor subunit and related transcription factors[B]
ENSG00000183011	645.91	260.455	1.3103	4.99987e-246	1.84346e-244	up	NAA38	N(alpha)-acetyltransferase 38, NatC auxiliary subunit [Source:HGNC Symbol;Acc:HGNC:28212]	GO:0005634;GO:0031417;GO:0005515;GO:0005737;GO:0043066;GO:0005844	-	-
ENSG00000282827	25.08	6.3986	1.97071	1.60645e-245	5.91021e-244	up	AC134772.2	-	GO:0090305;GO:0000077;GO:0004527	-	-
ENSG00000027847	29.5177	7.48972	1.97859	5.47117e-244	2.00853e-242	up	B4GALT7	beta-1,4-galactosyltransferase 7 [Source:HGNC Symbol;Acc:HGNC:930]	GO:0016757;GO:0005515;GO:0005975;GO:0005794;GO:0016740;GO:0046872;GO:0016021;GO:0016020;GO:0006486;GO:0032580;GO:0006464;GO:0000139;GO:0030203;GO:0008378;GO:0003831;GO:0006487;GO:0006029;GO:0006024;GO:0030145;GO:0048147;GO:0097435;GO:0046525	K00733-ko00532 Glycosaminoglycan biosynthesis - chondroitin sulfate / dermatan sulfate;ko00534 Glycosaminoglycan biosynthesis - heparan sulfate / heparin	KOG3917-Beta-1,4-galactosyltransferase B4GALT7/SQV-3[G]
ENSG00000107819	21.9632	2.07928	3.40093	9.77713e-244	3.58158e-242	up	SFXN3	sideroflexin 3 [Source:HGNC Symbol;Acc:HGNC:16087]	GO:0006811;GO:0005739;GO:0034220;GO:0016020;GO:0055085;GO:0016021;GO:0006810;GO:0015075;GO:0031966;GO:0055072	-	KOG3767-Sideroflexin[R]
ENSG00000173915	118.965	438.554	-1.88222	2.74285e-243	1.00261e-241	down	USMG5	up-regulated during skeletal muscle growth 5 homolog (mouse) [Source:HGNC Symbol;Acc:HGNC:30889]	GO:0005743;GO:0005739;GO:0016021;GO:0016020;GO:0031966;GO:0070062;GO:0005753	-	-
ENSG00000078902	9.2718	38.3406	-2.04795	1.72334e-241	6.28593e-240	down	TOLLIP	toll interacting protein [Source:HGNC Symbol;Acc:HGNC:16476]	GO:0048471;GO:0016604;GO:0033235;GO:0032183;GO:0031625;GO:0031624;GO:0005150;GO:0007165;GO:0004871;GO:0005515;GO:0016310;GO:0005737;GO:0002376;GO:0006954;GO:0045087;GO:0006914;GO:0005576;GO:0005829;GO:0070062;GO:0043312;GO:0043130;GO:0007267;GO:0030855;GO:0035580;GO:0035556;GO:0035578;GO:0019900;GO:0006511;GO:0035325;GO:0045321;GO:0045323;GO:0036010;GO:0045092	K05402-ko04620 Toll-like receptor signaling pathway	-
ENSG00000161960	1332.89	1184.64	0.170111	2.54032e-241	9.24613e-240	-	EIF4A1	eukaryotic translation initiation factor 4A1 [Source:HGNC Symbol;Acc:HGNC:3282]	GO:0005524;GO:0003676;GO:0004386;GO:0016787;GO:0000166;GO:0005515;GO:0006413;GO:0006412;GO:0003743;GO:0016020;GO:0005737;GO:0003723;GO:0003729;GO:0005829;GO:0070062;GO:0004004;GO:0010501;GO:0000289;GO:0031012;GO:0016032;GO:0010468;GO:0003725;GO:0016281;GO:0008135;GO:0000339	K03257-ko03013 RNA transport	KOG0327-Translation initiation factor 4F, helicase subunit (eIF-4A) and related helicases[J]
ENSG00000114867	21.9748	61.3418	-1.48102	3.63035e-241	1.31854e-239	down	EIF4G1	eukaryotic translation initiation factor 4 gamma 1 [Source:HGNC Symbol;Acc:HGNC:3296]	GO:0005515;GO:0006446;GO:0006413;GO:0006412;GO:0003743;GO:0016020;GO:0003723;GO:0008190;GO:0005829;GO:0045296;GO:0043488;GO:0000289;GO:0006417;GO:0010507;GO:0005737;GO:0016032;GO:0005634;GO:0008135;GO:0007005;GO:0005524;GO:0000184;GO:0016281;GO:1901215;GO:0033138;GO:0008284;GO:1905606;GO:0010801;GO:0030307;GO:0034645;GO:0022627;GO:0003729;GO:0031369;GO:0032947;GO:0002191;GO:0032270;GO:0032502;GO:…	K03260-ko03013 RNA transport;ko05416 Viral myocarditis	KOG0401-Translation initiation factor 4F, ribosome/mRNA-bridging subunit (eIF-4G)[J]
ENSG00000267607	63.4602	27.5626	1.20314	5.13142e-241	1.85976e-239	up	AC011511.5	-	-	-	-
ENSG00000169908	20.6724	82.3335	-1.99377	2.19866e-240	7.9516e-239	down	TM4SF1	transmembrane 4 L six family member 1 [Source:HGNC Symbol;Acc:HGNC:11853]	GO:0016021;GO:0016020;GO:0005887;GO:0003674;GO:0008150	-	-
ENSG00000115464	0.672496	7.76217	-3.52886	4.45614e-240	1.60818e-238	down	USP34	ubiquitin specific peptidase 34 [Source:HGNC Symbol;Acc:HGNC:20066]	GO:0006508;GO:0008234;GO:0008233;GO:0016787;GO:0016579;GO:0036459;GO:0006511;GO:0016055;GO:0005515;GO:0005829;GO:0004843;GO:0071108;GO:0090263;GO:0004197	-	KOG1866-Ubiquitin carboxyl-terminal hydrolase[O]
ENSG00000140259	0.046061	34.9218	-9.56637	3.76346e-239	1.35532e-237	down	MFAP1	microfibrillar associated protein 1 [Source:HGNC Symbol;Acc:HGNC:7032]	GO:0005515;GO:0005634;GO:0003723;GO:0005576;GO:0008150;GO:0001527	-	KOG1425-Microfibrillar-associated protein MFAP1[Z]
ENSG00000103363	520.247	347.056	0.584027	1.28877e-238	4.6314e-237	-	ELOB	elongin B [Source:HGNC Symbol;Acc:HGNC:11619]	GO:0070449;GO:0005515;GO:0006355;GO:0006351;GO:0016567;GO:0005634;GO:0005829;GO:0070062;GO:0061418;GO:0005654;GO:0031625;GO:0006366;GO:0006368;GO:0006461;GO:0043687;GO:0031466;GO:0030891;GO:0031462;GO:0003746;GO:0006414	K03873-ko04120 Ubiquitin mediated proteolysis;ko04066 HIF-1 signaling pathway;ko05200 Pathways in cancer;ko05211 Renal cell carcinoma	KOG4495-RNA polymerase II transcription elongation factor Elongin/SIII, subunit elongin B[K]
ENSG00000135387	5.11538	33.4938	-2.71098	3.25029e-238	1.16559e-236	down	CAPRIN1	cell cycle associated protein 1 [Source:HGNC Symbol;Acc:HGNC:6743]	GO:0010494;GO:0061003;GO:0050775;GO:0005829;GO:0016020;GO:0005737;GO:0003723;GO:0030154;GO:0030425;GO:0042995;GO:0000932;GO:0005887;GO:0017148;GO:0005515	-	-
ENSG00000114391	1573.77	1197.96	0.39364	1.98904e-236	7.11791e-235	-	RPL24	ribosomal protein L24 [Source:HGNC Symbol;Acc:HGNC:10325]	GO:0060041;GO:0031290;GO:0021554;GO:0010458;GO:0007093;GO:0006412;GO:0000027;GO:0005840;GO:0030529;GO:0016020;GO:0003723;GO:0003735;GO:0005829;GO:0045296;GO:0005737;GO:0070062;GO:0005515;GO:0006413;GO:0006364;GO:0000184;GO:0019083;GO:0006614;GO:0022625;GO:1902626	K02896-ko03010 Ribosome	KOG1722-60s ribosomal protein L24[J]
ENSG00000122545	1.30063	25.2358	-4.27818	2.79314e-236	9.9745e-235	down	2018-09-07	septin 7 [Source:HGNC Symbol;Acc:HGNC:1717]	GO:0005525;GO:0000166;GO:0005515;GO:0005694;GO:0051301;GO:0005737;GO:0005634;GO:0007049;GO:0030154;GO:0005856;GO:0031105;GO:0007283;GO:0042995;GO:0005819;GO:0030496;GO:0042802;GO:0000775;GO:0000776;GO:0000777;GO:0060271;GO:0005929;GO:0005829;GO:0045296;GO:0070062;GO:0051291;GO:0005930;GO:0016324;GO:0032154;GO:0005198;GO:0097227;GO:0000910;GO:0001725;GO:0016476;GO:0097730;GO:1902857;GO:0015630;GO:…	-	KOG2655-Septin family protein (P-loop GTPase)[DZU]
ENSG00000256514	1.79771	79.4166	-5.46521	3.01005e-236	1.07266e-234	down	AP003419.2	-	GO:0005739;GO:0005829;GO:0005730;GO:0005634;GO:0006260;GO:0003887;GO:0000731;GO:0006261;GO:0043625	-	-
ENSG00000137801	40.351	63.0881	-0.644763	3.62278e-235	1.28832e-233	-	THBS1	thrombospondin 1 [Source:HGNC Symbol;Acc:HGNC:11785]	GO:0005615;GO:0006954;GO:0008201;GO:0050840;GO:0016525;GO:0005737;GO:0071636;GO:0071363;GO:0071356;GO:0033574;GO:0009612;GO:0050431;GO:0005515;GO:0005576;GO:0007155;GO:0005509;GO:0005783;GO:0006986;GO:0070062;GO:0031012;GO:0016529;GO:0008284;GO:0009986;GO:0043066;GO:0030335;GO:0002576;GO:0000187;GO:0042535;GO:0009897;GO:0001948;GO:0031093;GO:0034976;GO:0030198;GO:0042327;GO:0043154;GO:0050921;GO:…	K16857-ko04015 Rap1 signaling pathway;ko04350 TGF-beta signaling pathway;ko04151 PI3K-Akt signaling pathway;ko04512 ECM-receptor interaction;ko04145 Phagosome;ko04115 p53 signaling pathway;ko04510 Focal adhesion;ko05206 MicroRNAs in cancer;ko05205 Proteoglycans in cancer;ko05219 Bladder cancer;ko05144 Malaria	-
ENSG00000105835	1.50104	15.7838	-3.39441	4.10794e-234	1.45781e-232	down	NAMPT	nicotinamide phosphoribosyltransferase [Source:HGNC Symbol;Acc:HGNC:30092]	GO:0005737;GO:0005634;GO:0048661;GO:0032922;GO:0014070;GO:0009435;GO:0007623;GO:0007565;GO:0047280;GO:0042803;GO:0008144;GO:0005125;GO:0048511;GO:0005576;GO:0005515;GO:0030054;GO:0016757;GO:0016740;GO:0016607;GO:0005615;GO:0019363;GO:0004514;GO:0005829;GO:0070062;GO:0045944;GO:0007165;GO:0007267;GO:0051770;GO:0008284;GO:0034356	K03462-ko00760 Nicotinate and nicotinamide metabolism	-
ENSG00000070404	21.1682	1.13994	4.21486	5.07776e-234	1.79823e-232	up	FSTL3	follistatin like 3 [Source:HGNC Symbol;Acc:HGNC:3973]	GO:0044306;GO:0030141;GO:0005794;GO:0005615;GO:0071248;GO:0030514;GO:0030325;GO:0030324;GO:0008584;GO:0007283;GO:0001822;GO:0048185;GO:0005576;GO:0005515;GO:0006355;GO:0006351;GO:0005654;GO:0005634;GO:0045944;GO:0044267;GO:0001968;GO:0006357;GO:0001503;GO:0045671;GO:0005788;GO:0043687;GO:0002244;GO:0022409;GO:0032926;GO:0090101	-	KOG3649-FOG: Kazal-type serine protease inhibitor domain[R]
ENSG00000111142	2.10733	39.0556	-4.21204	7.23925e-233	2.55837e-231	down	METAP2	methionyl aminopeptidase 2 [Source:HGNC Symbol;Acc:HGNC:16672]	GO:0006508;GO:0005737;GO:0004177;GO:0008233;GO:0005886;GO:0016787;GO:0005829;GO:0046872;GO:0003723;GO:0008235;GO:0070006;GO:0070084;GO:0022400;GO:0016485;GO:0018206;GO:0031365	-	KOG2775-Metallopeptidase[R]
ENSG00000102265	1589.68	1333.06	0.25399	1.78548e-232	6.29688e-231	-	TIMP1	TIMP metallopeptidase inhibitor 1 [Source:HGNC Symbol;Acc:HGNC:11820]	GO:0031012;GO:0005615;GO:0005604;GO:0005578;GO:0051216;GO:0043434;GO:0043066;GO:0042060;GO:0034097;GO:0010033;GO:0007568;GO:0001775;GO:0002020;GO:0005581;GO:0005576;GO:0005515;GO:0010951;GO:0008083;GO:0046872;GO:0005125;GO:0030414;GO:0010466;GO:0008191;GO:0070062;GO:0044267;GO:0008284;GO:0002576;GO:0031093;GO:0005788;GO:0022617;GO:2001044;GO:0004857;GO:0043086;GO:0043687;GO:0009725;GO:0051045;GO:…	K16451-ko04066 HIF-1 signaling pathway	KOG4745-Metalloproteinase inhibitor TIMP and related proteins[R]
ENSG00000172613	3.84491	45.7874	-3.57393	1.92996e-232	6.79235e-231	down	RAD9A	RAD9 checkpoint clamp component A [Source:HGNC Symbol;Acc:HGNC:9827]	GO:0005737;GO:0005634;GO:1902231;GO:0031573;GO:0005515;GO:0090305;GO:0006281;GO:0000077;GO:0016787;GO:0005654;GO:0004527;GO:0004518;GO:0006974;GO:0000075;GO:0030896;GO:0017124;GO:0019899;GO:1901796;GO:0006260;GO:0019901;GO:0042826;GO:0071479;GO:0008408;GO:0008853;GO:0000076	-	KOG2810-Checkpoint 9-1-1 complex, RAD9 component[DL]
ENSG00000092199	20.7935	98.1813	-2.23931	3.33041e-232	1.16969e-230	down	HNRNPC	heterogeneous nuclear ribonucleoprotein C (C1/C2) [Source:HGNC Symbol;Acc:HGNC:5035]	GO:0003676;GO:0005654;GO:0016070;GO:0005681;GO:0005515;GO:0005829;GO:0000790;GO:0030529;GO:0016020;GO:0005634;GO:0008380;GO:0006397;GO:0003723;GO:0042802;GO:0070062;GO:0000398;GO:0043234;GO:0003730;GO:0070034;GO:0005697;GO:0071013;GO:0001649;GO:0031492;GO:0000978;GO:0000980;GO:0043044;GO:0008266;GO:1990247;GO:0032211;GO:0070935;GO:0019013	K12884-ko03040 Spliceosome	KOG0118-FOG: RRM domain[R]
ENSG00000166801	0.201417	14.6755	-6.18708	6.18879e-231	2.16913e-229	down	FAM111A	family with sequence similarity 111 member A [Source:HGNC Symbol;Acc:HGNC:24725]	GO:0001650;GO:0005634;GO:0005737;GO:0006260;GO:0051607;GO:0005515;GO:0045071;GO:0016032;GO:0000785	-	-
ENSG00000106211	1594.77	1364.63	0.224845	6.88641e-231	2.40869e-229	-	HSPB1	heat shock protein family B (small) member 1 [Source:HGNC Symbol;Acc:HGNC:5246]	GO:0043292;GO:0030018;GO:0005886;GO:0005737;GO:0005634;GO:0005622;GO:2001234;GO:1902176;GO:0043122;GO:0042535;GO:0032731;GO:0006469;GO:0008426;GO:0005080;GO:0005515;GO:0042803;GO:1904115;GO:0003723;GO:0005615;GO:0005856;GO:0071901;GO:0005925;GO:0005819;GO:0042802;GO:0006986;GO:0005829;GO:0070062;GO:0001895;GO:0043488;GO:0009615;GO:0031012;GO:0043066;GO:0070527;GO:0048010;GO:0061077;GO:0019901;GO:…	K04455-ko04010 MAPK signaling pathway;ko04370 VEGF signaling pathway;ko05169 Epstein-Barr virus infection;ko05146 Amoebiasis	KOG3591-Alpha crystallins[O]
ENSG00000164111	16.1264	67.2511	-2.06013	5.61608e-229	1.96033e-227	down	ANXA5	annexin A5 [Source:HGNC Symbol;Acc:HGNC:543]	GO:0072563;GO:0009897;GO:0010033;GO:0043086;GO:0007165;GO:0005515;GO:0005509;GO:0016020;GO:0005737;GO:0005544;GO:0005925;GO:0005576;GO:0005829;GO:0070062;GO:0050819;GO:0043066;GO:0002576;GO:0007596;GO:0007599;GO:0005622;GO:0005543;GO:0004859	-	KOG0819-Annexin[U]
ENSG00000130520	493.13	298.651	0.723508	8.88374e-229	3.09459e-227	-	LSM4	LSM4 homolog, U6 small nuclear RNA and mRNA degradation associated [Source:HGNC Symbol;Acc:HGNC:17259]	GO:0043005;GO:0005634;GO:0042731;GO:0016020;GO:0005515;GO:0005829;GO:0043234;GO:0005681;GO:0030529;GO:0008380;GO:0006397;GO:0006396;GO:0003723;GO:0000398;GO:0000956;GO:0005654;GO:0033962;GO:0000932;GO:0043928;GO:0017070;GO:0000245;GO:0097526;GO:0000387;GO:0005688	K12623-ko03040 Spliceosome;ko03018 RNA degradation	KOG3293-Small nuclear ribonucleoprotein (snRNP)[A]
ENSG00000069275	101.3	161.954	-0.676953	7.40237e-228	2.57331e-226	-	NUCKS1	nuclear casein kinase and cyclin dependent kinase substrate 1 [Source:HGNC Symbol;Acc:HGNC:29923]	GO:0005737;GO:0005634;GO:0000785;GO:0046628;GO:0046626;GO:0045944;GO:0042593;GO:0006325;GO:0001678;GO:0003697;GO:0001077;GO:0006366;GO:0005730;GO:0003723;GO:0000790;GO:0008134;GO:0036297;GO:0043923;GO:0071481;GO:0000724;GO:0003690;GO:0003682;GO:0006275;GO:0006357;GO:0019046;GO:0031297;GO:0035822;GO:0044829;GO:0060382;GO:1990968;GO:1990969	-	-
ENSG00000109332	2.2339	18.8439	-3.07646	1.35825e-227	4.7121e-226	down	UBE2D3	ubiquitin conjugating enzyme E2 D3 [Source:HGNC Symbol;Acc:HGNC:12476]	GO:0005515;GO:0005886;GO:0016567;GO:0016740;GO:0005524;GO:0000166;GO:0016020;GO:0006915;GO:0006281;GO:0006974;GO:0005768;GO:0005829;GO:0070062;GO:0061631;GO:0061418;GO:0005654;GO:0010008;GO:0035666;GO:0004842;GO:0030509;GO:0006464;GO:0043161;GO:0070936;GO:0070979;GO:1903955;GO:0006511;GO:0000209;GO:0006513;GO:0051865;GO:0000122	K06689-ko04141 Protein processing in endoplasmic reticulum;ko04120 Ubiquitin mediated proteolysis;ko04013 MAPK signaling pathway - fly;ko04624 Toll and Imd signaling pathway	KOG0417-Ubiquitin-protein ligase[O]
ENSG00000170043	301.273	148.981	1.01594	8.70034e-227	3.01223e-225	up	TRAPPC1	trafficking protein particle complex 1 [Source:HGNC Symbol;Acc:HGNC:19894]	GO:0006810;GO:0030008;GO:0043547;GO:0005794;GO:0005783;GO:0005576;GO:0000139;GO:0016192;GO:0005829;GO:0017112;GO:0061024;GO:0043312;GO:0006888;GO:0035578;GO:0048208	-	KOG3368-Transport protein particle (TRAPP) complex subunit[U]
ENSG00000156261	22.4308	57.0505	-1.34676	5.20501e-225	1.79842e-223	down	CCT8	chaperonin containing TCP1 subunit 8 [Source:HGNC Symbol;Acc:HGNC:1623]	GO:0005524;GO:0044297;GO:0005832;GO:0002199;GO:1901998;GO:0046931;GO:0007339;GO:0045111;GO:0006457;GO:0005829;GO:0005654;GO:0000166;GO:0005737;GO:0005856;GO:0005874;GO:0051082;GO:0042995;GO:0005815;GO:0005576;GO:0061077;GO:0005929;GO:0045296;GO:0070062;GO:0043312;GO:0034774;GO:1904813;GO:0005515;GO:0035578;GO:0050821;GO:0032212;GO:0005813;GO:1904851;GO:1904874;GO:0044183;GO:0006458;GO:1904871;GO:…	-	KOG0362-Chaperonin complex component, TCP-1 theta subunit (CCT8)[O]
ENSG00000109501	19.0323	4.61773	2.04319	1.04464e-223	3.60212e-222	up	WFS1	wolframin ER transmembrane glycoprotein [Source:HGNC Symbol;Acc:HGNC:12762]	GO:0005515;GO:0005783;GO:0005789;GO:0016021;GO:0016020;GO:0055074;GO:0030433;GO:0044267;GO:0050821;GO:0051117;GO:0005788;GO:0036498;GO:0034976;GO:0031625;GO:0051247;GO:0007605;GO:0001822;GO:0000122;GO:0043524;GO:0043687;GO:0030425;GO:0003091;GO:0006983;GO:0007601;GO:0022417;GO:0031398;GO:0032469;GO:0042593;GO:0043069;GO:0043433;GO:0045927;GO:0050877;GO:0051928;GO:1903892;GO:2000675;GO:0030176;GO:…	K14020-ko04141 Protein processing in endoplasmic reticulum	-
ENSG00000164978	1.35199	50.0247	-5.20949	7.68582e-223	2.64485e-221	down	NUDT2	nudix hydrolase 2 [Source:HGNC Symbol;Acc:HGNC:8049]	GO:0034599;GO:0005515;GO:0016787;GO:0005525;GO:0000166;GO:0006915;GO:0005759;GO:0006139;GO:0004081;GO:0008796;GO:0008803;GO:0005739	K01518-ko00230 Purine metabolism;ko00240 Pyrimidine metabolism	KOG2839-Diadenosine and diphosphoinositol polyphosphate phosphohydrolase[T]
ENSG00000077147	0.773417	10.3275	-3.7391	1.18437e-222	4.06744e-221	down	TM9SF3	transmembrane 9 superfamily member 3 [Source:HGNC Symbol;Acc:HGNC:21529]	GO:0016021;GO:0016020	-	KOG1277-Endosomal membrane proteins, EMP70[U]
ENSG00000182481	10.2051	47.8101	-2.22802	2.99764e-222	1.0274e-220	down	KPNA2	karyopherin subunit alpha 2 [Source:HGNC Symbol;Acc:HGNC:6395]	GO:0005515;GO:0005654;GO:0005829;GO:0015031;GO:0008565;GO:0016020;GO:0005737;GO:0005634;GO:0006810;GO:0003723;GO:0006606;GO:0075733;GO:0019054;GO:0005643;GO:0016032;GO:0006259;GO:0006607;GO:0042826;GO:0000018;GO:0008139	K15043-ko05164 Influenza A	KOG0166-Karyopherin (importin) alpha[U]
ENSG00000112739	1.30724	17.8475	-3.77113	2.56443e-221	8.77159e-220	down	PRPF4B	pre-mRNA processing factor 4B [Source:HGNC Symbol;Acc:HGNC:17346]	GO:0005681;GO:0005515;GO:0016310;GO:0016301;GO:0016740;GO:0006468;GO:0005524;GO:0004674;GO:0000166;GO:0004672;GO:0016607;GO:0005634;GO:0008380;GO:0006397;GO:0003723;GO:0000398;GO:0071013;GO:0005694	-	KOG0670-U4/U6-associated splicing factor PRP4[A]
ENSG00000198918	484.107	1003.05	-1.051	1.88597e-220	6.43801e-219	down	RPL39	ribosomal protein L39 [Source:HGNC Symbol;Acc:HGNC:10350]	GO:0022625;GO:0061844;GO:0005840;GO:0006412;GO:0003735;GO:0005622;GO:0030529;GO:0003723;GO:0005615;GO:0005829;GO:0002227;GO:0019731;GO:0050830;GO:0006413;GO:0006364;GO:0000184;GO:0019083;GO:0006614	K02924-ko03010 Ribosome	KOG0002-60s ribosomal protein L39[J]
ENSG00000082898	3.41507	22.1208	-2.69542	3.37236e-220	1.1489e-218	down	XPO1	exportin 1 [Source:HGNC Symbol;Acc:HGNC:12825]	GO:0005634;GO:0046825;GO:0042493;GO:0042176;GO:0034504;GO:0010824;GO:0006611;GO:0000122;GO:0019904;GO:0008565;GO:0005515;GO:0031965;GO:0005829;GO:0043231;GO:0015031;GO:0006886;GO:0016020;GO:0005737;GO:0051028;GO:0006810;GO:0003723;GO:0008536;GO:0005654;GO:0005730;GO:0000776;GO:0075733;GO:0043488;GO:0016032;GO:0007062;GO:0005635;GO:0005049;GO:0005215;GO:0005487;GO:0000054;GO:0000055;GO:0000056;GO:…	K14290-ko03013 RNA transport;ko03008 Ribosome biogenesis in eukaryotes;ko04013 MAPK signaling pathway - fly;ko05166 HTLV-I infection;ko05164 Influenza A;ko05169 Epstein-Barr virus infection	KOG2020-Nuclear transport receptor CRM1/MSN5 (importin beta superfamily)[YU]
ENSG00000197728	635.04	467.768	0.441055	1.10322e-218	3.75093e-217	-	RPS26	ribosomal protein S26 [Source:HGNC Symbol;Acc:HGNC:10414]	GO:0005515;GO:0005840;GO:0006412;GO:0003735;GO:0005622;GO:0030529;GO:0016020;GO:0003723;GO:0022627;GO:0003729;GO:0005829;GO:0045296;GO:0070062;GO:0005654;GO:0006413;GO:0006364;GO:0000184;GO:0019083;GO:0006614;GO:0033119;GO:0015935	K02976-ko03010 Ribosome	KOG1768-40s ribosomal protein S26[J]
ENSG00000131238	7.63689	38.1292	-2.31984	3.40583e-218	1.15567e-216	down	PPT1	palmitoyl-protein thioesterase 1 [Source:HGNC Symbol;Acc:HGNC:9325]	GO:0008474;GO:0098599;GO:0002084;GO:0046949;GO:0005576;GO:0005829;GO:0016042;GO:0005794;GO:0016787;GO:0015031;GO:0016020;GO:0005634;GO:0007399;GO:0045121;GO:0005764;GO:0050896;GO:0005515;GO:0030424;GO:0070062;GO:0007601;GO:0043524;GO:0016290;GO:0043066;GO:0030308;GO:0048260;GO:0007420;GO:0043202;GO:0008021;GO:0030163;GO:0031579;GO:0048666;GO:0007042;GO:0030149;GO:0050803;GO:0006898;GO:0006907;GO:…	K01074-ko01212 Fatty acid metabolism;ko00062 Fatty acid elongation;ko04142 Lysosome	KOG2541-Palmitoyl protein thioesterase[IO]
ENSG00000004779	17.1738	133.739	-2.96113	4.21504e-218	1.42742e-216	down	NDUFAB1	NADH:ubiquinone oxidoreductase subunit AB1 [Source:HGNC Symbol;Acc:HGNC:7694]	GO:0034641;GO:0006633;GO:0005739;GO:0006631;GO:0006629;GO:0055114;GO:0005654;GO:0005759;GO:0070469;GO:0009249;GO:0005509;GO:0031966;GO:0005515;GO:0005829;GO:0008137;GO:0006120;GO:0032981;GO:0005747;GO:0005743;GO:0000035;GO:0000036;GO:0005504;GO:0031177;GO:0006635;GO:0009245	K03955-ko00190 Oxidative phosphorylation;ko05010 Alzheimer's disease;ko05012 Parkinson's disease;ko05016 Huntington's disease;ko04932 Non-alcoholic fatty liver disease (NAFLD)	KOG1748-Acyl carrier protein/NADH-ubiquinone oxidoreductase, NDUFAB1/SDAP subunit[CIQ]
ENSG00000156502	20.8415	1.58064	3.72088	2.00971e-217	6.79235e-216	up	SUPV3L1	Suv3 like RNA helicase [Source:HGNC Symbol;Acc:HGNC:11471]	GO:0005739;GO:0016817;GO:0005515;GO:0042803;GO:0003677;GO:0004386;GO:0016787;GO:0005524;GO:0000166;GO:0005634;GO:0003723;GO:0005759;GO:0006310;GO:0043066;GO:0042645;GO:0030307;GO:0004004;GO:0006401;GO:0003725;GO:0003678;GO:0070584;GO:0034458;GO:0000958;GO:0000962;GO:0000965;GO:0032508;GO:0035945;GO:0035946;GO:0070827;GO:2000827;GO:0045025	-	KOG0953-Mitochondrial RNA helicase SUV3, DEAD-box superfamily[A]
ENSG00000114942	242.179	571.399	-1.23843	4.10821e-217	1.38573e-215	down	EEF1B2	eukaryotic translation elongation factor 1 beta 2 [Source:HGNC Symbol;Acc:HGNC:3208]	GO:0005515;GO:0005783;GO:0006412;GO:0005737;GO:0003746;GO:0006414;GO:0005853;GO:0005829;GO:0045471	-	KOG1668-Elongation factor 1 beta/delta chain[K]
ENSG00000113407	21.7629	31.2951	-0.524067	2.59378e-216	8.73171e-215	-	TARS	threonyl-tRNA synthetase [Source:HGNC Symbol;Acc:HGNC:11572]	GO:0005515;GO:0016874;GO:0015629;GO:0042803;GO:0005829;GO:0005524;GO:0000166;GO:0006412;GO:0005737;GO:0004812;GO:0006418;GO:0016876;GO:0043039;GO:0070062;GO:0004829;GO:0006435	K01868-ko00970 Aminoacyl-tRNA biosynthesis	KOG1637-Threonyl-tRNA synthetase[J]
ENSG00000104852	107.822	275.626	-1.35407	1.52275e-215	5.1161e-214	down	SNRNP70	small nuclear ribonucleoprotein U1 subunit 70 [Source:HGNC Symbol;Acc:HGNC:11150]	GO:0005685;GO:0005515;GO:0005681;GO:0030619;GO:0030529;GO:0005654;GO:0005634;GO:0016607;GO:0006397;GO:0003723;GO:0003676;GO:0003729;GO:0043484;GO:0000398;GO:0008380;GO:0071011;GO:0071004;GO:0043462;GO:0061084;GO:1904715;GO:0000243;GO:0005737;GO:0071560;GO:0071356;GO:0071300;GO:0048026;GO:1990446;GO:0019013	K11093-ko03040 Spliceosome	KOG0113-U1 small nuclear ribonucleoprotein (RRM superfamily)[A]
ENSG00000116161	1.01302	22.0838	-4.44625	2.30394e-215	7.72546e-214	down	CACYBP	calcyclin binding protein [Source:HGNC Symbol;Acc:HGNC:30423]	GO:0042803;GO:0005654;GO:0005829;GO:0005737;GO:0005634;GO:0005515;GO:0070062;GO:0030877;GO:0044297;GO:0043005;GO:0019005;GO:0005641;GO:0071277;GO:0060548;GO:0060416;GO:0055007;GO:0045740;GO:0007568;GO:0007507;GO:0031625;GO:0019904	K04507-ko04310 Wnt signaling pathway	KOG3260-Calcyclin-binding protein CacyBP[T]
ENSG00000108518	1718.65	1559.49	0.140199	1.64282e-214	5.49778e-213	-	PFN1	profilin 1 [Source:HGNC Symbol;Acc:HGNC:8881]	GO:0005737;GO:0005634;GO:0005615;GO:0006357;GO:0001843;GO:0017048;GO:0005515;GO:0030036;GO:0003779;GO:0016020;GO:0003723;GO:0005856;GO:0005925;GO:0005829;GO:0045296;GO:0070062;GO:0005938;GO:0072562;GO:0060071;GO:0050821;GO:0005546;GO:0070064;GO:0030838;GO:0010634;GO:0032781;GO:0003785;GO:0051497;GO:0030837;GO:0000774;GO:0032232;GO:0032233;GO:1900029	K05759-ko04015 Rap1 signaling pathway;ko04013 MAPK signaling pathway - fly;ko04810 Regulation of actin cytoskeleton;ko05132 Salmonella infection;ko05131 Shigellosis	KOG1755-Profilin[Z]
ENSG00000242114	61.2479	149.7	-1.28934	2.7822e-214	9.29254e-213	down	MTFP1	mitochondrial fission process 1 [Source:HGNC Symbol;Acc:HGNC:26945]	GO:0005739;GO:0005743;GO:0016021;GO:0016020;GO:0006915;GO:0000266	-	KOG3945-Uncharacterized conserved protein[S]
ENSG00000104936	14.0931	60.683	-2.1063	3.25759e-214	1.08591e-212	down	DMPK	dystrophia myotonica protein kinase [Source:HGNC Symbol;Acc:HGNC:2933]	GO:0005515;GO:0050790;GO:0005886;GO:0005739;GO:0005829;GO:0016310;GO:0016301;GO:0005789;GO:0005783;GO:0016740;GO:0006468;GO:0005524;GO:0004674;GO:0000166;GO:0004672;GO:0046872;GO:0016021;GO:0016020;GO:0005737;GO:0005634;GO:0005741;GO:0031966;GO:0016529;GO:0018105;GO:0031965;GO:1903779;GO:0033017;GO:0006998;GO:0006874;GO:0008016;GO:0005640;GO:0031307;GO:0010830;GO:0017020;GO:0010657;GO:0014722;GO:…	-	-
ENSG00000072849	5.49429	79.4933	-3.85483	3.61649e-214	1.20319e-212	down	DERL2	derlin 2 [Source:HGNC Symbol;Acc:HGNC:17943]	GO:0005783;GO:0005770;GO:0005769;GO:0030970;GO:0001967;GO:0048500;GO:0005785;GO:0004252;GO:0005515;GO:0005789;GO:0016021;GO:0016020;GO:0044322;GO:0006986;GO:0008284;GO:0030433;GO:0030176;GO:1904380;GO:0030307;GO:0030968;GO:1904153;GO:0006508	K13989-ko04141 Protein processing in endoplasmic reticulum	KOG0858-Predicted membrane protein[S]
ENSG00000196504	1.43807	9.84783	-2.77567	1.2554e-213	4.1685e-212	down	PRPF40A	pre-mRNA processing factor 40 homolog A [Source:HGNC Symbol;Acc:HGNC:16463]	GO:0016363;GO:0005634;GO:0070064;GO:0005515;GO:0051301;GO:0005829;GO:0016020;GO:0016607;GO:0008380;GO:0006397;GO:0003723;GO:0007049;GO:0007010;GO:0005654;GO:0000398;GO:0008360;GO:0016477;GO:0032465;GO:0005685;GO:0071004	-	-
ENSG00000165733	7.35416	22.5266	-1.615	5.26148e-213	1.74366e-211	down	BMS1	BMS1, ribosome biogenesis factor [Source:HGNC Symbol;Acc:HGNC:23505]	GO:0005730;GO:0005634;GO:0005524;GO:0000166;GO:0003723;GO:0042254;GO:0000462;GO:0005654;GO:0003924;GO:0006364;GO:0030686;GO:0034511;GO:0042255;GO:0005525;GO:0000479	K14569-ko03008 Ribosome biogenesis in eukaryotes	KOG1951-GTP-binding protein AARP2 involved in 40S ribosome biogenesis[J]
ENSG00000162704	1.95248	27.8115	-3.8323	6.1338e-212	2.0288e-210	down	ARPC5	actin related protein 2/3 complex subunit 5 [Source:HGNC Symbol;Acc:HGNC:708]	GO:0015629;GO:0003779;GO:0005737;GO:0005856;GO:0030833;GO:0034314;GO:0005885;GO:0005925;GO:0042995;GO:0038096;GO:0005576;GO:0005515;GO:0005829;GO:0070062;GO:0061024;GO:0043312;GO:0034774;GO:1904813;GO:0005200;GO:0006928;GO:0048013;GO:0030036;GO:0051015;GO:0016477;GO:0043005;GO:0030426;GO:0030027;GO:0005768;GO:0097581;GO:0061842;GO:0051639;GO:0030011;GO:0021769;GO:0014909	K05754-ko04144 Endocytosis;ko04810 Regulation of actin cytoskeleton;ko04666 Fc gamma R-mediated phagocytosis;ko05130 Pathogenic Escherichia coli infection;ko05132 Salmonella infection;ko05131 Shigellosis;ko05100 Bacterial invasion of epithelial cells	KOG3380-Actin-related protein Arp2/3 complex, subunit ARPC5[Z]
ENSG00000181026	10.9124	1.63909	2.73501	1.57034e-211	5.18396e-210	up	AEN	apoptosis enhancing nuclease [Source:HGNC Symbol;Acc:HGNC:25722]	GO:0005515;GO:0090305;GO:0031965;GO:0016787;GO:0005730;GO:0005634;GO:0003676;GO:0006915;GO:0004527;GO:0004518;GO:0006974;GO:0005654;GO:0042771;GO:0010212	-	KOG2249-3'-5' exonuclease[L]
ENSG00000162231	30.5581	34.194	-0.162187	1.5753e-211	5.19028e-210	-	NXF1	nuclear RNA export factor 1 [Source:HGNC Symbol;Acc:HGNC:8071]	GO:0051028;GO:0005515;GO:0005622;GO:0005654;GO:0006810;GO:0016607;GO:0005737;GO:0005634;GO:0003723;GO:0003676;GO:0006406;GO:0005829;GO:0016032;GO:0006405;GO:0000346;GO:0003727;GO:0016973;GO:0042405;GO:0005643;GO:0005487;GO:0003729	K14284-ko03013 RNA transport;ko03015 mRNA surveillance pathway;ko03008 Ribosome biogenesis in eukaryotes;ko05164 Influenza A;ko05168 Herpes simplex infection	KOG3763-mRNA export factor TAP/MEX67[A]
ENSG00000214026	493.33	837.229	-0.763069	2.35565e-211	7.74636e-210	-	MRPL23	mitochondrial ribosomal protein L23 [Source:HGNC Symbol;Acc:HGNC:10322]	GO:0005840;GO:0006412;GO:0003735;GO:0005622;GO:0005515;GO:0005739;GO:0001650;GO:0030529;GO:0032543;GO:0003723;GO:0005743;GO:0070125;GO:0070126;GO:0005762	K02892-ko03010 Ribosome	KOG4089-Predicted mitochondrial ribosomal protein L23[J]
ENSG00000167522	14.2334	27.0968	-0.928841	2.40429e-211	7.89109e-210	-	ANKRD11	ankyrin repeat domain 11 [Source:HGNC Symbol;Acc:HGNC:21316]	GO:0005886;GO:0005654;GO:0005829;GO:0005634;GO:0042475;GO:0048705;GO:0060325;GO:0060348;GO:0060323;GO:0035264;GO:0001894;GO:0001701	-	-
ENSG00000134030	8.0055	0.250531	4.99793	7.70026e-211	2.52243e-209	up	CTIF	cap binding complex dependent translation initiation factor [Source:HGNC Symbol;Acc:HGNC:23925]	GO:0005829;GO:0006446;GO:0005737;GO:0003723;GO:0048471;GO:0005515;GO:0006417;GO:0000184	-	KOG3942-MIF4G domain-containing protein[J]
ENSG00000108298	993.151	781.098	0.346509	8.9813e-211	2.93642e-209	-	RPL19	ribosomal protein L19 [Source:HGNC Symbol;Acc:HGNC:10312]	GO:0022625;GO:0097421;GO:1990932;GO:0070180;GO:0003735;GO:0005515;GO:0005840;GO:0006412;GO:0005622;GO:0030529;GO:0016020;GO:0003723;GO:0005925;GO:0005829;GO:0006413;GO:0006364;GO:0000184;GO:0019083;GO:0006614	K02885-ko03010 Ribosome	KOG1696-60s ribosomal protein L19[J]
ENSG00000179271	841.219	707.641	0.249464	2.05612e-210	6.70957e-209	-	GADD45GIP1	GADD45G interacting protein 1 [Source:HGNC Symbol;Acc:HGNC:29996]	GO:0005761;GO:0005739;GO:1903862;GO:0008284;GO:0005515;GO:0005840;GO:0030529;GO:0005634;GO:0007049;GO:0005759;GO:0016032;GO:0070125;GO:0070126;GO:0071850	-	KOG4848-Extracellular matrix-associated peroxidase[WV]
ENSG00000125107	17.3816	23.8742	-0.457893	2.2893e-210	7.45619e-209	-	CNOT1	CCR4-NOT transcription complex subunit 1 [Source:HGNC Symbol;Acc:HGNC:7877]	GO:0005515;GO:0006355;GO:0006351;GO:0005829;GO:0016020;GO:0005737;GO:0005634;GO:0003723;GO:0007275;GO:0005615;GO:0010606;GO:0000932;GO:0000122;GO:0004535;GO:0019904;GO:0030331;GO:0032947;GO:0042974;GO:0070016;GO:0000289;GO:0006417;GO:0006977;GO:0017148;GO:0031047;GO:0033147;GO:0035195;GO:0048387;GO:0060213;GO:0061014;GO:0090503;GO:1900153;GO:2000036;GO:0030014;GO:0030015	K12604-ko03018 RNA degradation	KOG1831-Negative regulator of transcription[K]
ENSG00000135829	0.873377	15.3178	-4.13246	3.70592e-209	1.20471e-207	down	DHX9	DExH-box helicase 9 [Source:HGNC Symbol;Acc:HGNC:2750]	GO:0048511;GO:0005515;GO:0030529;GO:0003677;GO:0032508;GO:0008026;GO:0004386;GO:0016787;GO:0005654;GO:0005730;GO:0005634;GO:0005524;GO:0000166;GO:0016020;GO:0005737;GO:0003723;GO:0003676;GO:0005813;GO:0005829;GO:0001085;GO:0004004;GO:1903608;GO:0036464;GO:0004003;GO:0032481;GO:0000398;GO:0003724;GO:0001649;GO:0070934;GO:0070937;GO:0006396;GO:0097165	-	KOG0920-ATP-dependent RNA helicase A[A]
ENSG00000134318	0.670717	12.326	-4.19986	3.74748e-209	1.2159e-207	down	ROCK2	Rho associated coiled-coil containing protein kinase 2 [Source:HGNC Symbol;Acc:HGNC:10252]	GO:0048511;GO:0030036;GO:0005886;GO:0035556;GO:0016310;GO:0016301;GO:0016740;GO:0005829;GO:0006468;GO:0005524;GO:0004674;GO:0000166;GO:0004672;GO:0046872;GO:0016020;GO:0005737;GO:0005634;GO:0003723;GO:0005856;GO:0005813;GO:0005815;GO:0032956;GO:0006939;GO:0007266;GO:0017048;GO:0005515;GO:2000114;GO:0001934;GO:0010628;GO:0010825;GO:0048013;GO:0048010;GO:0005198;GO:0016525;GO:0030155;GO:0036464;GO:…	K17388-ko04310 Wnt signaling pathway;ko04071 Sphingolipid signaling pathway;ko04024 cAMP signaling pathway;ko04022 cGMP - PKG signaling pathway;ko04810 Regulation of actin cytoskeleton;ko04510 Focal adhesion;ko04611 Platelet activation;ko04670 Leukocyte transendothelial migration;ko04062 Chemokine signaling pathway;ko04921 Oxytocin signaling pathway;ko04270 Vascular smooth muscle contraction;ko04…	KOG0612-Rho-associated, coiled-coil containing protein kinase[T]
ENSG00000154222	1.94402	17.8185	-3.19626	4.77991e-209	1.54793e-207	down	CC2D1B	coiled-coil and C2 domain containing 1B [Source:HGNC Symbol;Acc:HGNC:29386]	GO:0005634;GO:0000122;GO:0001078;GO:0000978;GO:0005515;GO:0006355;GO:0006351;GO:0005654;GO:0043231;GO:0000981	-	KOG3837-Uncharacterized conserved protein, contains DM14 and C2 domains[R]
ENSG00000143153	7.43615	40.2863	-2.43766	1.21585e-208	3.92994e-207	down	ATP1B1	ATPase Na+/K+ transporting subunit beta 1 [Source:HGNC Symbol;Acc:HGNC:804]	GO:0043209;GO:0042383;GO:0016324;GO:0016323;GO:0014704;GO:0005901;GO:0005890;GO:0005886;GO:1903281;GO:1903169;GO:0060048;GO:0050821;GO:0055119;GO:0030001;GO:0010882;GO:0010468;GO:0006874;GO:0006814;GO:0001666;GO:0006813;GO:0019901;GO:0008022;GO:0005391;GO:0005515;GO:0006811;GO:0007155;GO:0005622;GO:0016021;GO:0016020;GO:0006810;GO:0050900;GO:0010248;GO:0070062;GO:0034220;GO:1903278;GO:1903779;GO:…	K01540-ko04024 cAMP signaling pathway;ko04022 cGMP - PKG signaling pathway;ko04911 Insulin secretion;ko04918 Thyroid hormone synthesis;ko04919 Thyroid hormone signaling pathway;ko04260 Cardiac muscle contraction;ko04261 Adrenergic signaling in cardiomyocytes;ko04970 Salivary secretion;ko04971 Gastric acid secretion;ko04972 Pancreatic secretion;ko04976 Bile secretion;ko04973 Carbohydrate digestion…	KOG3927-Na+/K+ ATPase, beta subunit[P]
ENSG00000101367	6.41524	35.2991	-2.46006	1.41792e-208	4.57439e-207	down	MAPRE1	microtubule associated protein RP/EB family member 1 [Source:HGNC Symbol;Acc:HGNC:6890]	GO:0042995;GO:0035371;GO:0031253;GO:0015630;GO:0005881;GO:0005874;GO:0005794;GO:1903033;GO:0035372;GO:0051010;GO:0005515;GO:0051301;GO:0005737;GO:0003723;GO:0008017;GO:0007049;GO:0005856;GO:0005813;GO:0005815;GO:0005819;GO:0042802;GO:0005829;GO:0045296;GO:0000086;GO:0097711;GO:0007062;GO:0008283;GO:0008022;GO:0031115;GO:0030335;GO:1904527;GO:0030981	-	KOG3000-Microtubule-binding protein involved in cell cycle control[DZ]
ENSG00000100300	479.568	488.533	-0.0267203	1.5992e-208	5.14948e-207	-	TSPO	translocator protein [Source:HGNC Symbol;Acc:HGNC:1158]	GO:0005515;GO:0005739;GO:0016021;GO:0016020;GO:0006810;GO:0006869;GO:0007165;GO:0031966;GO:0070062;GO:0005741;GO:0006626;GO:0006700;GO:0008503;GO:0015485;GO:0006783;GO:0006820;GO:0006915;GO:0008202;GO:0008283;GO:0032374;GO:0017127;GO:2000379;GO:1903579;GO:1903147;GO:0072656;GO:0072655;GO:0071476;GO:0071294;GO:0071222;GO:0060253;GO:0060252;GO:0060242;GO:0051928;GO:0051901;GO:0050810;GO:0048678;GO:…	K05770-ko04080 Neuroactive ligand-receptor interaction;ko04214 Apoptosis - fly;ko05166 HTLV-I infection	KOG3797-Peripheral-type benzodiazepine receptor and related proteins[T]
ENSG00000116096	37.8562	3.87528	3.28816	2.76847e-208	8.89777e-207	up	SPR	sepiapterin reductase (7,8-dihydrobiopterin:NADP+ oxidoreductase) [Source:HGNC Symbol;Acc:HGNC:11257]	GO:0055114;GO:0016491;GO:0005654;GO:0005829;GO:0005737;GO:0070062;GO:0006729;GO:0050999;GO:0004033;GO:0050661;GO:0006809;GO:0004757	K00072-ko00790 Folate biosynthesis	KOG1204-Predicted dehydrogenase[Q]
ENSG00000135404	788.439	744.449	0.0828255	6.41324e-208	2.05731e-206	-	CD63	CD63 molecule [Source:HGNC Symbol;Acc:HGNC:1692]	GO:0016021;GO:0016020;GO:0042470;GO:0005576;GO:0005515;GO:0005886;GO:0005765;GO:0015031;GO:0006810;GO:0005615;GO:0005764;GO:0005768;GO:0031902;GO:0070062;GO:0010008;GO:0005887;GO:0043312;GO:0002576;GO:0031088;GO:0032585;GO:0009986;GO:0031226;GO:0016477;GO:0035577;GO:1900746;GO:0007160;GO:0005771;GO:0002092;GO:0034613;GO:0035646;GO:0048757;GO:2000680;GO:2001046;GO:0031904;GO:0097487	K06497-ko04142 Lysosome;ko05205 Proteoglycans in cancer	KOG3882-Tetraspanin family integral membrane protein[R]
ENSG00000243927	0.370889	48.2909	-7.02462	6.77435e-208	2.16907e-206	down	MRPS6	mitochondrial ribosomal protein S6 [Source:HGNC Symbol;Acc:HGNC:14051]	GO:0005739;GO:0005515;GO:0005840;GO:0006412;GO:0003735;GO:0030529;GO:0019843;GO:0032543;GO:0005763;GO:0005743;GO:0070125;GO:0070126;GO:0015935;GO:0070181	K02990-ko03010 Ribosome	KOG4708-Mitochondrial ribosomal protein MRP17[J]
ENSG00000198604	0.139805	10.5377	-6.23599	5.68937e-207	1.81825e-205	down	BAZ1A	bromodomain adjacent to zinc finger domain 1A [Source:HGNC Symbol;Acc:HGNC:960]	GO:0005515;GO:0006355;GO:0006351;GO:0046872;GO:0008270;GO:0005634;GO:0006338;GO:0006261;GO:0008623;GO:0016590	-	KOG1245-Chromatin remodeling complex WSTF-ISWI, large subunit (contains heterochromatin localization, PHD and BROMO domains)[B]
ENSG00000213585	11.1759	49.2985	-2.14115	8.01657e-207	2.5572e-205	down	VDAC1	voltage dependent anion channel 1 [Source:HGNC Symbol;Acc:HGNC:12669]	GO:0005515;GO:0005886;GO:0006811;GO:0005739;GO:0005741;GO:1903959;GO:0006820;GO:0008308;GO:0055085;GO:0016021;GO:0016020;GO:0005634;GO:0006810;GO:0006915;GO:0045121;GO:0070062;GO:0044325;GO:0098656;GO:0016032;GO:1903146;GO:0030855;GO:0042645;GO:0015288;GO:0016236;GO:0019901;GO:0046930;GO:0043234;GO:0043209;GO:0008021;GO:0005743;GO:2000378;GO:0007612;GO:0007270;GO:0007268;GO:0006851;GO:0001662;GO:…	K05862-ko04020 Calcium signaling pathway;ko04022 cGMP - PKG signaling pathway;ko05012 Parkinson's disease;ko05016 Huntington's disease;ko05166 HTLV-I infection;ko05164 Influenza A	KOG3126-Porin/voltage-dependent anion-selective channel protein[P]
ENSG00000173812	84.9127	24.5854	1.78818	1.22781e-206	3.90925e-205	up	EIF1	eukaryotic translation initiation factor 1 [Source:HGNC Symbol;Acc:HGNC:3249]	GO:0006413;GO:0003743;GO:0009048;GO:0006412;GO:0005737;GO:0005634;GO:0003723;GO:0008135;GO:0006950;GO:0006446	K03113-ko03013 RNA transport	KOG1770-Translation initiation factor 1 (eIF-1/SUI1)[J]
ENSG00000104880	1.93079	12.1391	-2.6524	1.25183e-206	3.9783e-205	down	ARHGEF18	Rho/Rac guanine nucleotide exchange factor 18 [Source:HGNC Symbol;Acc:HGNC:17090]	GO:0043547;GO:0035023;GO:0005089;GO:0005886;GO:0005829;GO:0016020;GO:0005737;GO:0005856;GO:0005085;GO:0070062;GO:0051056;GO:0016324;GO:0043065;GO:0007179;GO:0030054;GO:0030036;GO:0045177;GO:0007264;GO:0008360	-	-
ENSG00000104812	1.5662	19.4974	-3.63794	2.53357e-206	8.03664e-205	down	GYS1	glycogen synthase 1 [Source:HGNC Symbol;Acc:HGNC:4706]	GO:0016234;GO:0005737;GO:0007507;GO:0005978;GO:0005977;GO:0005536;GO:0004373;GO:0008152;GO:0003824;GO:0005515;GO:0016757;GO:0016740;GO:0016020;GO:0005829;GO:0019901;GO:0061547	K00693-ko00500 Starch and sucrose metabolism;ko04151 PI3K-Akt signaling pathway;ko04152 AMPK signaling pathway;ko04910 Insulin signaling pathway;ko04922 Glucagon signaling pathway;ko04931 Insulin resistance	KOG3742-Glycogen synthase[G]
ENSG00000122705	160.222	333.797	-1.0589	3.0393e-205	9.62295e-204	down	CLTA	clathrin light chain A [Source:HGNC Symbol;Acc:HGNC:2090]	GO:0030118;GO:0048268;GO:0032802;GO:0034383;GO:0005515;GO:0005198;GO:0051301;GO:0016192;GO:0006886;GO:0016020;GO:0005737;GO:0007049;GO:0005856;GO:0005905;GO:0030130;GO:0030132;GO:0030659;GO:0031410;GO:0005819;GO:0005886;GO:0003674;GO:0005829;GO:0061024;GO:0007018;GO:0019886;GO:0032588;GO:0036020;GO:0032050;GO:0072583;GO:0030125;GO:0071439;GO:0030672;GO:0030136;GO:0006897;GO:0051020;GO:0042277	K04644-ko04144 Endocytosis;ko04142 Lysosome;ko04961 Endocrine and other factor-regulated calcium reabsorption;ko04721 Synaptic vesicle cycle;ko05016 Huntington's disease;ko05100 Bacterial invasion of epithelial cells	KOG4031-Vesicle coat protein clathrin, light chain[U]
ENSG00000102024	1.27355	19.1018	-3.90678	7.61976e-205	2.40807e-203	down	PLS3	plastin 3 [Source:HGNC Symbol;Acc:HGNC:9091]	GO:0005886;GO:0005829;GO:0003779;GO:0005509;GO:0046872;GO:0005737;GO:0060348;GO:0051015;GO:0051017;GO:0051639;GO:0005884;GO:0051764;GO:0032432	-	KOG0046-Ca2+-binding actin-bundling protein (fimbrin/plastin), EF-Hand protein superfamily[Z]
ENSG00000128050	2.78202	11.6965	-2.07187	8.00198e-205	2.52418e-203	down	PAICS	phosphoribosylaminoimidazole carboxylase and phosphoribosylaminoimidazolesuccinocarboxamide synthase [Source:HGNC Symbol;Acc:HGNC:8587]	GO:0006164;GO:0004639;GO:0006189;GO:0016831;GO:0008152;GO:0003824;GO:0005515;GO:0016874;GO:0016829;GO:0005524;GO:0000166;GO:0016020;GO:0042802;GO:0005829;GO:0045296;GO:0005737;GO:0070062;GO:0009168;GO:0004638;GO:0009113	K01587-ko00230 Purine metabolism	KOG2835-Phosphoribosylamidoimidazole-succinocarboxamide synthase[F]
ENSG00000130748	1026.08	749.515	0.453118	3.51771e-204	1.10759e-202	-	TMEM160	transmembrane protein 160 [Source:HGNC Symbol;Acc:HGNC:26042]	GO:0005739;GO:0016021;GO:0016020	-	-
ENSG00000095139	0.546962	13.4073	-4.61543	1.22388e-203	3.8464e-202	down	ARCN1	archain 1 [Source:HGNC Symbol;Acc:HGNC:649]	GO:0005794;GO:0015031;GO:0006810;GO:0016020;GO:0005737;GO:0000139;GO:0006890;GO:0031410;GO:0016192;GO:0030126;GO:0030663;GO:0030137;GO:0005783;GO:0048193;GO:0043473;GO:0021691;GO:0008344;GO:0003723;GO:0005829;GO:0005789;GO:0006886;GO:0006888;GO:0030133	-	KOG2635-Medium subunit of clathrin adaptor complex[U]
ENSG00000065978	20.5894	81.6469	-1.9875	1.57787e-203	4.9498e-202	down	YBX1	Y-box binding protein 1 [Source:HGNC Symbol;Acc:HGNC:8014]	GO:0071204;GO:0005737;GO:0005634;GO:0051154;GO:0001701;GO:0000122;GO:0003697;GO:0003682;GO:0005576;GO:0005515;GO:0030529;GO:0006355;GO:0006351;GO:0003677;GO:0031965;GO:0005829;GO:0043231;GO:0008380;GO:0006397;GO:0003723;GO:0003676;GO:0000978;GO:0070062;GO:0005654;GO:0010494;GO:0006366;GO:0003700;GO:1903608;GO:0001077;GO:0045944;GO:0051781;GO:0000398;GO:0070934;GO:0070937;GO:0005689;GO:0051020;GO:…	-	KOG3070-Predicted RNA-binding protein containing PIN domain and invovled in translation or RNA processing[J]
ENSG00000119922	1.62407	20.2051	-3.63704	9.7783e-203	3.06183e-201	down	IFIT2	interferon induced protein with tetratricopeptide repeats 2 [Source:HGNC Symbol;Acc:HGNC:5409]	GO:0005515;GO:0005783;GO:0005737;GO:0003723;GO:0006915;GO:0002376;GO:0045087;GO:0051607;GO:0035457;GO:0005829;GO:0009615;GO:0043065;GO:0032091;GO:0060337;GO:0008637	-	KOG1124-FOG: TPR repeat[R]
ENSG00000262814	720.735	537.75	0.422534	3.01098e-202	9.41083e-201	-	MRPL12	mitochondrial ribosomal protein L12 [Source:HGNC Symbol;Acc:HGNC:10378]	GO:0005739;GO:0005840;GO:0006412;GO:0003735;GO:0005622;GO:0030529;GO:0005515;GO:0006390;GO:0003723;GO:0005743;GO:0045893;GO:0070125;GO:0070126;GO:0005762	K02935-ko03010 Ribosome	KOG1715-Mitochondrial/chloroplast ribosomal protein L12[J]
ENSG00000196235	197.971	261.378	-0.400847	7.27671e-202	2.27017e-200	-	SUPT5H	SPT5 homolog, DSIF elongation factor subunit [Source:HGNC Symbol;Acc:HGNC:11469]	GO:0045944;GO:0003682;GO:0005515;GO:0006355;GO:0006351;GO:0006357;GO:0005654;GO:0005634;GO:0003723;GO:0007049;GO:0006368;GO:0032784;GO:0000122;GO:0019899;GO:0046982;GO:0006338;GO:0006354;GO:0006366;GO:0006370;GO:0010033;GO:0016239;GO:0032785;GO:0032786;GO:0039692;GO:0050434;GO:1900364;GO:0032044	-	KOG1999-RNA polymerase II transcription elongation factor DSIF/SUPT5H/SPT5[K]
ENSG00000145741	36.3101	113.505	-1.64432	7.88211e-202	2.45455e-200	down	BTF3	basic transcription factor 3 [Source:HGNC Symbol;Acc:HGNC:1125]	GO:0005515;GO:0006355;GO:0006351;GO:0005829;GO:0015031;GO:0005737;GO:0005634;GO:0006810;GO:0003723;GO:0006366;GO:0001701	K01527-ko04214 Apoptosis - fly	KOG2240-RNA polymerase II general transcription factor BTF3 and related proteins[K]
ENSG00000100129	61.8699	212.087	-1.77734	8.51145e-202	2.64569e-200	down	EIF3L	eukaryotic translation initiation factor 3 subunit L [Source:HGNC Symbol;Acc:HGNC:18138]	GO:0033290;GO:0016282;GO:0005852;GO:0006446;GO:0006413;GO:0006412;GO:0001731;GO:0003743;GO:0005737;GO:0005515;GO:0016020;GO:0003723;GO:0005829;GO:0075525;GO:0005730;GO:0005654;GO:0001650	-	KOG3677-RNA polymerase I-associated factor - PAF67[JK]
ENSG00000143799	8.25377	29.9526	-1.85956	8.98164e-202	2.78676e-200	down	PARP1	poly(ADP-ribose) polymerase 1 [Source:HGNC Symbol;Acc:HGNC:270]	GO:0005634;GO:2000679;GO:1904762;GO:1904646;GO:1904044;GO:1903376;GO:1901216;GO:1900182;GO:0071560;GO:0071294;GO:0070212;GO:0060391;GO:0051901;GO:0045944;GO:0044030;GO:0042769;GO:0033148;GO:0023019;GO:0016540;GO:0010990;GO:0010613;GO:0010332;GO:0006471;GO:0007179;GO:0070412;GO:0051287;GO:0046332;GO:0042826;GO:0030331;GO:0019899;GO:0003950;GO:0018312;GO:1990404;GO:0032993;GO:0005515;GO:0043234;GO:…	K10798-ko03410 Base excision repair;ko04210 Apoptosis;ko04214 Apoptosis - fly;ko04212 Longevity regulating pathway - worm	KOG1037-NAD+ ADP-ribosyltransferase Parp, required for poly-ADP ribosylation of nuclear proteins[KLO]
ENSG00000153914	3.05685	30.9272	-3.33876	1.8202e-201	5.63732e-200	down	SREK1	splicing regulatory glutamic acid and lysine rich protein 1 [Source:HGNC Symbol;Acc:HGNC:17882]	GO:0005654;GO:0016607;GO:0000381;GO:0005681;GO:0005515;GO:0005634;GO:0008380;GO:0006397;GO:0003723;GO:0003676	-	KOG4676-Splicing factor, arginine/serine-rich[A]
ENSG00000111676	7.46573	29.3114	-1.9731	2.04063e-201	6.30855e-200	down	ATN1	atrophin 1 [Source:HGNC Symbol;Acc:HGNC:3033]	GO:0005515;GO:0006355;GO:0006351;GO:0005654;GO:0005737;GO:0005634;GO:0048471;GO:0030054;GO:0003714;GO:0000122;GO:0019904;GO:0007417;GO:0016363;GO:0051402	-	KOG2133-Transcriptional corepressor Atrophin-1/DRPLA[R]
ENSG00000009307	26.339	53.7625	-1.0294	2.23556e-201	6.89863e-200	down	CSDE1	cold shock domain containing E1 [Source:HGNC Symbol;Acc:HGNC:29905]	GO:0005515;GO:0005886;GO:0003677;GO:0006355;GO:0005829;GO:0005794;GO:0005737;GO:0003723;GO:0003676;GO:0008584;GO:0070937;GO:0070966;GO:0005743	-	-
ENSG00000162613	1.01921	40.3221	-5.30605	3.10968e-201	9.57871e-200	down	FUBP1	far upstream element binding protein 1 [Source:HGNC Symbol;Acc:HGNC:4004]	GO:0005515;GO:0006355;GO:0006351;GO:0003677;GO:0005634;GO:0003723;GO:0003676;GO:0010628;GO:0006366;GO:0003700;GO:0003697	-	KOG1676-K-homology type RNA binding proteins[A]
ENSG00000178105	0.030004	24.6105	-9.6799	7.18835e-201	2.21022e-199	down	DDX10	DEAD-box helicase 10 [Source:HGNC Symbol;Acc:HGNC:2735]	GO:0004386;GO:0016787;GO:0005524;GO:0000166;GO:0003723;GO:0003676;GO:0004004;GO:0010501;GO:0003724	-	KOG0342-ATP-dependent RNA helicase pitchoune[A]
ENSG00000010322	1.01457	16.6307	-4.03491	9.36398e-201	2.87398e-199	down	NISCH	nischarin [Source:HGNC Symbol;Acc:HGNC:18006]	GO:0005515;GO:0005886;GO:0016020;GO:0005737;GO:0006915;GO:0035091;GO:0042802;GO:0005768;GO:0005769;GO:0055037;GO:0005829;GO:0048243;GO:0032228;GO:0030336;GO:0030036;GO:0016601;GO:0008217;GO:0006006;GO:0005178	-	-
ENSG00000005810	1.00155	6.2629	-2.6446	7.12523e-200	2.18294e-198	down	MYCBP2	MYC binding protein 2, E3 ubiquitin protein ligase [Source:HGNC Symbol;Acc:HGNC:23386]	GO:0005515;GO:0006355;GO:0006351;GO:0016567;GO:0016740;GO:0046872;GO:0008270;GO:0016020;GO:0005634;GO:0004842	-	KOG1428-Inhibitor of type V adenylyl cyclases/Neuronal presynaptic protein Highwire/PAM/RPM-1[T]
ENSG00000163719	0.825418	18.5688	-4.49161	7.80902e-200	2.38813e-198	down	MTMR14	myotubularin related protein 14 [Source:HGNC Symbol;Acc:HGNC:26190]	GO:0005515;GO:0035335;GO:0016311;GO:0016791;GO:0004725;GO:0016787;GO:0005737;GO:0048471;GO:0006470;GO:0005829;GO:0001726;GO:0006661;GO:0004722;GO:0004438;GO:0052629;GO:0016236	K18086-ko00562 Inositol phosphate metabolism;ko04070 Phosphatidylinositol signaling system	-
ENSG00000173575	1.56502	18.8727	-3.59205	8.34351e-200	2.54701e-198	down	CHD2	chromodomain helicase DNA binding protein 2 [Source:HGNC Symbol;Acc:HGNC:1917]	GO:0005515;GO:0016569;GO:0006355;GO:0006351;GO:0003677;GO:0032508;GO:0004386;GO:0016787;GO:0005654;GO:0005730;GO:0005634;GO:0005524;GO:0000166;GO:0043231;GO:0003723;GO:0001046;GO:0070062;GO:0007517;GO:0042393;GO:0006357;GO:0004003;GO:0060218;GO:0006974	-	KOG0383-Predicted helicase[R]
ENSG00000108654	10.8839	54.2486	-2.31739	2.13504e-199	6.50594e-198	down	DDX5	DEAD-box helicase 5 [Source:HGNC Symbol;Acc:HGNC:2746]	GO:0061614;GO:0045069;GO:0048306;GO:0035500;GO:0019899;GO:0005516;GO:0004004;GO:0048511;GO:0005681;GO:0005515;GO:0006355;GO:0006351;GO:0004386;GO:0016787;GO:0005524;GO:0000166;GO:0016020;GO:0005634;GO:0008380;GO:0006397;GO:0003723;GO:0003676;GO:0003713;GO:0005730;GO:0000956;GO:0000122;GO:0045944;GO:0070062;GO:0010501;GO:0030331;GO:0005654;GO:0006357;GO:0031012;GO:0043021;GO:0000398;GO:0030509;GO:…	K12823-ko03040 Spliceosome;ko05202 Transcriptional misregulation in cancers;ko05205 Proteoglycans in cancer	KOG0331-ATP-dependent RNA helicase[A]
ENSG00000130702	31.423	112.377	-1.83846	2.72546e-199	8.29026e-198	down	LAMA5	laminin subunit alpha 5 [Source:HGNC Symbol;Acc:HGNC:6485]	GO:0043259;GO:0043083;GO:0005610;GO:0005605;GO:0005604;GO:0005578;GO:0090002;GO:0060445;GO:0060271;GO:0048754;GO:0042475;GO:0042127;GO:0030324;GO:0016331;GO:0009887;GO:0007517;GO:0001942;GO:0001755;GO:0001738;GO:0001658;GO:0005178;GO:0005576;GO:0005102;GO:0007155;GO:0005634;GO:0005615;GO:0030154;GO:0007229;GO:0030334;GO:0030155;GO:0045995;GO:0007010;GO:0070062;GO:0031012;GO:0008283;GO:0048041;GO:…	K06240-ko04151 PI3K-Akt signaling pathway;ko04512 ECM-receptor interaction;ko04510 Focal adhesion;ko05200 Pathways in cancer;ko05222 Small cell lung cancer;ko05146 Amoebiasis;ko05145 Toxoplasmosis	KOG1836-Extracellular matrix glycoprotein Laminin subunits alpha and gamma[W]
ENSG00000127804	5.60011	19.8639	-1.82662	5.46292e-199	1.65874e-197	down	METTL16	methyltransferase like 16 [Source:HGNC Symbol;Acc:HGNC:28484]	GO:0032259;GO:0016740;GO:0008168;GO:0003723;GO:0005634;GO:0070475;GO:0052907	-	KOG2912-Predicted DNA methylase[S]
ENSG00000115268	1639	1220.04	0.425887	5.82951e-199	1.7669e-197	-	RPS15	ribosomal protein S15 [Source:HGNC Symbol;Acc:HGNC:10388]	GO:0015935;GO:0005840;GO:0006412;GO:0003735;GO:0030529;GO:0003723;GO:0005515;GO:0003677;GO:0016020;GO:0005634;GO:0022627;GO:0005654;GO:0005925;GO:0006364;GO:0042274;GO:0000028;GO:0005829;GO:0006413;GO:0000184;GO:0019083;GO:0001649;GO:0006614;GO:0000056	K02958-ko03010 Ribosome	KOG0898-40S ribosomal protein S15[J]
ENSG00000164040	13.8097	1.7209	3.00444	1.24522e-198	3.76751e-197	up	PGRMC2	progesterone receptor membrane component 2 [Source:HGNC Symbol;Acc:HGNC:16089]	GO:0005515;GO:0016021;GO:0016020;GO:0043401;GO:0008289;GO:0005496;GO:0020037;GO:0003707;GO:0005635	-	KOG1110-Putative steroid membrane receptor Hpr6.6/25-Dx[R]
ENSG00000136463	0.494793	32.2396	-6.02587	1.63855e-198	4.94876e-197	down	TACO1	translational activator of cytochrome c oxidase I [Source:HGNC Symbol;Acc:HGNC:24316]	GO:0005739;GO:0005515;GO:0005634;GO:0006417	-	KOG2972-Uncharacterized conserved protein[S]
ENSG00000105676	3.50515	30.3942	-3.11625	4.05984e-198	1.22399e-196	down	ARMC6	armadillo repeat containing 6 [Source:HGNC Symbol;Acc:HGNC:25049]	GO:0005829;GO:0002244	-	KOG4199-Uncharacterized conserved protein[S]
ENSG00000180879	585.853	252.219	1.21586	4.45436e-197	1.34056e-195	up	SSR4	signal sequence receptor subunit 4 [Source:HGNC Symbol;Acc:HGNC:11326]	GO:0005784;GO:0005783;GO:0005789;GO:0016021;GO:0016020;GO:0070062	K04571-ko04141 Protein processing in endoplasmic reticulum	KOG4088-Translocon-associated complex TRAP, delta subunit[U]
ENSG00000137962	1.35983	15.0339	-3.46672	1.2523e-196	3.76221e-195	down	ARHGAP29	Rho GTPase activating protein 29 [Source:HGNC Symbol;Acc:HGNC:30207]	GO:0043547;GO:0007165;GO:0035556;GO:0005622;GO:0046872;GO:0005096;GO:0005829;GO:0005737;GO:0051056;GO:0007266;GO:0030165	-	KOG1453-Chimaerin and related Rho GTPase activating proteins[T]
ENSG00000110321	21.9202	43.398	-0.985369	2.368e-196	7.10149e-195	-	EIF4G2	eukaryotic translation initiation factor 4 gamma 2 [Source:HGNC Symbol;Acc:HGNC:3297]	GO:0030424;GO:0060999;GO:0045773;GO:0045727;GO:0007507;GO:0006413;GO:0003743;GO:0003723;GO:0005515;GO:0006446;GO:0006412;GO:0016020;GO:0005829;GO:0045296;GO:0006417;GO:0010507;GO:0005913;GO:0008135;GO:0007050;GO:0016281;GO:0008219;GO:0030307;GO:0034645	K03260-ko03013 RNA transport;ko05416 Viral myocarditis	-
ENSG00000157870	28.0964	7.44821	1.91542	3.70543e-195	1.10928e-193	up	FAM213B	family with sequence similarity 213 member B [Source:HGNC Symbol;Acc:HGNC:28390]	GO:0006633;GO:0006631;GO:0005829;GO:0006629;GO:0005783;GO:0055114;GO:0016491;GO:0005737;GO:0098869;GO:0070062;GO:0001516;GO:0006693;GO:0043209;GO:0047017;GO:0016209;GO:0016616	-	-
ENSG00000107816	3.78019	11.9781	-1.66386	6.50321e-195	1.94343e-193	down	LZTS2	leucine zipper tumor suppressor 2 [Source:HGNC Symbol;Acc:HGNC:29381]	GO:0051301;GO:0005515;GO:0005886;GO:0005829;GO:0005737;GO:0016055;GO:0007049;GO:0005856;GO:0005874;GO:0005815;GO:0031982;GO:1900181;GO:0090090;GO:0072001;GO:0030178;GO:0008285;GO:0001822	-	-
ENSG00000167978	28.4119	56.3187	-0.98712	3.06209e-194	9.13478e-193	-	SRRM2	serine/arginine repetitive matrix 2 [Source:HGNC Symbol;Acc:HGNC:16639]	GO:0005681;GO:0016607;GO:0005634;GO:0008380;GO:0006397;GO:0003723;GO:0005654;GO:0000398;GO:0047485;GO:0015030;GO:0071013;GO:0070742	-	KOG1869-Splicing coactivator SRm160/300, subunit SRm300[A]
ENSG00000185787	7.15294	46.0784	-2.68748	6.57217e-194	1.95717e-192	down	MORF4L1	mortality factor 4 like 1 [Source:HGNC Symbol;Acc:HGNC:16989]	GO:0016569;GO:0006355;GO:0006351;GO:0016607;GO:0005634;GO:0006325;GO:0005515;GO:0006281;GO:0006974;GO:0006310;GO:0040008;GO:0005654;GO:0006338;GO:0047485;GO:0043967;GO:0000724;GO:0006342;GO:0043968;GO:0035267;GO:0016575;GO:0016580;GO:0008283;GO:0003682	-	KOG3001-Dosage compensation regulatory complex/histone acetyltransferase complex, subunit MSL-3/MRG15/EAF3, and related CHROMO domain-containing proteins[BK]
ENSG00000168214	17.5979	21.8846	-0.314515	1.64111e-193	4.87865e-192	-	RBPJ	recombination signal binding protein for immunoglobulin kappa J region [Source:HGNC Symbol;Acc:HGNC:5724]	GO:0003700;GO:0003677;GO:0006355;GO:0005634;GO:0000978;GO:0000982;GO:0006357;GO:0017053;GO:0070491;GO:0005515;GO:0006351;GO:0005654;GO:0005737;GO:0007219;GO:0006310;GO:0005730;GO:0043565;GO:0045944;GO:0008134;GO:0000122;GO:0045892;GO:0006367;GO:0030513;GO:0003151;GO:0001103;GO:0001525;GO:0030279;GO:0001837;GO:0003198;GO:0060045;GO:2000138;GO:0061314;GO:0003214;GO:0003222;GO:0035912;GO:0003160;GO:…	K06053-ko04330 Notch signaling pathway;ko05203 Viral carcinogenesis;ko05169 Epstein-Barr virus infection	KOG3743-Recombination signal binding protein-J kappa(CBF1, Su(H), HS2NF5)[K]
ENSG00000124145	207.035	145.088	0.512941	3.44785e-193	1.02318e-191	-	SDC4	syndecan 4 [Source:HGNC Symbol;Acc:HGNC:10661]	GO:0045121;GO:0043034;GO:0009986;GO:0005925;GO:0060122;GO:0051894;GO:0051496;GO:0045860;GO:0042060;GO:0010762;GO:0001843;GO:0001657;GO:0005080;GO:0001968;GO:0005576;GO:0005515;GO:0016020;GO:0016021;GO:0007165;GO:0050900;GO:0005886;GO:0005887;GO:0070062;GO:0043202;GO:0001523;GO:0006024;GO:0006027;GO:0030203;GO:0005796;GO:1903543;GO:1903553;GO:0070053;GO:0042130	K16338-ko04512 ECM-receptor interaction;ko04514 Cell adhesion molecules (CAMs);ko05205 Proteoglycans in cancer	-
ENSG00000170027	1.75664	16.654	-3.24498	7.7494e-193	2.29571e-191	down	YWHAG	tyrosine 3-monooxygenase/tryptophan 5-monooxygenase activation protein gamma [Source:HGNC Symbol;Acc:HGNC:12852]	GO:0043209;GO:0031982;GO:0032869;GO:0006605;GO:0030971;GO:0019904;GO:0005515;GO:0016020;GO:0005737;GO:0003723;GO:0071901;GO:0005925;GO:0005739;GO:0005829;GO:0070062;GO:0061024;GO:0000086;GO:0097711;GO:0005159;GO:0009966;GO:0006469;GO:1900740;GO:0048167;GO:0030659;GO:0005080;GO:0008426;GO:0045664	K16198-ko04390 Hippo signaling pathway;ko04151 PI3K-Akt signaling pathway;ko04110 Cell cycle;ko04114 Oocyte meiosis;ko05203 Viral carcinogenesis;ko05169 Epstein-Barr virus infection	KOG0841-Multifunctional chaperone (14-3-3 family)[O]
ENSG00000125967	1.28837	28.9661	-4.49075	8.80254e-193	2.60317e-191	down	NECAB3	N-terminal EF-hand calcium binding protein 3 [Source:HGNC Symbol;Acc:HGNC:15851]	GO:0005783;GO:0000137;GO:0005794;GO:0005509;GO:0005789;GO:0046872;GO:0005737;GO:0005634;GO:0005515;GO:0009306;GO:0019538;GO:0042984	-	-
ENSG00000172725	26.2615	101.336	-1.94813	8.89635e-193	2.62635e-191	down	CORO1B	coronin 1B [Source:HGNC Symbol;Acc:HGNC:2253]	GO:0005515;GO:0005829;GO:0003779;GO:0005737;GO:0048471;GO:0005856;GO:0005925;GO:0045296;GO:0051015;GO:0030027;GO:0031252;GO:0070062;GO:0071944;GO:0042802;GO:0051017;GO:0016477;GO:0005884;GO:0042060;GO:0001725;GO:0035767;GO:0005886;GO:0031529;GO:2000394;GO:0071672;GO:0034315;GO:0036120;GO:0071933;GO:0030036;GO:0034316;GO:0090135;GO:1902463	-	KOG0303-Actin-binding protein Coronin, contains WD40 repeats[Z]
ENSG00000187608	1441.99	1158.13	0.316258	3.40467e-192	1.00338e-190	-	ISG15	ISG15 ubiquitin-like modifier [Source:HGNC Symbol;Acc:HGNC:4053]	GO:0051607;GO:0045648;GO:0042742;GO:0032020;GO:0030501;GO:0019941;GO:0031386;GO:0005576;GO:0005515;GO:0005737;GO:0002376;GO:0045087;GO:0005829;GO:0005654;GO:0045071;GO:0016032;GO:0060337;GO:0019985;GO:0032480;GO:0031397;GO:0032649;GO:0034340	K12159-ko04622 RIG-I-like receptor signaling pathway	KOG0001-Ubiquitin and ubiquitin-like proteins[OR]
ENSG00000121653	0.370741	14.7193	-5.31115	3.56854e-192	1.04985e-190	down	MAPK8IP1	mitogen-activated protein kinase 8 interacting protein 1 [Source:HGNC Symbol;Acc:HGNC:6882]	GO:0048471;GO:0045202;GO:0044302;GO:0044297;GO:0044295;GO:0044294;GO:0043005;GO:0030425;GO:0030424;GO:0016020;GO:0005829;GO:0005737;GO:2001243;GO:0046329;GO:0046328;GO:0043508;GO:0043066;GO:0016192;GO:0007258;GO:0007165;GO:0006355;GO:0031435;GO:0031434;GO:0019901;GO:0019894;GO:0008432;GO:0005078;GO:0005515;GO:0005739;GO:0009967;GO:0005789;GO:0005783;GO:0005634;GO:0031966;GO:0004860	K04434-ko04010 MAPK signaling pathway	KOG3775-Mitogen-activated protein kinase scaffold protein JIP[T]
ENSG00000121390	1.29618	21.5933	-4.05824	1.15609e-191	3.39533e-190	down	PSPC1	paraspeckle component 1 [Source:HGNC Symbol;Acc:HGNC:20320]	GO:0048511;GO:0005515;GO:0001650;GO:0006355;GO:0006351;GO:0005654;GO:0016607;GO:0005737;GO:0005634;GO:0003723;GO:0003676;GO:0005730;GO:0001047;GO:0000398;GO:0045892;GO:0016363;GO:0000976;GO:0042752;GO:0042382	-	KOG0115-RNA-binding protein p54nrb (RRM superfamily)[A]
ENSG00000084207	366.578	255.018	0.523523	1.35059e-191	3.9597e-190	-	GSTP1	glutathione S-transferase pi 1 [Source:HGNC Symbol;Acc:HGNC:4638]	GO:0005886;GO:0005829;GO:0005737;GO:0005634;GO:1904706;GO:0071672;GO:0071460;GO:0071385;GO:0071364;GO:0045471;GO:0043200;GO:0033591;GO:0032869;GO:0032355;GO:0031667;GO:0031100;GO:0014003;GO:0009636;GO:0006805;GO:0006469;GO:0043295;GO:0019901;GO:0008144;GO:0004364;GO:0034599;GO:0005515;GO:0005739;GO:0008152;GO:0016740;GO:0005615;GO:0098869;GO:0005576;GO:0070062;GO:0006749;GO:0043312;GO:0043066;GO:…	K00799-ko00480 Glutathione metabolism;ko00980 Metabolism of xenobiotics by cytochrome P450;ko00982 Drug metabolism - cytochrome P450;ko05204 Chemical carcinogenesis;ko01524 Platinum drug resistance	KOG1695-Glutathione S-transferase[O]
ENSG00000130826	6.83867	25.7876	-1.91489	2.85925e-190	8.36848e-189	down	DKC1	dyskerin pseudouridine synthase 1 [Source:HGNC Symbol;Acc:HGNC:2890]	GO:0015030;GO:0005730;GO:1904872;GO:0051973;GO:0033979;GO:0032212;GO:0031118;GO:0005515;GO:0001650;GO:0030529;GO:0005634;GO:0016853;GO:0005737;GO:0006396;GO:0003723;GO:0009982;GO:0001522;GO:0009451;GO:0006364;GO:0042254;GO:0005654;GO:0008283;GO:0003720;GO:0070034;GO:0007004;GO:0005697;GO:0034513;GO:0000495;GO:0031120;GO:0090669;GO:1904851;GO:1904874;GO:1990481;GO:0031429;GO:0072589;GO:0090661;GO:…	K11131-ko03008 Ribosome biogenesis in eukaryotes	KOG2529-Pseudouridine synthase[J]
ENSG00000149187	7.8976	17.9564	-1.18502	6.81574e-190	1.99141e-188	down	CELF1	CUGBP Elav-like family member 1 [Source:HGNC Symbol;Acc:HGNC:2549]	GO:0030529;GO:0005654;GO:0016020;GO:0005737;GO:0005634;GO:0008380;GO:0006397;GO:0003723;GO:0003676;GO:0005515;GO:0043484;GO:0009790;GO:0006376;GO:0007281;GO:0003729;GO:0017148;GO:0000900;GO:0042835;GO:0016246;GO:0040018;GO:0007286;GO:0031369	-	KOG0146-RNA-binding protein ETR-3 (RRM superfamily)[A]
ENSG00000162511	197.003	130.934	0.589379	2.13934e-189	6.23999e-188	-	LAPTM5	lysosomal protein transmembrane 5 [Source:HGNC Symbol;Acc:HGNC:29612]	GO:0005764;GO:0005515;GO:0005765;GO:0005887;GO:0006810;GO:0016021;GO:0016020	K12387-ko04142 Lysosome	-
ENSG00000198901	5.83223	24.5158	-2.07159	2.09904e-188	6.11196e-187	down	PRC1	protein regulator of cytokinesis 1 [Source:HGNC Symbol;Acc:HGNC:9341]	GO:0005515;GO:0005856;GO:0015630;GO:0005886;GO:0051301;GO:0005654;GO:0005737;GO:0005634;GO:0008017;GO:0007049;GO:0001578;GO:0005874;GO:0000226;GO:0000922;GO:0005819;GO:0030496;GO:0000910;GO:0005829;GO:0008284;GO:0019894;GO:0019901;GO:0000022;GO:0005876;GO:0070938	-	KOG4302-Microtubule-associated protein essential for anaphase spindle elongation[DZ]
ENSG00000104904	1381.46	1040.43	0.409011	9.21349e-188	2.6782e-186	-	OAZ1	ornithine decarboxylase antizyme 1 [Source:HGNC Symbol;Acc:HGNC:8095]	GO:0005829;GO:0008073;GO:0006595;GO:0043086;GO:1902268;GO:0090316;GO:0045732;GO:0006810;GO:0005634;GO:0005737;GO:0005515;GO:0006521;GO:0006596	-	KOG4387-Ornithine decarboxylase antizyme[E]
ENSG00000143319	0.379415	13.9813	-5.20358	1.66302e-187	4.82588e-186	down	ISG20L2	interferon stimulated exonuclease gene 20 like 2 [Source:HGNC Symbol;Acc:HGNC:25745]	GO:0005515;GO:0090305;GO:0016787;GO:0005634;GO:0003723;GO:0003676;GO:0004527;GO:0004518;GO:0005730;GO:0042254;GO:0090503;GO:0005654;GO:0006364;GO:0000175	-	KOG2249-3'-5' exonuclease[L]
ENSG00000137331	461.596	313.359	0.558812	3.0551e-187	8.85044e-186	-	IER3	immediate early response 3 [Source:HGNC Symbol;Acc:HGNC:5392]	GO:0043066;GO:0005515;GO:0016021;GO:0016020;GO:0005829;GO:0006915;GO:0005634;GO:0014066;GO:0009653;GO:0010941;GO:2001020	-	-
ENSG00000167863	41.9619	185.347	-2.14308	3.34374e-187	9.67015e-186	down	ATP5H	ATP synthase, H+ transporting, mitochondrial Fo complex subunit D [Source:HGNC Symbol;Acc:HGNC:845]	GO:0042407;GO:0006811;GO:0005739;GO:0005743;GO:0005654;GO:0005829;GO:0016020;GO:0006810;GO:0099132;GO:0015078;GO:0015992;GO:0015986;GO:0070062;GO:0000276;GO:0016887;GO:0046933;GO:0022857;GO:0006754;GO:0042776;GO:0000274;GO:0005753;GO:0045263	K02138-ko00190 Oxidative phosphorylation;ko05010 Alzheimer's disease;ko05012 Parkinson's disease;ko05016 Huntington's disease	KOG3366-Mitochondrial F1F0-ATP synthase, subunit d/ATP7[C]
ENSG00000170498	1017.01	706.183	0.526226	5.95116e-187	1.71817e-185	-	KISS1	KiSS-1 metastasis-suppressor [Source:HGNC Symbol;Acc:HGNC:6341]	GO:0043025;GO:0043005;GO:0016324;GO:0005737;GO:0005615;GO:0060124;GO:0060112;GO:0051482;GO:0050806;GO:0046697;GO:0043410;GO:0033686;GO:0008285;GO:0007204;GO:0007186;GO:0031773;GO:0005576;GO:0005515;GO:0007010	-	-
ENSG00000156976	2.83248	44.3902	-3.97011	7.35868e-187	2.12094e-185	down	EIF4A2	eukaryotic translation initiation factor 4A2 [Source:HGNC Symbol;Acc:HGNC:3284]	GO:0005524;GO:0003676;GO:0005515;GO:0004386;GO:0016787;GO:0000166;GO:0006413;GO:0006412;GO:0003743;GO:0003723;GO:0048471;GO:0005829;GO:0004004;GO:0010501;GO:0000289;GO:0016032;GO:0010468;GO:0016887;GO:0006446;GO:0016281;GO:1900260	K03257-ko03013 RNA transport	KOG0327-Translation initiation factor 4F, helicase subunit (eIF-4A) and related helicases[J]
ENSG00000111678	886.514	625.493	0.50315	8.36178e-187	2.40599e-185	-	C12orf57	chromosome 12 open reading frame 57 [Source:HGNC Symbol;Acc:HGNC:29521]	GO:0005737	-	-
ENSG00000139697	0.362006	4.81608	-3.73377	9.12595e-187	2.62144e-185	-	SBNO1	strawberry notch homolog 1 [Source:HGNC Symbol;Acc:HGNC:22973]	GO:0006355;GO:0003674;GO:0008150;GO:0005575	-	KOG1513-Nuclear helicase MOP-3/SNO (DEAD-box superfamily)[KT]
ENSG00000122026	3830.99	4666.71	-0.284688	3.00379e-186	8.61389e-185	-	RPL21	ribosomal protein L21 [Source:HGNC Symbol;Acc:HGNC:10313]	GO:0005840;GO:0006412;GO:0003735;GO:0005622;GO:0030529;GO:0016020;GO:0003723;GO:0005829;GO:0005515;GO:0006413;GO:0006364;GO:0000184;GO:0019083;GO:0006614;GO:0022625	K02889-ko03010 Ribosome	KOG1732-60S ribosomal protein L21[J]
ENSG00000101945	16.0133	1.248	3.68158	1.44458e-185	4.13562e-184	up	SUV39H1	suppressor of variegation 3-9 homolog 1 [Source:HGNC Symbol;Acc:HGNC:11479]	GO:0048511;GO:0005515;GO:0005694;GO:0016569;GO:0006355;GO:0006351;GO:0032259;GO:0016740;GO:0008168;GO:0046872;GO:0008270;GO:0005634;GO:0007049;GO:0030154;GO:0018024;GO:0005654;GO:0034968;GO:0006364;GO:0000775;GO:0016032;GO:0047485;GO:0045892;GO:0000976;GO:0000794;GO:0042754;GO:0006974;GO:0008757;GO:0000183;GO:0005677;GO:0033553;GO:0003682;GO:0042054;GO:0046974;GO:0000122;GO:0006325;GO:0036123;GO:…	K11419-ko00310 Lysine degradation	KOG1082-Histone H3 (Lys9) methyltransferase SUV39H1/Clr4, required for transcriptional silencing[BK]
ENSG00000167470	2.75064	15.0142	-2.44848	5.11215e-185	1.46108e-183	down	MIDN	midnolin [Source:HGNC Symbol;Acc:HGNC:16298]	GO:0005829;GO:0005737;GO:0005634;GO:0005730;GO:0046676;GO:0033132;GO:0019900	-	-
ENSG00000071859	785.795	626.169	0.327602	1.27352e-184	3.63369e-183	-	FAM50A	family with sequence similarity 50 member A [Source:HGNC Symbol;Acc:HGNC:18786]	GO:0005634;GO:0003723;GO:0007283	-	KOG2894-Uncharacterized conserved protein XAP-5[S]
ENSG00000171863	468.952	293.967	0.673785	1.94315e-184	5.53504e-183	-	RPS7	ribosomal protein S7 [Source:HGNC Symbol;Acc:HGNC:10440]	GO:1902255;GO:0030154;GO:0001843;GO:2000059;GO:1904667;GO:1990948;GO:0050821;GO:0010628;GO:0048027;GO:0003730;GO:0043234;GO:0005515;GO:0005840;GO:0006412;GO:0003735;GO:0005622;GO:0030529;GO:0016020;GO:0005737;GO:0005634;GO:0003723;GO:0022627;GO:0005856;GO:0005925;GO:0005815;GO:0006364;GO:0042274;GO:0005730;GO:0005829;GO:0070062;GO:0005654;GO:0031012;GO:0006413;GO:0000184;GO:0019083;GO:0006614	K02993-ko03010 Ribosome	KOG3320-40S ribosomal protein S7[J]
ENSG00000153560	0.853163	11.9158	-3.80392	3.62785e-184	1.03167e-182	down	UBP1	upstream binding protein 1 (LBP-1a) [Source:HGNC Symbol;Acc:HGNC:12507]	GO:0001525;GO:0006355;GO:0006351;GO:0003677;GO:0005654;GO:0005829;GO:0005634;GO:0045892;GO:0003714;GO:0003700;GO:0006357;GO:0019079	-	KOG4091-Transcription factor[K]
ENSG00000143222	39.7853	2.01868	4.30075	7.68169e-184	2.18083e-182	up	UFC1	ubiquitin-fold modifier conjugating enzyme 1 [Source:HGNC Symbol;Acc:HGNC:26941]	GO:0005737;GO:0005515;GO:0070062;GO:0071568;GO:0034976;GO:0071569;GO:1990592	-	KOG3357-Uncharacterized conserved protein[S]
ENSG00000136878	10.3092	0.817992	3.6557	8.22087e-184	2.33002e-182	up	USP20	ubiquitin specific peptidase 20 [Source:HGNC Symbol;Acc:HGNC:12619]	GO:0006508;GO:0008234;GO:0008233;GO:0005515;GO:0016787;GO:0016579;GO:0004843;GO:0046872;GO:0008270;GO:0005737;GO:0036459;GO:0006511;GO:0048471;GO:0005856;GO:0005813;GO:0005815;GO:0005829;GO:0006897;GO:0070536;GO:0071108;GO:0001664;GO:0008277;GO:0004197	-	KOG1870-Ubiquitin C-terminal hydrolase[O]
ENSG00000155906	21.2627	0.446403	5.57384	9.5521e-184	2.70283e-182	up	RMND1	required for meiotic nuclear division 1 homolog [Source:HGNC Symbol;Acc:HGNC:21176]	GO:0005739;GO:0005515;GO:0006412;GO:0070131	-	KOG2861-Uncharacterized conserved protein[S]
ENSG00000189403	4.62767	35.0293	-2.9202	2.04557e-183	5.77848e-182	down	HMGB1	high mobility group box 1 [Source:HGNC Symbol;Acc:HGNC:4983]	GO:0043005;GO:0005769;GO:0005737;GO:0005634;GO:0005615;GO:2000819;GO:2000426;GO:1903672;GO:1901224;GO:0090303;GO:0051384;GO:0070374;GO:0050718;GO:0045944;GO:0045819;GO:0045639;GO:0045089;GO:0035767;GO:0034145;GO:0034137;GO:0032760;GO:0032755;GO:0032728;GO:0032727;GO:0031497;GO:0030324;GO:0010506;GO:0006284;GO:0002840;GO:0002643;GO:0002281;GO:0002270;GO:0001935;GO:0001773;GO:0001934;GO:0001654;GO:…	K10802-ko03410 Base excision repair	KOG0381-HMG box-containing protein[R]
ENSG00000166311	3.59984	21.1018	-2.55136	2.67911e-183	7.55562e-182	down	SMPD1	sphingomyelin phosphodiesterase 1 [Source:HGNC Symbol;Acc:HGNC:11120]	GO:0042599;GO:0005615;GO:0046513;GO:0043065;GO:0042493;GO:0042220;GO:0061750;GO:0008270;GO:0016798;GO:0005576;GO:0008152;GO:0005515;GO:0016787;GO:0005886;GO:0046872;GO:0005764;GO:0005768;GO:0006687;GO:0070062;GO:0004767;GO:0006685;GO:0007399;GO:0007165;GO:0043202;GO:0006684;GO:0035307;GO:0043407;GO:0023021;GO:0016021;GO:0016020	-	KOG3770-Acid sphingomyelinase and PHM5 phosphate metabolism protein[I]
ENSG00000167645	221.883	91.3173	1.28084	2.94016e-183	8.27812e-182	up	YIF1B	Yip1 interacting factor homolog B, membrane trafficking protein [Source:HGNC Symbol;Acc:HGNC:30511]	GO:0016021;GO:0016020;GO:0030173;GO:0006888;GO:0005789;GO:0030134;GO:0005793	-	KOG3094-Predicted membrane protein[S]
ENSG00000170369	204.312	87.8902	1.217	3.70214e-183	1.04063e-181	up	CST2	cystatin SA [Source:HGNC Symbol;Acc:HGNC:2474]	GO:0005576;GO:0005515;GO:0010951;GO:0005615;GO:0004869;GO:0030414;GO:0010466;GO:0001580	K13898-ko04970 Salivary secretion	-
ENSG00000130731	287.894	145.373	0.985778	6.17927e-183	1.73406e-181	-	METTL26	methyltransferase like 26 [Source:HGNC Symbol;Acc:HGNC:14141]	-	-	-
ENSG00000164889	220.538	163.411	0.432526	8.40231e-183	2.35403e-181	-	SLC4A2	solute carrier family 4 member 2 [Source:HGNC Symbol;Acc:HGNC:11028]	GO:0006820;GO:0016020;GO:0005452;GO:0015698;GO:0016324;GO:0016323;GO:0051453;GO:0048565;GO:0007283;GO:0019899;GO:0015297;GO:0006811;GO:0055085;GO:0005215;GO:0006810;GO:0016021;GO:0005925;GO:0008509;GO:0098656;GO:0005886;GO:0005887;GO:0015701;GO:0015301	K13855-ko04970 Salivary secretion;ko04971 Gastric acid secretion;ko04972 Pancreatic secretion;ko04976 Bile secretion	KOG1172-Na+-independent Cl/HCO3 exchanger AE1 and related transporters (SLC4 family)[P]
ENSG00000248643	1.45442	39.4594	-4.76185	9.50906e-183	2.65973e-181	down	RBM14-RBM4	RBM14-RBM4 readthrough [Source:HGNC Symbol;Acc:HGNC:38840]	GO:0003676	-	-
ENSG00000174917	401.288	317.883	0.336145	1.7485e-182	4.88262e-181	-	C19orf70	chromosome 19 open reading frame 70 [Source:HGNC Symbol;Acc:HGNC:33702]	GO:0005739;GO:0005743;GO:0061617;GO:0005654;GO:0016021;GO:0016020;GO:0042407;GO:0044284	-	-
ENSG00000137710	1.65865	19.5155	-3.55654	2.22523e-182	6.20369e-181	down	RDX	radixin [Source:HGNC Symbol;Acc:HGNC:9944]	GO:0019898;GO:0008092;GO:0005515;GO:0005856;GO:0051693;GO:0005886;GO:0042803;GO:0003779;GO:0016020;GO:0005737;GO:0003723;GO:0005615;GO:0005925;GO:0045296;GO:0030027;GO:0030175;GO:0070062;GO:0010628;GO:0071944;GO:0030335;GO:0005902;GO:0008360;GO:0016324;GO:0032154;GO:0061028;GO:0030864;GO:1900087;GO:0043087;GO:0008361;GO:0090002;GO:0045184;GO:0051018;GO:0051117;GO:0097067;GO:0010737;GO:1902115;GO:…	K05762-ko04810 Regulation of actin cytoskeleton;ko05206 MicroRNAs in cancer;ko05205 Proteoglycans in cancer	KOG3529-Radixin, moesin and related proteins of the ERM family[R]
ENSG00000213523	75.8279	19.2584	1.97724	3.69504e-182	1.02845e-180	up	SRA1	steroid receptor RNA activator 1 [Source:HGNC Symbol;Acc:HGNC:11281]	GO:0005515;GO:0015630;GO:0045171;GO:0005886;GO:0030529;GO:0006355;GO:0006351;GO:0005654;GO:0005829;GO:0005737;GO:0005634;GO:0006915;GO:0030154;GO:0003713;GO:0008283;GO:0042981;GO:0030374;GO:2000273	-	-
ENSG00000124193	10.8843	33.5386	-1.62357	3.90795e-182	1.08594e-180	down	SRSF6	serine and arginine rich splicing factor 6 [Source:HGNC Symbol;Acc:HGNC:10788]	GO:0005515;GO:0016607;GO:0005634;GO:0008380;GO:0006397;GO:0003723;GO:0003676;GO:0005654;GO:0006369;GO:0006405;GO:0031124;GO:0000381;GO:0048025;GO:0000398;GO:0006406;GO:0060548;GO:0000380;GO:0006376;GO:0061041;GO:0036002;GO:0060501;GO:0045617;GO:0010837;GO:2000675;GO:0032868;GO:0010629	K12893-ko03040 Spliceosome;ko05168 Herpes simplex infection	KOG0106-Alternative splicing factor SRp55/B52/SRp75 (RRM superfamily)[A]
ENSG00000153827	1.32891	12.101	-3.18681	1.93185e-181	5.35948e-180	down	TRIP12	thyroid hormone receptor interactor 12 [Source:HGNC Symbol;Acc:HGNC:12306]	GO:0005515;GO:0004842;GO:0016567;GO:0016740;GO:0016607;GO:0005634;GO:0006281;GO:0006974;GO:0005654;GO:0005829;GO:0000209;GO:0042787;GO:0009790;GO:0046966;GO:1901315;GO:2000780	K10590-ko04120 Ubiquitin mediated proteolysis	KOG0168-Putative ubiquitin fusion degradation protein[O]
ENSG00000148303	1065.94	954.814	0.158838	2.35932e-181	6.53474e-180	-	RPL7A	ribosomal protein L7a [Source:HGNC Symbol;Acc:HGNC:10364]	GO:0005515;GO:0005840;GO:0030529;GO:0006412;GO:0005737;GO:0005634;GO:0003723;GO:0003735;GO:0042254;GO:0005925;GO:0005730;GO:0005829;GO:0045296;GO:0070062;GO:0006413;GO:0006364;GO:0000184;GO:0019083;GO:0016020;GO:0000470;GO:0006614;GO:0022625;GO:0042788	K02936-ko03010 Ribosome	KOG3166-60S ribosomal protein L7A[J]
ENSG00000185813	97.0871	69.6586	0.478979	2.41201e-181	6.66984e-180	-	PCYT2	phosphate cytidylyltransferase 2, ethanolamine [Source:HGNC Symbol;Acc:HGNC:8756]	GO:0008654;GO:0006646;GO:0009058;GO:0006629;GO:0003824;GO:0016740;GO:0016779;GO:0005575;GO:0005789;GO:0004306	K00967-ko00564 Glycerophospholipid metabolism;ko00440 Phosphonate and phosphinate metabolism	KOG2803-Choline phosphate cytidylyltransferase/Predicted CDP-ethanolamine synthase[I]
ENSG00000188130	15.4352	7.81876	0.981209	2.682e-181	7.40442e-180	-	MAPK12	mitogen-activated protein kinase 12 [Source:HGNC Symbol;Acc:HGNC:6874]	GO:0016310;GO:0000165;GO:0016301;GO:0004707;GO:0005622;GO:0016740;GO:0006468;GO:0005524;GO:0004674;GO:0000166;GO:0004672;GO:0005737;GO:0045786;GO:0005515;GO:0005739;GO:0006355;GO:0006351;GO:0046872;GO:0005634;GO:0007049;GO:0000287;GO:0035556;GO:0005829;GO:0005654;GO:0010468;GO:0007165;GO:0048010;GO:0007517;GO:0018105;GO:0007050;GO:0051149;GO:0045445;GO:0006975;GO:0010952	K04441-ko04015 Rap1 signaling pathway;ko04010 MAPK signaling pathway;ko04013 MAPK signaling pathway - fly;ko04011 MAPK signaling pathway - yeast;ko04370 VEGF signaling pathway;ko04668 TNF signaling pathway;ko04068 FoxO signaling pathway;ko04071 Sphingolipid signaling pathway;ko04139 Regulation of mitophagy - yeast;ko04550 Signaling pathways regulating pluripotency of stem cells;ko04611 Platelet a…	KOG0660-Mitogen-activated protein kinase[T]
ENSG00000096696	0.782732	7.02502	-3.16591	9.74419e-181	2.6858e-179	down	DSP	desmoplakin [Source:HGNC Symbol;Acc:HGNC:3052]	GO:0030057;GO:0016323;GO:0014704;GO:0005916;GO:0005911;GO:0005886;GO:0005882;GO:0071896;GO:0045109;GO:0045104;GO:0043588;GO:0042060;GO:0034332;GO:0016337;GO:0003223;GO:0002934;GO:0005515;GO:0005856;GO:0016020;GO:0005737;GO:0005634;GO:0003723;GO:0030054;GO:0070062;GO:0031424;GO:0031012;GO:0043312;GO:0050839;GO:0030674;GO:0005200;GO:0097110;GO:0030216;GO:0005198;GO:0008544;GO:0101003;GO:0086091;GO:…	K10381-ko05412 Arrhythmogenic right ventricular cardiomyopathy (ARVC)	-
ENSG00000261915	0.0001	31.3797	-18.2595	1.01921e-180	2.80472e-179	down	AC026954.2	-	-	-	-
ENSG00000125743	805.313	528.116	0.608695	1.92569e-180	5.29069e-179	-	SNRPD2	small nuclear ribonucleoprotein D2 polypeptide [Source:HGNC Symbol;Acc:HGNC:11159]	GO:0005681;GO:0005515;GO:0005829;GO:0030529;GO:0005737;GO:0005634;GO:0008380;GO:0006397;GO:0003723;GO:0000387;GO:0005685;GO:0070062;GO:0005654;GO:0030532;GO:0005682;GO:0046540;GO:0000398;GO:0034709;GO:0000245;GO:0051170;GO:0034719;GO:0071013;GO:0071011;GO:0005686;GO:0005689;GO:0005687;GO:0034715	K11096-ko03040 Spliceosome	KOG3459-Small nuclear ribonucleoprotein (snRNP) Sm core protein[A]
ENSG00000166326	1.54214	7.10832	-2.20458	2.48894e-180	6.82716e-179	down	TRIM44	tripartite motif containing 44 [Source:HGNC Symbol;Acc:HGNC:19016]	GO:0005515;GO:0005622;GO:0046872;GO:0008270;GO:0010468	-	-
ENSG00000132254	2.41047	31.2766	-3.69769	3.08755e-180	8.45553e-179	down	ARFIP2	ADP ribosylation factor interacting protein 2 [Source:HGNC Symbol;Acc:HGNC:17160]	GO:0005515;GO:0019904;GO:0005886;GO:0005737;GO:0042802;GO:0005829;GO:0045296;GO:0005938;GO:0001726;GO:0005525;GO:0030032;GO:0006928;GO:0007264;GO:0030036;GO:0030742;GO:0048365;GO:0031529;GO:0070273;GO:0034315;GO:0032588	-	KOG3876-Arfaptin and related proteins[T]
ENSG00000162614	0.321169	17.9797	-5.80689	4.18529e-180	1.14434e-178	down	NEXN	nexilin F-actin binding protein [Source:HGNC Symbol;Acc:HGNC:29557]	GO:0003779;GO:0005737;GO:0030054;GO:0005856;GO:0005925;GO:0051015;GO:0030018;GO:0005912;GO:0030334;GO:0008307;GO:0051493;GO:0048739	-	-
ENSG00000198087	1.20216	11.4349	-3.24974	5.40244e-180	1.47476e-178	down	CD2AP	CD2 associated protein [Source:HGNC Symbol;Acc:HGNC:14258]	GO:0048471;GO:0043234;GO:0031252;GO:0030139;GO:0005911;GO:0005886;GO:0005737;GO:2000249;GO:1900182;GO:0048259;GO:0043161;GO:0032911;GO:0016477;GO:0016337;GO:0016050;GO:0045296;GO:0032403;GO:0008022;GO:0008013;GO:0005172;GO:0007010;GO:0005515;GO:0051301;GO:0007049;GO:0005856;GO:0042995;GO:0070062;GO:0001726;GO:0017124;GO:0031941;GO:0007165;GO:0005200;GO:0006461;GO:0015629;GO:0006930	K13738-ko05100 Bacterial invasion of epithelial cells	KOG4348-Adaptor protein CMS/SETA[T]
ENSG00000167779	340.025	208.469	0.705809	7.53595e-180	2.05388e-178	-	IGFBP6	insulin like growth factor binding protein 6 [Source:HGNC Symbol;Acc:HGNC:5475]	GO:0001558;GO:0005520;GO:0005576;GO:0042568;GO:0005794;GO:0005737;GO:0005615;GO:0031995;GO:0031994;GO:0070062;GO:0044267;GO:0007165;GO:0019838;GO:0008285;GO:0090090;GO:0005102;GO:0043567	-	-
ENSG00000142937	1035.68	764.458	0.438068	1.21813e-179	3.31464e-178	-	RPS8	ribosomal protein S8 [Source:HGNC Symbol;Acc:HGNC:10441]	GO:0005840;GO:0006412;GO:0003735;GO:0005622;GO:0030529;GO:0005829;GO:0005783;GO:0016020;GO:0005737;GO:0005634;GO:0003723;GO:0022627;GO:0005925;GO:0000462;GO:0070062;GO:0005654;GO:0005515;GO:0006413;GO:0006364;GO:0000184;GO:0019083;GO:0006614	K02995-ko03010 Ribosome	KOG3283-40S ribosomal protein S8[J]
ENSG00000130640	402.236	411.287	-0.0321015	1.45588e-179	3.95525e-178	-	TUBGCP2	tubulin gamma complex associated protein 2 [Source:HGNC Symbol;Acc:HGNC:18599]	GO:0005813;GO:0005654;GO:0016020;GO:0005737;GO:0005856;GO:0005874;GO:0000226;GO:0005815;GO:0043015;GO:0007020;GO:0000922;GO:0005515;GO:0005829;GO:0005200;GO:0031122;GO:0006461;GO:0090307;GO:0051415;GO:0000923;GO:0051298;GO:0051011;GO:0008275;GO:0005881	-	KOG2001-Gamma-tubulin complex, DGRIP84/SPC97 component[Z]
ENSG00000092148	0.194425	13.8035	-6.14967	3.24835e-179	8.81088e-178	down	HECTD1	HECT domain E3 ubiquitin protein ligase 1 [Source:HGNC Symbol;Acc:HGNC:20157]	GO:0016567;GO:0004842;GO:0016740;GO:0046872;GO:0005515	-	-
ENSG00000034152	2.62243	26.3375	-3.32815	1.61686e-178	4.37862e-177	down	MAP2K3	mitogen-activated protein kinase kinase 3 [Source:HGNC Symbol;Acc:HGNC:6843]	GO:0060048;GO:0042035;GO:0006954;GO:0000187;GO:0000165;GO:0019901;GO:0004708;GO:0005515;GO:0018108;GO:0004713;GO:0016310;GO:0016301;GO:0005622;GO:0016740;GO:0006468;GO:0005524;GO:0004674;GO:0000166;GO:0004672;GO:0016020;GO:0045893;GO:0005737;GO:0005829;GO:0005654;GO:0007165;GO:0004702;GO:0035897;GO:0045860	K04432-ko04015 Rap1 signaling pathway;ko04010 MAPK signaling pathway;ko04013 MAPK signaling pathway - fly;ko04668 TNF signaling pathway;ko04620 Toll-like receptor signaling pathway;ko04624 Toll and Imd signaling pathway;ko04664 Fc epsilon RI signaling pathway;ko04912 GnRH signaling pathway;ko04750 Inflammatory mediator regulation of TRP channels;ko05014 Amyotrophic lateral sclerosis (ALS);ko05164…	KOG0984-Mitogen-activated protein kinase (MAPK) kinase MKK3/MKK6[T]
ENSG00000169241	3.82315	52.3903	-3.77647	2.82176e-178	7.6295e-177	down	SLC50A1	solute carrier family 50 member 1 [Source:HGNC Symbol;Acc:HGNC:30657]	GO:0016021;GO:0016020;GO:0006810;GO:0008643;GO:0005886;GO:0005794;GO:0000139;GO:0012505;GO:0005634;GO:0015758;GO:0051119;GO:0034219;GO:0042947;GO:0042946;GO:0045815	-	KOG1623-Multitransmembrane protein[R]
ENSG00000077097	0.743303	9.37615	-3.65697	1.06337e-177	2.87059e-176	down	TOP2B	topoisomerase (DNA) II beta [Source:HGNC Symbol;Acc:HGNC:11990]	GO:0006265;GO:0003677;GO:0005524;GO:0003918;GO:0003916;GO:0005829;GO:0006259;GO:0005654;GO:0005634;GO:0016853;GO:0000166;GO:0046872;GO:0005737;GO:0000712;GO:0006312;GO:0003682;GO:0008022;GO:0019899;GO:0046982;GO:0042826;GO:0016925;GO:0000792;GO:0005080;GO:0000819;GO:0044774;GO:0030900;GO:0007409;GO:0001764	K03164-ko01524 Platinum drug resistance	KOG0355-DNA topoisomerase type II[B]
ENSG00000142252	0.608655	27.6994	-5.50808	1.46287e-177	3.9428e-176	down	GEMIN7	gem nuclear organelle associated protein 7 [Source:HGNC Symbol;Acc:HGNC:20045]	GO:0005515;GO:0005829;GO:0005634;GO:0005737;GO:0008380;GO:0006397;GO:0005654;GO:0000387;GO:0000398;GO:0051170;GO:0032797;GO:0034719;GO:0097504;GO:0016604	K13135-ko03013 RNA transport	-
ENSG00000105700	2.18101	35.4135	-4.02123	1.83909e-177	4.949e-176	down	KXD1	KxDL motif containing 1 [Source:HGNC Symbol;Acc:HGNC:28420]	GO:0005515;GO:0005765;GO:0016020;GO:0005764;GO:0016192;GO:0032418;GO:0031083;GO:0099078	-	KOG3443-Uncharacterized conserved protein[S]
ENSG00000109861	17.1697	8.04142	1.09434	3.02106e-177	8.11684e-176	up	CTSC	cathepsin C [Source:HGNC Symbol;Acc:HGNC:2528]	GO:0005794;GO:0005783;GO:0005764;GO:2001235;GO:1903052;GO:0010033;GO:0007568;GO:0006508;GO:0001913;GO:0051087;GO:0043621;GO:0042802;GO:0031404;GO:0019902;GO:0016505;GO:0004252;GO:0008234;GO:0008233;GO:0005515;GO:0005813;GO:0016787;GO:0005654;GO:0043231;GO:0016020;GO:0005615;GO:0005576;GO:0000139;GO:0070062;GO:0043312;GO:0006955;GO:0006888;GO:0035578;GO:0048208;GO:0005788;GO:0033116;GO:0004197;GO:…	K01275-ko04142 Lysosome;ko04210 Apoptosis	KOG1543-Cysteine proteinase Cathepsin L[O]
ENSG00000082805	0.626337	14.4113	-4.52412	7.5213e-177	2.0176e-175	down	ERC1	ELKS/RAB6-interacting/CAST family member 1 [Source:HGNC Symbol;Acc:HGNC:17072]	GO:0048786;GO:0005515;GO:0005794;GO:0006355;GO:0015031;GO:0016020;GO:0005737;GO:0006810;GO:0000139;GO:0007275;GO:0045296;GO:0043066;GO:0051092;GO:0042734;GO:0017137;GO:0008385;GO:0043522;GO:0007252;GO:0042147;GO:0045202;GO:0030165	K16072-ko04064 NF-kappa B signaling pathway	KOG4809-Rab6 GTPase-interacting protein involved in endosome-to-TGN transport[U]
ENSG00000210196	164.685	1050.3	-2.67302	1.03821e-176	2.78065e-175	down	MT-TP	mitochondrially encoded tRNA proline [Source:HGNC Symbol;Acc:HGNC:7494]	-	-	-
ENSG00000105404	364.062	658.968	-0.856024	1.28361e-175	3.43249e-174	-	RABAC1	Rab acceptor 1 [Source:HGNC Symbol;Acc:HGNC:9794]	GO:0016021;GO:0016020;GO:0005794;GO:0070064;GO:0008022;GO:0005515;GO:0005886;GO:0005737;GO:0030054;GO:0045202;GO:0031410;GO:0042802;GO:0008021	-	KOG3142-Prenylated rab acceptor 1[U]
ENSG00000187840	737.004	568.621	0.374207	3.24054e-175	8.65193e-174	-	EIF4EBP1	eukaryotic translation initiation factor 4E binding protein 1 [Source:HGNC Symbol;Acc:HGNC:3288]	GO:0043234;GO:0005737;GO:0005634;GO:1990928;GO:0071549;GO:0071456;GO:0045947;GO:0045471;GO:0031333;GO:0030324;GO:0008286;GO:0002931;GO:0002192;GO:0051721;GO:0031369;GO:0008190;GO:0005515;GO:0005829;GO:0006417;GO:0017148;GO:0030371;GO:0045931;GO:0000082;GO:0031929	K07205-ko03013 RNA transport;ko04012 ErbB signaling pathway;ko04066 HIF-1 signaling pathway;ko04151 PI3K-Akt signaling pathway;ko04152 AMPK signaling pathway;ko04150 mTOR signaling pathway;ko04910 Insulin signaling pathway;ko04211 Longevity regulating pathway - mammal;ko05231 Choline metabolism in cancer;ko05221 Acute myeloid leukemia;ko01521 EGFR tyrosine kinase inhibitor resistance	-
ENSG00000127540	183.156	102.461	0.837992	3.33682e-175	8.89504e-174	-	UQCR11	ubiquinol-cytochrome c reductase, complex III subunit XI [Source:HGNC Symbol;Acc:HGNC:30862]	GO:1902600;GO:0005739;GO:0005743;GO:0055114;GO:0016021;GO:0016020;GO:0070469;GO:0009055;GO:0008121;GO:0006091;GO:0006122	K00420-ko00190 Oxidative phosphorylation;ko04260 Cardiac muscle contraction;ko05010 Alzheimer's disease;ko05012 Parkinson's disease;ko05016 Huntington's disease;ko04932 Non-alcoholic fatty liver disease (NAFLD)	-
ENSG00000066279	0.366463	4.6661	-3.67048	3.5912e-175	9.55821e-174	-	ASPM	abnormal spindle microtubule assembly [Source:HGNC Symbol;Acc:HGNC:19048]	GO:0097431;GO:0072687;GO:0030496;GO:0005874;GO:0005737;GO:0000922;GO:0097150;GO:0090306;GO:0090263;GO:0051661;GO:0051445;GO:0048589;GO:0048477;GO:0045769;GO:0045665;GO:0021987;GO:0021873;GO:0008584;GO:0007420;GO:0007283;GO:0002052;GO:0001764;GO:0005516;GO:0051301;GO:0005634;GO:0007049;GO:0005856;GO:0005819;GO:0007051;GO:0051653;GO:0036449	-	KOG0165-Microtubule-associated protein Asp[Z]
ENSG00000114416	1.36265	22.0566	-4.01673	2.51881e-174	6.6935e-173	down	FXR1	FMR1 autosomal homolog 1 [Source:HGNC Symbol;Acc:HGNC:4023]	GO:0048471;GO:0043197;GO:0043034;GO:0035770;GO:0030425;GO:0030424;GO:0005844;GO:0005737;GO:0005634;GO:0017148;GO:0007517;GO:0003730;GO:0002151;GO:0042803;GO:0005829;GO:0016020;GO:0003723;GO:0003676;GO:0007275;GO:0030154;GO:0005515;GO:0003729;GO:2000637;GO:0006915;GO:0046982;GO:0005730;GO:0033592	K15516-ko03013 RNA transport	-
ENSG00000060491	1.80807	23.5555	-3.70354	3.16582e-174	8.39977e-173	down	OGFR	opioid growth factor receptor [Source:HGNC Symbol;Acc:HGNC:15768]	GO:0005515;GO:0016020;GO:0005737;GO:0005634;GO:0004872;GO:0038003;GO:0005575;GO:0040008;GO:0001558;GO:0004985	-	-
ENSG00000182154	264.677	166.196	0.671342	3.46715e-174	9.18499e-173	-	MRPL41	mitochondrial ribosomal protein L41 [Source:HGNC Symbol;Acc:HGNC:14492]	GO:0005739;GO:0005515;GO:0005840;GO:0030529;GO:0006412;GO:0003723;GO:0006915;GO:0003735;GO:0007049;GO:0005743;GO:0070125;GO:0070126;GO:0005762	-	KOG4756-Mitochondrial ribosomal protein L27[J]
ENSG00000047579	1.33261	31.6267	-4.56882	4.02525e-174	1.06469e-172	down	DTNBP1	dystrobrevin binding protein 1 [Source:HGNC Symbol;Acc:HGNC:17328]	GO:0043197;GO:0042383;GO:0031083;GO:0030426;GO:0030672;GO:0030424;GO:0016528;GO:0014069;GO:0005886;GO:0005789;GO:0005737;GO:0005634;GO:0060155;GO:0071901;GO:0048813;GO:0048812;GO:0048490;GO:0043506;GO:0032091;GO:0031532;GO:0014059;GO:0008089;GO:0010628;GO:0007596;GO:0006996;GO:0001956;GO:0005515;GO:0015630;GO:1904115;GO:0005783;GO:0016020;GO:0030496;GO:0030054;GO:0045202;GO:0045211;GO:0030659;GO:…	-	-
ENSG00000068878	34.2428	6.18263	2.46951	4.64487e-174	1.22668e-172	up	PSME4	proteasome activator subunit 4 [Source:HGNC Symbol;Acc:HGNC:20635]	GO:1990111;GO:0005829;GO:0005634;GO:0035093;GO:0010499;GO:0006974;GO:0006281;GO:0070577;GO:0016504;GO:0000502;GO:0005515;GO:0005654;GO:0016607;GO:0005737;GO:0007275;GO:0030154;GO:0007283;GO:0038095;GO:0010952;GO:0000165;GO:0000209;GO:0002223;GO:0002479;GO:0006521;GO:0010972;GO:0016579;GO:0031145;GO:0031146;GO:0033209;GO:0038061;GO:0043161;GO:0043488;GO:0050852;GO:0051437;GO:0055085;GO:0060071;GO:…	K06699-ko03050 Proteasome	KOG1851-Uncharacterized conserved protein[S]
ENSG00000128973	0.235311	17.6109	-6.22576	7.75911e-174	2.04595e-172	down	CLN6	ceroid-lipofuscinosis, neuronal 6, late infantile, variant [Source:HGNC Symbol;Acc:HGNC:2077]	GO:0044265;GO:0031987;GO:0007040;GO:0007601;GO:0042803;GO:0005789;GO:0005783;GO:0016021;GO:0016020;GO:0008203;GO:0030203;GO:0005788;GO:0005515;GO:0030163;GO:0045862;GO:0007042;GO:0001573	-	-
ENSG00000122786	1.56132	16.6203	-3.41211	1.16671e-173	3.07166e-172	down	CALD1	caldesmon 1 [Source:HGNC Symbol;Acc:HGNC:1441]	GO:0005515;GO:0015629;GO:0005886;GO:0003779;GO:0043231;GO:0005737;GO:0005856;GO:0005516;GO:0017022;GO:0006936;GO:0005829;GO:0045296;GO:0030016;GO:0006928;GO:0005523;GO:0030478;GO:0016020	K12327-ko04270 Vascular smooth muscle contraction	-
ENSG00000126432	559.774	418.662	0.419061	1.26021e-173	3.31271e-172	-	PRDX5	peroxiredoxin 5 [Source:HGNC Symbol;Acc:HGNC:9355]	GO:0034599;GO:0005739;GO:0045454;GO:0005829;GO:0043231;GO:0055114;GO:0016491;GO:0005737;GO:0005634;GO:0048471;GO:0005615;GO:0031410;GO:0098869;GO:0006954;GO:0005777;GO:0004601;GO:0070062;GO:0005759;GO:0005102;GO:0043066;GO:0006979;GO:0043027;GO:0043154;GO:0046983;GO:0016209;GO:0006915;GO:0034614;GO:0051920;GO:0001016;GO:0008379;GO:0016480	K11187-ko04146 Peroxisome	KOG0541-Alkyl hydroperoxide reductase/peroxiredoxin[O]
ENSG00000065000	4.01291	25.5343	-2.66971	1.42136e-173	3.73059e-172	down	AP3D1	adaptor related protein complex 3 delta 1 subunit [Source:HGNC Symbol;Acc:HGNC:568]	GO:1904115;GO:0005765;GO:0005794;GO:0030117;GO:0016192;GO:0015031;GO:0006886;GO:0016020;GO:0005737;GO:0006810;GO:0000139;GO:0005886;GO:0030123;GO:0010008;GO:0005215;GO:0008089;GO:0048490;GO:0006726;GO:0032438;GO:0035646;GO:0061088;GO:0072657;GO:0098830;GO:0043195;GO:0030424;GO:0098943;GO:0051138;GO:0048499;GO:0048007;GO:0033365;GO:0019882;GO:0016182	K12396-ko04142 Lysosome	KOG1059-Vesicle coat complex AP-3, delta subunit[U]
ENSG00000100003	15.1585	3.48914	2.11918	1.45494e-173	3.81283e-172	up	SEC14L2	SEC14 like lipid binding 2 [Source:HGNC Symbol;Acc:HGNC:10699]	GO:0005622;GO:0006355;GO:0006351;GO:0005829;GO:0005634;GO:0005215;GO:0006810;GO:0016021;GO:0005737;GO:0045893;GO:0008289;GO:0070062;GO:0005543;GO:0008431;GO:0045540	-	KOG1471-Phosphatidylinositol transfer protein SEC14 and related proteins[I]
ENSG00000069345	0.948395	15.179	-4.00045	1.62341e-173	4.2478e-172	down	DNAJA2	DnaJ heat shock protein family (Hsp40) member A2 [Source:HGNC Symbol;Acc:HGNC:14884]	GO:0005515;GO:0006457;GO:0005829;GO:0005524;GO:0046872;GO:0016020;GO:0032781;GO:0051082;GO:0031072;GO:0009408;GO:0070062;GO:0051087;GO:0008284;GO:0001671;GO:0042026	K09503-ko04141 Protein processing in endoplasmic reticulum	KOG0712-Molecular chaperone (DnaJ superfamily)[O]
ENSG00000160299	6.57855	21.9511	-1.73845	1.96975e-173	5.14613e-172	down	PCNT	pericentrin [Source:HGNC Symbol;Acc:HGNC:16068]	GO:0005515;GO:0005813;GO:0005829;GO:0016020;GO:0005737;GO:0005815;GO:0005856;GO:0005874;GO:0005516;GO:0000086;GO:0097711;GO:0000226;GO:0060271;GO:0007052;GO:0090316;GO:0034451;GO:0005814	-	-
ENSG00000134824	9.38673	28.5755	-1.60608	2.17103e-173	5.66329e-172	down	FADS2	fatty acid desaturase 2 [Source:HGNC Symbol;Acc:HGNC:3575]	GO:0006633;GO:0006631;GO:0006629;GO:0005789;GO:0005783;GO:0055114;GO:0016491;GO:0016021;GO:0016020;GO:0006636;GO:0005887;GO:0036109;GO:0043651;GO:0016213;GO:0004768	K10226-ko01212 Fatty acid metabolism;ko00592 alpha-Linolenic acid metabolism;ko01040 Biosynthesis of unsaturated fatty acids;ko03320 PPAR signaling pathway	KOG4232-Delta 6-fatty acid desaturase/delta-8 sphingolipid desaturase[I]
ENSG00000254999	334.469	224.256	0.576724	2.41053e-173	6.27843e-172	-	BRK1	BRICK1, SCAR/WAVE actin nucleating complex subunit [Source:HGNC Symbol;Acc:HGNC:23057]	GO:0030027;GO:0048870;GO:0030036;GO:0008284;GO:0001701;GO:0032403;GO:0005515;GO:0007015;GO:0005737;GO:0005856;GO:0038096;GO:0005829;GO:0070062;GO:0048010;GO:0010592;GO:0048365;GO:0070207;GO:0016601;GO:0031209;GO:2000601	K05752-ko04810 Regulation of actin cytoskeleton	-
ENSG00000235253	1.03902	34.8084	-5.06614	2.69556e-173	7.01011e-172	down	AC010240.2	-	-	-	-
ENSG00000168653	858.008	595.075	0.52792	2.98594e-173	7.75342e-172	-	NDUFS5	NADH:ubiquinone oxidoreductase subunit S5 [Source:HGNC Symbol;Acc:HGNC:7712]	GO:0005739;GO:0005743;GO:0055114;GO:0016020;GO:0070469;GO:0005758;GO:0032981;GO:0008137;GO:0006120;GO:0005747	K03938-ko00190 Oxidative phosphorylation;ko05010 Alzheimer's disease;ko05012 Parkinson's disease;ko05016 Huntington's disease;ko04932 Non-alcoholic fatty liver disease (NAFLD)	KOG4110-NADH:ubiquinone oxidoreductase, NDUFS5/15kDa[C]
ENSG00000159176	88.208	49.7417	0.826454	4.41674e-173	1.14513e-171	-	CSRP1	cysteine and glycine rich protein 1 [Source:HGNC Symbol;Acc:HGNC:2469]	GO:0046872;GO:0008270;GO:0005634;GO:0003723;GO:0005925;GO:0070062;GO:0070527	-	-
ENSG00000114395	28.0193	0.514267	5.76776	5.04373e-173	1.3057e-171	up	CYB561D2	cytochrome b561 family member D2 [Source:HGNC Symbol;Acc:HGNC:30253]	GO:0055114;GO:0046872;GO:0016021;GO:0016020	-	-
ENSG00000099364	2.72472	18.2157	-2.74101	6.19125e-173	1.60033e-171	down	FBXL19	F-box and leucine rich repeat protein 19 [Source:HGNC Symbol;Acc:HGNC:25300]	GO:0003677;GO:0008270;GO:0046872;GO:0043161;GO:0005515;GO:0005829;GO:0000209;GO:0004842;GO:0043687;GO:0019005	-	KOG1633-F-box protein JEMMA and related proteins with JmjC, PHD, F-box and LRR domains[B]
ENSG00000178307	17.5316	0.433705	5.3371	7.85679e-172	2.02777e-170	up	TMEM11	transmembrane protein 11 [Source:HGNC Symbol;Acc:HGNC:16823]	GO:0005739;GO:0031305;GO:0005515;GO:0005743;GO:0016021;GO:0016020;GO:0005887;GO:0007005;GO:0003674	-	-
ENSG00000169057	1.08315	11.2695	-3.37911	1.29261e-171	3.33107e-170	down	MECP2	methyl-CpG binding protein 2 [Source:HGNC Symbol;Acc:HGNC:6990]	GO:0090063;GO:0007052;GO:0005813;GO:0000930;GO:0010971;GO:0008284;GO:0045892;GO:0005515;GO:0000122;GO:0006355;GO:0006351;GO:0003677;GO:0005634;GO:0003723;GO:0005615;GO:0010385;GO:0042826;GO:0005739;GO:0098794;GO:0047485;GO:0019904;GO:0003714;GO:0000792;GO:0005829;GO:0005737;GO:2000820;GO:1900114;GO:0060291;GO:0060079;GO:0051151;GO:0051965;GO:0050905;GO:0050432;GO:0050884;GO:0048167;GO:0046470;GO:…	-	KOG4161-Methyl-CpG binding transcription regulators[KB]
ENSG00000130305	55.0733	13.9895	1.97701	2.24673e-171	5.78108e-170	up	NSUN5	NOP2/Sun RNA methyltransferase family member 5 [Source:HGNC Symbol;Acc:HGNC:16385]	GO:0032259;GO:0016740;GO:0008168;GO:0005730;GO:0005634;GO:0003723;GO:0006364;GO:0070475;GO:0008757;GO:0008173	-	KOG2360-Proliferation-associated nucleolar protein (NOL1)[D]
ENSG00000115307	85.9857	39.2319	1.13207	3.35056e-171	8.60837e-170	up	AUP1	ancient ubiquitous protein 1 [Source:HGNC Symbol;Acc:HGNC:891]	GO:0005515;GO:0050790;GO:0005789;GO:0005783;GO:0016021;GO:0016020;GO:0030970;GO:0070062;GO:0030176;GO:0043130;GO:0030433;GO:0097027;GO:0000839	-	-
ENSG00000132432	22.9112	147.315	-2.68478	1.26156e-170	3.23635e-169	down	SEC61G	Sec61 translocon gamma subunit [Source:HGNC Symbol;Acc:HGNC:18277]	GO:0005515;GO:0005622;GO:0071806;GO:0015450;GO:0006605;GO:0005789;GO:0005783;GO:0016020;GO:0015031;GO:0006886;GO:0016021;GO:0006810;GO:0005829;GO:0008565;GO:0036498;GO:0045047	K07342-ko03060 Protein export;ko04141 Protein processing in endoplasmic reticulum;ko04145 Phagosome;ko05110 Vibrio cholerae infection	KOG3498-Preprotein translocase, gamma subunit[U]
ENSG00000160208	0.694866	10.3274	-3.8936	3.58368e-170	9.17962e-169	down	RRP1B	ribosomal RNA processing 1B [Source:HGNC Symbol;Acc:HGNC:23818]	GO:0005634;GO:0000792;GO:0000791;GO:0005829;GO:0005730;GO:0003723;GO:0006364;GO:0030687;GO:0010923;GO:0030688	-	KOG3911-Nucleolar protein NOP52/RRP1[A]
ENSG00000085760	1.0763	18.5306	-4.10576	5.32496e-170	1.36194e-168	down	MTIF2	mitochondrial translational initiation factor 2 [Source:HGNC Symbol;Acc:HGNC:7441]	GO:0003924;GO:0005739;GO:0005525;GO:0005622;GO:0005654;GO:0000166;GO:0006413;GO:0006412;GO:0003743;GO:0003723;GO:0008135;GO:0006446;GO:0043024;GO:0032790;GO:0070124	-	KOG1145-Mitochondrial translation initiation factor 2 (IF-2; GTPase)[J]
ENSG00000120438	5.91306	30.0699	-2.34634	9.55001e-170	2.4389e-168	down	TCP1	t-complex 1 [Source:HGNC Symbol;Acc:HGNC:11655]	GO:0044297;GO:0043209;GO:0005832;GO:0005815;GO:0005794;GO:0005720;GO:0002199;GO:0001669;GO:0000792;GO:0000242;GO:2000109;GO:1901998;GO:0044053;GO:0007339;GO:0005515;GO:0006457;GO:0005524;GO:0000166;GO:0005737;GO:0003723;GO:0005856;GO:0005874;GO:0051082;GO:0061077;GO:0005829;GO:0070062;GO:0050821;GO:0032212;GO:0051973;GO:0005813;GO:0031625;GO:1904851;GO:1904874;GO:0044183;GO:0006458;GO:0007021;GO:…	-	KOG0360-Chaperonin complex component, TCP-1 alpha subunit (CCT1)[O]
ENSG00000167258	3.50436	13.8315	-1.98073	3.32353e-169	8.475e-168	down	CDK12	cyclin dependent kinase 12 [Source:HGNC Symbol;Acc:HGNC:24224]	GO:0006468;GO:0005524;GO:0004672;GO:0001650;GO:0016310;GO:0016301;GO:0016740;GO:0005634;GO:0004674;GO:0000166;GO:0016607;GO:0008380;GO:0006397;GO:0051726;GO:0005515;GO:0008134;GO:0045944;GO:0005654;GO:0006368;GO:0043405;GO:0044212;GO:0002944;GO:0046777;GO:0005694;GO:0004693;GO:0008353;GO:0030332;GO:0070816;GO:0008024;GO:0019908;GO:2000737;GO:0043484;GO:0019901	-	KOG0600-Cdc2-related protein kinase[D]
ENSG00000182512	3.94433	37.8047	-3.26072	4.50032e-169	1.14587e-167	down	GLRX5	glutaredoxin 5 [Source:HGNC Symbol;Acc:HGNC:20134]	GO:0043025;GO:0030425;GO:0005739;GO:0005634;GO:0055114;GO:0045454;GO:0046872;GO:0005759;GO:0051536;GO:0009249;GO:0009055;GO:0015035;GO:0051537;GO:0030097;GO:0044281	-	KOG0911-Glutaredoxin-related protein[O]
ENSG00000103326	7.75863	21.3418	-1.45981	1.66539e-168	4.23407e-167	down	CAPN15	calpain 15 [Source:HGNC Symbol;Acc:HGNC:11182]	GO:0046872;GO:0008270;GO:0006508;GO:0008234;GO:0008233;GO:0005622;GO:0016787;GO:0004198;GO:0006355;GO:0005737;GO:0003700	-	KOG0045-Cytosolic Ca2+-dependent cysteine protease (calpain), large subunit (EF-Hand protein superfamily)[OT]
ENSG00000126787	0.345798	13.5628	-5.29358	2.35097e-167	5.96818e-166	down	DLGAP5	DLG associated protein 5 [Source:HGNC Symbol;Acc:HGNC:16864]	GO:0005515;GO:0004721;GO:0005739;GO:0005829;GO:0005737;GO:0005634;GO:0007049;GO:0005815;GO:0005856;GO:0006470;GO:0005819;GO:0023052;GO:0008283;GO:0031616;GO:0045842;GO:0007079	-	KOG3971-SAP-90/PSD-95 associated protein-related protein (Vulcan)[T]
ENSG00000117676	1.1407	16.0176	-3.81167	2.59622e-167	6.58095e-166	down	RPS6KA1	ribosomal protein S6 kinase A1 [Source:HGNC Symbol;Acc:HGNC:10430]	GO:0005515;GO:0035556;GO:0016310;GO:0016301;GO:0000287;GO:0016740;GO:0005829;GO:0005634;GO:0006468;GO:0005524;GO:0004674;GO:0000166;GO:0004672;GO:0046872;GO:0005737;GO:0007049;GO:0005654;GO:0004712;GO:0043066;GO:0045944;GO:0007165;GO:0045597;GO:0030307;GO:0043154;GO:0043027;GO:0043620;GO:0006915;GO:0072574;GO:0043555;GO:2000491	K04373-ko04010 MAPK signaling pathway;ko04150 mTOR signaling pathway;ko04114 Oocyte meiosis;ko04914 Progesterone-mediated oocyte maturation;ko04720 Long-term potentiation;ko04722 Neurotrophin signaling pathway;ko04931 Insulin resistance	KOG0598-Ribosomal protein S6 kinase and related proteins[RT]
ENSG00000204922	169.565	107.493	0.657603	2.81163e-167	7.11638e-166	-	UQCC3	ubiquinol-cytochrome c reductase complex assembly factor 3 [Source:HGNC Symbol;Acc:HGNC:34399]	GO:0031305;GO:0005739;GO:0005743;GO:0016021;GO:0016020;GO:0006754;GO:0042407;GO:0006122;GO:0005750;GO:1901612;GO:0070300;GO:0034551;GO:0097033	-	-
ENSG00000100027	8.21527	0.156245	5.71643	4.70838e-167	1.18995e-165	up	YPEL1	yippee like 1 [Source:HGNC Symbol;Acc:HGNC:12845]	GO:0046872;GO:0005634	-	KOG3399-Predicted Yippee-type zinc-binding protein[R]
ENSG00000169714	2.76503	34.357	-3.63524	4.91062e-167	1.23922e-165	down	CNBP	CCHC-type zinc finger nucleic acid binding protein [Source:HGNC Symbol;Acc:HGNC:13164]	GO:0005515;GO:0005829;GO:0006355;GO:0006351;GO:0003677;GO:0005783;GO:0046872;GO:0008270;GO:0005737;GO:0005634;GO:0003723;GO:0003676;GO:0045893;GO:0000122;GO:0045944;GO:0008284;GO:0003700;GO:0000977;GO:0006695;GO:0001227;GO:0003727;GO:0003697	-	KOG4400-E3 ubiquitin ligase interacting with arginine methyltransferase[O]
ENSG00000067900	0.365789	5.62547	-3.94289	6.11287e-167	1.54033e-165	down	ROCK1	Rho associated coiled-coil containing protein kinase 1 [Source:HGNC Symbol;Acc:HGNC:10251]	GO:0030027;GO:0005886;GO:0005856;GO:0001726;GO:0051894;GO:0051451;GO:0043524;GO:0032970;GO:0032060;GO:0030036;GO:0003383;GO:0005515;GO:0005794;GO:0035556;GO:0016310;GO:0016301;GO:0016740;GO:0006468;GO:0005524;GO:0004674;GO:0000166;GO:0004672;GO:0046872;GO:0016020;GO:0005737;GO:0006915;GO:0000139;GO:0042995;GO:0005576;GO:0051492;GO:0051493;GO:0007266;GO:0017048;GO:0017049;GO:2000114;GO:0005829;GO:…	K04514-ko04350 TGF-beta signaling pathway;ko04071 Sphingolipid signaling pathway;ko04024 cAMP signaling pathway;ko04022 cGMP - PKG signaling pathway;ko04810 Regulation of actin cytoskeleton;ko04510 Focal adhesion;ko04611 Platelet activation;ko04670 Leukocyte transendothelial migration;ko04062 Chemokine signaling pathway;ko04921 Oxytocin signaling pathway;ko04270 Vascular smooth muscle contraction…	KOG0612-Rho-associated, coiled-coil containing protein kinase[T]
ENSG00000107021	1.81159	14.7998	-3.03025	1.3846e-166	3.4838e-165	down	TBC1D13	TBC1 domain family member 13 [Source:HGNC Symbol;Acc:HGNC:25571]	GO:0016020;GO:0005829;GO:0006886;GO:0017137;GO:0005096;GO:0043547;GO:0005737;GO:0031338;GO:0090630;GO:0005622;GO:0012505	-	KOG4567-GTPase-activating protein[R]
ENSG00000126001	5.08474	23.8004	-2.22674	1.39618e-166	3.50774e-165	down	CEP250	centrosomal protein 250 [Source:HGNC Symbol;Acc:HGNC:1859]	GO:0005814;GO:0005515;GO:0005813;GO:0005737;GO:0007049;GO:0048471;GO:0005856;GO:0042995;GO:0005815;GO:0005929;GO:0005829;GO:0070062;GO:0000086;GO:0097711;GO:0008022;GO:0019904;GO:0043234;GO:0019901;GO:0000278;GO:0008104;GO:0030997;GO:0033365;GO:0010457;GO:1905515;GO:1904781	-	-
ENSG00000177410	230.44	352.615	-0.613702	3.21215e-166	8.05828e-165	-	ZFAS1	ZNFX1 antisense RNA 1 [Source:HGNC Symbol;Acc:HGNC:33101]	-	-	-
ENSG00000111206	19.8415	30.2824	-0.609955	9.48937e-166	2.37709e-164	-	FOXM1	forkhead box M1 [Source:HGNC Symbol;Acc:HGNC:3818]	GO:0005515;GO:0043565;GO:0006355;GO:0006351;GO:0003700;GO:0003677;GO:0005634;GO:0007049;GO:0006281;GO:0006974;GO:0045893;GO:0045944;GO:0005654;GO:0008284;GO:0000981;GO:0000086;GO:0000122;GO:0045892;GO:0019901;GO:0051726;GO:0032873;GO:0006978;GO:0046578;GO:0071156;GO:0090344;GO:2000377;GO:2000781	-	KOG2294-Transcription factor of the Forkhead/HNF3 family[K]
ENSG00000008952	3.69453	48.3932	-3.71134	1.13765e-165	2.84563e-164	down	SEC62	SEC62 homolog, preprotein translocation factor [Source:HGNC Symbol;Acc:HGNC:11846]	GO:0005789;GO:0005783;GO:0015031;GO:0008565;GO:0016021;GO:0016020;GO:0006810;GO:0005829;GO:0004872;GO:0036498;GO:0005791;GO:0006613;GO:0006620	K12275-ko03060 Protein export;ko04141 Protein processing in endoplasmic reticulum	KOG2927-Membrane component of ER protein translocation complex[U]
ENSG00000105197	73.8093	40.5702	0.863383	1.63661e-165	4.08768e-164	-	TIMM50	translocase of inner mitochondrial membrane 50 [Source:HGNC Symbol;Acc:HGNC:23656]	GO:0005515;GO:0005744;GO:0005743;GO:0005739;GO:0035335;GO:0005654;GO:0015031;GO:0016021;GO:0016020;GO:0016607;GO:0005634;GO:0006810;GO:0003723;GO:0004725;GO:0043021;GO:0006470;GO:0030150;GO:0004722;GO:0007006;GO:0005134;GO:0004721;GO:0001836	-	KOG2832-TFIIF-interacting CTD phosphatase, including NLI-interacting factor (involved in RNA polymerase II regulation)[K]
ENSG00000117174	0.738427	12.5206	-4.0837	2.68267e-165	6.69057e-164	down	ZNHIT6	zinc finger HIT-type containing 6 [Source:HGNC Symbol;Acc:HGNC:26089]	GO:0005515;GO:0046872;GO:0070062;GO:0042254;GO:0019899;GO:0051259;GO:0070761;GO:0042802;GO:0051117;GO:0001094;GO:0048254;GO:0000492	-	KOG2858-Uncharacterized conserved protein[R]
ENSG00000214753	12.1442	37.2389	-1.61654	1.98068e-164	4.93259e-163	down	HNRNPUL2	heterogeneous nuclear ribonucleoprotein U like 2 [Source:HGNC Symbol;Acc:HGNC:25451]	GO:0005654;GO:0016020;GO:0005634;GO:0003723;GO:0008150	-	-
ENSG00000104408	11.6139	65.031	-2.48527	8.71248e-164	2.16655e-162	down	EIF3E	eukaryotic translation initiation factor 3 subunit E [Source:HGNC Symbol;Acc:HGNC:3277]	GO:0016604;GO:0005829;GO:0005852;GO:0003743;GO:0005737;GO:0006413;GO:0005515;GO:0006446;GO:0006412;GO:0016020;GO:0005634;GO:0003723;GO:0005654;GO:0045296;GO:0070062;GO:0047485;GO:0000785;GO:0016605;GO:0000184;GO:0045727;GO:1902416;GO:0045947;GO:0033290;GO:0016282;GO:0001731	K03250-ko03013 RNA transport;ko05160 Hepatitis C	KOG2758-Translation initiation factor 3, subunit e (eIF-3e)[J]
ENSG00000148450	67.1261	32.7268	1.0364	6.43522e-163	1.59792e-161	up	MSRB2	methionine sulfoxide reductase B2 [Source:HGNC Symbol;Acc:HGNC:17061]	GO:0005739;GO:0030091;GO:0030041;GO:0033743;GO:0008270;GO:0003779;GO:0055114;GO:0016491;GO:0046872;GO:0006355;GO:0006979;GO:0016671;GO:0005829;GO:0003700	-	KOG0856-Predicted pilin-like transcription factor[O]
ENSG00000143870	2.51903	20.919	-3.05387	1.0563e-162	2.61906e-161	down	PDIA6	protein disulfide isomerase family A member 6 [Source:HGNC Symbol;Acc:HGNC:30168]	GO:0015037;GO:0042470;GO:0005515;GO:0055114;GO:0005886;GO:0045454;GO:0016853;GO:0005783;GO:0005829;GO:0016020;GO:0005615;GO:0003756;GO:0005788;GO:0005789;GO:0070062;GO:0044267;GO:0036498;GO:0005793;GO:0006457;GO:0043687;GO:0034976;GO:0043277;GO:0034663	K09584-ko04141 Protein processing in endoplasmic reticulum	KOG0191-Thioredoxin/protein disulfide isomerase[O]
ENSG00000139624	19.5542	5.55867	1.81467	5.01074e-162	1.24059e-160	up	CERS5	ceramide synthase 5 [Source:HGNC Symbol;Acc:HGNC:23749]	GO:0005783;GO:0003677;GO:0016021;GO:0016020;GO:0005634;GO:0046513;GO:0030148;GO:0050291;GO:0006629;GO:0005789;GO:0016740;GO:0006665;GO:0031965	K04710-ko00600 Sphingolipid metabolism;ko04071 Sphingolipid signaling pathway	KOG1607-Protein transporter of the TRAM (translocating chain-associating membrane) superfamily[U]
ENSG00000144674	0.350343	7.91138	-4.49709	1.47956e-161	3.65788e-160	down	GOLGA4	golgin A4 [Source:HGNC Symbol;Acc:HGNC:4427]	GO:0005515;GO:0005794;GO:0005829;GO:0043231;GO:0016020;GO:0005737;GO:0000139;GO:0045773;GO:0070062;GO:0000042;GO:0016192;GO:0005802;GO:0051020;GO:0043001	-	-
ENSG00000165119	17.5389	63.9612	-1.86664	1.78879e-161	4.41598e-160	down	HNRNPK	heterogeneous nuclear ribonucleoprotein K [Source:HGNC Symbol;Acc:HGNC:5044]	GO:0016070;GO:0005681;GO:0005515;GO:0030529;GO:0006355;GO:0006351;GO:0003677;GO:0006357;GO:0006366;GO:0005654;GO:0016020;GO:0005737;GO:0005634;GO:0008380;GO:0006397;GO:0006396;GO:0003723;GO:0003676;GO:0030054;GO:0005925;GO:0042995;GO:0045296;GO:0070062;GO:0002102;GO:0031012;GO:0016032;GO:0000398;GO:0045944;GO:0007165;GO:0000790;GO:0048260;GO:0000978;GO:0071013;GO:0001077;GO:0043066;GO:0003697;GO:…	K12886-ko03040 Spliceosome;ko05206 MicroRNAs in cancer;ko05203 Viral carcinogenesis;ko05168 Herpes simplex infection	KOG2192-PolyC-binding hnRNP-K protein HRB57A/hnRNP, contains KH domain[AR]
ENSG00000105193	839.063	472.693	0.827875	1.8953e-161	4.67214e-160	-	RPS16	ribosomal protein S16 [Source:HGNC Symbol;Acc:HGNC:10396]	GO:0005840;GO:0006412;GO:0003735;GO:0030529;GO:0005515;GO:0016020;GO:0003723;GO:0022627;GO:0005925;GO:0006364;GO:0042274;GO:0000462;GO:0005829;GO:0070062;GO:0005654;GO:0031012;GO:0006413;GO:0000184;GO:0019083;GO:0006614;GO:0015935	K02960-ko03010 Ribosome	KOG1753-40S ribosomal protein S16[J]
ENSG00000129226	0.537713	20.516	-5.25377	1.93538e-161	4.76406e-160	down	CD68	CD68 molecule [Source:HGNC Symbol;Acc:HGNC:1693]	GO:0071310;GO:0005886;GO:0005765;GO:0016020;GO:0016021;GO:0005764;GO:0005768;GO:0010008;GO:0043312;GO:0035577	K06501-ko04142 Lysosome	KOG4818-Lysosomal-associated membrane protein[R]
ENSG00000134308	7.33305	37.7668	-2.36463	2.95462e-161	7.26249e-160	down	YWHAQ	tyrosine 3-monooxygenase/tryptophan 5-monooxygenase activation protein theta [Source:HGNC Symbol;Acc:HGNC:12854]	GO:0043234;GO:0034766;GO:0007264;GO:0006605;GO:0071889;GO:0047485;GO:0044325;GO:0019904;GO:0008022;GO:0005515;GO:0016020;GO:0005737;GO:0005925;GO:0005739;GO:0005829;GO:0070062;GO:0061024;GO:0021762;GO:0045892;GO:1900740;GO:0030659	K16197-ko04013 MAPK signaling pathway - fly;ko04390 Hippo signaling pathway;ko04391 Hippo signaling pathway -fly;ko04151 PI3K-Akt signaling pathway;ko04110 Cell cycle;ko04114 Oocyte meiosis;ko04212 Longevity regulating pathway - worm;ko05203 Viral carcinogenesis;ko05161 Hepatitis B;ko05169 Epstein-Barr virus infection	KOG0841-Multifunctional chaperone (14-3-3 family)[O]
ENSG00000115233	0.766314	21.7573	-4.82742	4.67594e-161	1.14769e-159	down	PSMD14	proteasome 26S subunit, non-ATPase 14 [Source:HGNC Symbol;Acc:HGNC:16889]	GO:0022624;GO:0031597;GO:0000502;GO:0045471;GO:0006508;GO:0008233;GO:0005515;GO:0016787;GO:0046872;GO:0005634;GO:0006511;GO:0006281;GO:0006974;GO:0008237;GO:0038095;GO:0005576;GO:0005829;GO:0070062;GO:0000165;GO:0000209;GO:0002223;GO:0002479;GO:0006521;GO:0010972;GO:0016579;GO:0031145;GO:0031146;GO:0033209;GO:0038061;GO:0043161;GO:0043488;GO:0050852;GO:0051437;GO:0055085;GO:0060071;GO:0061418;GO:…	K03030-ko03050 Proteasome;ko05169 Epstein-Barr virus infection	KOG1555-26S proteasome regulatory complex, subunit RPN11[O]
ENSG00000276168	8502.33	11058.9	-0.379282	1.03177e-159	2.52881e-158	-	RN7SL1	RNA, 7SL, cytoplasmic 1 [Source:HGNC Symbol;Acc:HGNC:10038]	-	-	-
ENSG00000011260	6.09619	49.9944	-3.03579	4.9899e-159	1.22124e-157	down	UTP18	UTP18, small subunit processome component [Source:HGNC Symbol;Acc:HGNC:24274]	GO:0031965;GO:0005730;GO:0005634;GO:0003723;GO:0006364;GO:0000462;GO:0032040;GO:0034388;GO:0005654;GO:0016021;GO:0016020	K14553-ko03008 Ribosome biogenesis in eukaryotes	KOG2055-WD40 repeat protein[R]
ENSG00000079819	2.02411	18.0931	-3.16008	5.18181e-159	1.26638e-157	down	EPB41L2	erythrocyte membrane protein band 4.1 like 2 [Source:HGNC Symbol;Acc:HGNC:3379]	GO:0001558;GO:0005856;GO:0005911;GO:0005198;GO:0005886;GO:0003779;GO:0007010;GO:0007016;GO:0019898;GO:0008092;GO:0030054;GO:0005654;GO:0005634;GO:0016020;GO:0005737;GO:0005925;GO:0030866;GO:0005829;GO:0070062;GO:0005200;GO:0031032;GO:0008180;GO:0008091;GO:0042731;GO:0030507	K06107-ko04530 Tight junction	KOG3527-Erythrocyte membrane protein 4.1 and related proteins of the ERM family[R]
ENSG00000127314	0.760408	20.926	-4.78238	5.65401e-159	1.37981e-157	down	RAP1B	RAP1B, member of RAS oncogene family [Source:HGNC Symbol;Acc:HGNC:9857]	GO:0003924;GO:0005515;GO:0005886;GO:0005829;GO:0005525;GO:0007165;GO:0005622;GO:0000166;GO:0016020;GO:0005737;GO:0030054;GO:2000114;GO:0070062;GO:0043312;GO:0019003;GO:0032403;GO:0061028;GO:0035577;GO:0005911;GO:0005811;GO:0071320;GO:0032486;GO:1901888	K07836-ko04014 Ras signaling pathway;ko04015 Rap1 signaling pathway;ko04010 MAPK signaling pathway;ko04024 cAMP signaling pathway;ko04510 Focal adhesion;ko04611 Platelet activation;ko04670 Leukocyte transendothelial migration;ko04062 Chemokine signaling pathway;ko04972 Pancreatic secretion;ko04720 Long-term potentiation;ko04722 Neurotrophin signaling pathway;ko05211 Renal cell carcinoma	KOG0395-Ras-related GTPase[R]
ENSG00000136450	2.87318	29.6352	-3.36659	9.95934e-159	2.427e-157	down	SRSF1	serine and arginine rich splicing factor 1 [Source:HGNC Symbol;Acc:HGNC:10780]	GO:0044547;GO:0005681;GO:0005515;GO:0016607;GO:0005737;GO:0005634;GO:0051028;GO:0006810;GO:0008380;GO:0006397;GO:0003723;GO:0003676;GO:0005654;GO:0000395;GO:0070062;GO:0000398;GO:0006369;GO:0006405;GO:0031124;GO:0035145;GO:0006406;GO:0071013;GO:0003729;GO:0000380;GO:0006376;GO:0097421;GO:0060048;GO:0048709;GO:0033120;GO:0001701;GO:0050733;GO:0043422	K12890-ko03040 Spliceosome;ko05168 Herpes simplex infection	KOG0105-Alternative splicing factor ASF/SF2 (RRM superfamily)[A]
ENSG00000092010	47.1025	162.622	-1.78765	1.37511e-158	3.34622e-157	down	PSME1	proteasome activator subunit 1 [Source:HGNC Symbol;Acc:HGNC:9568]	GO:0008537;GO:0000502;GO:0005515;GO:0005737;GO:0038095;GO:0005829;GO:0070062;GO:0000165;GO:0000209;GO:0002223;GO:0002479;GO:0006521;GO:0010972;GO:0016579;GO:0031145;GO:0031146;GO:0033209;GO:0038061;GO:0043161;GO:0043488;GO:0050852;GO:0051437;GO:0055085;GO:0060071;GO:0061418;GO:0090090;GO:0090263;GO:0005654;GO:0051436;GO:0043687;GO:2000045;GO:0061133;GO:0010950;GO:0061136;GO:0019884	K06696-ko03050 Proteasome;ko04612 Antigen processing and presentation	KOG4470-Proteasome activator subunit[O]
ENSG00000162063	1.98264	13.8415	-2.8035	1.8295e-158	4.44562e-157	down	CCNF	cyclin F [Source:HGNC Symbol;Acc:HGNC:1591]	GO:0051726;GO:0010826;GO:0001890;GO:0000320;GO:0005515;GO:0030054;GO:0005813;GO:0051301;GO:0016567;GO:0005737;GO:0005634;GO:0007049;GO:0005856;GO:0005829;GO:0005814;GO:0000209;GO:0004842;GO:0043687;GO:0019005;GO:0031146	-	KOG0654-G2/Mitotic-specific cyclin A[D]
ENSG00000103257	24.6961	55.1814	-1.1599	2.06957e-158	5.02181e-157	down	SLC7A5	solute carrier family 7 member 5 [Source:HGNC Symbol;Acc:HGNC:11063]	GO:0005886;GO:0005829;GO:0016020;GO:0043231;GO:0016021;GO:0015171;GO:0003333;GO:0015807;GO:0015179;GO:1902475;GO:0005737;GO:0006810;GO:0007275;GO:0007399;GO:0030154;GO:0006865;GO:0050900;GO:0005887;GO:0070062;GO:0015297;GO:0016324;GO:0042605;GO:0006520;GO:0015804;GO:0015175	K13780-ko04150 mTOR signaling pathway;ko05230 Central carbon metabolism in cancer	KOG1287-Amino acid transporters[E]
ENSG00000163374	0.830749	13.9288	-4.06751	3.51821e-158	8.52478e-157	down	YY1AP1	YY1 associated protein 1 [Source:HGNC Symbol;Acc:HGNC:30935]	GO:0005515;GO:0001650;GO:0006355;GO:0006351;GO:0005737;GO:0005634;GO:0006281;GO:0030154;GO:0006260;GO:0008283;GO:0007050;GO:0006357;GO:0051726;GO:0031011;GO:0071559	-	-
ENSG00000107949	0.633637	29.7312	-5.55218	4.40765e-158	1.06647e-156	down	BCCIP	BRCA2 and CDKN1A interacting protein [Source:HGNC Symbol;Acc:HGNC:978]	GO:0005515;GO:0005654;GO:0005829;GO:0005634;GO:0003723;GO:0007049;GO:0006281;GO:0006974;GO:0000079;GO:0061101;GO:0019207;GO:0019908	-	KOG3034-Isoamyl acetate-hydrolyzing esterase and related enzymes[R]
ENSG00000151461	1.88507	11.6904	-2.63263	8.63341e-158	2.08598e-156	down	UPF2	UPF2 regulator of nonsense transcripts homolog (yeast) [Source:HGNC Symbol;Acc:HGNC:17854]	GO:0031100;GO:0001889;GO:0005515;GO:0005829;GO:0005737;GO:0003723;GO:0048471;GO:0000932;GO:0005634;GO:0035145;GO:0000184;GO:0042162;GO:0005844;GO:0006406	K14327-ko03013 RNA transport;ko03015 mRNA surveillance pathway	KOG2051-Nonsense-mediated mRNA decay 2 protein[A]
ENSG00000111011	0.141467	17.2679	-6.93148	1.35027e-157	3.25786e-156	down	RSRC2	arginine and serine rich coiled-coil 2 [Source:HGNC Symbol;Acc:HGNC:30559]	GO:0003723	-	-
ENSG00000143549	15.7729	63.0015	-1.99794	1.58858e-157	3.82741e-156	down	TPM3	tropomyosin 3 [Source:HGNC Symbol;Acc:HGNC:12012]	GO:0005515;GO:0015629;GO:0003779;GO:0005829;GO:0005737;GO:0005856;GO:0003674;GO:0070062;GO:0008307;GO:0051015;GO:0007015;GO:0001725;GO:0006936;GO:0006928;GO:0030049;GO:0005862;GO:0005884	K09290-ko04260 Cardiac muscle contraction;ko04261 Adrenergic signaling in cardiomyocytes;ko05200 Pathways in cancer;ko05216 Thyroid cancer;ko05410 Hypertrophic cardiomyopathy (HCM);ko05414 Dilated cardiomyopathy (DCM)	KOG1003-Actin filament-coating protein tropomyosin[Z]
ENSG00000142192	31.7201	54.3075	-0.775757	1.89181e-157	4.55157e-156	-	APP	amyloid beta precursor protein [Source:HGNC Symbol;Acc:HGNC:620]	GO:1990812;GO:0051233;GO:0097449;GO:1990761;GO:0048471;GO:0045177;GO:0044304;GO:0043195;GO:0043005;GO:0035253;GO:0031594;GO:0031410;GO:0030426;GO:0030424;GO:0030134;GO:0016021;GO:0009986;GO:0016020;GO:0005911;GO:0005886;GO:0005794;GO:0005791;GO:0005737;GO:0005615;GO:1990090;GO:0071874;GO:0051563;GO:0071320;GO:0051402;GO:0051247;GO:0051124;GO:0050885;GO:0050803;GO:0048669;GO:0045944;GO:0045931;GO:…	K04520-ko04726 Serotonergic synapse;ko05010 Alzheimer's disease	KOG3540-Beta amyloid precursor protein[R]
ENSG00000103653	2.60734	27.4576	-3.39655	2.0065e-157	4.82068e-156	down	CSK	CSK, non-receptor tyrosine kinase [Source:HGNC Symbol;Acc:HGNC:2444]	GO:0045121;GO:0005911;GO:0005737;GO:0071375;GO:0070373;GO:0060368;GO:0050765;GO:0048709;GO:0046777;GO:0045779;GO:0043406;GO:0034332;GO:0033673;GO:0032715;GO:0010989;GO:0008285;GO:0007420;GO:0006468;GO:0070064;GO:0019903;GO:0004713;GO:0004715;GO:0005515;GO:0005886;GO:0018108;GO:0016310;GO:0016301;GO:0016740;GO:0005524;GO:0000166;GO:0004672;GO:0046872;GO:0016020;GO:0002376;GO:0002250;GO:0045087;GO:…	K05728-ko05120 Epithelial cell signaling in Helicobacter pylori infection	KOG0197-Tyrosine kinases[T]
ENSG00000146731	5.07291	26.9832	-2.41118	2.39544e-156	5.74702e-155	down	CCT6A	chaperonin containing TCP1 subunit 6A [Source:HGNC Symbol;Acc:HGNC:1620]	GO:0006457;GO:0005829;GO:0005524;GO:0000166;GO:0005737;GO:0003723;GO:0005874;GO:0051082;GO:0061077;GO:0070062;GO:0031012;GO:0005515;GO:0050821;GO:0032212;GO:1904851;GO:1904874;GO:0044183;GO:0006458;GO:1904871;GO:0005832;GO:0071987	-	KOG0359-Chaperonin complex component, TCP-1 zeta subunit (CCT6)[O]
ENSG00000164944	3.0949	7.62054	-1.3	3.97423e-156	9.52139e-155	down	KIAA1429	KIAA1429 [Source:HGNC Symbol;Acc:HGNC:24500]	GO:0016604;GO:0005654;GO:0005829;GO:0016607;GO:0005634;GO:0008380;GO:0006397;GO:0003723;GO:0080009;GO:0036396	-	KOG4822-Predicted nuclear membrane protein involved in mRNA transport and sex determination via splicing modulation[AT]
ENSG00000162607	1.07319	11.929	-3.47449	8.50375e-156	2.03445e-154	down	USP1	ubiquitin specific peptidase 1 [Source:HGNC Symbol;Acc:HGNC:12607]	GO:0016579;GO:0036459;GO:0006511;GO:0001501;GO:0006508;GO:0008234;GO:0008233;GO:0016787;GO:0005654;GO:0005634;GO:0004197;GO:0006281;GO:0006974;GO:0005515;GO:0004843;GO:0036297;GO:0009411;GO:0006282;GO:0035520;GO:0042769	K11832-ko03460 Fanconi anemia pathway	KOG1864-Ubiquitin-specific protease[O]
ENSG00000130332	696.254	483.678	0.525565	1.16928e-155	2.79348e-154	-	LSM7	LSM7 homolog, U6 small nuclear RNA and mRNA degradation associated [Source:HGNC Symbol;Acc:HGNC:20470]	GO:0005681;GO:0005515;GO:0030529;GO:0005634;GO:0008380;GO:0006397;GO:0003723;GO:0000398;GO:0000956;GO:0005829;GO:0005654;GO:0043928;GO:0071013;GO:0071004;GO:0017070;GO:0097526;GO:0005688;GO:1990726;GO:0006396;GO:0005689	K12626-ko03040 Spliceosome;ko03018 RNA degradation	KOG1781-Small Nuclear ribonucleoprotein splicing factor[A]
ENSG00000145216	0.89097	17.7382	-4.31534	1.26806e-155	3.02524e-154	down	FIP1L1	factor interacting with PAPOLA and CPSF1 [Source:HGNC Symbol;Acc:HGNC:19124]	GO:0005515;GO:0005654;GO:0005634;GO:0006397;GO:0003723;GO:0006378;GO:0098789;GO:0005847;GO:0006369;GO:0031124;GO:0000398;GO:0006406	K14405-ko03015 mRNA surveillance pathway	KOG1049-Polyadenylation factor I complex, subunit FIP1[A]
ENSG00000149273	808.118	542.033	0.576186	1.35859e-155	3.23667e-154	-	RPS3	ribosomal protein S3 [Source:HGNC Symbol;Acc:HGNC:10420]	GO:0071159;GO:0071356;GO:0051092;GO:0050862;GO:0042104;GO:0032743;GO:0032403;GO:0000977;GO:0031334;GO:0005515;GO:0015935;GO:0005886;GO:0005739;GO:0005829;GO:0051301;GO:0005840;GO:0006412;GO:0003735;GO:0030529;GO:0006355;GO:0006351;GO:0003677;GO:0016829;GO:0005743;GO:0005783;GO:0006413;GO:0016020;GO:0005737;GO:0005634;GO:0003723;GO:0006915;GO:0022627;GO:0007049;GO:0006281;GO:0006974;GO:0005856;GO:…	K02985-ko03010 Ribosome	KOG3181-40S ribosomal protein S3[J]
ENSG00000085872	2.91461	24.9687	-3.09875	1.89802e-155	4.51549e-154	down	CHERP	calcium homeostasis endoplasmic reticulum protein [Source:HGNC Symbol;Acc:HGNC:16930]	GO:0033017;GO:0005515;GO:0005783;GO:0016020;GO:0005737;GO:0006396;GO:0003723;GO:0003676;GO:0048471;GO:0005654;GO:0044325;GO:0007399;GO:0000398;GO:0051209;GO:0008285;GO:0051533;GO:0006874	K12841-ko03040 Spliceosome	KOG4368-Predicted RNA binding protein, contains SWAP, RPR and G-patch domains[R]
ENSG00000120802	0.835452	12.8115	-3.93874	2.00666e-155	4.7673e-154	down	TMPO	thymopoietin [Source:HGNC Symbol;Acc:HGNC:11875]	GO:0005515;GO:0003677;GO:0031965;GO:0016021;GO:0016020;GO:0005737;GO:0005634;GO:0005637;GO:0005635;GO:0005521;GO:0006355;GO:0005694;GO:0045296;GO:0000785	-	-
ENSG00000138095	9.18264	22.0958	-1.26679	2.78817e-155	6.61471e-154	down	LRPPRC	leucine rich pentatricopeptide repeat containing [Source:HGNC Symbol;Acc:HGNC:15714]	GO:0030529;GO:0005739;GO:0005737;GO:0005634;GO:0070129;GO:0000961;GO:0003723;GO:0003697;GO:0005515;GO:0090305;GO:0006355;GO:0006351;GO:0003677;GO:0016020;GO:0051028;GO:0006810;GO:0005874;GO:0005654;GO:0005637;GO:0042645;GO:0008017;GO:0048471;GO:0031625;GO:0004519;GO:0048487;GO:0009451;GO:0047497;GO:0000794;GO:0005640;GO:0005856	-	KOG4318-Bicoid mRNA stability factor[A]
ENSG00000101558	0.850702	12.778	-3.90887	2.8607e-155	6.77735e-154	down	VAPA	VAMP associated protein A [Source:HGNC Symbol;Acc:HGNC:12648]	GO:0005789;GO:0004871;GO:0005515;GO:0005886;GO:0005783;GO:0016021;GO:0016020;GO:0005634;GO:0048471;GO:0030054;GO:0007165;GO:0008017;GO:0000139;GO:0005923;GO:0045296;GO:0043312;GO:0043123;GO:0006888;GO:0061025;GO:0031965;GO:0019904;GO:0046982;GO:0031982;GO:0035577;GO:0008219;GO:0030148;GO:0031175;GO:0044828;GO:0033149;GO:0090114;GO:0044791;GO:0044829;GO:0070972;GO:0015630	K06096-ko04530 Tight junction	-
ENSG00000160948	75.9316	45.1605	0.749637	3.59814e-155	8.51261e-154	-	VPS28	VPS28, ESCRT-I subunit [Source:HGNC Symbol;Acc:HGNC:18178]	GO:0005515;GO:0005886;GO:0015031;GO:0016020;GO:0005737;GO:0006810;GO:0005768;GO:0031902;GO:0070062;GO:0016197;GO:0016236;GO:0019058;GO:0036258;GO:0039702;GO:0075733;GO:0000813;GO:0010008;GO:0005769;GO:0043130;GO:0005829;GO:0031397;GO:0043162;GO:0045732;GO:0043328;GO:0032403;GO:2000397	K12184-ko04144 Endocytosis	KOG3284-Vacuolar sorting protein VPS28[U]
ENSG00000245910	20.5678	125.114	-2.60478	6.27279e-155	1.48198e-153	down	SNHG6	small nucleolar RNA host gene 6 [Source:HGNC Symbol;Acc:HGNC:32965]	-	-	-
ENSG00000232748	0.44087	11.6451	-4.72322	1.68204e-154	3.96839e-153	down	AC135050.1	-	-	-	-
ENSG00000115091	0.939059	8.3938	-3.16004	6.24468e-154	1.47126e-152	down	ACTR3	ARP3 actin related protein 3 homolog [Source:HGNC Symbol;Acc:HGNC:170]	GO:0007015;GO:0005524;GO:0034314;GO:0005885;GO:0030027;GO:0005911;GO:0051321;GO:0051653;GO:0005903;GO:0033206;GO:0016344;GO:0007163;GO:0008356;GO:0005515;GO:0003779;GO:0000166;GO:0016020;GO:0005737;GO:0005856;GO:0005925;GO:0042995;GO:0038096;GO:0060271;GO:0005829;GO:0070062;GO:0030030;GO:0061024;GO:0048013;GO:0015629;GO:0006928;GO:0051015;GO:0005200	-	KOG0678-Actin-related protein Arp2/3 complex, subunit Arp3[Z]
ENSG00000155827	0.841314	11.2893	-3.74617	7.67798e-154	1.80645e-152	down	RNF20	ring finger protein 20 [Source:HGNC Symbol;Acc:HGNC:10062]	GO:0031062;GO:0016574;GO:0003682;GO:0005515;GO:0016569;GO:0006355;GO:0003824;GO:0016567;GO:0016740;GO:0005654;GO:0046872;GO:0008270;GO:0005634;GO:0006511;GO:0003713;GO:0045893;GO:0005730;GO:0031625;GO:0042393;GO:0004842;GO:1900364;GO:0003730;GO:0002039;GO:0030336;GO:0000209;GO:0000151;GO:0010390;GO:0033523;GO:2001168;GO:0033503	-	KOG0978-E3 ubiquitin ligase involved in syntaxin degradation[O]
ENSG00000087269	15.8878	49.912	-1.65147	8.49454e-154	1.99581e-152	down	NOP14	NOP14 nucleolar protein [Source:HGNC Symbol;Acc:HGNC:16821]	GO:0005739;GO:0005730;GO:0005634;GO:0016020;GO:0003723;GO:0032040;GO:0006364;GO:0042274;GO:0042254;GO:0005654;GO:0019899;GO:0030490;GO:0000447;GO:0000472;GO:0000480;GO:0030686;GO:0030515;GO:0000462;GO:0030692	-	KOG2147-Nucleolar protein involved in 40S ribosome biogenesis[J]
ENSG00000171634	1.0329	7.18597	-2.79848	2.3298e-153	5.46638e-152	down	BPTF	bromodomain PHD finger transcription factor [Source:HGNC Symbol;Acc:HGNC:3581]	GO:0005654;GO:0046872;GO:0008270;GO:0048471;GO:0044297;GO:0043005;GO:0030425;GO:0005737;GO:0005634;GO:1990090;GO:0009952;GO:0009611;GO:0007492;GO:0001892;GO:0005515;GO:0016569;GO:0006355;GO:0006351;GO:0070062;GO:0000790;GO:0045893;GO:0048188;GO:0000122;GO:0016589;GO:0008134;GO:0043565;GO:0007420;GO:0008094;GO:0006338	-	KOG1473-Nucleosome remodeling factor, subunit NURF301/BPTF[BK]
ENSG00000111581	2.62195	10.4175	-1.9903	4.26541e-153	9.99407e-152	down	NUP107	nucleoporin 107 [Source:HGNC Symbol;Acc:HGNC:29914]	GO:0060964;GO:0005515;GO:0005813;GO:0005694;GO:0005643;GO:0005654;GO:0015031;GO:0006810;GO:0016020;GO:0005634;GO:0051028;GO:0006406;GO:0006355;GO:0000775;GO:0000776;GO:0000777;GO:0005829;GO:0075733;GO:0008585;GO:0007062;GO:0031965;GO:0016032;GO:0016925;GO:0006409;GO:0007077;GO:0010827;GO:0019083;GO:1900034;GO:0006606;GO:0005635;GO:0034399;GO:0005487;GO:0017056;GO:0051292;GO:0000973;GO:0031080	K14301-ko03013 RNA transport	KOG1964-Nuclear pore complex, rNup107 component (sc Nup84)[YU]
ENSG00000067167	0.778211	12.3848	-3.99227	5.64966e-153	1.32193e-151	down	TRAM1	translocation associated membrane protein 1 [Source:HGNC Symbol;Acc:HGNC:20568]	GO:0016021;GO:0016020;GO:0005515;GO:0005789;GO:0005783;GO:0015031;GO:0006810;GO:0016032;GO:0004872;GO:0006613	K14010-ko04141 Protein processing in endoplasmic reticulum	KOG1608-Protein transporter of the TRAM (translocating chain-associating membrane) superfamily[U]
ENSG00000173230	0.845693	7.27012	-3.10377	5.99948e-153	1.40185e-151	down	GOLGB1	golgin B1 [Source:HGNC Symbol;Acc:HGNC:4429]	GO:0005794;GO:0005515;GO:0043565;GO:0003700;GO:0006355;GO:0016021;GO:0016020;GO:0003723;GO:0000139;GO:0006888;GO:0005793;GO:0005795;GO:0007030;GO:1905793;GO:0005801	-	-
ENSG00000167552	7.33529	39.3974	-2.42517	6.87101e-153	1.6033e-151	down	TUBA1A	tubulin alpha 1a [Source:HGNC Symbol;Acc:HGNC:20766]	GO:0045121;GO:0043209;GO:0005881;GO:0019904;GO:0003924;GO:0007010;GO:0005200;GO:0005515;GO:0015630;GO:0005525;GO:0000166;GO:0005737;GO:0005634;GO:0005856;GO:0005874;GO:0007017;GO:0005829;GO:0070062;GO:0055037;GO:0000086;GO:0097711;GO:0036464;GO:0005198;GO:0030705;GO:0051301	K07374-ko04145 Phagosome;ko04210 Apoptosis;ko04540 Gap junction;ko05130 Pathogenic Escherichia coli infection	KOG1376-Alpha tubulin[Z]
ENSG00000213638	0.695684	23.2076	-5.06002	7.73402e-153	1.80221e-151	down	ADAT3	adenosine deaminase, tRNA specific 3 [Source:HGNC Symbol;Acc:HGNC:25151]	GO:0003824;GO:0008270	-	KOG2771-Subunit of tRNA-specific adenosine-34 deaminase[A]
ENSG00000168003	68.4029	24.4285	1.48549	2.29887e-152	5.34959e-151	up	SLC3A2	solute carrier family 3 member 2 [Source:HGNC Symbol;Acc:HGNC:11026]	GO:1902475;GO:0042470;GO:0035725;GO:0005886;GO:0005975;GO:0003824;GO:0005829;GO:0005634;GO:0016021;GO:0016020;GO:0006810;GO:0003723;GO:0006816;GO:0050900;GO:0005515;GO:0045296;GO:0070062;GO:0006865;GO:0016324;GO:0009986;GO:0016049;GO:0043330;GO:0003725;GO:0015175;GO:0005432;GO:0015827;GO:0060356	K06519-ko04150 mTOR signaling pathway;ko04974 Protein digestion and absorption	KOG0471-Alpha-amylase[G]
ENSG00000169567	5.11202	47.1622	-3.20566	3.32292e-152	7.72205e-151	down	HINT1	histidine triad nucleotide binding protein 1 [Source:HGNC Symbol;Acc:HGNC:4912]	GO:0005634;GO:0050850;GO:0005886;GO:0006355;GO:0006351;GO:0003824;GO:0016787;GO:0005829;GO:0000166;GO:0005737;GO:0006915;GO:0070062;GO:0000118;GO:0007165;GO:0005856;GO:0072332;GO:0005080;GO:0009154	-	KOG3275-Zinc-binding protein of the histidine triad (HIT) family[T]
ENSG00000103111	0.604162	10.0009	-4.04905	3.66869e-152	8.51396e-151	down	MON1B	MON1 homolog B, secretory trafficking associated [Source:HGNC Symbol;Acc:HGNC:25020]	GO:0005515;GO:0005737;GO:0012505;GO:0016192;GO:0019085;GO:0019086	-	KOG0997-Uncharacterized conserved protein Sand[S]
ENSG00000184208	3.14065	14.9766	-2.25357	3.91215e-152	9.0666e-151	down	C22orf46	chromosome 22 open reading frame 46 [Source:HGNC Symbol;Acc:HGNC:26294]	GO:0005576	-	-
ENSG00000149115	32.7589	48.068	-0.553188	4.03165e-152	9.33086e-151	-	TNKS1BP1	tankyrase 1 binding protein 1 [Source:HGNC Symbol;Acc:HGNC:19081]	GO:0005694;GO:0005737;GO:0005634;GO:0005856;GO:0005829;GO:0045296;GO:0005515;GO:0000289;GO:0006977;GO:0030014;GO:0005913;GO:0033138;GO:0019899;GO:0010800;GO:0031954;GO:0071479;GO:0005720;GO:0044877;GO:0006302;GO:0071532;GO:0007004	-	-
ENSG00000132383	0.869868	10.7164	-3.62288	4.15938e-152	9.61343e-151	down	RPA1	replication protein A1 [Source:HGNC Symbol;Acc:HGNC:10289]	GO:0003677;GO:0005634;GO:0006260;GO:0005662;GO:0003697;GO:0005515;GO:0006281;GO:0005654;GO:0046872;GO:0003676;GO:0006974;GO:0006310;GO:0000784;GO:0036297;GO:0000723;GO:0006284;GO:0006298;GO:1901796;GO:0000082;GO:0016605;GO:0000724;GO:0019985;GO:1900034;GO:0006283;GO:0003684;GO:0006261;GO:0042276;GO:0042769;GO:0006289;GO:0006293;GO:0006295;GO:0006296;GO:0033683;GO:0098505;GO:0006294;GO:0000722;GO:…	K07466-ko03030 DNA replication;ko03420 Nucleotide excision repair;ko03430 Mismatch repair;ko03440 Homologous recombination;ko03460 Fanconi anemia pathway	KOG0851-Single-stranded DNA-binding replication protein A (RPA), large (70 kD) subunit and related ssDNA-binding proteins[L]
ENSG00000102172	10.0025	44.872	-2.16546	9.77414e-152	2.256e-150	down	SMS	spermine synthase [Source:HGNC Symbol;Acc:HGNC:11123]	GO:0016740;GO:0006597;GO:0016768;GO:0006596;GO:0005829;GO:0070062;GO:0006595;GO:0006555;GO:0008215	K00802-ko00270 Cysteine and methionine metabolism;ko00330 Arginine and proline metabolism;ko00410 beta-Alanine metabolism;ko00480 Glutathione metabolism	KOG1562-Spermidine synthase[E]
ENSG00000105968	4.32642	59.7013	-3.78652	1.34093e-151	3.09084e-150	down	H2AFV	H2A histone family member V [Source:HGNC Symbol;Acc:HGNC:20664]	GO:0005694;GO:0000786;GO:0046982;GO:0003677;GO:0005634;GO:0000790;GO:0003674;GO:0008150;GO:0070062;GO:0006342	K11251-ko05322 Systemic lupus erythematosus;ko05034 Alcoholism	KOG1757-Histone 2A[B]
ENSG00000119318	4.85716	20.3263	-2.06516	2.04708e-151	4.71217e-150	down	RAD23B	RAD23 homolog B, nucleotide excision repair protein [Source:HGNC Symbol;Acc:HGNC:9813]	GO:0048568;GO:0007283;GO:0006974;GO:0000502;GO:0005515;GO:0003684;GO:0005654;GO:0005829;GO:0005737;GO:0005634;GO:0006289;GO:0006281;GO:0043161;GO:0016579;GO:0006457;GO:0070911;GO:0000715;GO:0000717;GO:0006294;GO:0032434;GO:0003697;GO:0071942;GO:0031593	K10839-ko04141 Protein processing in endoplasmic reticulum;ko03420 Nucleotide excision repair	KOG0011-Nucleotide excision repair factor NEF2, RAD23 component[L]
ENSG00000147123	390.248	280.613	0.475811	6.33573e-151	1.45645e-149	-	NDUFB11	NADH:ubiquinone oxidoreductase subunit B11 [Source:HGNC Symbol;Acc:HGNC:20372]	GO:0005515;GO:0005739;GO:0005743;GO:0055114;GO:0016021;GO:0016020;GO:0070469;GO:0006120;GO:0032981;GO:0005747	K11351-ko00190 Oxidative phosphorylation;ko05010 Alzheimer's disease;ko05012 Parkinson's disease;ko05016 Huntington's disease;ko04932 Non-alcoholic fatty liver disease (NAFLD)	-
ENSG00000065809	2.16295	22.4409	-3.37506	7.9567e-151	1.82661e-149	down	FAM107B	family with sequence similarity 107 member B [Source:HGNC Symbol;Acc:HGNC:23726]	-	-	-
ENSG00000129128	5.82145	16.4827	-1.5015	9.3007e-151	2.13228e-149	down	SPCS3	signal peptidase complex subunit 3 [Source:HGNC Symbol;Acc:HGNC:26212]	GO:0006508;GO:0008233;GO:0016787;GO:0043231;GO:0005789;GO:0031090;GO:0005783;GO:0016021;GO:0016020;GO:0006465;GO:0005787;GO:0045047	K12948-ko03060 Protein export	KOG3372-Signal peptidase complex subunit[U]
ENSG00000175592	800.691	714.849	0.163609	1.24465e-150	2.84965e-149	-	FOSL1	FOS like 1, AP-1 transcription factor subunit [Source:HGNC Symbol;Acc:HGNC:13718]	GO:0005515;GO:0043565;GO:0003700;GO:0003677;GO:0006357;GO:0006355;GO:0005654;GO:0005634;GO:0006935;GO:0006366;GO:0009615;GO:0000978;GO:0006968;GO:0008284;GO:2000144;GO:0061614;GO:0043231;GO:0043005;GO:0042734;GO:0005829;GO:0051591;GO:0060674;GO:0051412;GO:0051091;GO:0045944;GO:0045787;GO:0043065;GO:0042493;GO:0042542;GO:0034097;GO:0032570;GO:0031668;GO:0014070;GO:0009629;GO:0009612;GO:0008285;GO:…	K04502-ko04310 Wnt signaling pathway;ko04380 Osteoclast differentiation;ko05166 HTLV-I infection	KOG1414-Transcriptional activator FOSB/c-Fos and related bZIP transcription factors[K]
ENSG00000113810	1.16641	32.3189	-4.79223	1.30975e-150	2.99466e-149	down	SMC4	structural maintenance of chromosomes 4 [Source:HGNC Symbol;Acc:HGNC:14013]	GO:0000796;GO:0051383;GO:0045132;GO:0010032;GO:0005694;GO:0051276;GO:0005515;GO:0051301;GO:0005829;GO:0005524;GO:0000166;GO:0016607;GO:0005737;GO:0005634;GO:0007049;GO:0005654;GO:0030261;GO:0046982;GO:0000070;GO:0007076	K06675-ko04111 Cell cycle - yeast	KOG0996-Structural maintenance of chromosome protein 4 (chromosome condensation complex Condensin, subunit C)[BD]
ENSG00000142949	5.53251	17.5171	-1.66276	2.83181e-150	6.4661e-149	down	PTPRF	protein tyrosine phosphatase, receptor type F [Source:HGNC Symbol;Acc:HGNC:9670]	GO:0043025;GO:0043005;GO:0048679;GO:0031102;GO:0010975;GO:0035373;GO:0032403;GO:0004721;GO:0016311;GO:0016791;GO:0006470;GO:0004725;GO:0007155;GO:0016787;GO:0016021;GO:0016020;GO:0005886;GO:0008201;GO:0070062;GO:0035335;GO:0005887;GO:0016477;GO:0007185;GO:0005001;GO:1900121	K05695-ko04514 Cell adhesion molecules (CAMs);ko04520 Adherens junction;ko04910 Insulin signaling pathway;ko04931 Insulin resistance	KOG4228-Protein tyrosine phosphatase[T]
ENSG00000091527	3.24433	21.0431	-2.69735	2.9906e-150	6.81952e-149	down	CDV3	CDV3 homolog [Source:HGNC Symbol;Acc:HGNC:26928]	GO:0005737;GO:0003674;GO:0008283	-	-
ENSG00000164897	462.533	363.542	0.347435	4.03803e-150	9.1957e-149	-	TMUB1	transmembrane and ubiquitin like domain containing 1 [Source:HGNC Symbol;Acc:HGNC:21709]	GO:0005515;GO:0005886;GO:0005654;GO:0005829;GO:0016021;GO:0016020;GO:0005737;GO:0005634;GO:0030054;GO:0045202;GO:0045211;GO:0005856;GO:0005815;GO:0005730;GO:0005768;GO:0055037;GO:0030433	-	-
ENSG00000165275	0.341144	17.0989	-5.64738	8.60415e-150	1.95678e-148	down	TRMT10B	tRNA methyltransferase 10B [Source:HGNC Symbol;Acc:HGNC:26454]	GO:0009019;GO:0005829;GO:0032259;GO:0016740;GO:0008168;GO:0030488	-	KOG2967-Uncharacterized conserved protein[S]
ENSG00000178952	317.949	156.831	1.01958	9.48131e-150	2.1534e-148	up	TUFM	Tu translation elongation factor, mitochondrial [Source:HGNC Symbol;Acc:HGNC:12420]	GO:0043209;GO:0005743;GO:0005739;GO:0045471;GO:0003924;GO:0005515;GO:0005525;GO:0005622;GO:0000166;GO:0006412;GO:0016020;GO:0003723;GO:0003746;GO:0006414;GO:0070062;GO:0042645	-	-
ENSG00000002330	374.149	272.186	0.459022	9.76287e-150	2.21439e-148	-	BAD	BCL2 associated agonist of cell death [Source:HGNC Symbol;Acc:HGNC:936]	GO:0005829;GO:0005739;GO:0005737;GO:2000078;GO:1902220;GO:1901216;GO:0097192;GO:0071396;GO:0097190;GO:0071247;GO:0060154;GO:0051592;GO:0060139;GO:0051384;GO:0046031;GO:0046034;GO:0045582;GO:0045579;GO:0045471;GO:0044342;GO:0043281;GO:0043200;GO:0043065;GO:0042981;GO:0042593;GO:0042493;GO:0042542;GO:0035774;GO:0033574;GO:0034201;GO:0033133;GO:0032570;GO:0032355;GO:0032024;GO:0021987;GO:0019221;GO:…	K02158-ko04014 Ras signaling pathway;ko04012 ErbB signaling pathway;ko04370 VEGF signaling pathway;ko04024 cAMP signaling pathway;ko04022 cGMP - PKG signaling pathway;ko04151 PI3K-Akt signaling pathway;ko04210 Apoptosis;ko04510 Focal adhesion;ko04910 Insulin signaling pathway;ko04919 Thyroid hormone signaling pathway;ko04722 Neurotrophin signaling pathway;ko05200 Pathways in cancer;ko05203 Viral …	-
ENSG00000118816	6.52677	30.9903	-2.24738	9.77957e-150	2.21523e-148	down	CCNI	cyclin I [Source:HGNC Symbol;Acc:HGNC:1595]	GO:0051726;GO:0007283	-	KOG0653-Cyclin B and related kinase-activating proteins[D]
ENSG00000133316	236.712	496.235	-1.06789	1.20353e-149	2.72257e-148	down	WDR74	WD repeat domain 74 [Source:HGNC Symbol;Acc:HGNC:25529]	GO:0005515;GO:0005730;GO:0005634;GO:0030687;GO:0003674;GO:0008150;GO:0042273	-	KOG3881-Uncharacterized conserved protein[S]
ENSG00000106355	3.78953	37.0198	-3.2882	1.58403e-149	3.57857e-148	down	LSM5	LSM5 homolog, U6 small nuclear RNA and mRNA degradation associated [Source:HGNC Symbol;Acc:HGNC:17162]	GO:0005681;GO:0005515;GO:0030529;GO:0005634;GO:0008380;GO:0006397;GO:0003723;GO:0005829;GO:0005654;GO:0000398;GO:0046540;GO:0043928;GO:0005688;GO:1990726;GO:0000956	K12624-ko03040 Spliceosome;ko03018 RNA degradation	KOG1775-U6 snRNA-associated Sm-like protein[A]
ENSG00000073792	7.19523	21.4636	-1.57678	2.66465e-149	6.01187e-148	down	IGF2BP2	insulin like growth factor 2 mRNA binding protein 2 [Source:HGNC Symbol;Acc:HGNC:28867]	GO:0005515;GO:0005829;GO:0005737;GO:0005634;GO:0051028;GO:0006810;GO:0003729;GO:0003723;GO:0003676;GO:0043488;GO:0006417;GO:0017148;GO:0003730;GO:0045182;GO:0048027;GO:0009653;GO:0042035;GO:0005856	-	KOG2193-IGF-II mRNA-binding protein IMP, contains RRM and KH domains[AR]
ENSG00000111371	0.982289	8.99125	-3.1943	5.17347e-149	1.16567e-147	down	SLC38A1	solute carrier family 38 member 1 [Source:HGNC Symbol;Acc:HGNC:13447]	GO:0006814;GO:0005515;GO:0005886;GO:0006811;GO:0015293;GO:0016021;GO:0016020;GO:0006810;GO:0005887;GO:0070062;GO:1902475;GO:0015171;GO:0003333;GO:0006865;GO:0015175;GO:0015804;GO:0001504;GO:0005283;GO:0015179;GO:0030424;GO:0007565;GO:0006868;GO:0015186	K14990-ko04724 Glutamatergic synapse;ko04727 GABAergic synapse	KOG1305-Amino acid transporter protein[E]
ENSG00000198408	6.84459	30.4548	-2.15363	1.6205e-148	3.64645e-147	down	MGEA5	meningioma expressed antigen 5 (hyaluronidase) [Source:HGNC Symbol;Acc:HGNC:7056]	GO:0102571;GO:0102167;GO:0102166;GO:0016798;GO:0008152;GO:0005829;GO:0016787;GO:0016020;GO:0005737;GO:0005634;GO:0004415;GO:0016231;GO:0006044;GO:0006493;GO:0006516;GO:0006517	K15719-ko04931 Insulin resistance	KOG3698-Hyaluronoglucosaminidase[O]
ENSG00000082153	1.42564	8.53328	-2.5815	1.79995e-148	4.04491e-147	down	BZW1	basic leucine zipper and W2 domains 1 [Source:HGNC Symbol;Acc:HGNC:18380]	GO:0006355;GO:0006351;GO:0016020;GO:0005737;GO:0003723;GO:0045296	-	KOG2297-Predicted translation factor, contains W2 domain[J]
ENSG00000273154	31.4118	11.5462	1.44389	3.47003e-148	7.78768e-147	up	AL121845.3	-	GO:0050852;GO:0050853;GO:0016021;GO:0016020;GO:0046872;GO:0003676;GO:0005634;GO:0003700;GO:0045892	-	-
ENSG00000050405	4.70075	14.7873	-1.6534	3.7226e-148	8.34352e-147	down	LIMA1	LIM domain and actin binding 1 [Source:HGNC Symbol;Acc:HGNC:24636]	GO:0051015;GO:0046872;GO:0008270;GO:0051017;GO:0030835;GO:0005515;GO:0003779;GO:0005737;GO:0030054;GO:0005856;GO:0005925;GO:0045296;GO:0032154;GO:0003785;GO:0001725;GO:0031529;GO:0015629;GO:0005903	-	-
ENSG00000140691	15.9909	6.35463	1.33137	4.59307e-148	1.0281e-146	up	ARMC5	armadillo repeat containing 5 [Source:HGNC Symbol;Acc:HGNC:25781]	GO:0005925;GO:0005654;GO:0005829;GO:0005737	-	-
ENSG00000115524	2.58722	10.5132	-2.02272	9.30185e-148	2.07937e-146	down	SF3B1	splicing factor 3b subunit 1 [Source:HGNC Symbol;Acc:HGNC:10768]	GO:0005634;GO:0005681;GO:0005515;GO:0016607;GO:0008380;GO:0006397;GO:0003723;GO:0005654;GO:0003729;GO:0000398;GO:0045815;GO:0000375;GO:0071013;GO:0071004;GO:0000245;GO:0005686;GO:0005689;GO:0034693	K12828-ko03040 Spliceosome	KOG0213-Splicing factor 3b, subunit 1[A]
ENSG00000096063	7.66535	21.6333	-1.49683	9.66917e-148	2.15864e-146	down	SRPK1	SRSF protein kinase 1 [Source:HGNC Symbol;Acc:HGNC:11305]	GO:0050684;GO:0035556;GO:0006468;GO:0005524;GO:0004674;GO:0000287;GO:0005515;GO:0005886;GO:0016310;GO:0016301;GO:0043231;GO:0005783;GO:0016740;GO:0005829;GO:0005634;GO:0000166;GO:0004672;GO:0005737;GO:0008380;GO:0006397;GO:0003723;GO:0030154;GO:0007059;GO:0016032;GO:0045087;GO:0016363;GO:0045070;GO:0048024;GO:0000245;GO:0045071;GO:0035092	K15409-ko05168 Herpes simplex infection	KOG1290-Serine/threonine protein kinase[T]
ENSG00000125970	62.5916	148.089	-1.24243	1.41306e-147	3.15052e-146	down	RALY	RALY heterogeneous nuclear ribonucleoprotein [Source:HGNC Symbol;Acc:HGNC:15921]	GO:0005681;GO:0030529;GO:0006355;GO:0006351;GO:0005634;GO:0008380;GO:0006397;GO:0003723;GO:0003676;GO:0005515;GO:0000398;GO:0003712;GO:0071013;GO:1903506;GO:2000188	-	KOG0118-FOG: RRM domain[R]
ENSG00000117632	19.9999	70.7312	-1.82235	2.46645e-147	5.49195e-146	down	STMN1	stathmin 1 [Source:HGNC Symbol;Acc:HGNC:6510]	GO:0016020;GO:0005829;GO:0005737;GO:0051272;GO:0007420;GO:0031115;GO:0007409;GO:0000281;GO:0048012;GO:0007019;GO:0015631;GO:0031110;GO:1905098;GO:0070495;GO:0061436;GO:0051497;GO:0035024;GO:0005515;GO:0007275;GO:0007399;GO:0030154;GO:0005856;GO:0005874;GO:0070062;GO:0009615;GO:0043005;GO:0004871;GO:0007165;GO:0035556;GO:0005622;GO:0007052;GO:0031175;GO:0051493	K04381-ko04010 MAPK signaling pathway;ko05206 MicroRNAs in cancer	-
ENSG00000261373	2.45217	25.9957	-3.40614	3.71784e-147	8.26759e-146	down	VPS9D1-AS1	VPS9D1 antisense RNA 1 [Source:HGNC Symbol;Acc:HGNC:48915]	-	-	-
ENSG00000100380	1.44869	13.7173	-3.24317	4.9671e-147	1.10312e-145	down	ST13	ST13, Hsp70 interacting protein [Source:HGNC Symbol;Acc:HGNC:11343]	GO:0005829;GO:0043234;GO:0070389;GO:0051260;GO:0061084;GO:0006457;GO:0051087;GO:0051082;GO:0042802;GO:0032564;GO:0032403;GO:0030544;GO:0019904;GO:0005515;GO:0046983;GO:0005737;GO:0070062;GO:0030674	-	KOG1308-Hsp70-interacting protein Hip/Transient component of progesterone receptor complexes and an Hsp70-binding protein[OT]
ENSG00000110841	1.29322	20.1033	-3.95839	9.37403e-147	2.07913e-145	down	PPFIBP1	PPFIA binding protein 1 [Source:HGNC Symbol;Acc:HGNC:9249]	GO:0005925;GO:0005829;GO:0045296;GO:0005886;GO:0007155	-	KOG1899-LAR transmembrane tyrosine phosphatase-interacting protein liprin[R]
ENSG00000165525	0.795878	12.8654	-4.0148	1.66769e-146	3.69406e-145	down	NEMF	nuclear export mediator factor [Source:HGNC Symbol;Acc:HGNC:10663]	GO:0005634;GO:0051168	-	KOG2030-Predicted RNA-binding protein[R]
ENSG00000134419	443.868	482.658	-0.120872	2.64845e-146	5.85893e-145	-	RPS15A	ribosomal protein S15a [Source:HGNC Symbol;Acc:HGNC:10389]	GO:0005739;GO:0005840;GO:0006412;GO:0003735;GO:0030529;GO:0016020;GO:0005737;GO:0003723;GO:0022627;GO:0005829;GO:0070062;GO:0005654;GO:0009615;GO:0031012;GO:0005515;GO:0008284;GO:0006413;GO:0006364;GO:0045787;GO:0000184;GO:0019083;GO:0006614	K02957-ko03010 Ribosome	KOG1754-40S ribosomal protein S15/S22[J]
ENSG00000215492	3.87335	45.1959	-3.54454	2.74183e-146	6.05764e-145	down	HNRNPA1P7	heterogeneous nuclear ribonucleoprotein A1 pseudogene 7 [Source:HGNC Symbol;Acc:HGNC:31015]	-	-	-
ENSG00000106153	46.2931	137.826	-1.57398	7.37976e-146	1.62833e-144	down	CHCHD2	coiled-coil-helix-coiled-coil-helix domain containing 2 [Source:HGNC Symbol;Acc:HGNC:21645]	GO:0005739;GO:0005515;GO:0006351;GO:0005634;GO:0005758;GO:0045944;GO:0043565;GO:0008134;GO:1900037;GO:0007005	-	KOG4090-Uncharacterized conserved protein[S]
ENSG00000188229	544.437	447.507	0.282856	8.97401e-146	1.97753e-144	-	TUBB4B	tubulin beta 4B class IVb [Source:HGNC Symbol;Acc:HGNC:20771]	GO:0043209;GO:0003924;GO:0007010;GO:0005200;GO:0015630;GO:0005525;GO:0000166;GO:0005737;GO:0005634;GO:0005856;GO:0005874;GO:0005576;GO:0007017;GO:0005829;GO:0070062;GO:0000086;GO:0097711;GO:0031012;GO:0043312;GO:0006928;GO:0035578;GO:1903561;GO:0051082;GO:0042288;GO:0003725;GO:0042267	K07375-ko04145 Phagosome;ko04540 Gap junction;ko05130 Pathogenic Escherichia coli infection	KOG1375-Beta tubulin[Z]
ENSG00000181924	35.2107	0.784732	5.48767	1.01691e-145	2.23798e-144	up	COA4	cytochrome c oxidase assembly factor 4 homolog [Source:HGNC Symbol;Acc:HGNC:24604]	GO:0005739;GO:0033617;GO:0005758	-	KOG4138-Unchracterized conserved protein (estrogen up-regulated protein E2IG2 in human)[R]
ENSG00000186187	26.6019	10.5067	1.34022	1.14155e-145	2.50904e-144	up	ZNRF1	zinc and ring finger 1 [Source:HGNC Symbol;Acc:HGNC:18452]	GO:0070936;GO:0043161;GO:0061630;GO:0004842;GO:0005515;GO:0016567;GO:0016740;GO:0046872;GO:0008270;GO:0016020;GO:0030054;GO:0045202;GO:0031410;GO:0005764;GO:0005768;GO:0005829;GO:0000209;GO:0030672	-	KOG0801-Predicted E3 ubiquitin ligase[O]
ENSG00000198492	0.101806	11.9958	-6.88056	1.26917e-145	2.78597e-144	down	YTHDF2	YTH N6-methyladenosine RNA binding protein 2 [Source:HGNC Symbol;Acc:HGNC:31675]	GO:0005829;GO:0005737;GO:0005634;GO:0003723;GO:0000932;GO:0005515;GO:0006959;GO:1990247;GO:0048598;GO:0043488;GO:0061157;GO:1903679	-	KOG1901-Uncharacterized high-glucose-regulated protein[R]
ENSG00000175470	0.032111	7.72003	-7.9094	1.91466e-145	4.19747e-144	down	PPP2R2D	protein phosphatase 2 regulatory subunit Bdelta [Source:HGNC Symbol;Acc:HGNC:23732]	GO:0050790;GO:0051301;GO:0005737;GO:0007049;GO:0019888;GO:0000159;GO:0005515;GO:0005829;GO:0010458;GO:0000278;GO:0004722;GO:0032502;GO:0070262	K04354-ko03015 mRNA surveillance pathway;ko04390 Hippo signaling pathway;ko04391 Hippo signaling pathway -fly;ko04071 Sphingolipid signaling pathway;ko04151 PI3K-Akt signaling pathway;ko04152 AMPK signaling pathway;ko04111 Cell cycle - yeast;ko04530 Tight junction;ko04261 Adrenergic signaling in cardiomyocytes;ko04728 Dopaminergic synapse;ko05160 Hepatitis C;ko05142 Chagas disease (American trypa…	KOG1354-Serine/threonine protein phosphatase 2A, regulatory subunit[T]
ENSG00000060339	0.826892	10.4922	-3.66547	2.64338e-145	5.78758e-144	down	CCAR1	cell division cycle and apoptosis regulator 1 [Source:HGNC Symbol;Acc:HGNC:24236]	GO:0006355;GO:0003713;GO:0005515;GO:0006351;GO:0005737;GO:0003723;GO:0006915;GO:0007049;GO:0048471;GO:1903507;GO:0001047;GO:0003714;GO:0005654;GO:0030335;GO:0008284;GO:0000398;GO:0030374	-	KOG4246-Predicted DNA-binding protein, contains SAP domain[R]
ENSG00000278774	7.35128	188.843	-4.68304	3.2369e-145	7.07797e-144	down	U2	U2 spliceosomal RNA [Source:RFAM;Acc:RF00004]	-	-	-
ENSG00000185222	0.09857	36.432	-8.52984	8.03038e-145	1.75371e-143	down	TCEAL9	transcription elongation factor A like 9 [Source:HGNC Symbol;Acc:HGNC:30084]	GO:0050699;GO:0006355;GO:0006351;GO:0005634	-	-
ENSG00000196591	6.9024	6.03281	0.194267	9.35109e-145	2.03952e-143	-	HDAC2	histone deacetylase 2 [Source:HGNC Symbol;Acc:HGNC:4853]	GO:0005737;GO:0005634;GO:0000785;GO:2000757;GO:1903351;GO:0071560;GO:0071300;GO:0070932;GO:0070301;GO:0061000;GO:0055093;GO:0048714;GO:0048149;GO:0045892;GO:0043392;GO:0042493;GO:0042220;GO:0035094;GO:0034605;GO:0032760;GO:0032732;GO:0032496;GO:0031000;GO:0016575;GO:0010977;GO:0010718;GO:0008284;GO:0003300;GO:0001975;GO:0031072;GO:0019899;GO:0008134;GO:0004407;GO:0001047;GO:0048511;GO:0005515;GO:…	K06067-ko04330 Notch signaling pathway;ko04110 Cell cycle;ko04919 Thyroid hormone signaling pathway;ko04213 Longevity regulating pathway - multiple species;ko05200 Pathways in cancer;ko05202 Transcriptional misregulation in cancers;ko05203 Viral carcinogenesis;ko05220 Chronic myeloid leukemia;ko05016 Huntington's disease;ko05034 Alcoholism;ko05169 Epstein-Barr virus infection	KOG1342-Histone deacetylase complex, catalytic component RPD3[B]
ENSG00000186660	2.72102	13.369	-2.29667	1.09413e-144	2.3833e-143	down	ZFP91	ZFP91 zinc finger protein [Source:HGNC Symbol;Acc:HGNC:14983]	GO:0016567;GO:0016740;GO:0005730;GO:0005634;GO:0046872;GO:0003676;GO:0007250;GO:0004842;GO:0070534	-	KOG1721-FOG: Zn-finger[R]
ENSG00000113141	15.6524	53.5841	-1.77542	1.14417e-144	2.48911e-143	down	IK	IK cytokine, down-regulator of HLA II [Source:HGNC Symbol;Acc:HGNC:5958]	GO:0005634;GO:0005515;GO:0016607;GO:0042802;GO:0006955;GO:0007267;GO:0005615	-	KOG2498-IK cytokine down-regulator of HLA class II[T]
ENSG00000265688	21.3416	2.65488	3.00695	1.33465e-144	2.89981e-143	up	MAFG-AS1	MAFG antisense RNA 1 (head to head) [Source:HGNC Symbol;Acc:HGNC:43649]	-	-	-
ENSG00000056097	0.798129	9.52843	-3.57754	4.6002e-144	9.98215e-143	down	ZFR	zinc finger RNA binding protein [Source:HGNC Symbol;Acc:HGNC:17277]	GO:0005515;GO:0005694;GO:0003677;GO:0008270;GO:0005737;GO:0005634;GO:0003723;GO:0003676;GO:0007275	-	KOG3792-Transcription factor NFAT, subunit NF90[R]
ENSG00000119596	3.07796	12.4659	-2.01794	9.91254e-144	2.14822e-142	down	YLPM1	YLP motif containing 1 [Source:HGNC Symbol;Acc:HGNC:17798]	GO:0005634;GO:0005515;GO:0006355;GO:0006351;GO:0005654;GO:0005829;GO:0016607;GO:0003723;GO:0008150	-	-
ENSG00000172270	1124.4	1009.18	0.155979	1.38289e-143	2.99316e-142	-	BSG	basigin (Ok blood group) [Source:HGNC Symbol;Acc:HGNC:1116]	GO:0042470;GO:0005886;GO:0005739;GO:0030246;GO:0016020;GO:0043231;GO:0016021;GO:0005925;GO:0050900;GO:0005887;GO:0005515;GO:0045296;GO:0070062;GO:0007166;GO:0006090;GO:0000139;GO:0030198;GO:0022617;GO:0008028;GO:0005537;GO:0015718;GO:0072661;GO:0045121;GO:0042383;GO:0002080;GO:0051591;GO:0046697;GO:0046689;GO:0043434;GO:0042475;GO:0007566	-	-
ENSG00000138166	0.378715	13.5928	-5.16558	1.69738e-143	3.66918e-142	down	DUSP5	dual specificity phosphatase 5 [Source:HGNC Symbol;Acc:HGNC:3071]	GO:0000188;GO:0017017;GO:0005515;GO:0004721;GO:0016311;GO:0016791;GO:0006470;GO:0008138;GO:0004725;GO:0016787;GO:0005634;GO:0000165;GO:0005654;GO:0035335;GO:0035970;GO:0000187;GO:0001706	K04459-ko04010 MAPK signaling pathway	KOG1716-Dual specificity phosphatase[V]
ENSG00000165644	139.872	53.3797	1.38975	1.81348e-143	3.91518e-142	up	COMTD1	catechol-O-methyltransferase domain containing 1 [Source:HGNC Symbol;Acc:HGNC:26309]	GO:0005739;GO:0005515;GO:0032259;GO:0016740;GO:0008168;GO:0016021;GO:0016020;GO:0008171	-	KOG1663-O-methyltransferase[Q]
ENSG00000114626	63.2047	21.5433	1.55279	2.83405e-143	6.11078e-142	up	ABTB1	ankyrin repeat and BTB domain containing 1 [Source:HGNC Symbol;Acc:HGNC:18275]	GO:0005515;GO:0005886;GO:0005829;GO:0005730;GO:0006412;GO:0005737;GO:0003746;GO:0006414;GO:0031625;GO:0043161;GO:0030162;GO:0042787;GO:0019005	-	KOG0511-Ankyrin repeat protein[R]
ENSG00000124733	199.169	114.913	0.793458	2.9913e-143	6.44169e-142	-	MEA1	male-enhanced antigen 1 [Source:HGNC Symbol;Acc:HGNC:6986]	GO:0005737;GO:0005515;GO:0007275;GO:0030154;GO:0007283;GO:0008584	-	-
ENSG00000198624	46.5101	24.5926	0.91932	3.31468e-143	7.12908e-142	-	CCDC69	coiled-coil domain containing 69 [Source:HGNC Symbol;Acc:HGNC:24487]	-	-	-
ENSG00000185359	36.5268	73.2294	-1.00347	3.97487e-143	8.53821e-142	down	HGS	hepatocyte growth factor-regulated tyrosine kinase substrate [Source:HGNC Symbol;Acc:HGNC:4897]	GO:0005622;GO:0006886;GO:0005515;GO:0046872;GO:0016310;GO:0016301;GO:0005829;GO:0043231;GO:0015031;GO:0016020;GO:0005737;GO:0006810;GO:0031901;GO:0005764;GO:0005768;GO:0070062;GO:0010628;GO:0072657;GO:0061024;GO:0016197;GO:0016236;GO:0036258;GO:0016579;GO:0007165;GO:0019904;GO:0032585;GO:1903543;GO:0008285;GO:0006622;GO:0010324;GO:0042059;GO:0042176;GO:0043405;GO:0046426;GO:0005769;GO:0033565	K12182-ko04144 Endocytosis;ko04145 Phagosome	KOG1818-Membrane trafficking and cell signaling protein HRS, contains VHS and FYVE domains[TU]
ENSG00000090273	544.67	454.921	0.259768	4.90205e-143	1.05166e-141	-	NUDC	nuclear distribution C, dynein complex regulator [Source:HGNC Symbol;Acc:HGNC:8045]	GO:0016021;GO:0016020;GO:0005515;GO:0051301;GO:0005737;GO:0005634;GO:0007049;GO:0005856;GO:0005874;GO:0005829;GO:0045296;GO:0005654;GO:0007062;GO:0007275;GO:0008283;GO:0006457;GO:0051082	-	KOG2265-Nuclear distribution protein NUDC[T]
ENSG00000129083	1.44784	13.6409	-3.23597	5.46823e-143	1.17165e-141	down	COPB1	coatomer protein complex subunit beta 1 [Source:HGNC Symbol;Acc:HGNC:2231]	GO:0030137;GO:0030126;GO:0005798;GO:0005794;GO:0006891;GO:0005515;GO:0005886;GO:0005198;GO:0005829;GO:0043231;GO:0030117;GO:0016192;GO:0015031;GO:0006886;GO:0016020;GO:0005737;GO:0006810;GO:0000139;GO:0031410;GO:0030663;GO:0005789;GO:0006890;GO:0043312;GO:0070821;GO:0006888;GO:0016032;GO:0030667;GO:0030133;GO:0005793;GO:0101003	-	KOG1058-Vesicle coat complex COPI, beta subunit[U]
ENSG00000162191	115.923	223.638	-0.947998	5.50166e-143	1.17733e-141	-	UBXN1	UBX domain protein 1 [Source:HGNC Symbol;Acc:HGNC:18402]	GO:0043025;GO:0030425;GO:0005737;GO:0005634;GO:0000502;GO:0005515;GO:0005783;GO:0005829;GO:0006457;GO:0032435;GO:0043161;GO:0031397;GO:0031625;GO:0051117;GO:0043130;GO:0034098;GO:0031593;GO:0036435;GO:0071796;GO:1903094;GO:1904293;GO:2000157	-	KOG2689-Predicted ubiquitin regulatory protein[O]
ENSG00000166181	5.11889	12.5189	-1.29021	5.78733e-143	1.23691e-141	down	API5	apoptosis inhibitor 5 [Source:HGNC Symbol;Acc:HGNC:594]	GO:0005681;GO:0005515;GO:0016020;GO:0016607;GO:0005737;GO:0005634;GO:0003723;GO:0006915;GO:0043066;GO:0017134;GO:2000270	-	KOG2213-Apoptosis inhibitor 5/fibroblast growth factor 2-interacting factor 2, and related proteins[T]
ENSG00000270647	38.2705	97.0406	-1.34235	3.19324e-142	6.81624e-141	down	TAF15	TATA-box binding protein associated factor 15 [Source:HGNC Symbol;Acc:HGNC:11547]	GO:0005515;GO:0003677;GO:0005654;GO:0046872;GO:0008270;GO:0005737;GO:0005634;GO:0003723;GO:0003676;GO:0045893	K14651-ko03022 Basal transcription factors;ko05202 Transcriptional misregulation in cancers	-
ENSG00000122966	5.35672	18.4798	-1.78653	3.20037e-142	6.82293e-141	down	CIT	citron rho-interacting serine/threonine kinase [Source:HGNC Symbol;Acc:HGNC:1985]	GO:0043025;GO:0031985;GO:0005886;GO:0008064;GO:0007030;GO:0000086;GO:0017048;GO:0051301;GO:0035556;GO:0016310;GO:0016301;GO:0016740;GO:0006468;GO:0005524;GO:0004674;GO:0000166;GO:0004672;GO:0046872;GO:0016020;GO:0005737;GO:0007275;GO:0007049;GO:0007399;GO:0030154;GO:0005515;GO:0005829;GO:0017124;GO:0030165;GO:0097110;GO:0000281;GO:0000910;GO:0032467;GO:0048699;GO:0051402;GO:0000278;GO:0005622	-	KOG0612-Rho-associated, coiled-coil containing protein kinase[T]
ENSG00000122033	3.16292	44.8634	-3.82621	5.76528e-142	1.22757e-140	down	MTIF3	mitochondrial translational initiation factor 3 [Source:HGNC Symbol;Acc:HGNC:29788]	GO:0005515;GO:0005739;GO:0006413;GO:0006412;GO:0003743;GO:0032790;GO:0008135;GO:0043024;GO:0070124	-	-
ENSG00000166794	718.599	579.511	0.310352	6.73023e-142	1.43125e-140	-	PPIB	peptidylprolyl isomerase B [Source:HGNC Symbol;Acc:HGNC:9255]	GO:0034663;GO:0005790;GO:0042470;GO:0005515;GO:0006457;GO:0000413;GO:0003755;GO:0005783;GO:0005634;GO:0016853;GO:0016020;GO:0003723;GO:0048471;GO:0005925;GO:0005788;GO:0070062;GO:0060348;GO:0050821;GO:0070063;GO:0032403;GO:0061077;GO:0051082;GO:0005518;GO:0032991;GO:0044794;GO:0040018;GO:0044829	-	KOG0880-Peptidyl-prolyl cis-trans isomerase[O]
ENSG00000204713	19.5855	3.03825	2.68847	9.50053e-142	2.01785e-140	up	TRIM27	tripartite motif containing 27 [Source:HGNC Symbol;Acc:HGNC:9975]	GO:0005515;GO:0001650;GO:0005622;GO:0018108;GO:0006355;GO:0006351;GO:0003677;GO:0016740;GO:0005730;GO:0005634;GO:0046872;GO:0008270;GO:0005829;GO:0005737;GO:0006810;GO:0045087;GO:0042802;GO:0005768;GO:0005769;GO:0034314;GO:0042147;GO:0005887;GO:0032720;GO:0004842;GO:0016020;GO:0070534;GO:0016605;GO:0072643;GO:0008283;GO:0007283;GO:0051091;GO:0006469;GO:0000122;GO:0030904;GO:0032897;GO:0003676;GO:…	-	-
ENSG00000012232	0.434288	4.88773	-3.49244	1.05537e-141	2.23875e-140	-	EXTL3	exostosin like glycosyltransferase 3 [Source:HGNC Symbol;Acc:HGNC:3518]	GO:0016021;GO:0006024;GO:0015012;GO:0030307;GO:0004872;GO:0016757;GO:0005789;GO:0005783;GO:0016740;GO:0046872;GO:0016020;GO:0036498;GO:0001888	K02370-ko00534 Glycosaminoglycan biosynthesis - heparan sulfate / heparin	KOG2264-Exostosin EXT1L[T]
ENSG00000116670	165.383	89.7182	0.882334	1.29755e-141	2.74906e-140	-	MAD2L2	mitotic arrest deficient 2 like 2 [Source:HGNC Symbol;Acc:HGNC:6764]	GO:0005515;GO:0051301;GO:0006355;GO:0006351;GO:0005829;GO:0005730;GO:0005737;GO:0005634;GO:0007049;GO:0006281;GO:0006974;GO:0005856;GO:0045893;GO:0005819;GO:0005654;GO:0001558;GO:0000122;GO:0043433;GO:0005680;GO:0001102;GO:0042177;GO:0010719;GO:0010944;GO:0033138;GO:0090090;GO:0007094;GO:0042276;GO:0016035;GO:0006302;GO:2000048;GO:0007015;GO:2000678;GO:1904667;GO:0008432;GO:0042772	K13728-ko04110 Cell cycle;ko04114 Oocyte meiosis;ko04914 Progesterone-mediated oocyte maturation;ko05131 Shigellosis;ko05100 Bacterial invasion of epithelial cells	KOG3186-Mitotic spindle checkpoint protein[D]
ENSG00000089327	1128.86	1509.47	-0.419177	1.33524e-141	2.8254e-140	-	FXYD5	FXYD domain containing ion transport regulator 5 [Source:HGNC Symbol;Acc:HGNC:4029]	GO:0034220;GO:0006811;GO:0005216;GO:0016020;GO:0003779;GO:0016021;GO:0006810;GO:0017080;GO:2000649;GO:0005887;GO:0005515;GO:0045296;GO:0030033;GO:0046588	-	-
ENSG00000011426	2.95626	14.5756	-2.30171	2.22897e-141	4.7107e-140	down	ANLN	anillin actin binding protein [Source:HGNC Symbol;Acc:HGNC:14082]	GO:0002244;GO:0051301;GO:0003779;GO:0005654;GO:0005737;GO:0005634;GO:0007049;GO:0005856;GO:0045296;GO:0005938;GO:0000281;GO:0090521;GO:0015629;GO:0000921;GO:0007096;GO:0005826	-	KOG3640-Actin binding protein Anillin[DZ]
ENSG00000169727	291.55	227.626	0.357079	2.76622e-141	5.83888e-140	-	GPS1	G protein pathway suppressor 1 [Source:HGNC Symbol;Acc:HGNC:4549]	GO:0005515;GO:0005737;GO:0005634;GO:0008180;GO:0000338;GO:0005829;GO:0005654;GO:0005095;GO:0034260;GO:0006283;GO:0043687;GO:0007049;GO:0000715;GO:0007254;GO:0000188	-	KOG0686-COP9 signalosome, subunit CSN1[OT]
ENSG00000133789	2.20482	11.6404	-2.40041	3.21202e-141	6.77148e-140	down	SWAP70	SWAP switching B-cell complex subunit 70 [Source:HGNC Symbol;Acc:HGNC:17070]	GO:0005509;GO:0005634;GO:1902309;GO:0060754;GO:0051017;GO:0045190;GO:0033633;GO:0032880;GO:0032233;GO:0030835;GO:0016444;GO:0008064;GO:0007204;GO:0005524;GO:0003677;GO:0005515;GO:0005886;GO:0016020;GO:0005737;GO:0005856;GO:0042995;GO:0045296;GO:0030027	-	-
ENSG00000104067	1.84085	9.81513	-2.41464	2.42272e-140	5.1012e-139	down	TJP1	tight junction protein 1 [Source:HGNC Symbol;Acc:HGNC:11827]	GO:0005515;GO:0030054;GO:0005886;GO:0005829;GO:0016020;GO:0005737;GO:0005921;GO:0005923;GO:0005516;GO:0045296;GO:0035329;GO:0016323;GO:0007043;GO:0090557;GO:1901350;GO:0005913;GO:0043296;GO:0045177;GO:0070160;GO:0046581;GO:0043234;GO:0016327;GO:0016324;GO:0014704;GO:0005912;GO:0005911;GO:0005634;GO:0071333;GO:0071000;GO:0045471;GO:0043116;GO:0042493;GO:0032496;GO:0007605;GO:0001825;GO:0071253;GO:…	K05701-ko04520 Adherens junction;ko04530 Tight junction;ko04540 Gap junction;ko05110 Vibrio cholerae infection;ko05120 Epithelial cell signaling in Helicobacter pylori infection;ko05132 Salmonella infection	KOG3580-Tight junction proteins[T]
ENSG00000155096	1.24114	10.0551	-3.01819	2.4254e-140	5.10054e-139	down	AZIN1	antizyme inhibitor 1 [Source:HGNC Symbol;Acc:HGNC:16432]	GO:0005634;GO:1902269;GO:0042978;GO:0005515;GO:0043085;GO:0003824;GO:0006596;GO:0005737;GO:0005829;GO:0006521;GO:0033387;GO:0042177	-	KOG0622-Ornithine decarboxylase[E]
ENSG00000143207	1.63049	77.7664	-5.57577	2.91972e-140	6.1325e-139	down	RFWD2	ring finger and WD repeat domain 2 [Source:HGNC Symbol;Acc:HGNC:17440]	GO:0008270;GO:0000139;GO:0005515;GO:0016567;GO:0016740;GO:0046872;GO:0016607;GO:0005737;GO:0005634;GO:0005829;GO:0005654;GO:0004842;GO:0061630;GO:0043687;GO:0032436;GO:0010212;GO:0016021;GO:0016020	K10143-ko04120 Ubiquitin mediated proteolysis;ko04115 p53 signaling pathway;ko04712 Circadian rhythm - plant	-
ENSG00000005884	44.5444	77.6847	-0.802388	3.06781e-140	6.4356e-139	-	ITGA3	integrin subunit alpha 3 [Source:HGNC Symbol;Acc:HGNC:6139]	GO:0097060;GO:0060076;GO:0045202;GO:0048471;GO:0034667;GO:0030426;GO:0009986;GO:0016323;GO:0005886;GO:0009897;GO:0097062;GO:0060135;GO:0042493;GO:0044708;GO:0035640;GO:0035024;GO:0034698;GO:0031345;GO:0010976;GO:0010811;GO:0010628;GO:0010634;GO:0007613;GO:0007155;GO:0007507;GO:0001764;GO:0043236;GO:0046982;GO:0019904;GO:0005518;GO:0005178;GO:0001968;GO:0046872;GO:0016021;GO:0016020;GO:0030054;GO:…	K06482-ko04151 PI3K-Akt signaling pathway;ko04512 ECM-receptor interaction;ko04810 Regulation of actin cytoskeleton;ko04510 Focal adhesion;ko04640 Hematopoietic cell lineage;ko05200 Pathways in cancer;ko05222 Small cell lung cancer;ko05410 Hypertrophic cardiomyopathy (HCM);ko05412 Arrhythmogenic right ventricular cardiomyopathy (ARVC);ko05414 Dilated cardiomyopathy (DCM)	-
ENSG00000118200	0.399075	7.24446	-4.18215	4.89565e-140	1.02574e-138	down	CAMSAP2	calmodulin regulated spectrin associated protein family member 2 [Source:HGNC Symbol;Acc:HGNC:29188]	GO:0031175;GO:0005515;GO:0005829;GO:0005737;GO:0008017;GO:0005856;GO:0005874;GO:0005516;GO:0005813;GO:1990752;GO:0000226;GO:0033043;GO:0030507;GO:0051011	-	-
ENSG00000100577	54.1292	47.166	0.19866	5.6374e-140	1.1797e-138	-	GSTZ1	glutathione S-transferase zeta 1 [Source:HGNC Symbol;Acc:HGNC:4643]	GO:0005739;GO:0003824;GO:0016740;GO:0016853;GO:0005737;GO:0009072;GO:0008152;GO:0005515;GO:0042803;GO:0098869;GO:0004364;GO:0005829;GO:0006749;GO:1901687;GO:0004602;GO:0016034;GO:0006559;GO:0006572	K01800-ko00350 Tyrosine metabolism;ko00643 Styrene degradation	KOG0868-Glutathione S-transferase[O]
ENSG00000108588	5.68254	18.3867	-1.69406	7.12281e-140	1.48871e-138	down	CCDC47	coiled-coil domain containing 47 [Source:HGNC Symbol;Acc:HGNC:24856]	GO:0005791;GO:0005783;GO:0055074;GO:0030433;GO:0009791;GO:0007029;GO:0006983;GO:0005509;GO:0005515;GO:0016021;GO:0016020;GO:0003723;GO:0001649	-	KOG2357-Uncharacterized conserved protein[S]
ENSG00000082781	11.1135	1.8615	2.57777	1.12061e-139	2.33926e-138	up	ITGB5	integrin subunit beta 5 [Source:HGNC Symbol;Acc:HGNC:6160]	GO:0004872;GO:0007229;GO:0008305;GO:0007155;GO:0016021;GO:0016020;GO:0005515;GO:0005925;GO:0005886;GO:0046718;GO:0070062;GO:0002479;GO:0016032;GO:0009986;GO:0030198;GO:0007179;GO:0007160;GO:0006936;GO:0001618;GO:0043235;GO:0035987;GO:0034684;GO:0045335;GO:0043149;GO:0090136	K06588-ko04151 PI3K-Akt signaling pathway;ko04512 ECM-receptor interaction;ko04145 Phagosome;ko04810 Regulation of actin cytoskeleton;ko04510 Focal adhesion;ko05205 Proteoglycans in cancer;ko05410 Hypertrophic cardiomyopathy (HCM);ko05412 Arrhythmogenic right ventricular cardiomyopathy (ARVC);ko05414 Dilated cardiomyopathy (DCM)	KOG1226-Integrin beta subunit (N-terminal portion of extracellular region)[TW]
ENSG00000130005	345.329	240.489	0.522003	1.31612e-139	2.74404e-138	-	GAMT	guanidinoacetate N-methyltransferase [Source:HGNC Symbol;Acc:HGNC:4136]	GO:0032259;GO:0016740;GO:0008168;GO:0005634;GO:0005737;GO:0005829;GO:0070062;GO:0006936;GO:0006600;GO:0006601;GO:0030731;GO:0046498;GO:0046500;GO:0040014;GO:0009887;GO:0007283	K00542-ko00260 Glycine, serine and threonine metabolism;ko00330 Arginine and proline metabolism	KOG1709-Guanidinoacetate methyltransferase and related proteins[E]
ENSG00000006625	2.16874	32.7217	-3.91532	2.18544e-139	4.55095e-138	down	GGCT	gamma-glutamylcyclotransferase [Source:HGNC Symbol;Acc:HGNC:21705]	GO:0003839;GO:0042803;GO:0005829;GO:0016746;GO:0016740;GO:0070062;GO:0001836;GO:0006750	K00682-ko00480 Glutathione metabolism	KOG4059-Uncharacterized conserved protein[S]
ENSG00000198431	2.95778	15.8982	-2.42627	2.3851e-139	4.96065e-138	down	TXNRD1	thioredoxin reductase 1 [Source:HGNC Symbol;Acc:HGNC:12437]	GO:0019216;GO:0034599;GO:0005515;GO:0045454;GO:0001650;GO:0055114;GO:0050660;GO:0016491;GO:0005654;GO:0005737;GO:0005634;GO:0016668;GO:0098869;GO:0009055;GO:0015035;GO:0004791;GO:0005739;GO:0005829;GO:0070062;GO:0007165;GO:0015949;GO:0001887;GO:0098625;GO:0098626;GO:0000305;GO:0005623	-	-
ENSG00000169398	6.97242	22.0519	-1.66117	2.89955e-139	6.02328e-138	down	PTK2	protein tyrosine kinase 2 [Source:HGNC Symbol;Acc:HGNC:9611]	GO:0004715;GO:0005515;GO:0005856;GO:0043547;GO:0005886;GO:0005829;GO:0005925;GO:0004713;GO:0004871;GO:0016310;GO:0016301;GO:0016740;GO:0006468;GO:0005524;GO:0000166;GO:0004672;GO:0016020;GO:0005737;GO:0005634;GO:0007275;GO:0030054;GO:0007229;GO:0005815;GO:0038096;GO:0045087;GO:0001890;GO:0038007;GO:0001934;GO:0042169;GO:0005938;GO:0000165;GO:0030335;GO:0007172;GO:0008360;GO:0008284;GO:0042127;GO:…	K05725-ko04012 ErbB signaling pathway;ko04370 VEGF signaling pathway;ko04151 PI3K-Akt signaling pathway;ko04810 Regulation of actin cytoskeleton;ko04510 Focal adhesion;ko04670 Leukocyte transendothelial migration;ko04062 Chemokine signaling pathway;ko04360 Axon guidance;ko05200 Pathways in cancer;ko05202 Transcriptional misregulation in cancers;ko05205 Proteoglycans in cancer;ko05222 Small cell l…	KOG4257-Focal adhesion tyrosine kinase FAK, contains FERM domain[T]
ENSG00000106588	0.900152	42.7127	-5.56835	2.97875e-139	6.18027e-138	down	PSMA2	proteasome subunit alpha 2 [Source:HGNC Symbol;Acc:HGNC:9531]	GO:0005839;GO:0000932;GO:0000502;GO:0006508;GO:0008233;GO:0005515;GO:0016787;GO:0005737;GO:0005634;GO:0006511;GO:0004175;GO:0004298;GO:0051603;GO:0019773;GO:0038095;GO:0005576;GO:0005829;GO:0070062;GO:0000165;GO:0000209;GO:0002223;GO:0002479;GO:0006521;GO:0010972;GO:0016579;GO:0031145;GO:0031146;GO:0033209;GO:0038061;GO:0043161;GO:0043488;GO:0050852;GO:0051437;GO:0055085;GO:0060071;GO:0061418;GO:…	K02726-ko03050 Proteasome	KOG0181-20S proteasome, regulatory subunit alpha type PSMA2/PRE8[O]
ENSG00000104856	22.1517	4.74982	2.22147	3.22294e-139	6.67877e-138	up	RELB	RELB proto-oncogene, NF-kB subunit [Source:HGNC Symbol;Acc:HGNC:9956]	GO:0005829;GO:0005634;GO:0071470;GO:0045892;GO:0045063;GO:0043011;GO:0042088;GO:0038061;GO:0032922;GO:0019882;GO:0010628;GO:0003677;GO:0001047;GO:0048511;GO:0005515;GO:0006355;GO:0006351;GO:0003700;GO:0006357;GO:0005654;GO:0005737;GO:0005856;GO:0005815;GO:0045087;GO:0003682;GO:0006954;GO:0045944;GO:0002223;GO:0000122;GO:0000981;GO:0000977;GO:0003714;GO:0034097;GO:0007249;GO:0032688;GO:0033256	K09253-ko04010 MAPK signaling pathway;ko04064 NF-kappa B signaling pathway;ko04380 Osteoclast differentiation;ko05166 HTLV-I infection;ko05169 Epstein-Barr virus infection	-
ENSG00000153113	4.83649	26.2583	-2.44074	3.41925e-139	7.07697e-138	down	CAST	calpastatin [Source:HGNC Symbol;Acc:HGNC:1515]	GO:0097340;GO:0010859;GO:0005515;GO:0005829;GO:0005783;GO:0003723;GO:0004869;GO:0030414;GO:0010466;GO:0045296;GO:0004866;GO:0016020;GO:2000675	-	-
ENSG00000140553	2.32263	17.1361	-2.8832	9.24687e-139	1.91154e-137	down	UNC45A	unc-45 myosin chaperone A [Source:HGNC Symbol;Acc:HGNC:30594]	GO:0005515;GO:0005829;GO:0005794;GO:0016607;GO:0005737;GO:0005634;GO:0007275;GO:0048471;GO:0030154;GO:0045296;GO:0007517;GO:0061077;GO:0051879	-	KOG4151-Myosin assembly protein/sexual cycle protein and related proteins[ODR]
ENSG00000164045	4.79947	20.2656	-2.07809	4.17657e-138	8.62347e-137	down	CDC25A	cell division cycle 25A [Source:HGNC Symbol;Acc:HGNC:1725]	GO:0005737;GO:0005634;GO:1902751;GO:0005515;GO:0004721;GO:0035335;GO:0006470;GO:0004725;GO:0051301;GO:0005622;GO:0016787;GO:0007049;GO:0005829;GO:0016579;GO:0005654;GO:0008283;GO:0000086;GO:0000082;GO:0006260;GO:0051087;GO:0019901;GO:0009314;GO:0000079;GO:0051726;GO:0034644	K06645-ko04110 Cell cycle;ko04914 Progesterone-mediated oocyte maturation;ko05206 MicroRNAs in cancer	KOG3772-M-phase inducer phosphatase[D]
ENSG00000157106	0.992737	4.62267	-2.21924	5.23536e-138	1.07965e-136	-	SMG1	SMG1, nonsense mediated mRNA decay associated PI3K related kinase [Source:HGNC Symbol;Acc:HGNC:30045]	GO:0005515;GO:0000184;GO:0016301;GO:0016310;GO:0016740;GO:0005654;GO:0005524;GO:0004674;GO:0000166;GO:0046872;GO:0005737;GO:0005634;GO:0003723;GO:0006281;GO:0006974;GO:0006406;GO:0005829;GO:0004672;GO:0046777;GO:0006950;GO:0042162;GO:0032204;GO:0018105;GO:0046854;GO:0006468	K08873-ko03015 mRNA surveillance pathway	KOG0891-DNA-dependent protein kinase[L]
ENSG00000132912	1.27052	8.35321	-2.71691	6.83824e-138	1.4085e-136	down	DCTN4	dynactin subunit 4 [Source:HGNC Symbol;Acc:HGNC:15518]	GO:0005515;GO:0005737;GO:0005856;GO:0005813;GO:0005815;GO:0005869;GO:0005829;GO:0019886;GO:0005634;GO:0047485;GO:0006888;GO:0005868;GO:0007097	K10426-ko04962 Vasopressin-regulated water reabsorption;ko05016 Huntington's disease	KOG3896-Dynactin, subunit p62[N]
ENSG00000105662	12.274	4.28417	1.51851	8.47585e-138	1.74369e-136	up	CRTC1	CREB regulated transcription coactivator 1 [Source:HGNC Symbol;Acc:HGNC:16062]	GO:0048511;GO:0016604;GO:0005515;GO:0051289;GO:0005886;GO:0006355;GO:0006351;GO:0005654;GO:0005829;GO:0005737;GO:0005634;GO:0045944;GO:0032793;GO:0008140;GO:0016032;GO:0043153;GO:0045202;GO:0043025;GO:0030425;GO:1902631;GO:1900273;GO:1900006;GO:0097009;GO:0007613	K15309-ko05166 HTLV-I infection	-
ENSG00000187951	2.801	23.6196	-3.07597	8.57742e-138	1.76246e-136	down	ARHGAP11B	Rho GTPase activating protein 11B [Source:HGNC Symbol;Acc:HGNC:15782]	GO:0043547;GO:0007165;GO:0005829;GO:0005096;GO:0051056;GO:0021987	-	KOG2710-Rho GTPase-activating protein[TZ]
ENSG00000215021	175.786	65.1649	1.43165	9.91307e-138	2.03445e-136	up	PHB2	prohibitin 2 [Source:HGNC Symbol;Acc:HGNC:30306]	GO:0016020;GO:0009986;GO:0005743;GO:0005739;GO:0005634;GO:0060762;GO:0060749;GO:0060744;GO:0045892;GO:0033600;GO:0033147;GO:0006851;GO:0005515;GO:0006355;GO:0006351;GO:0005737;GO:0005741;GO:0070062;GO:0071944;GO:0030331;GO:0050821;GO:0008022;GO:0047485;GO:0043066;GO:0070374;GO:0043433;GO:0016363;GO:0043234;GO:0051091;GO:0031536;GO:0007005;GO:0007062;GO:0000060;GO:1902808;GO:0033218	-	KOG3090-Prohibitin-like protein[O]
ENSG00000111843	2.19408	34.2475	-3.96431	1.27515e-137	2.61384e-136	down	TMEM14C	transmembrane protein 14C [Source:HGNC Symbol;Acc:HGNC:20952]	GO:0005515;GO:0005739;GO:0016020;GO:0016021;GO:0006783;GO:0031966	-	KOG4267-Predicted membrane protein[S]
ENSG00000135052	4.73477	20.3759	-2.1055	1.52099e-137	3.114e-136	down	GOLM1	golgi membrane protein 1 [Source:HGNC Symbol;Acc:HGNC:15451]	GO:0005794;GO:0019216;GO:0006997;GO:0016021;GO:0016020;GO:0005615;GO:0005515;GO:0070062;GO:0044267;GO:0005887;GO:0005788;GO:0043687	-	-
ENSG00000156381	40.893	7.83205	2.38439	1.66152e-137	3.39764e-136	up	ANKRD9	ankyrin repeat domain 9 [Source:HGNC Symbol;Acc:HGNC:20096]	GO:0005829;GO:0043687	-	KOG0504-FOG: Ankyrin repeat[R]
ENSG00000167747	894.981	801.68	0.158831	2.35373e-137	4.80736e-136	-	C19orf48	chromosome 19 open reading frame 48 [Source:HGNC Symbol;Acc:HGNC:29667]	-	-	-
ENSG00000138835	0.733385	20.7698	-4.82378	2.70038e-137	5.50877e-136	down	RGS3	regulator of G protein signaling 3 [Source:HGNC Symbol;Acc:HGNC:9999]	GO:0005634;GO:0005515;GO:0043547;GO:0005886;GO:0005654;GO:0005829;GO:0016020;GO:0005737;GO:0009968;GO:0005096;GO:0008277;GO:0000188	K07524-ko04360 Axon guidance	KOG3589-G protein signaling regulators[T]
ENSG00000140464	23.4686	11.7072	1.00333	2.95453e-137	6.02003e-136	up	PML	promyelocytic leukemia [Source:HGNC Symbol;Acc:HGNC:9113]	GO:0032183;GO:0048511;GO:0005515;GO:0005829;GO:0005622;GO:0006355;GO:0006351;GO:0003677;GO:0005789;GO:0005783;GO:0046872;GO:0008270;GO:0016020;GO:0005737;GO:0005634;GO:0006915;GO:0031901;GO:0005654;GO:0002376;GO:0045087;GO:0005730;GO:0051607;GO:0005768;GO:0000784;GO:0001666;GO:0031625;GO:0016032;GO:0042803;GO:0031965;GO:0030308;GO:0045892;GO:1901796;GO:0043161;GO:0032922;GO:0016605;GO:0016525;GO:…	K10054-ko04120 Ubiquitin mediated proteolysis;ko04144 Endocytosis;ko05200 Pathways in cancer;ko05202 Transcriptional misregulation in cancers;ko05221 Acute myeloid leukemia;ko05164 Influenza A;ko05168 Herpes simplex infection	KOG2177-Predicted E3 ubiquitin ligase[O]
ENSG00000118046	115.957	72.7248	0.673071	9.57023e-137	1.94766e-135	-	STK11	serine/threonine kinase 11 [Source:HGNC Symbol;Acc:HGNC:11389]	GO:0036398;GO:0016020;GO:0005829;GO:0005737;GO:0005634;GO:0097484;GO:1900182;GO:0071902;GO:0071493;GO:0060770;GO:0060070;GO:0051896;GO:0051055;GO:0051645;GO:0050852;GO:0050731;GO:0050772;GO:0048814;GO:0046777;GO:0042593;GO:0045059;GO:0036399;GO:0032147;GO:0030511;GO:0030308;GO:0030111;GO:0030010;GO:0010212;GO:0008285;GO:0007409;GO:0006974;GO:0006468;GO:0001944;GO:0001894;GO:0001558;GO:0030295;GO:…	K07298-ko04068 FoxO signaling pathway;ko04151 PI3K-Akt signaling pathway;ko04152 AMPK signaling pathway;ko04150 mTOR signaling pathway;ko04920 Adipocytokine signaling pathway;ko04211 Longevity regulating pathway - mammal	KOG0583-Serine/threonine protein kinase[T]
ENSG00000062194	0.432718	12.1696	-4.81371	1.21711e-136	2.47401e-135	down	GPBP1	GC-rich promoter binding protein 1 [Source:HGNC Symbol;Acc:HGNC:29520]	GO:0005634;GO:0045893;GO:0003700;GO:0003677;GO:0006351;GO:0005886;GO:0005829;GO:0043231;GO:0005515;GO:0006355;GO:0005737	-	-
ENSG00000246705	502.16	331.675	0.598374	1.27412e-136	2.58681e-135	-	H2AFJ	H2A histone family member J [Source:HGNC Symbol;Acc:HGNC:14456]	GO:0005694;GO:0000786;GO:0046982;GO:0003677;GO:0005634;GO:0000790;GO:0003674;GO:0008150;GO:0070062;GO:0006342	K11251-ko05322 Systemic lupus erythematosus;ko05034 Alcoholism	KOG1756-Histone 2A[B]
ENSG00000134001	2.16094	12.2007	-2.49724	2.07116e-136	4.20002e-135	down	EIF2S1	eukaryotic translation initiation factor 2 subunit alpha [Source:HGNC Symbol;Acc:HGNC:3265]	GO:0097451;GO:0044207;GO:0010494;GO:0005850;GO:0005737;GO:0005634;GO:2000676;GO:1990737;GO:1905098;GO:1901216;GO:0046777;GO:0043558;GO:0034976;GO:0034644;GO:0034605;GO:0034198;GO:0032057;GO:0007568;GO:0006412;GO:0005515;GO:0006413;GO:0003743;GO:0016020;GO:0003723;GO:0003676;GO:0043022;GO:0005829;GO:0070062;GO:0055085;GO:0006417;GO:0005840;GO:0005851;GO:0036499;GO:0005844;GO:0033290;GO:0043614	K03237-ko03013 RNA transport;ko04141 Protein processing in endoplasmic reticulum;ko04210 Apoptosis;ko04932 Non-alcoholic fatty liver disease (NAFLD);ko05162 Measles;ko05164 Influenza A;ko05160 Hepatitis C;ko05168 Herpes simplex infection	KOG2916-Translation initiation factor 2, alpha subunit (eIF-2alpha)[J]
ENSG00000133704	3.96134	7.00189	-0.821755	2.88993e-136	5.8534e-135	-	IPO8	importin 8 [Source:HGNC Symbol;Acc:HGNC:9853]	GO:0060964;GO:0005515;GO:0015031;GO:0006886;GO:0005737;GO:0005634;GO:0006810;GO:0008536;GO:0005829;GO:0005654;GO:0007165;GO:0005622	-	KOG1991-Nuclear transport receptor RANBP7/RANBP8 (importin beta superfamily)[YU]
ENSG00000157978	10.1212	1.01617	3.31616	1.19042e-135	2.40826e-134	up	LDLRAP1	low density lipoprotein receptor adaptor protein 1 [Source:HGNC Symbol;Acc:HGNC:18640]	GO:0030424;GO:0005883;GO:0005769;GO:0005737;GO:0042632;GO:0001540;GO:0005515;GO:0005829;GO:0006629;GO:0009967;GO:0006810;GO:0008202;GO:0008203;GO:0005886;GO:0006897;GO:0061024;GO:0009925;GO:0048260;GO:0009898;GO:0030665;GO:0030159;GO:0030276;GO:0030121;GO:0035615;GO:0030122;GO:0034383;GO:0090118;GO:0055037;GO:0050750;GO:0006898;GO:1905602;GO:0001784;GO:0090003;GO:0005546;GO:0031623;GO:0043393;GO:…	K12474-ko04144 Endocytosis	KOG3536-Adaptor protein CED-6, contains PTB domain[R]
ENSG00000175203	30.7453	15.5189	0.986337	1.5864e-135	3.20554e-134	-	DCTN2	dynactin subunit 2 [Source:HGNC Symbol;Acc:HGNC:2712]	GO:0005515;GO:0005813;GO:0005829;GO:0016020;GO:0005737;GO:0005856;GO:0005874;GO:0003774;GO:0005815;GO:0007017;GO:0042802;GO:0000776;GO:0005869;GO:0070062;GO:0008283;GO:0000086;GO:0097711;GO:0019886;GO:0031982;GO:0006888;GO:0030507;GO:0030286;GO:0007052;GO:0000278;GO:0071539;GO:0030426;GO:0032402	K10424-ko04962 Vasopressin-regulated water reabsorption;ko05016 Huntington's disease	KOG3958-Putative dynamitin[Z]
ENSG00000113161	1.06467	15.5208	-3.86572	1.6142e-135	3.25785e-134	down	HMGCR	3-hydroxy-3-methylglutaryl-CoA reductase [Source:HGNC Symbol;Acc:HGNC:5006]	GO:0019216;GO:0045540;GO:0005789;GO:0005515;GO:0016616;GO:0008299;GO:0006629;GO:0005783;GO:0055114;GO:0050661;GO:0016491;GO:0016021;GO:0016020;GO:0008202;GO:0008203;GO:0004420;GO:0050662;GO:0015936;GO:0005778;GO:0006694;GO:0006695;GO:0016126;GO:0051262;GO:0070402;GO:0042282;GO:0043231;GO:0097756;GO:0070374;GO:0061179;GO:0061045;GO:0048661;GO:0048643;GO:0045471;GO:0045445;GO:0043407;GO:0043066;GO:…	K00021-ko00900 Terpenoid backbone biosynthesis;ko04152 AMPK signaling pathway;ko04976 Bile secretion	KOG2480-3-hydroxy-3-methylglutaryl-CoA (HMG-CoA) reductase[I]
ENSG00000083444	25.6483	8.02867	1.67563	2.32956e-135	4.69606e-134	up	PLOD1	procollagen-lysine,2-oxoglutarate 5-dioxygenase 1 [Source:HGNC Symbol;Acc:HGNC:9081]	GO:0046947;GO:0017185;GO:0008475;GO:0031418;GO:0016705;GO:0005506;GO:0042803;GO:0005783;GO:0055114;GO:0016491;GO:0046872;GO:0016020;GO:0051213;GO:0005789;GO:0070062;GO:0001666;GO:0006464;GO:0030867;GO:0008544	K00473-ko00310 Lysine degradation	KOG1971-Lysyl hydroxylase[O]
ENSG00000122644	0.233478	22.9986	-6.62212	2.41397e-135	4.86047e-134	down	ARL4A	ADP ribosylation factor like GTPase 4A [Source:HGNC Symbol;Acc:HGNC:695]	GO:0005515;GO:0005886;GO:0005525;GO:0005622;GO:0005654;GO:0005829;GO:0000166;GO:0007264;GO:0016020;GO:0005737;GO:0005634;GO:0005730;GO:0050873	-	KOG0070-GTP-binding ADP-ribosylation factor Arf1[U]
ENSG00000163714	0.04006	13.9478	-8.44366	3.56928e-135	7.17818e-134	down	U2SURP	U2 snRNP associated SURP domain containing [Source:HGNC Symbol;Acc:HGNC:30855]	GO:0003676;GO:0005515;GO:0005654;GO:0005634;GO:0006396;GO:0003723;GO:0000398	K12842-ko03040 Spliceosome	KOG0151-Predicted splicing regulator, contains RRM, SWAP and RPR domains[R]
ENSG00000091140	0.332909	13.9586	-5.38989	9.81593e-135	1.97175e-133	down	DLD	dihydrolipoamide dehydrogenase [Source:HGNC Symbol;Acc:HGNC:2898]	GO:0034641;GO:0045254;GO:0045252;GO:0043209;GO:0043159;GO:0005929;GO:0005739;GO:0051068;GO:0048240;GO:0042391;GO:0007568;GO:0009106;GO:0006508;GO:0007369;GO:0006120;GO:0006103;GO:0006086;GO:0051287;GO:0050660;GO:0043544;GO:0004148;GO:0045454;GO:0031514;GO:0055114;GO:0016491;GO:0005654;GO:0005759;GO:0016668;GO:0031410;GO:0042995;GO:0006554;GO:0001669;GO:0034604;GO:0006090;GO:0010510;GO:0061732;GO:…	K00382-ko01200 Carbon metabolism;ko00010 Glycolysis / Gluconeogenesis;ko00020 Citrate cycle (TCA cycle);ko00620 Pyruvate metabolism;ko00630 Glyoxylate and dicarboxylate metabolism;ko00640 Propanoate metabolism;ko00260 Glycine, serine and threonine metabolism;ko00280 Valine, leucine and isoleucine degradation	KOG1335-Dihydrolipoamide dehydrogenase[C]
ENSG00000108946	7.10689	33.0783	-2.2186	1.28203e-134	2.57222e-133	down	PRKAR1A	protein kinase cAMP-dependent type I regulatory subunit alpha [Source:HGNC Symbol;Acc:HGNC:9388]	GO:0005515;GO:0005886;GO:0016310;GO:0016301;GO:0000166;GO:0016020;GO:0005737;GO:0008603;GO:0030552;GO:0001932;GO:0005952;GO:0005829;GO:0031625;GO:0046007;GO:0006357;GO:0035556;GO:0007596;GO:0001772;GO:0034236;GO:0003091;GO:0034199;GO:0071377;GO:0097546;GO:0004862;GO:2000480;GO:0031588;GO:0043234;GO:0044853;GO:0031594;GO:0060038;GO:0045859;GO:0045835;GO:0045214;GO:0007507;GO:0007143;GO:0006469;GO:…	K04739-ko04910 Insulin signaling pathway	KOG1113-cAMP-dependent protein kinase types I and II, regulatory subunit[T]
ENSG00000197746	296.263	246.111	0.267568	1.32906e-134	2.66344e-133	-	PSAP	prosaposin [Source:HGNC Symbol;Acc:HGNC:9498]	GO:1905572;GO:1905577;GO:1905576;GO:1905575;GO:1905574;GO:1905573;GO:0005543;GO:0004565;GO:0005739;GO:0005615;GO:1903206;GO:0071310;GO:0060742;GO:0060736;GO:0048589;GO:0043410;GO:0043408;GO:0019216;GO:0007193;GO:0001664;GO:0042803;GO:0005576;GO:0005515;GO:0043085;GO:0005764;GO:0006665;GO:0006629;GO:0043231;GO:0005886;GO:0006687;GO:0070062;GO:0043312;GO:0016021;GO:0002576;GO:0035577;GO:0043202;GO:…	K12382-ko04142 Lysosome	KOG1340-Prosaposin[IG]
ENSG00000162496	122.412	70.621	0.793573	3.67544e-134	7.35693e-133	-	DHRS3	dehydrogenase/reductase 3 [Source:HGNC Symbol;Acc:HGNC:17693]	GO:0060411;GO:0060349;GO:0060021;GO:0048387;GO:0030278;GO:0003151;GO:0001523;GO:0004745;GO:0055114;GO:0016491;GO:0016021;GO:0016020;GO:0042572;GO:0005789;GO:0007601;GO:0009055;GO:0000166;GO:0052650;GO:0042622	K11146-ko00830 Retinol metabolism	KOG1201-Hydroxysteroid 17-beta dehydrogenase 11[Q]
ENSG00000011007	1.04037	13.5347	-3.70149	3.69459e-134	7.38659e-133	down	ELOA	elongin A [Source:HGNC Symbol;Acc:HGNC:11620]	GO:0005515;GO:0006355;GO:0006351;GO:0016021;GO:0005634;GO:0005615;GO:0005654;GO:0006368;GO:0070449;GO:0006366;GO:0006357;GO:0003746;GO:0006414	-	KOG2821-RNA polymerase II transcription elongation factor Elongin/SIII, subunit elongin A[K]
ENSG00000197249	8.5652	0.417493	4.35866	3.86338e-134	7.71498e-133	up	SERPINA1	serpin family A member 1 [Source:HGNC Symbol;Acc:HGNC:8941]	GO:0005576;GO:0005515;GO:0010951;GO:0005794;GO:0005783;GO:0043231;GO:0005615;GO:0005578;GO:0030414;GO:0010466;GO:0042802;GO:0000139;GO:0070062;GO:0044267;GO:0004867;GO:0043312;GO:0006953;GO:0002576;GO:0002020;GO:1904813;GO:0007596;GO:0007599;GO:0031093;GO:0006888;GO:0048208;GO:0005788;GO:0033116;GO:0043687;GO:0030134;GO:0001948	K03984-ko04610 Complement and coagulation cascades	KOG2392-Serpin[V]
ENSG00000154473	8.24345	33.5803	-2.0263	5.46955e-134	1.09096e-132	down	BUB3	BUB3, mitotic checkpoint protein [Source:HGNC Symbol;Acc:HGNC:1151]	GO:0071173;GO:0051983;GO:0007059;GO:0000070;GO:0005515;GO:0005694;GO:0051301;GO:0005654;GO:0005634;GO:0007049;GO:0051321;GO:0000775;GO:0000776;GO:0000777;GO:0005829;GO:0031145;GO:0043161;GO:0051437;GO:0007062;GO:0051436;GO:0042787;GO:0008608	K02180-ko04110 Cell cycle;ko04111 Cell cycle - yeast;ko05166 HTLV-I infection	KOG1036-Mitotic spindle checkpoint protein BUB3, WD repeat superfamily[D]
ENSG00000077232	0.108306	3.95312	-5.18981	7.17479e-134	1.42942e-132	-	DNAJC10	DnaJ heat shock protein family (Hsp40) member C10 [Source:HGNC Symbol;Acc:HGNC:24637]	GO:0005783;GO:0032781;GO:0030433;GO:0051117;GO:0051087;GO:0016671;GO:0015036;GO:0015035;GO:0001671;GO:0045454;GO:0055114;GO:0016491;GO:0016020;GO:0005788;GO:0005515;GO:0001933;GO:0034976;GO:0070059;GO:0051787;GO:0034663;GO:0030544;GO:0034975;GO:0005623;GO:0016021	K09530-ko04141 Protein processing in endoplasmic reticulum	KOG0191-Thioredoxin/protein disulfide isomerase[O]
ENSG00000080986	1.57062	18.38	-3.54873	1.33531e-133	2.6572e-132	down	NDC80	NDC80, kinetochore complex component [Source:HGNC Symbol;Acc:HGNC:16909]	GO:1905342;GO:0051383;GO:0000278;GO:0005515;GO:0005813;GO:0005694;GO:0051301;GO:0005654;GO:0016020;GO:0005634;GO:0007049;GO:0042802;GO:0007059;GO:0000775;GO:0000776;GO:0000777;GO:0005829;GO:0005200;GO:0007052;GO:0007062;GO:0000070;GO:0000132;GO:0008608;GO:0051310;GO:0051315;GO:0090267;GO:0000942;GO:0031262	-	KOG0995-Centromere-associated protein HEC1[D]
ENSG00000146909	2.54125	8.38178	-1.72172	1.4582e-133	2.89837e-132	down	NOM1	nucleolar protein with MIF4G domain 1 [Source:HGNC Symbol;Acc:HGNC:13244]	GO:0048820;GO:0005515;GO:0005730;GO:0005634;GO:0003723;GO:0042274;GO:0008150;GO:0022008	-	KOG2141-Protein involved in high osmolarity signaling pathway[T]
ENSG00000175048	4.08861	0.20966	4.28549	3.81052e-133	7.56508e-132	-	ZDHHC14	zinc finger DHHC-type containing 14 [Source:HGNC Symbol;Acc:HGNC:20341]	GO:0019706;GO:0016746;GO:0005783;GO:0016740;GO:0016021;GO:0016020;GO:0016409;GO:0018345	K16675-ko04391 Hippo signaling pathway -fly	KOG1311-DHHC-type Zn-finger proteins[R]
ENSG00000131435	41.3506	9.58688	2.10877	4.31375e-133	8.55417e-132	up	PDLIM4	PDZ and LIM domain 4 [Source:HGNC Symbol;Acc:HGNC:16501]	GO:0046872;GO:0008270;GO:0005515	-	KOG1703-Adaptor protein Enigma and related PDZ-LIM proteins[TZ]
ENSG00000113312	0.162707	23.4989	-7.17417	5.3315e-133	1.05601e-131	down	TTC1	tetratricopeptide repeat domain 1 [Source:HGNC Symbol;Acc:HGNC:12391]	GO:0005515;GO:0005829;GO:0005778;GO:0006457;GO:0051082	-	KOG4234-TPR repeat-containing protein[R]
ENSG00000167699	1.09653	16.8005	-3.93749	7.08784e-133	1.40226e-131	down	GLOD4	glyoxalase domain containing 4 [Source:HGNC Symbol;Acc:HGNC:14111]	GO:0005739;GO:0045296;GO:0070062	-	-
ENSG00000099194	11.5977	28.7902	-1.31174	7.14021e-133	1.41098e-131	down	SCD	stearoyl-CoA desaturase [Source:HGNC Symbol;Acc:HGNC:10571]	GO:0046949;GO:0045540;GO:0006633;GO:0006631;GO:0006629;GO:0005789;GO:0005783;GO:0055114;GO:0016491;GO:0005730;GO:0046872;GO:0016021;GO:0016020;GO:0005506;GO:0006636;GO:0004768;GO:0016717	K00507-ko01212 Fatty acid metabolism;ko01040 Biosynthesis of unsaturated fatty acids;ko04152 AMPK signaling pathway;ko03320 PPAR signaling pathway;ko04212 Longevity regulating pathway - worm	KOG1600-Fatty acid desaturase[I]
ENSG00000143079	0.231263	5.62362	-4.60389	9.07097e-133	1.79044e-131	down	CTTNBP2NL	CTTNBP2 N-terminal like [Source:HGNC Symbol;Acc:HGNC:25330]	GO:0006470;GO:0005515;GO:0005737;GO:0005856;GO:0015629;GO:0051721;GO:0032410;GO:0034763	-	KOG1103-Predicted coiled-coil protein[S]
ENSG00000162302	14.5116	35.1628	-1.27685	1.22554e-132	2.41618e-131	down	RPS6KA4	ribosomal protein S6 kinase A4 [Source:HGNC Symbol;Acc:HGNC:10433]	GO:0035556;GO:0016310;GO:0016301;GO:0000287;GO:0016740;GO:0005654;GO:0005829;GO:0006468;GO:0005524;GO:0004674;GO:0000166;GO:0004672;GO:0005515;GO:0006355;GO:0046872;GO:0005634;GO:0006954;GO:0005737;GO:0045944;GO:0051092;GO:0070498;GO:0001818;GO:0016572;GO:0032793;GO:0033129;GO:0035066;GO:0043987;GO:0043988;GO:0004711	K16510-ko04010 MAPK signaling pathway;ko04668 TNF signaling pathway	KOG0598-Ribosomal protein S6 kinase and related proteins[RT]
ENSG00000200087	35.2594	245.442	-2.7993	2.08388e-132	4.10369e-131	down	SNORA73B	small nucleolar RNA, H/ACA box 73B [Source:HGNC Symbol;Acc:HGNC:10116]	-	-	-
ENSG00000164405	564.209	419.481	0.427624	2.56852e-132	5.05221e-131	-	UQCRQ	ubiquinol-cytochrome c reductase complex III subunit VII [Source:HGNC Symbol;Acc:HGNC:29594]	GO:0005743;GO:0005739;GO:0030901;GO:0021860;GO:0021854;GO:0021794;GO:0021766;GO:0021680;GO:0021548;GO:0021539;GO:1902600;GO:0055114;GO:0016020;GO:0070469;GO:0008121;GO:0006122;GO:0005750	K00418-ko00190 Oxidative phosphorylation;ko04260 Cardiac muscle contraction;ko05010 Alzheimer's disease;ko05012 Parkinson's disease;ko05016 Huntington's disease;ko04932 Non-alcoholic fatty liver disease (NAFLD)	KOG4116-Ubiquinol cytochrome c reductase, subunit QCR8[C]
ENSG00000163527	4.27807	14.7681	-1.78746	6.0453e-132	1.18772e-130	down	STT3B	STT3B, catalytic subunit of the oligosaccharyltransferase complex [Source:HGNC Symbol;Acc:HGNC:30611]	GO:0006486;GO:0016757;GO:0005789;GO:0005783;GO:0016740;GO:0046872;GO:0016020;GO:0016021;GO:0018279;GO:0004576;GO:0006986;GO:0004579;GO:0030433;GO:0008250;GO:0043686;GO:0006516;GO:0043687	K07151-ko00510 N-Glycan biosynthesis;ko00513 Various types of N-glycan biosynthesis;ko04141 Protein processing in endoplasmic reticulum	KOG2292-Oligosaccharyltransferase, STT3 subunit[O]
ENSG00000204991	16.6066	3.91834	2.08345	6.62142e-132	1.29942e-130	up	SPIRE2	spire type actin nucleation factor 2 [Source:HGNC Symbol;Acc:HGNC:30623]	GO:0005886;GO:0005829;GO:0003779;GO:0016192;GO:0015031;GO:0016020;GO:0005737;GO:0006810;GO:0048471;GO:0005856;GO:0045010;GO:0030659;GO:0031410;GO:0005938;GO:0032154;GO:0030036;GO:0046907;GO:0036089;GO:0040038;GO:0051295;GO:0070649	K02098-ko04320 Dorso-ventral axis formation	-
ENSG00000147155	309.763	102.347	1.5977	6.73355e-132	1.3199e-130	up	EBP	emopamil binding protein (sterol isomerase) [Source:HGNC Symbol;Acc:HGNC:3133]	GO:0043231;GO:0030097;GO:0016126;GO:0006695;GO:0000247;GO:0005515;GO:0006629;GO:0005789;GO:0005783;GO:0016125;GO:0047750;GO:0016853;GO:0016021;GO:0016020;GO:0005634;GO:0031410;GO:0008202;GO:0008203;GO:0007165;GO:0006694;GO:0005887;GO:0001501;GO:0006855;GO:0004888;GO:0005635;GO:0033489;GO:0033490;GO:0004769;GO:0015238	K01824-ko00100 Steroid biosynthesis	KOG4826-C-8,7 sterol isomerase[I]
ENSG00000153147	0.01257	4.88409	-8.60196	1.38313e-131	2.70808e-130	-	SMARCA5	SWI/SNF related, matrix associated, actin dependent regulator of chromatin, subfamily a, member 5 [Source:HGNC Symbol;Acc:HGNC:11101]	GO:0031010;GO:0005677;GO:0005634;GO:0045893;GO:0006338;GO:0006333;GO:0006302;GO:0000183;GO:0043044;GO:0005515;GO:0016569;GO:0006334;GO:0001650;GO:0003677;GO:0016818;GO:0004386;GO:0016787;GO:0005524;GO:0000166;GO:0003676;GO:0016887;GO:0031491;GO:0016589;GO:0005654;GO:0034080;GO:0045815;GO:0042393;GO:0006352;GO:0006357;GO:0043596;GO:0016584;GO:0000793;GO:0031213	-	KOG0385-Chromatin remodeling complex WSTF-ISWI, small subunit[K]
ENSG00000132842	0.417112	14.927	-5.16135	1.4474e-131	2.83065e-130	down	AP3B1	adaptor related protein complex 3 beta 1 subunit [Source:HGNC Symbol;Acc:HGNC:566]	GO:0051138;GO:0048490;GO:0048007;GO:0019882;GO:0008089;GO:0007596;GO:0006622;GO:1904115;GO:0030131;GO:0005765;GO:0005794;GO:0030117;GO:0016192;GO:0015031;GO:0006886;GO:0016020;GO:0006810;GO:0031410;GO:0030123;GO:0019903;GO:0030742;GO:0032438;GO:0030665	K12397-ko04142 Lysosome	KOG1060-Vesicle coat complex AP-3, beta subunit[U]
ENSG00000136810	82.3067	194.994	-1.24435	1.4726e-131	2.87663e-130	down	TXN	thioredoxin [Source:HGNC Symbol;Acc:HGNC:12435]	GO:0034599;GO:0005576;GO:0005515;GO:0045454;GO:0006355;GO:0006351;GO:0055114;GO:0005829;GO:0005634;GO:0005737;GO:0003723;GO:0098869;GO:0015035;GO:0006662;GO:0070062;GO:0007165;GO:0007267;GO:0051897;GO:0006928;GO:0008283;GO:0015949;GO:1903206;GO:0009314;GO:0033158;GO:0004791;GO:0016671;GO:0047134;GO:0043388;GO:0030091;GO:0032148;GO:0033138;GO:0005739;GO:0046826;GO:0000122;GO:0015037	-	KOG0907-Thioredoxin[O]
ENSG00000101132	1.06927	22.9586	-4.42434	1.74186e-131	3.39871e-130	down	PFDN4	prefoldin subunit 4 [Source:HGNC Symbol;Acc:HGNC:8868]	GO:0005515;GO:0005739;GO:0006457;GO:0005829;GO:0005737;GO:0005634;GO:0051082;GO:0016272;GO:0051087	-	KOG1760-Molecular chaperone Prefoldin, subunit 4[O]
ENSG00000144029	64.3036	81.1455	-0.335613	2.0931e-131	4.07938e-130	-	MRPS5	mitochondrial ribosomal protein S5 [Source:HGNC Symbol;Acc:HGNC:14498]	GO:0005739;GO:0005840;GO:0006412;GO:0003735;GO:0030529;GO:0003723;GO:0005763;GO:0005743;GO:0070125;GO:0070126	K02988-ko03010 Ribosome	KOG2646-Ribosomal protein S5[J]
ENSG00000150760	0.092701	4.56772	-5.62274	3.16005e-131	6.15181e-130	-	DOCK1	dedicator of cytokinesis 1 [Source:HGNC Symbol;Acc:HGNC:2987]	GO:0005737;GO:0005515;GO:0005096;GO:0043547;GO:0007264;GO:0016020;GO:0006915;GO:0016477;GO:0005085;GO:0038096;GO:0007010;GO:0005829;GO:0017124;GO:0007165;GO:0006909;GO:0048010;GO:0005089;GO:0007596;GO:0010634;GO:0007229;GO:1900026;GO:0006911;GO:0032045;GO:0002244;GO:0005622	K13708-ko04810 Regulation of actin cytoskeleton;ko04510 Focal adhesion;ko05131 Shigellosis;ko05100 Bacterial invasion of epithelial cells	KOG1998-Signaling protein DOCK180[T]
ENSG00000137310	3.85112	19.0749	-2.30832	4.49615e-131	8.74286e-130	down	TCF19	transcription factor 19 [Source:HGNC Symbol;Acc:HGNC:11629]	GO:0006355;GO:0006351;GO:0046872;GO:0008270;GO:0005634;GO:0003700;GO:0006357;GO:0008283	-	-
ENSG00000151366	6.12496	61.9586	-3.33853	5.7241e-131	1.11179e-129	down	NDUFC2	NADH:ubiquinone oxidoreductase subunit C2 [Source:HGNC Symbol;Acc:HGNC:7706]	GO:0005743;GO:0005739;GO:0055114;GO:0016021;GO:0016020;GO:0070469;GO:0008137;GO:0006120;GO:0005886;GO:0005737;GO:0043312;GO:0032981;GO:0005747;GO:0035577	K03968-ko00190 Oxidative phosphorylation;ko05010 Alzheimer's disease;ko05012 Parkinson's disease;ko05016 Huntington's disease;ko04932 Non-alcoholic fatty liver disease (NAFLD)	KOG4516-NADH:ubiquinone oxidoreductase, NDUFC2/B14.5B subunit[C]
ENSG00000104517	1.30006	9.8959	-2.92826	7.20772e-131	1.39836e-129	down	UBR5	ubiquitin protein ligase E3 component n-recognin 5 [Source:HGNC Symbol;Acc:HGNC:16806]	GO:0043130;GO:0005515;GO:0004842;GO:0016567;GO:0016740;GO:0005654;GO:0005829;GO:0046872;GO:0008270;GO:0016020;GO:0005634;GO:0003723;GO:0006281;GO:0006974;GO:0043234;GO:0008283;GO:0006511;GO:0000209;GO:0090263;GO:0034450;GO:0010628;GO:0033160;GO:0035413;GO:0050847;GO:1901315;GO:2000780;GO:0048471	K10593-ko04120 Ubiquitin mediated proteolysis	KOG0943-Predicted ubiquitin-protein ligase/hyperplastic discs protein, HECT superfamily[O]
ENSG00000101441	264.658	152.992	0.790679	7.70542e-131	1.49322e-129	-	CST4	cystatin S [Source:HGNC Symbol;Acc:HGNC:2476]	GO:0004869;GO:0005576;GO:0010951;GO:0005615;GO:0030414;GO:0010466;GO:0070062;GO:0001895;GO:0045861;GO:0001580	K13900-ko04970 Salivary secretion	-
ENSG00000185024	15.5942	5.1813	1.58962	9.59463e-131	1.85721e-129	up	BRF1	BRF1, RNA polymerase III transcription initiation factor subunit [Source:HGNC Symbol;Acc:HGNC:11551]	GO:0070897;GO:0006355;GO:0006351;GO:0046872;GO:0006413;GO:0003743;GO:0005634;GO:0017025;GO:0000126;GO:0001026;GO:0005654;GO:0006383;GO:0009303;GO:0006384;GO:0006359;GO:0009304;GO:0045945	-	KOG1598-Transcription initiation factor TFIIIB, Brf1 subunit[K]
ENSG00000105618	421.784	308.086	0.453171	1.09116e-130	2.10973e-129	-	PRPF31	pre-mRNA processing factor 31 [Source:HGNC Symbol;Acc:HGNC:15446]	GO:0046540;GO:0005515;GO:0005681;GO:0030529;GO:0005634;GO:0016607;GO:0008380;GO:0006397;GO:0003723;GO:0000398;GO:0005654;GO:0000244;GO:0071339;GO:0015030;GO:0030621;GO:0071011;GO:0043021;GO:0030622;GO:0005687;GO:0070990;GO:0071166;GO:0005684;GO:0005690	K12844-ko03040 Spliceosome	KOG2574-mRNA splicing factor PRP31[A]
ENSG00000222041	751.172	553.238	0.441243	1.25793e-130	2.42944e-129	-	CYTOR	cytoskeleton regulator RNA [Source:HGNC Symbol;Acc:HGNC:28717]	-	-	-
ENSG00000103855	13.0375	2.14954	2.60057	1.52732e-130	2.94636e-129	up	CD276	CD276 molecule [Source:HGNC Symbol;Acc:HGNC:19137]	GO:0006955;GO:0016021;GO:0016020;GO:0005515;GO:0070062;GO:0008283;GO:0042110;GO:0005102;GO:0009897;GO:0042102;GO:0045078;GO:0050776	K06746-ko04514 Cell adhesion molecules (CAMs)	-
ENSG00000102038	0.646002	9.37238	-3.8588	2.4348e-130	4.69167e-129	down	SMARCA1	SWI/SNF related, matrix associated, actin dependent regulator of chromatin, subfamily a, member 1 [Source:HGNC Symbol;Acc:HGNC:11097]	GO:0000790;GO:2000177;GO:0030182;GO:0007420;GO:0043044;GO:0016569;GO:0016818;GO:0004386;GO:0003677;GO:0016787;GO:0005654;GO:0005524;GO:0000166;GO:0043231;GO:0005634;GO:0003676;GO:0016887;GO:0006338;GO:0031491;GO:0016589;GO:0005515;GO:0006355;GO:0006351;GO:0045893;GO:0008134;GO:0000733;GO:0008094;GO:0070615;GO:0036310;GO:0090537	-	KOG0385-Chromatin remodeling complex WSTF-ISWI, small subunit[K]
ENSG00000198836	0.187976	13.7963	-6.19759	3.89915e-130	7.50486e-129	down	OPA1	OPA1, mitochondrial dynamin like GTPase [Source:HGNC Symbol;Acc:HGNC:8140]	GO:0031314;GO:0005739;GO:1900006;GO:0070584;GO:0061003;GO:0048312;GO:0014042;GO:0010636;GO:0007568;GO:0007005;GO:0003924;GO:0005515;GO:0006915;GO:1904115;GO:0005525;GO:0005743;GO:0016787;GO:0005654;GO:0005829;GO:0000166;GO:0016021;GO:0016020;GO:0005741;GO:0000287;GO:0050896;GO:0030425;GO:0005758;GO:0008017;GO:0007601;GO:0042981;GO:0000266;GO:0090398;GO:0090201;GO:1902236;GO:0000002;GO:0003374;GO:…	-	KOG0447-Dynamin-like GTP binding protein[R]
ENSG00000140350	10.0892	39.5955	-1.97252	6.04895e-130	1.16296e-128	down	ANP32A	acidic nuclear phosphoprotein 32 family member A [Source:HGNC Symbol;Acc:HGNC:13233]	GO:0005515;GO:0006355;GO:0006351;GO:0005783;GO:0005737;GO:0005634;GO:0003723;GO:0048471;GO:0043488;GO:0005654;GO:0035556;GO:0006913	-	KOG2739-Leucine-rich acidic nuclear protein[DR]
ENSG00000133142	4.14438	43.7953	-3.40155	6.44365e-130	1.23744e-128	down	TCEAL4	transcription elongation factor A like 4 [Source:HGNC Symbol;Acc:HGNC:26121]	GO:0006355;GO:0006351;GO:0005634;GO:0003746;GO:0006414	-	-
ENSG00000070047	5.15537	18.5551	-1.84767	1.98008e-129	3.79828e-128	down	PHRF1	PHD and ring finger domains 1 [Source:HGNC Symbol;Acc:HGNC:24351]	GO:0046872;GO:0008270;GO:0016020;GO:0070063;GO:0006397;GO:0006366;GO:0019904	-	KOG0825-PHD Zn-finger protein[R]
ENSG00000159069	196.872	152.396	0.369434	2.32459e-129	4.45412e-128	-	FBXW5	F-box and WD repeat domain containing 5 [Source:HGNC Symbol;Acc:HGNC:13613]	GO:0019005;GO:0031146;GO:0016567;GO:0007088;GO:0005515;GO:0005737;GO:0005829;GO:0000209;GO:0043161;GO:0019901;GO:0004842;GO:0010824;GO:0043687;GO:0080008	-	-
ENSG00000178913	1.14556	15.764	-3.78251	4.07664e-129	7.80241e-128	down	TAF7	TATA-box binding protein associated factor 7 [Source:HGNC Symbol;Acc:HGNC:11541]	GO:0005737;GO:0005669;GO:0005634;GO:0030520;GO:0006366;GO:0006357;GO:0035035;GO:0003700;GO:0006355;GO:0006351;GO:0005654;GO:0005794;GO:0006367;GO:0003713;GO:0005515;GO:0000122;GO:0045944;GO:0008134;GO:0044212;GO:0045892;GO:0006368;GO:0006352;GO:1901796;GO:0033276;GO:0071339;GO:0046982;GO:0006469;GO:0042809;GO:0008024;GO:0046966;GO:0051123;GO:0061628;GO:0060260;GO:0005667;GO:0035067;GO:0000296	K03132-ko03022 Basal transcription factors	KOG4011-Transcription initiation factor TFIID, subunit TAF7[K]
ENSG00000142227	736.905	501.259	0.555924	4.37732e-129	8.36849e-128	-	EMP3	epithelial membrane protein 3 [Source:HGNC Symbol;Acc:HGNC:3335]	GO:0016049;GO:0016020;GO:0016021;GO:0005515;GO:0005886;GO:0008219;GO:0008285;GO:0032060	-	-
ENSG00000197498	0.968423	25.6308	-4.7261	5.17482e-129	9.88205e-128	down	RPF2	ribosome production factor 2 homolog [Source:HGNC Symbol;Acc:HGNC:20870]	GO:0005730;GO:0005634;GO:0003723;GO:0019843;GO:0000027;GO:0000463	-	KOG3031-Protein required for biogenesis of the ribosomal 60S subunit[J]
ENSG00000169976	325.295	198.189	0.714875	6.54755e-129	1.24895e-127	-	SF3B5	splicing factor 3b subunit 5 [Source:HGNC Symbol;Acc:HGNC:21083]	GO:0005681;GO:0005634;GO:0008380;GO:0006397;GO:0000398;GO:0005654;GO:0071011;GO:0005686;GO:0005689	K12832-ko03040 Spliceosome	KOG3485-Uncharacterized conserved protein[S]
ENSG00000073578	5.65071	22.6021	-1.99995	1.07997e-128	2.05774e-127	down	SDHA	succinate dehydrogenase complex flavoprotein subunit A [Source:HGNC Symbol;Acc:HGNC:10680]	GO:0043209;GO:0005743;GO:0005739;GO:0022904;GO:0006105;GO:0008177;GO:0005515;GO:0022900;GO:0006099;GO:0016627;GO:0055114;GO:0050660;GO:0016491;GO:0005730;GO:0016020;GO:0007399;GO:0006121;GO:0000104;GO:0005749;GO:0009055;GO:0009061	K00234-ko01200 Carbon metabolism;ko00020 Citrate cycle (TCA cycle);ko00190 Oxidative phosphorylation;ko05010 Alzheimer's disease;ko05012 Parkinson's disease;ko05016 Huntington's disease;ko04932 Non-alcoholic fatty liver disease (NAFLD)	KOG2403-Succinate dehydrogenase, flavoprotein subunit[C]
ENSG00000170776	1.55214	4.04712	-1.38264	1.25177e-128	2.38243e-127	-	AKAP13	A-kinase anchoring protein 13 [Source:HGNC Symbol;Acc:HGNC:371]	GO:0035023;GO:0006468;GO:0004691;GO:0005515;GO:0043547;GO:0005089;GO:0005829;GO:0035556;GO:0046872;GO:0016020;GO:0005737;GO:0005634;GO:0007186;GO:0005085;GO:0051056;GO:0007507;GO:0060348;GO:0005938;GO:0043123;GO:0004871;GO:0030864;GO:0043065;GO:0017048;GO:0032947;GO:0051018;GO:0035025;GO:0055007;GO:0005078;GO:0060297;GO:0071875;GO:0086023;GO:0048471;GO:0015629;GO:0005884;GO:1900169;GO:0071883;GO:…	-	KOG3520-Predicted guanine nucleotide exchange factor[T]
ENSG00000172757	1001.23	880.253	0.185778	1.79908e-128	3.42026e-127	-	CFL1	cofilin 1 [Source:HGNC Symbol;Acc:HGNC:1874]	GO:0015629;GO:0003779;GO:0005622;GO:0030042;GO:0005515;GO:0005886;GO:0016020;GO:0005737;GO:0005634;GO:0005615;GO:0005856;GO:0005925;GO:0042995;GO:0007010;GO:0051015;GO:0070062;GO:0009615;GO:0022604;GO:0031012;GO:0043066;GO:0007266;GO:0016363;GO:0031982;GO:0030036;GO:0032587;GO:0044794;GO:0031258;GO:0061001;GO:0097060;GO:0090732;GO:0043197;GO:0043025;GO:0043005;GO:0031966;GO:0031252;GO:0030864;GO:…	K05765-ko04810 Regulation of actin cytoskeleton;ko04666 Fc gamma R-mediated phagocytosis;ko04360 Axon guidance;ko05133 Pertussis	KOG1735-Actin depolymerizing factor[Z]
ENSG00000139734	0.72104	8.41594	-3.54497	1.86758e-128	3.54653e-127	down	DIAPH3	diaphanous related formin 3 [Source:HGNC Symbol;Acc:HGNC:15480]	GO:0005737;GO:0005634;GO:0007283;GO:0030036;GO:0005829;GO:0003779;GO:0016043;GO:0017048;GO:0045296	K05745-ko04810 Regulation of actin cytoskeleton	KOG1924-RhoA GTPase effector DIA/Diaphanous[TZ]
ENSG00000110651	99.7333	58.8361	0.761372	3.41144e-128	6.47111e-127	-	CD81	CD81 molecule [Source:HGNC Symbol;Acc:HGNC:1701]	GO:0016021;GO:0016020;GO:2000145;GO:0071404;GO:0031623;GO:0005515;GO:0005925;GO:0050776;GO:0005886;GO:0005887;GO:0070062;GO:0007166;GO:0016323;GO:0008284;GO:0016032;GO:0045944;GO:0031982;GO:0046718;GO:0008283;GO:0031647;GO:0001618;GO:0001772;GO:0000187;GO:0050731;GO:0008104;GO:0030449;GO:0023026;GO:1990459;GO:0030890;GO:0043128;GO:0046813;GO:0061462;GO:1904352	K06508-ko04662 B cell receptor signaling pathway;ko05160 Hepatitis C;ko05144 Malaria	KOG3882-Tetraspanin family integral membrane protein[R]
ENSG00000136436	1.64469	13.0394	-2.98698	4.80128e-128	9.09734e-127	down	CALCOCO2	calcium binding and coiled-coil domain 2 [Source:HGNC Symbol;Acc:HGNC:29912]	GO:0005515;GO:0005829;GO:0043231;GO:0016020;GO:0005737;GO:0048471;GO:0005856;GO:0031410;GO:0006914;GO:0000421;GO:0042803;GO:0005634;GO:0098792;GO:0034341;GO:0005776;GO:1901098;GO:0016032	-	-
ENSG00000158290	0.529319	7.70656	-3.86388	6.76556e-128	1.2805e-126	down	CUL4B	cullin 4B [Source:HGNC Symbol;Acc:HGNC:2555]	GO:0005515;GO:0016567;GO:0005654;GO:0005829;GO:0005634;GO:0006511;GO:0007049;GO:0006281;GO:0006974;GO:0031625;GO:0031461;GO:0070062;GO:0061630;GO:0042787;GO:0006283;GO:0003684;GO:0043687;GO:0042769;GO:0035518;GO:0006293;GO:0006295;GO:0006296;GO:0033683;GO:0070911;GO:0000715;GO:0000717;GO:0006294;GO:0031465;GO:0070914;GO:1900087;GO:0045732;GO:0031175	K10609-ko04120 Ubiquitin mediated proteolysis;ko03420 Nucleotide excision repair	KOG2167-Cullins[D]
ENSG00000235173	29.1796	11.9962	1.28238	7.84225e-128	1.48263e-126	up	HGH1	HGH1 homolog [Source:HGNC Symbol;Acc:HGNC:24161]	GO:0003674;GO:0008150;GO:0005575	-	KOG2973-Uncharacterized conserved protein[S]
ENSG00000083312	0.41756	20.8148	-5.63948	9.90233e-128	1.87002e-126	down	TNPO1	transportin 1 [Source:HGNC Symbol;Acc:HGNC:6401]	GO:0005515;GO:0015031;GO:0006886;GO:0005737;GO:0005634;GO:0006810;GO:0003723;GO:0008536;GO:0035735;GO:0005929;GO:0005829;GO:0070062;GO:0043488;GO:0008565;GO:0006607;GO:0016032;GO:0031965;GO:0034399;GO:0008139;GO:0006610;GO:0000060	-	KOG2023-Nuclear transport receptor Karyopherin-beta2/Transportin (importin beta superfamily)[YU]
ENSG00000225921	17.9565	67.6773	-1.91416	1.24265e-127	2.34411e-126	down	NOL7	nucleolar protein 7 [Source:HGNC Symbol;Acc:HGNC:21040]	GO:0005739;GO:0005730;GO:0005634;GO:0003723	-	-
ENSG00000076984	1.80259	18.9962	-3.39756	1.39391e-127	2.62654e-126	down	MAP2K7	mitogen-activated protein kinase kinase 7 [Source:HGNC Symbol;Acc:HGNC:6847]	GO:0005515;GO:0018108;GO:0004713;GO:0016310;GO:0016301;GO:0016740;GO:0006468;GO:0005524;GO:0004674;GO:0000166;GO:0004672;GO:0046872;GO:0005737;GO:0005634;GO:0006915;GO:0000287;GO:0038095;GO:0005829;GO:0007165;GO:0009411;GO:0004702;GO:0019899;GO:0019901;GO:0004708;GO:0019903;GO:0006970;GO:0007254;GO:0007257;GO:0009408;GO:0032212;GO:0034612;GO:0035897;GO:0051403;GO:0051973;GO:1904355	K04431-ko04141 Protein processing in endoplasmic reticulum;ko04010 MAPK signaling pathway;ko04013 MAPK signaling pathway - fly;ko04012 ErbB signaling pathway;ko04668 TNF signaling pathway;ko04214 Apoptosis - fly;ko04620 Toll-like receptor signaling pathway;ko04624 Toll and Imd signaling pathway;ko04660 T cell receptor signaling pathway;ko04664 Fc epsilon RI signaling pathway;ko04912 GnRH signalin…	KOG0983-Mitogen-activated protein kinase (MAPK) kinase MKK7/JNKK2[T]
ENSG00000067798	2.74887	50.2938	-4.19347	2.87606e-127	5.41335e-126	down	NAV3	neuron navigator 3 [Source:HGNC Symbol;Acc:HGNC:15998]	GO:0005524;GO:0016020;GO:0005634;GO:0005640	-	-
ENSG00000167543	248.461	177.651	0.483976	3.18222e-127	5.98299e-126	-	TP53I13	tumor protein p53 inducible protein 13 [Source:HGNC Symbol;Acc:HGNC:25102]	GO:0016021;GO:0016020;GO:0005886;GO:0005737	-	-
ENSG00000024048	0.451888	5.10935	-3.4991	3.32211e-127	6.23912e-126	down	UBR2	ubiquitin protein ligase E3 component n-recognin 2 [Source:HGNC Symbol;Acc:HGNC:21289]	GO:0005515;GO:0016567;GO:0016740;GO:0046872;GO:0008270;GO:0005634;GO:0030163;GO:0005737;GO:0000151;GO:0005829;GO:0000209;GO:0061630;GO:0032007;GO:0006342;GO:0004842;GO:0033522;GO:0070728;GO:0071233;GO:0071596;GO:0000785;GO:0007283;GO:0007141;GO:0006511	-	KOG1140-N-end rule pathway, recognition component UBR1[O]
ENSG00000164985	0.315211	16.7464	-5.73139	3.4228e-127	6.42114e-126	down	PSIP1	PC4 and SFRS1 interacting protein 1 [Source:HGNC Symbol;Acc:HGNC:9527]	GO:0005515;GO:0006355;GO:0006351;GO:0003677;GO:0005654;GO:0005634;GO:0003723;GO:0000395;GO:0005829;GO:0016032;GO:0006979;GO:0009408;GO:0097100;GO:0051169;GO:0075713;GO:0035327	-	KOG1904-Transcription coactivator[K]
ENSG00000110880	8.82838	29.0709	-1.71935	3.64514e-127	6.83074e-126	down	CORO1C	coronin 1C [Source:HGNC Symbol;Acc:HGNC:2254]	GO:0030036;GO:0005886;GO:0015629;GO:0003779;GO:0051015;GO:0016020;GO:0005737;GO:0005856;GO:0005925;GO:0042995;GO:0005515;GO:0030027;GO:0016328;GO:0007165;GO:0001933;GO:0031982;GO:0051895;GO:1900025;GO:0001932;GO:0090630;GO:0051893;GO:0001755;GO:0045184;GO:0016600;GO:0044387;GO:0006909;GO:2000394;GO:0010633;GO:0010632;GO:0010762;GO:1900024;GO:1900027;GO:0048365	-	KOG0303-Actin-binding protein Coronin, contains WD40 repeats[Z]
ENSG00000183648	182.878	372.78	-1.02745	8.39728e-127	1.57186e-125	down	NDUFB1	NADH:ubiquinone oxidoreductase subunit B1 [Source:HGNC Symbol;Acc:HGNC:7695]	GO:0005739;GO:0055114;GO:0005743;GO:0016021;GO:0016020;GO:0016607;GO:0070469;GO:0003954;GO:0070062;GO:0008137;GO:0006120;GO:0032981;GO:0005747	K03957-ko00190 Oxidative phosphorylation;ko05010 Alzheimer's disease;ko05012 Parkinson's disease;ko05016 Huntington's disease;ko04932 Non-alcoholic fatty liver disease (NAFLD)	-
ENSG00000197386	1.16393	8.97638	-2.94712	1.38004e-126	2.58041e-125	down	HTT	huntingtin [Source:HGNC Symbol;Acc:HGNC:4851]	GO:0016234;GO:0031648;GO:0048471;GO:0031072;GO:0043065;GO:0005737;GO:0005634;GO:0005515;GO:0043234;GO:0005829;GO:0005794;GO:0005783;GO:0005654;GO:0006915;GO:0030659;GO:0030425;GO:0042802;GO:0008134;GO:0030424;GO:0006890;GO:0044325;GO:0005770;GO:0005776;GO:0047496;GO:0048487;GO:0000132;GO:0007030;GO:0002039;GO:2001237;GO:1903599;GO:0019900;GO:0005522;GO:0034452;GO:0045505;GO:0031587;GO:0042297;GO:…	K04533-ko05016 Huntington's disease	-
ENSG00000244165	5.90144	23.7366	-2.00797	1.56013e-126	2.91394e-125	down	P2RY11	purinergic receptor P2Y11 [Source:HGNC Symbol;Acc:HGNC:8540]	GO:0007165;GO:0004871;GO:0005886;GO:0005622;GO:0007186;GO:0004930;GO:0016021;GO:0016020;GO:0045028;GO:0035589;GO:0005887;GO:0004872;GO:0006952;GO:0019722;GO:0007190;GO:0007200;GO:0045031;GO:0023041;GO:0030594;GO:0001973;GO:0071318	K08387-ko04080 Neuroactive ligand-receptor interaction	-
ENSG00000155097	2.49283	16.9785	-2.76785	1.92793e-126	3.59697e-125	down	ATP6V1C1	ATPase H+ transporting V1 subunit C1 [Source:HGNC Symbol;Acc:HGNC:856]	GO:0006811;GO:0006810;GO:0015078;GO:0015991;GO:0015992;GO:0033180;GO:0031410;GO:0045177;GO:0005886;GO:0005737;GO:0008553;GO:0005515;GO:0005765;GO:0005829;GO:0070062;GO:0034220;GO:0005215;GO:0046961;GO:0008286;GO:0016241;GO:0033572;GO:0090383;GO:0000221;GO:0016469	K02148-ko00190 Oxidative phosphorylation;ko04150 mTOR signaling pathway;ko04145 Phagosome;ko04966 Collecting duct acid secretion;ko04721 Synaptic vesicle cycle;ko05323 Rheumatoid arthritis;ko05110 Vibrio cholerae infection;ko05120 Epithelial cell signaling in Helicobacter pylori infection	KOG2909-Vacuolar H+-ATPase V1 sector, subunit C[C]
ENSG00000139428	92.9772	87.3486	0.0900911	2.08679e-126	3.88911e-125	-	MMAB	methylmalonic aciduria (cobalamin deficiency) cblB type [Source:HGNC Symbol;Acc:HGNC:19331]	GO:0005739;GO:0005515;GO:0016740;GO:0005524;GO:0000166;GO:0005759;GO:0009235;GO:0009236;GO:0008817	K00798-ko00860 Porphyrin and chlorophyll metabolism	-
ENSG00000155506	14.3335	57.9623	-2.01573	2.78079e-126	5.17683e-125	down	LARP1	La ribonucleoprotein domain family member 1 [Source:HGNC Symbol;Acc:HGNC:29531]	GO:0005515;GO:0006413;GO:0006412;GO:0016020;GO:0005737;GO:0003723;GO:0045296;GO:0006417;GO:0008283;GO:0017148;GO:0010494;GO:0016239;GO:0003730;GO:0008190;GO:0031369;GO:0048027;GO:0031931;GO:0045070;GO:0005844;GO:0008494;GO:0045727;GO:0048255;GO:0031929;GO:0000339;GO:0038202;GO:0072752;GO:1990928	-	-
[truncated: 57,259 more rows]
